# Supplementary material for: Genomic insights into the complex demographic history and inbreeding phenomena during Zhou Dynasty on the Central Plains of China
Source: Frontiers journal article supplement (doi:10.3389/fmicb.2024.1471740), 2024-09-13
Supplement: Table_1.XLSX [file Table_1.XLSX]

## Sheet: A
Table S1A. All sample information, related to Table 1.
SampleID	Site	Skeletal element	Location	Number of reads sequenced	endogenous	library length	mtDNA contamination	X chromosome contamination	mt/nu	Autosomal Coverage	bio. sex	#SNPs 1240k
GZH2266	Guanzhuang Site	petrous	34°51'03''N, 113°22'32''E	35407994	0.362299	77.66	0.017	0.016023	59.847	0.2375	Male	121965
GZM10	Guanzhuang Site	tooth	34°51'03''N, 113°22'32''E	43721414	0.0382001	62.87	0.02	-	192.313	0.0251	Female	18857
GZM19-2G	Guanzhuang Site	petrous	34°51'03''N, 113°22'32''E	27509823	0.651662	57.83	0.011	0.0034	58.781	0.2819	Male	213452
GZM25-1d	Guanzhuang Site	tooth	34°51'03''N, 113°22'32''E	22837946	0.052169	53.75	0.064	0.04496	336.789	0.017	Male	13187
GZM26	Guanzhuang Site	tooth	34°51'03''N, 113°22'32''E	9750494	0.797603	55.2	0.038	0.0270024	54.099	0.1079	Male	76239
GZM27	Guanzhuang Site	tooth	34°51'03''N, 113°22'32''E	48899344	0.152111	58.09	0.01	-	56.634	0.0972	Female	66364
GZM43K	Guanzhuang Site	tooth	34°51'03''N, 113°22'32''E	11726363	0.119175	58.27	0.014	-	189.497	0.0214	Female	19672
GZM5G	Guanzhuang Site	petrous	34°51'03''N, 113°22'32''E	45612181	0.670868	56.39	0.01	0.002684	70.916	0.4924	Male	292496
GZM76	Guanzhuang Site	petrous	34°51'03''N, 113°22'32''E	55847099	0.751743	63.37	0.01	0.007655	39.374	0.9527	Male	417696
GZW10	Guanzhuang Site	petrous	34°51'03''N, 113°22'32''E	52721331	0.208994	52.15	0.039	-	102.974	0.1634	Female	116097
GZW29erc	Guanzhuang Site	petrous	34°51'03''N, 113°22'32''E	21743864	0.74886	54.01	0.008	0.008307	125.414	0.2356	Male	163457

## Sheet: B
Table S1B. The relationship results of the ancient Guanzhuang individuals.
READ method								PMR method							Kin method
Individual 1	Individual 2	Normalized2AlleleDifference	StandardError	NonNormalizedP0	NonNormalizedStandardError	Relatedness		Individual 1	Individual 2	Relatedness	nSNPs	nmismatch	pmismatch		Individual 1	Individual 2	Relatedness	Log Likelihood Ratio	kk1	k2	IBD Length	IBD Number
GZH2266	GZM10	0.992616	0.0330006	0.235562	0.00783151	Unrelated		GZM10	GZM43K	Unrelated	314	72	0.2293		GZH2266	GZM10	Unrelated	3.652	1	0	0	0
GZH2266	GZM19-2G	1.02966	0.0142717	0.244353	0.00338688	Unrelated		GZM10	GZM19-2G	Unrelated	4271	1002	0.23461		GZH2266	GZM19-2G	Unrelated	11.956	1	0	0	0
GZH2266	GZM26	1.03455	0.0213778	0.245513	0.00507326	Unrelated		GZM26	GZM43K	Unrelated	1435	340	0.23693		GZH2266	GZM26	Unrelated	8.699	1	0	0	0
GZH2266	GZM27	1.02646	0.019868	0.243593	0.00471496	Unrelated		GZM27	GZW29erc	Unrelated	14890	3545	0.23808		GZH2266	GZM27	Unrelated	8.077	1	0	0	1
GZH2266	GZM43K	1.11425	0.0448004	0.264428	0.0106318	Unrelated		GZM26	GZW10	Unrelated	11028	2630	0.23848		GZH2266	GZM43K	Unrelated	3.81	1	0	0	0
GZH2266	GZM5G	1.01631	0.011438	0.241185	0.00271439	Unrelated		GZM19-2G	GZW10	Unrelated	28469	6801	0.23889		GZH2266	GZM5G	Unrelated	12.831	1	0	0	1
GZH2266	GZM76	1.03211	0.00972117	0.244935	0.00230697	Unrelated		GZM10	GZM26	Unrelated	1654	396	0.23942		GZH2266	GZM76	Unrelated	17.531	1	0	0	0
GZH2266	GZW10	1.01149	0.0164418	0.240042	0.00390188	Unrelated		GZM10	GZM5G	Unrelated	6560	1575	0.24009		GZH2266	GZW10	Unrelated	8.949	1	0	0	1
GZH2266	GZW29erc	1.02984	0.0147453	0.244396	0.00349928	Unrelated		GZM27	GZM5G	Unrelated	25955	6233	0.24015		GZH2266	GZW29erc	Unrelated	11.687	1	0	0	0
GZM10	GZM19-2G	0.990562	0.0312184	0.235075	0.00740857	Unrelated		GZM26	GZM27	Unrelated	6420	1543	0.24034		GZM10	GZM19-2G	Unrelated	0.403	0.873	0.127	0	0
GZM10	GZM26	0.997949	0.0461322	0.236828	0.0109478	Unrelated		GZM26	GZW29erc	Unrelated	15361	3693	0.24041		GZM10	GZM26	Unrelated	0.478	1	0	0	0
GZM10	GZM27	0.998917	0.0449989	0.237057	0.0106789	Unrelated		GZM19-2G	GZM27	Unrelated	16439	3967	0.24132		GZM10	GZM27	Unrelated	2.45	1	0	0	0
GZM10	GZM43K	0.933441	0.0963572	0.221519	0.022867	Unrelated		GZM43K	GZM5G	Unrelated	5313	1286	0.24205		GZM10	GZM43K	Unrelated	0.178	1	0	0	0
GZM10	GZM5G	0.995604	0.0264106	0.236271	0.00626761	Unrelated		GZM5G	GZW10	Unrelated	44638	10805	0.24206		GZM10	GZM5G	Unrelated	3.45	1	0	0	0
GZM10	GZM76	1.02757	0.0218135	0.243857	0.00517667	Unrelated		GZM5G	GZW29erc	Unrelated	61965	14999	0.24206		GZM10	GZM76	Unrelated	9.147	1	0	0	0
GZM10	GZW10	1.01849	0.0378216	0.241703	0.0089756	Unrelated		GZM19-2G	GZW29erc	Unrelated	40335	9780	0.24247		GZM10	GZW10	Unrelated	0.976	0.939	0.061	0	0
GZM10	GZW29erc	1.03801	0.033242	0.246334	0.0078888	Unrelated		GZM27	GZW10	Unrelated	10642	2582	0.24262		GZM10	GZW29erc	Unrelated	3.518	1	0	0	0
GZM19-2G	GZM26	0.974981	0.0162996	0.231377	0.00386813	Unrelated		GZM19-2G	GZM26	Unrelated	18031	4377	0.24275		GZM19-2G	GZM26	Unrelated	8.366	1	0	0	0
GZM19-2G	GZM27	0.979796	0.0173564	0.23252	0.00411893	Unrelated		GZM10	GZW10	Unrelated	2703	658	0.24343		GZM19-2G	GZM27	Unrelated	2.718	0.934	0.066	0	0
GZM19-2G	GZM43K	1.05509	0.0336122	0.250389	0.00797665	Unrelated		GZM26	GZM5G	Unrelated	26750	6513	0.24348		GZM19-2G	GZM43K	Unrelated	4.914	1	0	0	0
GZM19-2G	GZM5G	1	0.00987994	0.237314	0.00234465	Unrelated		GZM27	GZM43K	Unrelated	1181	288	0.24386		GZM19-2G	GZM5G	Unrelated	15.58	1	0	0	0
GZM19-2G	GZM76	0.995174	0.00875325	0.236169	0.00207727	Unrelated		GZW10	GZW29erc	Unrelated	25486	6215	0.24386		GZM19-2G	GZM76	Unrelated	14.846	1	0	0	0
GZM19-2G	GZW10	0.962612	0.0133905	0.228442	0.00317775	Unrelated		GZM19-2G	GZM5G	Unrelated	70237	17142	0.24406		GZM19-2G	GZW10	Unrelated	4.98	0.944	0.056	0	2
GZM19-2G	GZW29erc	1.00163	0.0122237	0.237702	0.00290087	Unrelated		GZM27	GZM76	Unrelated	38597	9450	0.24484		GZM19-2G	GZW29erc	Unrelated	13.285	1	0	0	0
GZM26	GZM27	1.01018	0.0266864	0.239731	0.00633308	Unrelated		GZM19-2G	GZM76	Unrelated	101379	24844	0.24506		GZM26	GZM27	Unrelated	1.67	0.938	0.062	0	0
GZM26	GZM43K	0.987949	0.0497492	0.234454	0.0118062	Unrelated		GZM5G	GZM76	Unrelated	160398	39377	0.2455		GZM26	GZM43K	Unrelated	0.554	0.938	0.062	0	0
GZM26	GZM5G	1.01044	0.0145175	0.239791	0.00344521	Unrelated		GZM76	GZW10	Unrelated	64964	15960	0.24567		GZM26	GZM5G	Unrelated	11.091	1	0	0	0
GZM26	GZM76	1.00005	0.0120343	0.237326	0.00285591	Unrelated		GZM43K	GZW29erc	Unrelated	3161	777	0.24581		GZM26	GZM76	Unrelated	12.802	1	0	0	0
GZM26	GZW10	0.972483	0.020404	0.230784	0.00484215	Unrelated		GZM26	GZM76	Unrelated	38405	9487	0.24703		GZM26	GZW10	Unrelated	2.571	0.939	0.061	0	0
GZM26	GZW29erc	0.979188	0.0183679	0.232375	0.00435898	Unrelated		GZH2266	GZM10	Unrelated	3622	898	0.24793		GZM26	GZW29erc	Unrelated	6.951	1	0	0	0
GZM27	GZM43K	1.00929	0.0537089	0.23952	0.0127459	Unrelated		GZM43K	GZM76	Unrelated	7278	1807	0.24828		GZM27	GZM43K	Unrelated	1.23	1	0	0	0
GZM27	GZM5G	0.980667	0.0146429	0.232726	0.00347496	Unrelated		GZM76	GZW29erc	Unrelated	90808	22551	0.24834		GZM27	GZM5G	Unrelated	5.634	0.944	0.056	0	51
GZM27	GZM76	0.99326	0.0123764	0.235715	0.0029371	Unrelated		GZH2266	GZM27	Unrelated	13130	3265	0.24867		GZM27	GZM76	Unrelated	9.591	1	0	0	0
GZM27	GZW10	0.99038	0.0209224	0.235031	0.00496519	Unrelated		GZH2266	GZW10	Unrelated	19953	4967	0.24893		GZM27	GZW10	Unrelated	1.684	0.886	0.114	0	1
GZM27	GZW29erc	0.994546	0.0183223	0.23602	0.00434815	Unrelated		GZH2266	GZW29erc	Unrelated	28661	7138	0.24905		GZM27	GZW29erc	Unrelated	3.017	0.938	0.062	0	0
GZM43K	GZM5G	0.987278	0.0282066	0.234295	0.00669384	Unrelated		GZH2266	GZM5G	Unrelated	51172	12773	0.24961		GZM43K	GZM5G	Unrelated	1.812	0.935	0.065	0	0
GZM43K	GZM76	1.02281	0.0253281	0.242727	0.00601073	Unrelated		GZM10	GZW29erc	Unrelated	3793	950	0.25046		GZM43K	GZM76	Unrelated	5.103	1	0	0	0
GZM43K	GZW10	1.02388	0.0410475	0.242981	0.00974115	Unrelated		GZM10	GZM27	Unrelated	1672	419	0.2506		GZM43K	GZW10	Unrelated	2.582	1	0	0	0
GZM43K	GZW29erc	1.02473	0.0358827	0.243183	0.00851549	Unrelated		GZH2266	GZM26	Unrelated	11529	2898	0.25137		GZM43K	GZW29erc	Unrelated	2.066	1	0	0	0
GZM5G	GZM76	1.00259	0.00757198	0.237929	0.00179694	Unrelated		GZM10	GZM76	Unrelated	10145	2551	0.25145		GZM5G	GZM76	Unrelated	16.849	1	0	0	0
GZM5G	GZW10	0.992799	0.0110992	0.235606	0.002634	Unrelated		GZM43K	GZW10	Unrelated	2135	537	0.25152		GZM5G	GZW10	Unrelated	11.932	1	0	0	1
GZM5G	GZW29erc	0.982585	0.0102759	0.233182	0.00243862	Unrelated		GZH2266	GZM19-2G	Unrelated	30834	7804	0.2531		GZM5G	GZW29erc	Unrelated	11.667	1	0	0	0
GZM76	GZW10	1.01325	0.0103429	0.240459	0.00245453	Unrelated		GZM19-2G	GZM43K	Unrelated	3826	974	0.25457		GZM76	GZW10	Unrelated	11.343	1	0	0	0
GZM76	GZW29erc	1.01139	0.0093263	0.240017	0.00221326	Unrelated		GZH2266	GZM76	Unrelated	82892	21169	0.25538		GZM76	GZW29erc	Unrelated	18.126	1	0	0	0
GZW10	GZW29erc	0.993295	0.0142994	0.235723	0.00339346	Unrelated		GZH2266	GZM43K	Unrelated	1997	532	0.2664		GZW10	GZW29erc	Unrelated	7.946	1	0	0	0

## Sheet: C
Table S1C. ROH results of the Guanzhuang individuals and previously published samples from the Lusixi site during the Spring and Autumn period . To ensure the robustness of the results, we restricted ROH analysis exclusively to samples containing over 100,000 SNPs overlapping with the "1240k" panel.
iid	Site	max_roh	sum_roh>4	n_roh>4	sum_roh>8	n_roh>8	sum_roh>12	n_roh>12	sum_roh>20	n_roh>20
GZW29erc	Guanzhuang	44.2324	135.208	9	112.261	5	100.8554119999999786.42630699999998	4	86.4263	3
GZM76	Guanzhuang	4.0965	4.0965	1	0	0	0	0	0	0
GZW10	Guanzhuang	0	0	0	0	0	0	0	0	0
GZH2266	Guanzhuang	0	0	0	0	0	0	0	0	0
GZM19-2G	Guanzhuang	0	0	0	0	0	0	0	0	0
GZM5G	Guanzhuang	0	0	0	0	0	0	0	0	0
CM74	Lusixi	34.3164	211.408	20	168.464	12	109.2	6	34.3164	1
CM70	Lusixi	6.6638	15.191	3	0	0	0	0	0	0
CM33	Lusixi	6.0831	6.0831	1	0	0	0	0	0	0
CM66	Lusixi	5.4781	5.4781	1	0	0	0	0	0	0
CM76-2	Lusixi	5.1422	5.1422	1	0	0	0	0	0	0
CM71	Lusixi	0	0	0	0	0	0	0	0	0
CM94	Lusixi	0	0	0	0	0	0	0	0	0
CM85	Lusixi	0	0	0	0	0	0	0	0	0
CM79	Lusixi	0	0	0	0	0	0	0	0	0
CM10	Lusixi	0	0	0	0	0	0	0	0	0
CM114	Lusixi	0	0	0	0	0	0	0	0	0
CM65	Lusixi	0	0	0	0	0	0	0	0	0
CM62	Lusixi	0	0	0	0	0	0	0	0	0
CM57	Lusixi	0	0	0	0	0	0	0	0	0
CM4	Lusixi	0	0	0	0	0	0	0	0	0
CM32	Lusixi	0	0	0	0	0	0	0	0	0
CM121	Lusixi	0	0	0	0	0	0	0	0	0

## Sheet: D
Table S1D. Outgroup f3 results of the Guanzhuang/Guanzhuang_o populations with all populations in the 1240K dataset. Populations with fewer than 10,000 SNPs were excluded. The top 30 populations exhibiting the highest genetic drift with the Guanzhuang/Guanzhuang_o populations were highlighted in orange.
f3(Guanzhuang, Reference; Mbuti)								f3(Guanzhuang_o, Reference; Mbuti)
Ref1	Ref2	Target	f3	SE	Z	nSNPs		Ref1	Ref2	Target	f3	SE	Z	nSNPs
Guanzhuang	China_Miaozigou_MN	Mbuti	0.316331	0.00349	90.649	143976		Guanzhuang_o	China_WLR_BA_o	Mbuti	0.324268	0.010315	31.438	10743
Guanzhuang	CHB.SG	Mbuti	0.315447	0.002662	118.514	582231		Guanzhuang_o	China_Shimao_LN	Mbuti	0.317223	0.008059	39.361	13724
Guanzhuang	JXNT	Mbuti	0.315139	0.002799	112.576	470012		Guanzhuang_o	Guanzhuang	Mbuti	0.31412	0.008157	38.509	11252
Guanzhuang	CHS.SG	Mbuti	0.31499	0.002651	118.828	580132		Guanzhuang_o	Tujia.DG	Mbuti	0.311912	0.007023	44.415	13894
Guanzhuang	She.DG	Mbuti	0.314566	0.002833	111.042	526185		Guanzhuang_o	CHS.SG	Mbuti	0.310343	0.006036	51.414	15473
Guanzhuang	Korean.DG	Mbuti	0.314488	0.002744	114.597	527616		Guanzhuang_o	China_YR_LN	Mbuti	0.310123	0.006681	46.418	14410
Guanzhuang	JPT.SG	Mbuti	0.314149	0.002655	118.328	579218		Guanzhuang_o	JXNT	Mbuti	0.30962	0.008123	38.117	12181
Guanzhuang	Guanzhuang_o	Mbuti	0.31412	0.008157	38.509	11252		Guanzhuang_o	CHB.SG	Mbuti	0.309092	0.005949	51.955	15526
Guanzhuang	China_Shimao_LN	Mbuti	0.314045	0.002801	112.127	522470		Guanzhuang_o	Han.DG	Mbuti	0.308692	0.006504	47.46	14137
Guanzhuang	China_YR_LN	Mbuti	0.313977	0.002689	116.749	545947		Guanzhuang_o	China_WLR_MN	Mbuti	0.308344	0.008203	37.591	13768
Guanzhuang	LG	Mbuti	0.31395	0.002856	109.941	461766		Guanzhuang_o	JPT.SG	Mbuti	0.308319	0.005928	52.008	15448
Guanzhuang	Han.DG	Mbuti	0.313898	0.002702	116.189	533709		Guanzhuang_o	Mongolia_Xiongnu_o1.SG	Mbuti	0.308268	0.007555	40.803	14145
Guanzhuang	China_Upper_YR_LN	Mbuti	0.313807	0.002745	114.328	531847		Guanzhuang_o	China_Upper_YR_IA	Mbuti	0.307964	0.007383	41.712	13147
Guanzhuang	China_Upper_YR_IA	Mbuti	0.313182	0.002813	111.337	502796		Guanzhuang_o	Naxi.DG	Mbuti	0.307903	0.006554	46.979	14139
Guanzhuang	China_YR_MN	Mbuti	0.313124	0.002755	113.645	530528		Guanzhuang_o	Mongolia_Selenge_Xiongnu	Mbuti	0.30774	0.010271	29.962	10292
Guanzhuang	Miao.DG	Mbuti	0.313098	0.002734	114.526	526858		Guanzhuang_o	Atayal.DG	Mbuti	0.307695	0.007504	41.004	13567
Guanzhuang	Mongolia_Selenge_Xiongnu	Mbuti	0.312959	0.003061	102.234	376971		Guanzhuang_o	Japanese.DG	Mbuti	0.307673	0.006511	47.255	14101
Guanzhuang	Tujia.DG	Mbuti	0.312747	0.002827	110.636	527202		Guanzhuang_o	Hezhen.DG	Mbuti	0.307624	0.006675	46.086	13916
Guanzhuang	China_WLR_MN	Mbuti	0.311077	0.002938	105.874	524985		Guanzhuang_o	Russia_LenaRiver_EN.SG	Mbuti	0.307424	0.009232	33.301	11494
Guanzhuang	Russia_Blagovechensk_IA.SG	Mbuti	0.31081	0.003395	91.549	212070		Guanzhuang_o	Ami.DG	Mbuti	0.30741	0.006913	44.467	13883
Guanzhuang	China_WLR_LN	Mbuti	0.310665	0.002869	108.274	404370		Guanzhuang_o	Sherpa.DG	Mbuti	0.30693	0.006913	44.397	13882
Guanzhuang	Atayal.DG	Mbuti	0.310527	0.002933	105.874	515996		Guanzhuang_o	She.DG	Mbuti	0.306334	0.006798	45.059	13869
Guanzhuang	Naxi.DG	Mbuti	0.31046	0.002751	112.848	533895		Guanzhuang_o	Russia_DevilsCave_N.SG_mother.or.daughter.NEO240.SG	Mbuti	0.30617	0.009606	31.874	10349
Guanzhuang	Yi.DG	Mbuti	0.310349	0.002754	112.688	527841		Guanzhuang_o	Miao.DG	Mbuti	0.305869	0.006917	44.219	13905
Guanzhuang	Japanese.DG	Mbuti	0.310268	0.002728	113.73	533351		Guanzhuang_o	China_YR_MN	Mbuti	0.305725	0.007607	40.191	13953
Guanzhuang	Mongolia_Xiongnu_o1.SG	Mbuti	0.310154	0.002828	109.671	536266		Guanzhuang_o	Kinh.DG	Mbuti	0.305633	0.006562	46.576	13895
Guanzhuang	Ami.DG	Mbuti	0.31008	0.002741	113.138	526066		Guanzhuang_o	Mongola.DG	Mbuti	0.30455	0.006887	44.222	13953
Guanzhuang	China_YR_LBIA	Mbuti	0.309937	0.002937	105.534	371297		Guanzhuang_o	China_Upper_YR_LN	Mbuti	0.304482	0.006927	43.956	14005
Guanzhuang	China_WLR_BA	Mbuti	0.309821	0.003089	100.312	259156		Guanzhuang_o	Russia_DevilsCave_N.SG	Mbuti	0.304236	0.007534	40.384	14144
Guanzhuang	Russia_CentralYakutia_IA.SG	Mbuti	0.309298	0.00586	52.784	34268		Guanzhuang_o	China_Lahu.DG	Mbuti	0.304178	0.006784	44.835	13889
Guanzhuang	Russia_DevilsCave_N.SG	Mbuti	0.309027	0.00284	108.814	535781		Guanzhuang_o	Taiwan_Hanben_IA	Mbuti	0.304094	0.006639	45.804	14530
Guanzhuang	CDX.SG	Mbuti	0.308907	0.002619	117.944	580201		Guanzhuang_o	CDX.SG	Mbuti	0.303889	0.005949	51.08	15476
Guanzhuang	KHV.SG	Mbuti	0.308683	0.002631	117.339	582488		Guanzhuang_o	Dai.DG	Mbuti	0.303453	0.006284	48.291	14810
Guanzhuang	Kinh.DG	Mbuti	0.308608	0.002749	112.247	527462		Guanzhuang_o	KHV.SG	Mbuti	0.3032	0.00593	51.129	15546
Guanzhuang	Boshan	Mbuti	0.308315	0.003035	101.589	398595		Guanzhuang_o	Kazakhstan_Nomad_Hun_Sarmatian.SG	Mbuti	0.302731	0.008649	35.001	11855
Guanzhuang	CHS_o.SG	Mbuti	0.30796	0.002854	107.905	483404		Guanzhuang_o	Liangdao2	Mbuti	0.302717	0.010104	29.96	18594
Guanzhuang	Daur.DG	Mbuti	0.307693	0.002823	108.977	516896		Guanzhuang_o	LG	Mbuti	0.302265	0.008174	36.978	11943
Guanzhuang	Dai.DG	Mbuti	0.30753	0.002663	115.477	556521		Guanzhuang_o	Xibo.DG	Mbuti	0.302074	0.006677	45.239	13965
Guanzhuang	China_HMMH_MN	Mbuti	0.307349	0.003149	97.613	321662		Guanzhuang_o	Tu.DG	Mbuti	0.301889	0.006597	45.761	13962
Guanzhuang	Malaysia_historical.SG	Mbuti	0.307347	0.003259	94.313	224260		Guanzhuang_o	Yi.DG	Mbuti	0.301808	0.00662	45.59	13915
Guanzhuang	Mongola.DG	Mbuti	0.30734	0.00275	111.757	528123		Guanzhuang_o	Korean.DG	Mbuti	0.301595	0.006678	45.164	13911
Guanzhuang	Taiwan_Hanben_IA	Mbuti	0.307275	0.00265	115.942	551778		Guanzhuang_o	Russia_CentralYakutia_LN.SG	Mbuti	0.300755	0.008291	36.274	13463
Guanzhuang	Russia_KadalinkaRiver_N.SG	Mbuti	0.307069	0.003103	98.957	489362		Guanzhuang_o	Russia_Krasnoyarsk_BA.SG	Mbuti	0.300676	0.008534	35.232	13790
Guanzhuang	Russia_EarlyMedieval_Heshui_Mohe_1	Mbuti	0.307044	0.003739	82.12	97298		Guanzhuang_o	Mongolia_Arkhangai_Xiongnu_o	Mbuti	0.300071	0.009888	30.348	10072
Guanzhuang	Mongolia_Tuv_EIA	Mbuti	0.307017	0.003227	95.131	229878		Guanzhuang_o	Mongolia_Tuv_Xiongnu	Mbuti	0.300037	0.009095	32.991	10899
Guanzhuang	Xibo.DG	Mbuti	0.306873	0.002724	112.653	528015		Guanzhuang_o	Russia_MN_Boisman	Mbuti	0.299797	0.008422	35.597	10607
Guanzhuang	Hezhen.DG	Mbuti	0.306772	0.002795	109.764	527341		Guanzhuang_o	Daur.DG	Mbuti	0.299673	0.007399	40.502	13586
Guanzhuang	China_WLR_BA_o	Mbuti	0.30676	0.003192	96.102	342910		Guanzhuang_o	Oroqen.DG	Mbuti	0.299122	0.006872	43.526	13907
Guanzhuang	Russia_Chita_BA.SG	Mbuti	0.306754	0.004287	71.547	76940		Guanzhuang_o	Russia_KadalinkaRiver_N.SG	Mbuti	0.299033	0.008969	33.341	12724
Guanzhuang	Nepal_Chokhopani_2800BP.SG	Mbuti	0.306632	0.00301	101.856	525868		Guanzhuang_o	China_WLR_LN	Mbuti	0.297801	0.009434	31.568	10390
Guanzhuang	China_AR_EN	Mbuti	0.30656	0.003358	91.285	151328		Guanzhuang_o	Kazakhstan_Nomad_HP.SG	Mbuti	0.297716	0.007589	39.229	13506
Guanzhuang	China_SEastAsia_Coastal_Historic	Mbuti	0.306533	0.003858	79.453	106749		Guanzhuang_o	Russia_UstBelaya_Angara.SG	Mbuti	0.297703	0.008708	34.186	11311
Guanzhuang	Russia_KuengaRiver_N_1.SG	Mbuti	0.306484	0.005515	55.578	34926		Guanzhuang_o	Russia_ArgunRiver_M.SG	Mbuti	0.297641	0.008194	36.323	13560
Guanzhuang	Mongolia_Tuv_Xiongnu	Mbuti	0.306384	0.002948	103.92	433896		Guanzhuang_o	Russia_Shamanka_Eneolithic.SG	Mbuti	0.297523	0.006301	47.216	14743
Guanzhuang	Russia_LenaRiver_EN.SG	Mbuti	0.30635	0.003046	100.57	437692		Guanzhuang_o	Dungan.SG	Mbuti	0.297297	0.007129	41.701	14054
Guanzhuang	Mongolia_Dornod_PreBronze	Mbuti	0.306244	0.004268	71.762	73713		Guanzhuang_o	Ulchi.DG	Mbuti	0.297207	0.006827	43.535	13927
Guanzhuang	China_Lahu.DG	Mbuti	0.306177	0.002776	110.286	526617		Guanzhuang_o	Russia_Lokomotiv_Eneolithic.SG	Mbuti	0.297171	0.007755	38.319	12404
Guanzhuang	Tonga_2500BP	Mbuti	0.306118	0.004046	75.666	86448		Guanzhuang_o	Nepal_Samdzong_1500BP.SG	Mbuti	0.297071	0.006783	43.8	14205
Guanzhuang	GaoHuaHua	Mbuti	0.306094	0.002818	108.617	422534		Guanzhuang_o	GaoHuaHua	Mbuti	0.296967	0.008644	34.355	10699
Guanzhuang	Nepal_Mebrak_2125BP.SG	Mbuti	0.306075	0.003022	101.274	331110		Guanzhuang_o	Tibetan.DG	Mbuti	0.296569	0.006911	42.91	13933
Guanzhuang	Russia_KuengaRiver_N_2.SG	Mbuti	0.306027	0.002989	102.387	470065		Guanzhuang_o	Hawaiian.DG	Mbuti	0.296308	0.007307	40.553	13561
Guanzhuang	Oroqen.DG	Mbuti	0.306001	0.0027	113.331	527420		Guanzhuang_o	KHV_o.SG	Mbuti	0.296123	0.006703	44.178	14416
Guanzhuang	Russia_ArgunRiver_M.SG	Mbuti	0.305983	0.003074	99.542	516857		Guanzhuang_o	Russia_Yana_Medieval.SG	Mbuti	0.295762	0.009799	30.183	10694
Guanzhuang	Taiwan_Hanben_IA_lc	Mbuti	0.305746	0.005768	53.01	27840		Guanzhuang_o	Mongolia_Bulgan_EarlyMedievalLatEMedieval	Mbuti	0.295613	0.007193	41.099	13134
Guanzhuang	Mongolia_Arkhangai_Xiongnu_o	Mbuti	0.305702	0.002972	102.872	405257		Guanzhuang_o	Mongolia_Sukhbaatar_MLBAXiongnuLatEMedieval	Mbuti	0.295467	0.006901	42.815	13692
Guanzhuang	Russia_MN_Boisman_1d.rel.I1206	Mbuti	0.3056	0.004105	74.449	75302		Guanzhuang_o	Nepal_Chokhopani_2800BP.SG	Mbuti	0.29528	0.008433	35.014	13779
Guanzhuang	Shandong_EN	Mbuti	0.305587	0.002851	107.198	401469		Guanzhuang_o	Russia_KuengaRiver_N_2.SG	Mbuti	0.295276	0.008724	33.848	12312
Guanzhuang	Taiwan_Gongguan	Mbuti	0.305586	0.003072	99.467	248096		Guanzhuang_o	Koryak.SG	Mbuti	0.295236	0.007227	40.853	14053
Guanzhuang	Russia_IA_Yankovsky	Mbuti	0.305531	0.003143	97.199	242363		Guanzhuang_o	Burmese.DG	Mbuti	0.294659	0.006609	44.587	13987
Guanzhuang	Sherpa.DG	Mbuti	0.305484	0.002766	110.434	527033		Guanzhuang_o	RIA.SG	Mbuti	0.294421	0.006351	46.358	14812
Guanzhuang	China_AR_Xianbei_IA	Mbuti	0.305303	0.003658	83.464	122763		Guanzhuang_o	Buryat.SG	Mbuti	0.294385	0.006777	43.441	14446
Guanzhuang	Ulchi.DG	Mbuti	0.305254	0.002778	109.866	527538		Guanzhuang_o	Russia_LakeBaikal_N.SG	Mbuti	0.29433	0.007634	38.553	14031
Guanzhuang	Mongolia_LBA_CenterWest_4_o	Mbuti	0.305249	0.003058	99.818	308387		Guanzhuang_o	Even.DG	Mbuti	0.294317	0.007076	41.593	13909
Guanzhuang	Russia_MN_Boisman	Mbuti	0.305017	0.002712	112.478	434625		Guanzhuang_o	Dusun.DG	Mbuti	0.294158	0.006894	42.666	13856
Guanzhuang	Vietnam_historical.SG	Mbuti	0.304994	0.003756	81.208	116339		Guanzhuang_o	Mongolia_Sukhbaatar_LatEMedieval	Mbuti	0.293856	0.006569	44.733	14238
Guanzhuang	Malaysia_historical.WGC	Mbuti	0.304897	0.003957	77.05	86113		Guanzhuang_o	Mongolia_Umungobi_LatEMedieval	Mbuti	0.293412	0.007851	37.375	12122
Guanzhuang	Mongolia_Sukhbaatar_MLBA	Mbuti	0.304877	0.003247	93.893	239403		Guanzhuang_o	Kalmyk.SG	Mbuti	0.293196	0.00745	39.354	14047
Guanzhuang	Nepal_Mebrak_2125BP_o.SG	Mbuti	0.304809	0.006287	48.486	22018		Guanzhuang_o	Yakut.DG	Mbuti	0.29304	0.006697	43.759	13915
Guanzhuang	Russia_AginBuryat_N.SG	Mbuti	0.304681	0.003362	90.615	178158		Guanzhuang_o	Russia_Shamanka_EBA.SG	Mbuti	0.292777	0.008111	36.095	12944
Guanzhuang	Philippines_RedSlippedPottery.WGC	Mbuti	0.304568	0.00986	30.889	9410		Guanzhuang_o	Mongolia_Uvurkhangai_Xiongnu	Mbuti	0.29267	0.008551	34.227	11046
Guanzhuang	Laos_Unknown.SG	Mbuti	0.304442	0.005386	56.521	39932		Guanzhuang_o	Kazakhstan_GoldenHordeAsian.SG	Mbuti	0.292375	0.00855	34.196	13050
Guanzhuang	Russia_MN_Boisman_published	Mbuti	0.304087	0.003445	88.279	155053		Guanzhuang_o	Russia_UstBelaya_Angara_dup.I7782.SG	Mbuti	0.291922	0.009101	32.077	11772
Guanzhuang	Mongolia_LBA_Ulaanzukh_2_dup.I14037	Mbuti	0.304078	0.002994	101.552	339687		Guanzhuang_o	Russia_UstBelaya_Angara	Mbuti	0.291773	0.007552	38.636	12734
Guanzhuang	Mongolia_East_N	Mbuti	0.303996	0.002896	104.97	415238		Guanzhuang_o	Thai.DG	Mbuti	0.291631	0.006483	44.986	13959
Guanzhuang	Dungan.SG	Mbuti	0.303911	0.002869	105.922	534039		Guanzhuang_o	Russia_AngaraRiver_EN.SG	Mbuti	0.291129	0.008615	33.794	13020
Guanzhuang	Mongolia_Bulgan_LatEMedieval	Mbuti	0.303906	0.003012	100.909	333181		Guanzhuang_o	Mongolia_Dornod_LatEMedieval	Mbuti	0.291006	0.007524	38.679	13138
Guanzhuang	Mongolia_Dornod_Xiongnu	Mbuti	0.303899	0.003022	100.579	396075		Guanzhuang_o	Russia_LenaRiver_BA.SG	Mbuti	0.290794	0.007357	39.525	14093
Guanzhuang	Mongolia_Khentii_Xiongnu	Mbuti	0.303738	0.002957	102.728	373251		Guanzhuang_o	Mongolia_Selenge_LatEMedieval	Mbuti	0.290745	0.007688	37.818	12208
Guanzhuang	Dusun.DG	Mbuti	0.303469	0.002807	108.106	526363		Guanzhuang_o	Russia_Buryatia_Xiongnu	Mbuti	0.290424	0.008025	36.19	12258
Guanzhuang	Mongolia_Khovd_MLBAXiongnuLatEMedieval	Mbuti	0.303465	0.003231	93.913	210610		Guanzhuang_o	USA_AK_Ancient_Athabaskan_1100BP	Mbuti	0.290287	0.008583	33.819	11513
Guanzhuang	Taiwan_Liangdao_LatePaleolithic.SG	Mbuti	0.303443	0.004136	73.364	69013		Guanzhuang_o	Brazil_Botocudo.SG	Mbuti	0.289971	0.008308	34.905	12575
Guanzhuang	Vietnam_BA	Mbuti	0.30344	0.003583	84.697	117699		Guanzhuang_o	Russia_KolymaRiver_LN.SG	Mbuti	0.289891	0.007516	38.569	14114
Guanzhuang	Tu.DG	Mbuti	0.30322	0.002683	113.004	528792		Guanzhuang_o	Russia_Kolyma_M.SG	Mbuti	0.289784	0.008319	34.836	13808
Guanzhuang	Mongolia_Sukhbaatar_MLBAXiongnuLatEMedieval	Mbuti	0.303203	0.00262	115.71	527337		Guanzhuang_o	Mongolia_EIA_SlabGrave_1	Mbuti	0.289738	0.006977	41.526	13231
Guanzhuang	Russia_Lokomotiv_Eneolithic.SG	Mbuti	0.303031	0.002783	108.903	471388		Guanzhuang_o	Laos_LN_BA.SG	Mbuti	0.289693	0.009075	31.923	10274
Guanzhuang	Mongolia_Dundgobi_LatEMedieval	Mbuti	0.302876	0.003058	99.043	332606		Guanzhuang_o	Mongolia_Uvurkhangai_EIALatEMedieval	Mbuti	0.289499	0.009179	31.541	10129
Guanzhuang	Mongolia_Sukhbaatar_LatEMedieval	Mbuti	0.302863	0.002635	114.93	542257		Guanzhuang_o	Kazakhstan_Berel_IA_o3	Mbuti	0.289244	0.007438	38.889	12891
Guanzhuang	Mongolia_Uvurkhangai_Xiongnu	Mbuti	0.302856	0.002875	105.356	439309		Guanzhuang_o	Cambodian.DG	Mbuti	0.289159	0.006529	44.287	13942
Guanzhuang	Mongolia_EIA_8	Mbuti	0.302774	0.002976	101.737	298906		Guanzhuang_o	Mongolia_Bulgan_Xiongnu	Mbuti	0.288778	0.008652	33.378	10619
Guanzhuang	Russia_UstBelaya_Angara_o.SG	Mbuti	0.302626	0.003238	93.474	240346		Guanzhuang_o	Yukpa.SG	Mbuti	0.288775	0.008662	33.337	13836
Guanzhuang	KHV_o.SG	Mbuti	0.302576	0.002654	114.02	544350		Guanzhuang_o	Russia_AngaraRiver_N.SG	Mbuti	0.288712	0.007128	40.502	14163
Guanzhuang	Nepal_Samdzong_1500BP.SG	Mbuti	0.302478	0.002675	113.096	538729		Guanzhuang_o	Russia_Magadan_BA_dup.I11280.SG	Mbuti	0.288533	0.009561	30.178	10380
Guanzhuang	Taiwan_Hanben_IA_1d.rel.I3735	Mbuti	0.30234	0.004719	64.066	49972		Guanzhuang_o	USA_Nevada_LovelockCave_600BP.SG	Mbuti	0.287966	0.008223	35.02	13784
Guanzhuang	Tibetan.DG	Mbuti	0.302203	0.002732	110.627	527725		Guanzhuang_o	SSG_BA3	Mbuti	0.287828	0.008542	33.694	13638
Guanzhuang	Russia_Shamanka_Eneolithic.SG	Mbuti	0.302167	0.002663	113.465	554589		Guanzhuang_o	Bahamas_Taino.SG	Mbuti	0.287324	0.008553	33.595	13808
Guanzhuang	China_AmurRiver_EarlyN	Mbuti	0.302131	0.002968	101.799	285345		Guanzhuang_o	Peru_RioUncallane_1600BP.SG	Mbuti	0.287305	0.006918	41.533	14206
Guanzhuang	Mongolia_EIA_SlabGrave_1	Mbuti	0.301813	0.002632	114.653	517137		Guanzhuang_o	Surui.DG	Mbuti	0.287028	0.007489	38.326	13774
Guanzhuang	BaBanQinCen	Mbuti	0.301679	0.002854	105.689	281724		Guanzhuang_o	Mongolia_Khentii_LatEMedieval	Mbuti	0.28701	0.008865	32.376	10333
Guanzhuang	Mongolia_Khentii_EIA_SlabGrave	Mbuti	0.301509	0.004983	60.509	50024		Guanzhuang_o	USA_CA_LSCI.SG	Mbuti	0.286496	0.007232	39.612	14045
Guanzhuang	Mongolia_LBA_Ulaanzukh_2	Mbuti	0.301479	0.002769	108.884	367320		Guanzhuang_o	Russia_Siberia_Irkutsk_EBA	Mbuti	0.286313	0.00882	32.462	10399
Guanzhuang	Russia_UstBelaya_Angara_o_published	Mbuti	0.301328	0.00385	78.264	99702		Guanzhuang_o	Mongolia_North_N	Mbuti	0.286271	0.007819	36.61	11621
Guanzhuang	Vanuatu_2900BP_all	Mbuti	0.301186	0.00431	69.886	74298		Guanzhuang_o	Russia_LenaRiver_N.SG	Mbuti	0.285564	0.007269	39.286	14045
Guanzhuang	Vanuatu_3000BP	Mbuti	0.300994	0.005026	59.891	44956		Guanzhuang_o	Russia_UstIda_LN.SG	Mbuti	0.285558	0.007796	36.627	13019
Guanzhuang	Thailand_IA.WGC	Mbuti	0.300789	0.004894	61.462	50047		Guanzhuang_o	Brazil_Sumidouro_10100BP.SG	Mbuti	0.285476	0.007005	40.755	14202
Guanzhuang	Mongolia_Tuv_LatEMedieval	Mbuti	0.3007	0.002752	109.26	423210		Guanzhuang_o	Itelmen.DG	Mbuti	0.285428	0.00758	37.655	13586
Guanzhuang	Russia_Siberia_Lena_EBA_dup.KPT002_petrous	Mbuti	0.300555	0.007798	38.541	14342		Guanzhuang_o	USA_AK_PaleoAleut.SG	Mbuti	0.28538	0.009188	31.06	11831
Guanzhuang	Kazakhstan_GoldenHordeAsian.SG	Mbuti	0.300554	0.003066	98.028	497358		Guanzhuang_o	Altaian.DG	Mbuti	0.285317	0.007108	40.141	13570
Guanzhuang	Guam_LateUnai_Ritidian	Mbuti	0.300496	0.004856	61.877	45642		Guanzhuang_o	USA_AK_Ancient_Athabaskan_1100BP.DG	Mbuti	0.285178	0.007665	37.206	13832
Guanzhuang	Suogang	Mbuti	0.300486	0.006418	46.819	19622		Guanzhuang_o	USA_CA_Chumash.SG	Mbuti	0.28491	0.008798	32.383	10829
Guanzhuang	China_AmurRiver_N	Mbuti	0.300478	0.002828	106.239	337991		Guanzhuang_o	Russia_AngaraRiver_BA.SG	Mbuti	0.284885	0.00695	40.993	14273
Guanzhuang	Vietnam_BA_all	Mbuti	0.300345	0.003378	88.903	175648		Guanzhuang_o	Peru_Chincha_LH.SG	Mbuti	0.28486	0.006825	41.736	14390
Guanzhuang	Russia_KolymaRiver_LN.SG	Mbuti	0.300334	0.002712	110.729	535975		Guanzhuang_o	Peru_Chincha_LH	Mbuti	0.284737	0.006851	41.561	14395
Guanzhuang	Russia_DevilsCave_N_sister.NEO236.mother.NEO238_dup1.NEO237.SG	Mbuti	0.300253	0.005512	54.473	35327		Guanzhuang_o	Altaian_o.SG	Mbuti	0.284612	0.008671	32.822	13849
Guanzhuang	Even.DG	Mbuti	0.300032	0.002721	110.274	527738		Guanzhuang_o	Mixe.DG	Mbuti	0.284506	0.006818	41.727	14003
Guanzhuang	Shenxian	Mbuti	0.299781	0.003047	98.395	239387		Guanzhuang_o	Russia_Ekven_OldBeringSea	Mbuti	0.283836	0.006887	41.211	14014
Guanzhuang	Russia_Buryatia_Xiongnu_mother.IMA005	Mbuti	0.299775	0.003032	98.866	291994		Guanzhuang_o	Mongolia_Dornod_LatEMedieval_o	Mbuti	0.283769	0.009142	31.04	10603
Guanzhuang	Mongolia_North_N	Mbuti	0.299736	0.00271	110.587	467891		Guanzhuang_o	USA_Nevada_LovelockCave_1850BP.SG	Mbuti	0.283717	0.00749	37.878	14091
Guanzhuang	Mongolia_Khentii_Xiongnu_daughter.JAG001	Mbuti	0.299708	0.003171	94.517	245052		Guanzhuang_o	Huichol.SG	Mbuti	0.283463	0.008167	34.707	13833
Guanzhuang	Kazakhstan_Korgantas_IA	Mbuti	0.299673	0.00308	97.311	377463		Guanzhuang_o	Mongolia_Uvs_EIAXiongnuLateMedival_o	Mbuti	0.283369	0.008294	34.164	11635
Guanzhuang	Tonga_2700BP	Mbuti	0.299629	0.004397	68.143	64597		Guanzhuang_o	StLucia_Lavoutte_Ceramic	Mbuti	0.283356	0.006916	40.971	13619
Guanzhuang	Mongolia_Arkhangai_MLBAtoEIAorMedieval_o	Mbuti	0.299618	0.004145	72.282	80447		Guanzhuang_o	Mongolia_East_N	Mbuti	0.283286	0.00842	33.646	10179
Guanzhuang	Kazakhstan_Nomad_Hun_Sarmatian.SG	Mbuti	0.299592	0.002994	100.071	449795		Guanzhuang_o	USA_AK_Ancient_Athabaskan_1100BP.SG	Mbuti	0.283229	0.008404	33.701	13769
Guanzhuang	RIA.SG	Mbuti	0.299491	0.002566	116.724	557230		Guanzhuang_o	Mongolia_Tuv_LatEMedieval	Mbuti	0.283174	0.008268	34.249	10470
Guanzhuang	Mongolia_North_N_mother.I23394	Mbuti	0.299461	0.003059	97.9	285052		Guanzhuang_o	USA_Nevada_SpiritCave_11000BP.SG	Mbuti	0.282947	0.008134	34.785	13852
Guanzhuang	Russia_CentralYakutia_LN.SG	Mbuti	0.29942	0.002929	102.211	511590		Guanzhuang_o	Peru_RioUncallane_1600BP_o.SG	Mbuti	0.28288	0.009774	28.942	10017
Guanzhuang	Mongolia_Sukhbaatar_MLBAXiongnuLatEMedieval_sister.ULN001	Mbuti	0.299372	0.006255	47.858	24619		Guanzhuang_o	Chipewyan.DG	Mbuti	0.282875	0.006887	41.072	13860
Guanzhuang	Mongolia_Bulgan_Xiongnu	Mbuti	0.299312	0.002743	109.135	423494		Guanzhuang_o	Malaysia_LN.SG	Mbuti	0.282853	0.009488	29.813	10987
Guanzhuang	LaCen	Mbuti	0.299309	0.002947	101.549	319437		Guanzhuang_o	Mongolia_Arkhangai_LatEMedieval	Mbuti	0.282557	0.008253	34.235	12062
Guanzhuang	Koryak.SG	Mbuti	0.29929	0.002787	107.383	533550		Guanzhuang_o	Mongolia_MBA_Munkhkhairkhan_1	Mbuti	0.282464	0.008831	31.985	10540
Guanzhuang	Thai.DG	Mbuti	0.29927	0.002727	109.747	528702		Guanzhuang_o	Piapoco.DG	Mbuti	0.282459	0.00704	40.12	13864
Guanzhuang	Russia_Buryatia_PreBronze	Mbuti	0.299242	0.002949	101.482	345042		Guanzhuang_o	Bahamas_EleutheraIsl_Ceramic	Mbuti	0.282399	0.008343	33.849	11389
Guanzhuang	Mongolia_Uvurkhangai_EIALatEMedieval	Mbuti	0.299223	0.002879	103.943	415554		Guanzhuang_o	Argentina_NorthTierradelFuego_Selknam_500BP	Mbuti	0.282387	0.00904	31.238	10028
Guanzhuang	Tanshishan	Mbuti	0.299182	0.00339	88.263	134533		Guanzhuang_o	Mongolia_LBA_Khovsgol_6	Mbuti	0.282332	0.006597	42.796	13702
Guanzhuang	Taiwan_Hanben_IA_1d.rel.I8072	Mbuti	0.299154	0.008193	36.514	12373		Guanzhuang_o	Pima.DG	Mbuti	0.281982	0.006868	41.057	13851
Guanzhuang	Yiyang	Mbuti	0.299139	0.003846	77.777	92825		Guanzhuang_o	PuertoRico_SantaElena_Ceramic	Mbuti	0.281957	0.008828	31.94	10377
Guanzhuang	Russia_KolymaRiver_LN_1d.rel.yak024.SG	Mbuti	0.299116	0.003318	90.149	191973		Guanzhuang_o	Peru_LIP_Botigiriayocc_600BP	Mbuti	0.281775	0.009405	29.959	11273
Guanzhuang	Russia_Buryatia_Xiongnu	Mbuti	0.2991	0.002668	112.1	482156		Guanzhuang_o	Panama_IsthmoColombian_PreColonial.SG	Mbuti	0.281695	0.008911	31.613	10618
Guanzhuang	China_AmurRiver_Mesolithic	Mbuti	0.298878	0.002909	102.731	258544		Guanzhuang_o	Even_o.DG	Mbuti	0.281356	0.007361	38.225	13603
Guanzhuang	Russia_Krasnoyarsk_BA.SG	Mbuti	0.298758	0.003003	99.497	526155		Guanzhuang_o	USA_CA_Late_SanNicolas.SG	Mbuti	0.280994	0.007285	38.569	13759
Guanzhuang	Vanuatu_2900BP	Mbuti	0.298721	0.004869	61.352	50250		Guanzhuang_o	Mongolia_Khovd_LatEMedieval	Mbuti	0.280837	0.008938	31.42	10080
Guanzhuang	Burmese.DG	Mbuti	0.298691	0.002561	116.64	529239		Guanzhuang_o	Mongolia_LBA_CenterWest_4	Mbuti	0.280775	0.006943	40.44	12531
Guanzhuang	Russia_LenaRiver_MiddleN.SG	Mbuti	0.298624	0.003138	95.156	231347		Guanzhuang_o	Argentina_Aconcagua_Inca_500BP.SG	Mbuti	0.280348	0.008835	31.732	11908
Guanzhuang	Thailand_IA.SG	Mbuti	0.29854	0.002973	100.402	276316		Guanzhuang_o	Karitiana.DG	Mbuti	0.27988	0.007012	39.914	13907
Guanzhuang	Mongolia_Arkhangai_PreBronze	Mbuti	0.298455	0.003028	98.577	314994		Guanzhuang_o	PEL_oEastAsian.SG	Mbuti	0.279754	0.008329	33.588	13768
Guanzhuang	Russia_UstBelaya_Angara.SG	Mbuti	0.298334	0.003002	99.365	430129		Guanzhuang_o	Peru_Laramate_900BP	Mbuti	0.279421	0.008242	33.901	10522
Guanzhuang	Kazakhstan_Nomad_HP.SG	Mbuti	0.298133	0.002835	105.179	513874		Guanzhuang_o	Russia_Siberia_Lena_EBA	Mbuti	0.278956	0.007367	37.867	13156
Guanzhuang	Buryat.SG	Mbuti	0.298126	0.002625	113.561	545423		Guanzhuang_o	Kazakhstan_Birlik_Tasmola_EIA	Mbuti	0.278928	0.009323	29.919	10213
Guanzhuang	Vietnam_BA_DongSonCulture.SG	Mbuti	0.298032	0.003216	92.683	177863		Guanzhuang_o	USA_CA_Early_SanNicolas.SG	Mbuti	0.278869	0.007509	37.14	13802
Guanzhuang	Russia_AngaraRiver_EN.SG	Mbuti	0.297867	0.002992	99.555	496687		Guanzhuang_o	Mayan.DG	Mbuti	0.278797	0.006851	40.692	13887
Guanzhuang	Xitoucun	Mbuti	0.297817	0.003114	95.641	199719		Guanzhuang_o	USA_Anzick_realigned.SG	Mbuti	0.278656	0.008361	33.329	13501
Guanzhuang	Canada_MDorset_published	Mbuti	0.297746	0.005345	55.704	40518		Guanzhuang_o	Haiti_Diale1_Ceramic	Mbuti	0.27847	0.008772	31.745	11273
Guanzhuang	Mongolia_Khuvsgul_LatEMedieval	Mbuti	0.297732	0.003033	98.166	351405		Guanzhuang_o	Bahamas_SouthAndros_Ceramic.SG	Mbuti	0.278353	0.006843	40.68	14380
Guanzhuang	Mongolia_EIA_Xiongnu_7	Mbuti	0.297613	0.003118	95.454	297537		Guanzhuang_o	Karitiana.SG	Mbuti	0.278191	0.008027	34.657	13795
Guanzhuang	Mongolia_Bulgan_EarlyMedievalLatEMedieval	Mbuti	0.297596	0.002638	112.791	507977		Guanzhuang_o	Quechua.DG	Mbuti	0.278107	0.006841	40.651	13899
Guanzhuang	Yakut.DG	Mbuti	0.297585	0.002816	105.694	528658		Guanzhuang_o	Peru_Lauricocha_8600BP	Mbuti	0.278059	0.008512	32.668	11032
Guanzhuang	Russia_Siberia_Irkutsk_EBA	Mbuti	0.297556	0.002789	106.677	415308		Guanzhuang_o	Russia_Uelen_OldBeringSea	Mbuti	0.277913	0.00827	33.606	11512
Guanzhuang	Mongolia_Dornod_LatEMedieval	Mbuti	0.297494	0.002651	112.227	507956		Guanzhuang_o	USA_AK_PaleoAleut	Mbuti	0.277686	0.00932	29.793	10121
Guanzhuang	Kazakhstan_Berel_IA_o3	Mbuti	0.297488	0.002731	108.933	501854		Guanzhuang_o	Mixtec_1.DG	Mbuti	0.277672	0.007532	36.867	13604
Guanzhuang	Hawaiian.DG	Mbuti	0.29747	0.002984	99.694	516362		Guanzhuang_o	Russia_Karasuk_o1.SG	Mbuti	0.277658	0.008624	32.196	13407
Guanzhuang	Tonga_800BP	Mbuti	0.297402	0.010337	28.77	8377		Guanzhuang_o	USA_CA_SanCruz_IslandChumash.SG	Mbuti	0.277584	0.008264	33.591	12877
Guanzhuang	Vietnam_LN.SG	Mbuti	0.2974	0.003114	95.517	170283		Guanzhuang_o	Kusunda.DG	Mbuti	0.277374	0.006837	40.569	13896
Guanzhuang	Mongolia_Ulaanbaatar_EIALatEMedieval	Mbuti	0.297285	0.003245	91.602	196070		Guanzhuang_o	Russia_Ekven_OldBeringSea_dup.I7341.SG	Mbuti	0.277166	0.009101	30.455	10780
Guanzhuang	China_AmurRiver_LPaleolithic	Mbuti	0.297168	0.002877	103.285	350160		Guanzhuang_o	Chane.DG	Mbuti	0.277027	0.007741	35.785	13588
Guanzhuang	Mongolia_Bulgan_EarlyMedieval	Mbuti	0.297099	0.002966	100.176	360479		Guanzhuang_o	Peru_RioUncallane_1800BP.SG	Mbuti	0.276556	0.008339	33.163	13767
Guanzhuang	Thailand_BA_all	Mbuti	0.29709	0.008453	35.146	12101		Guanzhuang_o	Russia_UstIda_EBA.SG	Mbuti	0.276357	0.009005	30.688	10492
Guanzhuang	Yumin	Mbuti	0.296762	0.003124	94.993	323211		Guanzhuang_o	Peru_Lima_LIP_650BP	Mbuti	0.276337	0.009278	29.784	10256
Guanzhuang	Russia_Shamanka_EBA.SG	Mbuti	0.296739	0.002787	106.464	490016		Guanzhuang_o	Bahamas_AbacoIsl_Ceramic	Mbuti	0.276221	0.008657	31.906	10086
Guanzhuang	Russia_Shamanka_EBA.SG_brother.DA336.SG	Mbuti	0.296383	0.003369	87.979	155146		Guanzhuang_o	Altaian.SG	Mbuti	0.276063	0.008537	32.339	13801
Guanzhuang	Russia_Magadan_BA_dup.I11278.SG	Mbuti	0.296317	0.003164	93.644	285303		Guanzhuang_o	Mongolia_Khuvsgul_XiongnuLatEMedieval_2	Mbuti	0.275827	0.00761	36.245	12456
Guanzhuang	Tonga_2500BP_contam	Mbuti	0.296252	0.006781	43.686	22808		Guanzhuang_o	Mongolia_Sukhbaatar_XiongnuLatEMedieval	Mbuti	0.27578	0.008767	31.456	10922
Guanzhuang	Mongolia_Umungobi_LatEMedieval	Mbuti	0.296219	0.002671	110.922	478751		Guanzhuang_o	Malaysia_Jehai_dup.JHM06.SG	Mbuti	0.275738	0.008291	33.256	13805
Guanzhuang	Mongolia_Khentii_LatEMedieval	Mbuti	0.296211	0.002864	103.413	417763		Guanzhuang_o	DTLD_IA2	Mbuti	0.275636	0.009193	29.984	11411
Guanzhuang	Russia_AngaraRiver_BA.SG	Mbuti	0.296162	0.002758	107.398	541440		Guanzhuang_o	Quechua_oEuropean.DG	Mbuti	0.275588	0.007365	37.417	13591
Guanzhuang	Russia_UstBelaya_EBA.SG	Mbuti	0.296122	0.00334	88.667	220893		Guanzhuang_o	USA_AK_Ancient_Athabaskan_1100BP_father.or.son.I5319	Mbuti	0.27529	0.009465	29.086	10015
Guanzhuang	Itelmen.DG	Mbuti	0.295779	0.002962	99.861	517316		Guanzhuang_o	Mexico_Zapotec.DG	Mbuti	0.275023	0.006674	41.209	13892
Guanzhuang	Mongolia_EIA_3	Mbuti	0.295751	0.003123	94.709	279382		Guanzhuang_o	Mongolia_EBA_Ulgii_1	Mbuti	0.2749	0.008167	33.659	10634
Guanzhuang	Mongolia_Selenge_XiongnuMedieval_o1	Mbuti	0.295653	0.003628	81.498	118815		Guanzhuang_o	Mongolia_Arkhangai_XiongnuEarlyMedieval_3	Mbuti	0.274888	0.00717	38.34	13834
Guanzhuang	Russia_Siberia_Lena_EN	Mbuti	0.29562	0.002898	102.002	389188		Guanzhuang_o	PuertoRico_PasodelIndio_Ceramic	Mbuti	0.274578	0.007816	35.129	12316
Guanzhuang	Kalmyk.SG	Mbuti	0.295585	0.002695	109.697	535119		Guanzhuang_o	Canada_ASO.SG	Mbuti	0.274347	0.009132	30.043	10567
Guanzhuang	Mongolia_IA_Xianbei	Mbuti	0.295426	0.00322	91.738	306452		Guanzhuang_o	Japan_Jomon.SG	Mbuti	0.274308	0.009322	29.425	10827
Guanzhuang	Russia_UstBelaya_Angara_dup.I7782.SG	Mbuti	0.29542	0.003032	97.421	452377		Guanzhuang_o	Mayan.SG	Mbuti	0.274011	0.008324	32.918	13814
Guanzhuang	Russia_LakeBaikal_N.SG	Mbuti	0.295352	0.002776	106.395	533290		Guanzhuang_o	Teleut.SG	Mbuti	0.273843	0.00706	38.789	14105
Guanzhuang	Russia_UstBelaya_Angara	Mbuti	0.295349	0.002681	110.161	499191		Guanzhuang_o	USA_Ancient_Beringian.SG	Mbuti	0.273598	0.008104	33.76	13861
Guanzhuang	Kazakhstan_Kayalyk_Medieval	Mbuti	0.295119	0.003245	90.933	194373		Guanzhuang_o	Kazakhstan_Medieval_Nomad.SG	Mbuti	0.273417	0.007935	34.457	12561
Guanzhuang	Panama_IsthmoColombian_Colonial_oNativeAmerican_lc.SG	Mbuti	0.294962	0.011178	26.388	6789		Guanzhuang_o	USA_CA_SanMiguel_IslandChumash.SG	Mbuti	0.273379	0.008873	30.811	11448
Guanzhuang	Laos_LN_BA.SG	Mbuti	0.294812	0.002964	99.47	389320		Guanzhuang_o	Kazakhstan_Kipchak2.SG	Mbuti	0.273263	0.009383	29.122	11311
Guanzhuang	Russia_LenaRiver_BA.SG	Mbuti	0.29463	0.002807	104.98	535494		Guanzhuang_o	Bahamas_SouthAndros_Ceramic	Mbuti	0.273065	0.008694	31.408	10402
Guanzhuang	Russia_AngaraRiver_N.SG	Mbuti	0.294573	0.002728	107.998	537337		Guanzhuang_o	Mongolia_Arkhangai_EarlyMedieval_o	Mbuti	0.273061	0.007194	37.958	12948
Guanzhuang	Russia_UstBelaya_Angara_published	Mbuti	0.294505	0.00293	100.503	327597		Guanzhuang_o	Cree2.DG	Mbuti	0.272784	0.007535	36.2	13649
Guanzhuang	Laos_BA.WGC	Mbuti	0.294433	0.003609	81.573	165136		Guanzhuang_o	Aymara.SG	Mbuti	0.272757	0.008096	33.691	13809
Guanzhuang	Cambodian.DG	Mbuti	0.294369	0.002761	106.622	528714		Guanzhuang_o	Tsimshian.SG	Mbuti	0.272686	0.008709	31.312	13800
Guanzhuang	Russia_Yana_Medieval.SG	Mbuti	0.29434	0.00296	99.432	410422		Guanzhuang_o	Tubalar.DG	Mbuti	0.272392	0.006629	41.09	13984
Guanzhuang	Malaysia_LN.SG	Mbuti	0.294338	0.002951	99.754	416230		Guanzhuang_o	Nahua.DG	Mbuti	0.271783	0.007288	37.293	13592
Guanzhuang	Russia_Ekven_OldBeringSea_dup.I7349.SG	Mbuti	0.294309	0.003016	97.584	350788		Guanzhuang_o	Mongolia_Selenge_XiongnuLatEMedieval	Mbuti	0.271215	0.008807	30.797	10927
Guanzhuang	Liangdao2	Mbuti	0.293915	0.002978	98.712	353945		Guanzhuang_o	Karakalpak.SG	Mbuti	0.271073	0.006391	42.412	14362
Guanzhuang	Vanuatu_2900BP_contam_all	Mbuti	0.29379	0.003913	75.087	92280		Guanzhuang_o	Kazakh.SG	Mbuti	0.270831	0.006694	40.459	14393
Guanzhuang	Russia_Kurma_EBA.SG	Mbuti	0.293772	0.003031	96.91	317473		Guanzhuang_o	Malaysia_Jehai.SG	Mbuti	0.270735	0.008433	32.106	13819
Guanzhuang	Russia_LakeBaikal_BA.SG	Mbuti	0.293692	0.005829	50.386	30366		Guanzhuang_o	Xinj_U_IA	Mbuti	0.270026	0.008916	30.285	12082
Guanzhuang	China_AmurRiver_BA	Mbuti	0.293627	0.011551	25.42	6594		Guanzhuang_o	PEL.SG	Mbuti	0.269455	0.005871	45.894	15752
Guanzhuang	Thailand_BA	Mbuti	0.293457	0.006553	44.784	19901		Guanzhuang_o	Aleut.DG	Mbuti	0.26801	0.006559	40.862	14018
Guanzhuang	Russia_Karasuk_o1.SG	Mbuti	0.293292	0.002902	101.08	515044		Guanzhuang_o	Mongolia_Khuvsgul_MLBALatEMedieval	Mbuti	0.268007	0.008281	32.364	10630
Guanzhuang	Mongolia_Chalcolithic_Afanasievo_2	Mbuti	0.293163	0.002985	98.197	268384		Guanzhuang_o	Hazara.SDG	Mbuti	0.26716	0.005653	47.263	15635
Guanzhuang	Mongolia_Selenge_LatEMedieval	Mbuti	0.292991	0.002708	108.198	482925		Guanzhuang_o	Russia_BA_Okunevo.SG	Mbuti	0.266833	0.006366	41.918	14746
Guanzhuang	India_RoopkundC	Mbuti	0.292774	0.003478	84.178	153722		Guanzhuang_o	Uyghur.SG	Mbuti	0.26667	0.006397	41.687	14359
Guanzhuang	Even_o.DG	Mbuti	0.292642	0.003068	95.371	518966		Guanzhuang_o	Uyghur.SDG	Mbuti	0.266112	0.005654	47.07	15545
Guanzhuang	Russia_Kurma_EBA_o.SG	Mbuti	0.292626	0.00399	73.345	78273		Guanzhuang_o	Mongolia_EBA_Ulgii_1_dup.I6361	Mbuti	0.266096	0.009724	27.364	10121
Guanzhuang	Vietnam_N_published	Mbuti	0.292625	0.005574	52.5	32883		Guanzhuang_o	Cree1.DG	Mbuti	0.265152	0.007023	37.757	13658
Guanzhuang	Peru_LH_Inca	Mbuti	0.292463	0.004217	69.347	79811		Guanzhuang_o	Hazara.SG	Mbuti	0.264466	0.006423	41.175	14388
Guanzhuang	Mongolia_Khovd_LatEMedieval	Mbuti	0.292438	0.002773	105.471	406179		Guanzhuang_o	Mansi.DG	Mbuti	0.263824	0.006573	40.14	14097
Guanzhuang	USA_AK_PaleoAleut.SG	Mbuti	0.292432	0.00295	99.127	460874		Guanzhuang_o	Uyghur.DG	Mbuti	0.263267	0.006439	40.889	14039
Guanzhuang	Indonesia_LN_BA_IA.WGC	Mbuti	0.292197	0.005862	49.849	26274		Guanzhuang_o	Russia_BA_Okunevo_1.or.2d.rel.I3426_dup.I3427.SG	Mbuti	0.26306	0.007873	33.411	13428
Guanzhuang	Russia_Ekven_OldBeringSea	Mbuti	0.292166	0.002654	110.073	537764		Guanzhuang_o	Kazakhstan_Central_Steppe_EMBA.SG	Mbuti	0.262418	0.007438	35.283	14097
Guanzhuang	Russia_UstIda_EBA.SG	Mbuti	0.292138	0.002773	105.362	400344		Guanzhuang_o	JRTG_HE	Mbuti	0.262343	0.008493	30.889	13028
Guanzhuang	Russia_UstBelaya_MED.SG	Mbuti	0.291889	0.005029	58.046	44036		Guanzhuang_o	Tatar_Tomsk.SG	Mbuti	0.262179	0.007149	36.675	14105
Guanzhuang	Russia_AngaraRiver_Medieval.SG	Mbuti	0.291869	0.003402	85.791	204932		Guanzhuang_o	Kazakhstan_IA_Berel_Pazyryk	Mbuti	0.261924	0.008171	32.055	11763
Guanzhuang	Russia_Siberia_Lena_EBA	Mbuti	0.291831	0.002697	108.21	510475		Guanzhuang_o	G218_HE	Mbuti	0.261597	0.00946	27.652	11300
Guanzhuang	Mongolia_Uvurkhangai_LatEMedieval	Mbuti	0.29175	0.003623	80.527	108082		Guanzhuang_o	Uzbek.SG	Mbuti	0.26136	0.006392	40.887	14344
Guanzhuang	USA_AK_Athabskan.SG	Mbuti	0.291663	0.003249	89.766	280503		Guanzhuang_o	Aleut_o.DG	Mbuti	0.261062	0.007287	35.824	13687
Guanzhuang	SSG_BA3	Mbuti	0.29154	0.002926	99.642	521836		Guanzhuang_o	Hazara.DG	Mbuti	0.260975	0.00641	40.713	14045
Guanzhuang	Kazakhstan_Birlik_Tasmola_EIA	Mbuti	0.291319	0.002775	104.973	408669		Guanzhuang_o	BEN.SG	Mbuti	0.26068	0.007926	32.889	13682
Guanzhuang	Canada_Thule.SG	Mbuti	0.291219	0.005289	55.063	35994		Guanzhuang_o	Chukchi.DG	Mbuti	0.258187	0.006976	37.009	13693
Guanzhuang	Thailand_IA_1d.rel.Th530.WGC	Mbuti	0.291074	0.005995	48.554	25379		Guanzhuang_o	Khonda_Dora.DG	Mbuti	0.257396	0.00693	37.145	13563
Guanzhuang	Vietnam_N_all_published	Mbuti	0.291002	0.004957	58.703	39309		Guanzhuang_o	ONG.SG	Mbuti	0.25717	0.00664	38.73	14302
Guanzhuang	Argentina_ArroyoSeco2_7400BP_contam	Mbuti	0.290933	0.007932	36.679	13684		Guanzhuang_o	Mongolia_Xiongnu_o2.SG	Mbuti	0.257047	0.008282	31.035	12832
Guanzhuang	Vietnam_N	Mbuti	0.290882	0.003627	80.19	82510		Guanzhuang_o	BIR_o.SG	Mbuti	0.257022	0.008167	31.473	13715
Guanzhuang	Mongolia_BA_1	Mbuti	0.290876	0.003063	94.966	328707		Guanzhuang_o	Bashkir_o.SG	Mbuti	0.256767	0.008318	30.868	13839
Guanzhuang	Brazil_Botocudo.SG	Mbuti	0.290832	0.002803	103.742	485368		Guanzhuang_o	Kazakhstan_Berel_IA	Mbuti	0.256523	0.006331	40.522	14415
Guanzhuang	Russia_Buryatia_M.SG	Mbuti	0.290823	0.003128	92.964	305964		Guanzhuang_o	Russia_KusnarenkovoKarajakupovo_Medieval.SG	Mbuti	0.256514	0.008842	29.01	11535
Guanzhuang	Russia_LenaRiver_N.SG	Mbuti	0.290755	0.002691	108.058	534649		Guanzhuang_o	BIR.SG	Mbuti	0.256498	0.006156	41.667	14666
Guanzhuang	Qihe3	Mbuti	0.290659	0.003202	90.788	251254		Guanzhuang_o	Mayan_o2.SDG	Mbuti	0.256438	0.00627	40.896	14720
Guanzhuang	China_Xinjian_IA_o2.SG	Mbuti	0.290369	0.004723	61.473	51925		Guanzhuang_o	Russia_Bolshoy	Mbuti	0.256418	0.008318	30.827	10747
Guanzhuang	Vietnam_N_all	Mbuti	0.290325	0.003733	77.764	77426		Guanzhuang_o	Kazakhstan_Karluk_1.SG	Mbuti	0.256383	0.008346	30.72	12885
Guanzhuang	Russia_Ekven_OldBeringSea_dup.I7339.SG	Mbuti	0.290291	0.003027	95.889	307817		Guanzhuang_o	Indian_GreatAndaman_100BP.SG	Mbuti	0.256028	0.008228	31.115	13271
Guanzhuang	Mongolia_EBA_Ulgii_1_dup.I6361	Mbuti	0.290285	0.002974	97.618	411304		Guanzhuang_o	Kazakhstan_IA_Saka_dup.I7110.SG	Mbuti	0.255726	0.008387	30.491	12270
Guanzhuang	Russia_Uelen_OldBeringSea_published	Mbuti	0.290253	0.003173	91.469	219042		Guanzhuang_o	Russia_Sargat_IA	Mbuti	0.254014	0.006556	38.747	14010
Guanzhuang	Russia_Siberia_UP	Mbuti	0.290034	0.003118	93.034	230718		Guanzhuang_o	JAR.SG	Mbuti	0.253807	0.006693	37.92	14183
Guanzhuang	Canada_6500BP.SG	Mbuti	0.289991	0.003395	85.415	189166		Guanzhuang_o	Mixtec_2.DG	Mbuti	0.253457	0.007365	34.414	13599
Guanzhuang	China_AR_IA	Mbuti	0.289917	0.006084	47.649	23169		Guanzhuang_o	Turkmen.SG	Mbuti	0.253268	0.006973	36.321	14131
Guanzhuang	Mongolia_Uvs_EIAXiongnuLateMedival_o	Mbuti	0.289879	0.00277	104.662	461506		Guanzhuang_o	Nasioi.SDG	Mbuti	0.252954	0.006252	40.462	14907
Guanzhuang	Bahamas_EleutheraIsl_Ceramic_dup.I14878	Mbuti	0.28986	0.003281	88.35	236004		Guanzhuang_o	Mari.SG	Mbuti	0.252915	0.00835	30.291	13292
Guanzhuang	Peru_LimaCoast_MH_1000BP	Mbuti	0.289543	0.005867	49.352	31408		Guanzhuang_o	Kazakhstan_Botai_Eneolithic.SG	Mbuti	0.252517	0.006654	37.95	14294
Guanzhuang	Liangdao1	Mbuti	0.289541	0.003629	79.78	138552		Guanzhuang_o	Mongolia_EIA_Sagly_4	Mbuti	0.25251	0.006523	38.711	13716
Guanzhuang	USA_AK_Ancient_Athabaskan_1100BP.SG	Mbuti	0.289529	0.003027	95.662	526178		Guanzhuang_o	Russia_IA_3.SG	Mbuti	0.251975	0.007884	31.962	12724
Guanzhuang	Peru_Kaillachuro_Unknown.SG	Mbuti	0.289512	0.003422	84.603	151513		Guanzhuang_o	Kazakhstan_Central_Saka.SG	Mbuti	0.25189	0.006932	36.336	13635
Guanzhuang	USA_AK_Ancient_Athabaskan_1100BP.DG	Mbuti	0.289501	0.002981	97.109	528643		Guanzhuang_o	Kurumba.DG	Mbuti	0.251825	0.007028	35.832	13542
Guanzhuang	Russia_Uelen_OldBeringSea	Mbuti	0.289478	0.002712	106.74	462226		Guanzhuang_o	Maori.DG	Mbuti	0.251371	0.007088	35.464	13646
Guanzhuang	Moldova_Glinoe_Scythian_o3_lc.SG	Mbuti	0.289313	0.010823	26.731	6966		Guanzhuang_o	Mongolia_LBA_CenterWest_5	Mbuti	0.251245	0.008181	30.711	11720
Guanzhuang	Mongolia_Khuvsgul_XiongnuLatEMedieval_2	Mbuti	0.289313	0.002629	110.045	489205		Guanzhuang_o	RAJ.SG	Mbuti	0.250602	0.005697	43.989	15027
Guanzhuang	USA_Nevada_LovelockCave_600BP.SG	Mbuti	0.289269	0.002962	97.654	527421		Guanzhuang_o	Mongolia_Khovd_MLBAEarlyMedieval	Mbuti	0.250393	0.008106	30.89	11368
Guanzhuang	USA_AK_PaleoAleut	Mbuti	0.289208	0.002918	99.129	408310		Guanzhuang_o	Bashkir.SG	Mbuti	0.250383	0.006917	36.196	14155
Guanzhuang	PEL_oEastAsian.SG	Mbuti	0.289171	0.003022	95.698	524918		Guanzhuang_o	Bougainville.DG	Mbuti	0.250016	0.006936	36.047	13839
Guanzhuang	Russia_UstIda_LN.SG	Mbuti	0.289102	0.002739	105.561	492172		Guanzhuang_o	TBLS_IA1	Mbuti	0.249917	0.007065	35.375	13466
Guanzhuang	Altaian.DG	Mbuti	0.288954	0.002912	99.232	518489		Guanzhuang_o	ABST_IA_K	Mbuti	0.249197	0.009541	26.118	10024
Guanzhuang	Russia_UstBelaya_Angara_Medieval	Mbuti	0.288948	0.003906	73.977	99269		Guanzhuang_o	Mongolia_Uvs_EIAXiongnuLateMedival	Mbuti	0.249061	0.006742	36.94	13423
Guanzhuang	USA_Nevada_LovelockCave_1850BP.SG	Mbuti	0.288877	0.002876	100.434	535088		Guanzhuang_o	MXL.SG	Mbuti	0.247829	0.005377	46.088	16028
Guanzhuang	Mongolia_Selenge_XiongnuLatEMedieval	Mbuti	0.28887	0.00274	105.408	435497		Guanzhuang_o	ILA.SG	Mbuti	0.247799	0.005817	42.596	14818
Guanzhuang	Russia_Kolyma_M.SG	Mbuti	0.288869	0.003	96.286	527152		Guanzhuang_o	BEB.SG	Mbuti	0.246996	0.005429	45.499	15960
Guanzhuang	Yukpa.SG	Mbuti	0.288839	0.003062	94.325	527216		Guanzhuang_o	Bengali.DG	Mbuti	0.246964	0.006103	40.466	14036
Guanzhuang	Russia_Ekven_IA.SG	Mbuti	0.288838	0.002945	98.083	313159		Guanzhuang_o	JMCY_IA2	Mbuti	0.246951	0.009164	26.948	11949
Guanzhuang	Russia_Magadan_BA_dup.I11280.SG	Mbuti	0.288833	0.003014	95.821	395906		Guanzhuang_o	PEL_SomeAfrican.SG	Mbuti	0.246668	0.005648	43.671	15186
Guanzhuang	Peru_Highlands_Chinchawas_MH	Mbuti	0.288784	0.003528	81.861	136682		Guanzhuang_o	ZGLK_IA1	Mbuti	0.24664	0.007211	34.203	13729
Guanzhuang	Mongolia_LBA_CenterWest_4	Mbuti	0.288713	0.002584	111.728	494893		Guanzhuang_o	Aleut_o1.DG	Mbuti	0.245663	0.007064	34.777	13688
Guanzhuang	Argentina_Aconcagua_Inca_500BP.SG	Mbuti	0.288652	0.003038	95.004	457246		Guanzhuang_o	Mongolia_Arkhangai_Xiongnu	Mbuti	0.245456	0.007103	34.555	13103
Guanzhuang	USA_CA_SanMiguel_IslandChumash.SG	Mbuti	0.28846	0.003026	95.326	440669		Guanzhuang_o	Kapu.DG	Mbuti	0.245367	0.006395	38.371	14052
Guanzhuang	Russia_Ekven_OldBeringSea_dup.I7343.SG	Mbuti	0.288408	0.003432	84.029	151105		Guanzhuang_o	WZ_IA4	Mbuti	0.24535	0.008594	28.548	11944
Guanzhuang	Canada_BigBar_5700BP.SG	Mbuti	0.288316	0.003045	94.671	362954		Guanzhuang_o	Vanuatu_1300BP_all	Mbuti	0.244871	0.008257	29.658	11995
Guanzhuang	Bahamas_Taino.SG	Mbuti	0.288264	0.002909	99.106	527256		Guanzhuang_o	Saami.DG	Mbuti	0.244406	0.006586	37.11	14061
Guanzhuang	USA_WA_Kennewick.SG	Mbuti	0.288117	0.003087	93.322	323630		Guanzhuang_o	Mongolia_Khuvsgul_XiongnuLatEMedieval_1	Mbuti	0.244114	0.007628	32.001	11926
Guanzhuang	Peru_RioUncallane_1800BP.SG	Mbuti	0.288081	0.00298	96.655	525233		Guanzhuang_o	WTL_IA	Mbuti	0.244014	0.007081	34.462	13865
Guanzhuang	Chipewyan.DG	Mbuti	0.288079	0.002873	100.254	526421		Guanzhuang_o	ABST_IA1	Mbuti	0.243922	0.006818	35.777	14048
Guanzhuang	Peru_RioUncallane_1600BP_o.SG	Mbuti	0.288031	0.00314	91.738	377018		Guanzhuang_o	PEL_oHighEuropean.SG	Mbuti	0.243858	0.007285	33.473	13923
Guanzhuang	Belize_MayahakCabPek_9300BP	Mbuti	0.287925	0.003465	83.093	170761		Guanzhuang_o	Russia_Karasuk_oRISE.SG	Mbuti	0.243856	0.006588	37.015	14554
Guanzhuang	Mongolia_Sukhbaatar_Xiongnu	Mbuti	0.287861	0.003417	84.241	172476		Guanzhuang_o	Russia_Tagar.SG	Mbuti	0.243816	0.006584	37.032	14489
Guanzhuang	Karitiana.DG	Mbuti	0.287839	0.002737	105.157	527354		Guanzhuang_o	Irula.DG	Mbuti	0.243519	0.006174	39.445	14006
Guanzhuang	Russia_Ekven_OldBeringSea_dup.I7341.SG	Mbuti	0.287787	0.002947	97.665	417744		Guanzhuang_o	QFQH_IA	Mbuti	0.243496	0.009094	26.776	11721
Guanzhuang	Aymara.SG	Mbuti	0.287778	0.00297	96.882	527291		Guanzhuang_o	Vanuatu_150BP	Mbuti	0.243314	0.007618	31.938	12084
Guanzhuang	Hungary_Hun_Elite_IA	Mbuti	0.287762	0.003951	72.831	82786		Guanzhuang_o	Madiga.DG	Mbuti	0.24322	0.006203	39.212	14000
Guanzhuang	USA_CA_Late_SanNicolas_1d.rel.SN-09.SG	Mbuti	0.287731	0.004916	58.534	46791		Guanzhuang_o	Norway_LN_BA.SG	Mbuti	0.243034	0.009523	25.52	10524
Guanzhuang	Mongolia_EBA_Ulgii_1	Mbuti	0.287683	0.002674	107.589	433731		Guanzhuang_o	Mongolia_LBA_MongunTaiga_3	Mbuti	0.242809	0.008336	29.128	10426
Guanzhuang	Karitiana.SG	Mbuti	0.287676	0.002877	99.985	527356		Guanzhuang_o	Relli_2.DG	Mbuti	0.242589	0.007062	34.352	13644
Guanzhuang	Mongolia_EBA_Ulgii_1_dup.I13180	Mbuti	0.287583	0.004192	68.602	62988		Guanzhuang_o	Papuan.DG	Mbuti	0.24251	0.006403	37.872	14394
Guanzhuang	Russia_Ekven_OldBeringSea.SG	Mbuti	0.28753	0.002948	97.524	302017		Guanzhuang_o	Burusho.SDG	Mbuti	0.242424	0.005454	44.449	15790
Guanzhuang	Surui.DG	Mbuti	0.287485	0.002885	99.649	523310		Guanzhuang_o	UBR.SG	Mbuti	0.24242	0.005735	42.268	15056
Guanzhuang	Curacao_SantaCruz_Ceramic	Mbuti	0.287384	0.002913	98.662	350296		Guanzhuang_o	Tatar_Volga.SG	Mbuti	0.242419	0.006912	35.073	14197
Guanzhuang	Peru_Chincha_LH.SG	Mbuti	0.2873	0.002743	104.728	543966		Guanzhuang_o	KKSX_IA1	Mbuti	0.242134	0.008883	27.257	10427
Guanzhuang	Mongolia_Sukhbaatar_XiongnuLatEMedieval_father.or.son.TAV011	Mbuti	0.287236	0.003397	84.559	151453		Guanzhuang_o	Papuan.SDG	Mbuti	0.242006	0.006304	38.389	14870
Guanzhuang	Indonesia_LN_BA_IA.SG	Mbuti	0.287214	0.004695	61.181	47213		Guanzhuang_o	Poland_CWC_3.SG	Mbuti	0.241861	0.00777	31.129	13900
Guanzhuang	Mongolia_Khuvsgul_XiongnuLatEMedieval_2_brother.SKT002	Mbuti	0.287198	0.003819	75.209	104354		Guanzhuang_o	India_RoopkundA	Mbuti	0.241741	0.007807	30.965	11079
Guanzhuang	USA_AK_Ancient_Athabaskan_1100BP_father.or.son.I5319	Mbuti	0.287028	0.00306	93.79	412324		Guanzhuang_o	VLR.SG	Mbuti	0.241542	0.005619	42.983	14845
Guanzhuang	USA_CA_Late_SanNicolas.SG	Mbuti	0.287017	0.00284	101.045	523128		Guanzhuang_o	Yadava.DG	Mbuti	0.241441	0.006489	37.209	14045
Guanzhuang	Peru_ElBrujo_EIP_1300BP	Mbuti	0.286977	0.003096	92.682	245987		Guanzhuang_o	Punjabi.DG	Mbuti	0.24132	0.006106	39.52	14292
Guanzhuang	Mongolia_LBA_Khovsgol_6	Mbuti	0.286967	0.002604	110.195	530140		Guanzhuang_o	G218_IA1	Mbuti	0.241116	0.00816	29.55	10551
Guanzhuang	Peru_Chincha_LH	Mbuti	0.28696	0.00274	104.725	544763		Guanzhuang_o	STU.SG	Mbuti	0.240895	0.005336	45.146	15936
Guanzhuang	Vietnam_LN_HaLongCulture.SG	Mbuti	0.286945	0.004635	61.913	51925		Guanzhuang_o	Mala.DG	Mbuti	0.240627	0.006099	39.453	14307
Guanzhuang	USA_Nevada_SpiritCave_11000BP.SG	Mbuti	0.286938	0.002976	96.408	528091		Guanzhuang_o	STU_o1.SG	Mbuti	0.240482	0.006772	35.512	14086
Guanzhuang	Peru_SoroMikayaPatjxa_6800BP.SG	Mbuti	0.286909	0.005307	54.06	35525		Guanzhuang_o	Russia_Sarmatian.SG	Mbuti	0.240465	0.007446	32.295	12578
Guanzhuang	Bahamas_EleutheraIsl_Ceramic_published	Mbuti	0.286895	0.003922	73.146	89075		Guanzhuang_o	ITU.SG	Mbuti	0.240449	0.005321	45.186	15943
Guanzhuang	Mongolia_Khovd_Xiongnu	Mbuti	0.286883	0.0031	92.552	255084		Guanzhuang_o	Punjabi_o.DG	Mbuti	0.240396	0.007103	33.845	13611
Guanzhuang	Peru_MH_LIP_ElBrujo_850BP	Mbuti	0.286812	0.003381	84.826	148447		Guanzhuang_o	Australian.DG	Mbuti	0.240248	0.006318	38.026	13871
Guanzhuang	USA_AK_Ancient_Athabaskan_1100BP	Mbuti	0.286774	0.002871	99.874	464030		Guanzhuang_o	CSC_IA1	Mbuti	0.239767	0.007757	30.911	12130
Guanzhuang	USA_AK_NeoAleut_published	Mbuti	0.286743	0.003908	73.381	86127		Guanzhuang_o	Burusho.DG	Mbuti	0.2397	0.006317	37.943	14070
Guanzhuang	USA_AK_NeoAleut	Mbuti	0.286696	0.002724	105.24	377463		Guanzhuang_o	Mongolia_Arkhangai_EarlyMedieval	Mbuti	0.239438	0.006487	36.909	13923
Guanzhuang	StLucia_Lavoutte_Ceramic	Mbuti	0.286528	0.002696	106.268	521816		Guanzhuang_o	Brahmin.DG	Mbuti	0.23921	0.006166	38.796	14060
Guanzhuang	Dushan	Mbuti	0.286516	0.00325	88.169	203572		Guanzhuang_o	Relli_1.DG	Mbuti	0.239085	0.006939	34.457	13597
Guanzhuang	USA_CA_SanCruz_IslandChumash.SG	Mbuti	0.286499	0.002943	97.338	493854		Guanzhuang_o	Vanuatu_150BP_all	Mbuti	0.238659	0.007896	30.227	12088
Guanzhuang	Bahamas_SouthAndros_Ceramic.SG	Mbuti	0.286432	0.002789	102.715	543989		Guanzhuang_o	GIH.SG	Mbuti	0.238601	0.005346	44.632	15939
Guanzhuang	USA_CA_LSCI.SG	Mbuti	0.28636	0.002855	100.316	533552		Guanzhuang_o	PJL.SG	Mbuti	0.238373	0.005361	44.465	15994
Guanzhuang	Mayan.DG	Mbuti	0.286308	0.002834	101.043	527290		Guanzhuang_o	Russia_HG_Karelia	Mbuti	0.238239	0.009145	26.052	11095
Guanzhuang	Peru_RioUncallane_1600BP.SG	Mbuti	0.28624	0.002772	103.272	539343		Guanzhuang_o	Balochi_oEastAsian.SDG	Mbuti	0.237726	0.006963	34.143	14061
Guanzhuang	Argentina_NorthTierradelFuego_Selknam_500BP_brother.I12367	Mbuti	0.286186	0.003783	75.659	111355		Guanzhuang_o	Sweden_Motala_HG.SG	Mbuti	0.237501	0.008001	29.683	12277
Guanzhuang	Chane.DG	Mbuti	0.286038	0.002944	97.169	518073		Guanzhuang_o	Ukraine_Scythian.SG	Mbuti	0.237258	0.007517	31.563	13180
Guanzhuang	Peru_Highlands_LIP_Chimu	Mbuti	0.286023	0.002854	100.228	350746		Guanzhuang_o	China_AmurRiver_Paleolithic	Mbuti	0.236854	0.009677	24.476	10060
Guanzhuang	Mongolia_MBA_Munkhkhairkhan_1	Mbuti	0.285981	0.002661	107.47	432801		Guanzhuang_o	CGGL_BA1	Mbuti	0.23624	0.008041	29.379	12288
Guanzhuang	Mixe.DG	Mbuti	0.285973	0.002731	104.732	530902		Guanzhuang_o	Avar.SG	Mbuti	0.236165	0.008677	27.217	12625
Guanzhuang	Altaian.SG	Mbuti	0.28594	0.003066	93.252	526473		Guanzhuang_o	Poland_Koszyce_GAC.SG_brother.RISE1169.SG.brother.RISE1173.SG.brother.RISE1163.SG	Mbuti	0.235988	0.008573	27.526	12484
Guanzhuang	Peru_Chanka_LIP	Mbuti	0.28589	0.002984	95.81	333165		Guanzhuang_o	Poland_Koszyce_GAC.SG_son.RISE1159.SG.son.RISE1168.SG	Mbuti	0.235863	0.008959	26.326	11528
Guanzhuang	Pima.DG	Mbuti	0.285857	0.002756	103.736	525879		Guanzhuang_o	England_Viking_o.SG	Mbuti	0.235798	0.008137	28.979	11423
Guanzhuang	USA_CA_Late_SanNicolas_contam.SG	Mbuti	0.285812	0.003714	76.948	117713		Guanzhuang_o	Estonia_IA.SG	Mbuti	0.235777	0.008731	27.004	10526
Guanzhuang	Russia_Siberia_Angara_EN	Mbuti	0.285756	0.008487	33.669	11961		Guanzhuang_o	England_IA.SG	Mbuti	0.235718	0.007745	30.434	13885
Guanzhuang	Peru_MH_LIP_Lambayeque	Mbuti	0.285697	0.002852	100.191	376068		Guanzhuang_o	Kalash.SDG	Mbuti	0.235684	0.005675	41.527	15558
Guanzhuang	Argentina_BeagleChannel_Yamana_100BP	Mbuti	0.285684	0.002881	99.178	394043		Guanzhuang_o	Russia_LateSarmatian.SG	Mbuti	0.235567	0.0071	33.178	13727
Guanzhuang	Peru_Lima_EIP_1450BP	Mbuti	0.285673	0.003563	80.178	137228		Guanzhuang_o	STU_o2.SG	Mbuti	0.235303	0.006805	34.58	14132
Guanzhuang	Russia_Uelen_IA.SG	Mbuti	0.285665	0.006769	42.202	18040		Guanzhuang_o	Estonian.DG	Mbuti	0.235281	0.006336	37.134	14089
Guanzhuang	Argentina_ArroyoSeco2_7700BP	Mbuti	0.285588	0.002812	101.576	405750		Guanzhuang_o	Norway_N_HG.SG	Mbuti	0.235203	0.009291	25.316	10641
Guanzhuang	Piapoco.DG	Mbuti	0.285516	0.002782	102.617	526048		Guanzhuang_o	TBLS_IA_K	Mbuti	0.235124	0.008773	26.8	10223
Guanzhuang	Japan_Jomon.SG	Mbuti	0.285348	0.00312	91.459	413066		Guanzhuang_o	Balochi.DG	Mbuti	0.235077	0.006304	37.29	14050
Guanzhuang	PuertoRico_Monserrate_Ceramic	Mbuti	0.285252	0.003195	89.293	278613		Guanzhuang_o	TGB_BA1	Mbuti	0.234905	0.009086	25.854	11565
Guanzhuang	Quechua.DG	Mbuti	0.285201	0.002801	101.806	527098		Guanzhuang_o	Kalash.DG	Mbuti	0.234879	0.006341	37.04	14028
Guanzhuang	Peru_LIP_Ychsma	Mbuti	0.285134	0.003317	85.96	143840		Guanzhuang_o	WLBL_IA1	Mbuti	0.234752	0.00859	27.329	12309
Guanzhuang	Brazil_Enoque_HG.SG	Mbuti	0.285128	0.005183	55.008	34419		Guanzhuang_o	Sweden_Gotland_Vasterbjers_PittedWare_BattleAxe.SG	Mbuti	0.234498	0.006379	36.763	14688
Guanzhuang	Canada_ASO.SG	Mbuti	0.285101	0.002798	101.897	403380		Guanzhuang_o	WZ_IA3	Mbuti	0.234434	0.008767	26.739	11916
Guanzhuang	USA_CA_Early_SanNicolas.SG	Mbuti	0.285074	0.002867	99.425	524587		Guanzhuang_o	Pakistan_Loebanr_IA	Mbuti	0.23435	0.006275	37.348	13862
Guanzhuang	PuertoRico_LosIndios_Ceramic	Mbuti	0.28504	0.004923	57.904	42891		Guanzhuang_o	Russia_Arkhangelsk_Veretye_Mesolithic.SG	Mbuti	0.234227	0.008506	27.535	13363
Guanzhuang	Kazakhstan_Hun_Elite_LIA	Mbuti	0.285017	0.003301	86.346	188681		Guanzhuang_o	Sweden_Gotland_Ajvide_PittedWare_BattleAxe.SG	Mbuti	0.233953	0.008289	28.224	11537
Guanzhuang	PuertoRico_Collores_Ceramic	Mbuti	0.284939	0.003054	93.299	309316		Guanzhuang_o	Pakistan_H_SaiduSharif	Mbuti	0.233877	0.006369	36.722	13644
Guanzhuang	Bolivia_MiraFlores_MH	Mbuti	0.284909	0.00325	87.653	287695		Guanzhuang_o	Tajik.SG	Mbuti	0.233844	0.006319	37.004	14370
Guanzhuang	Mongolia_MBA_Munkhkhairkhan_3	Mbuti	0.284825	0.00339	84.018	185452		Guanzhuang_o	Sweden_Gotland_Hemmor_PittedWare_BattleAxe.SG	Mbuti	0.23384	0.007845	29.808	13163
Guanzhuang	Bahamas_EleutheraIsl_Ceramic	Mbuti	0.284799	0.00277	102.818	454843		Guanzhuang_o	Uzbekistan_SappaliTepe_BA2	Mbuti	0.233821	0.008707	26.854	10288
Guanzhuang	Argentina_NorthTierradelFuego_Selknam_500BP	Mbuti	0.284669	0.002838	100.321	414965		Guanzhuang_o	Russia_Yana_UP.SG	Mbuti	0.23372	0.007024	33.273	14107
Guanzhuang	Peru_LaGalgada_4100BP	Mbuti	0.284597	0.003001	94.819	382946		Guanzhuang_o	Russian.SDG	Mbuti	0.233649	0.00556	42.02	15853
Guanzhuang	USA_AK_PaleoAleut_published	Mbuti	0.284565	0.005316	53.528	40433		Guanzhuang_o	Russia_Mezhovskaya.SG	Mbuti	0.233505	0.008884	26.284	11736
Guanzhuang	Peru_LIP_Botigiriayocc_600BP	Mbuti	0.284547	0.002952	96.399	452427		Guanzhuang_o	Spain_HG	Mbuti	0.233347	0.008892	26.243	10736
Guanzhuang	PuertoRico_SantaElena_Ceramic	Mbuti	0.284536	0.002775	102.529	419317		Guanzhuang_o	Spain_C_oAnatolia.SG	Mbuti	0.233318	0.008213	28.41	13889
Guanzhuang	USA_Anzick_realigned.SG	Mbuti	0.284507	0.003013	94.421	519527		Guanzhuang_o	Sweden_PWC.SG	Mbuti	0.233284	0.007863	29.668	13182
Guanzhuang	Canada_ASO_lc.SG	Mbuti	0.284499	0.009184	30.977	9571		Guanzhuang_o	FIN.SG	Mbuti	0.233274	0.005605	41.617	15933
Guanzhuang	Argentina_MitrePeninsula_Haush_400BP	Mbuti	0.284488	0.0028	101.594	379360		Guanzhuang_o	Russia_EarlySarmatian_SouthernUrals.SG	Mbuti	0.233247	0.008366	27.881	10562
Guanzhuang	TWXC_IA	Mbuti	0.284464	0.003511	81.016	138872		Guanzhuang_o	Iran_Hasanlu_IA.SG	Mbuti	0.233201	0.008705	26.789	11255
Guanzhuang	Panama_IsthmoColombian_PreColonial.SG	Mbuti	0.28446	0.002811	101.187	406769		Guanzhuang_o	Tajik.DG	Mbuti	0.232972	0.006421	36.281	14084
Guanzhuang	USA_CA_SanFranciscoBay.SG	Mbuti	0.284441	0.003631	78.331	165148		Guanzhuang_o	Pathan.DG	Mbuti	0.232954	0.006177	37.716	14070
Guanzhuang	Bahamas_AbacoIsl_Ceramic	Mbuti	0.284404	0.00279	101.932	412378		Guanzhuang_o	Sweden_Mesolithic.SG	Mbuti	0.232829	0.007468	31.175	14093
Guanzhuang	Peru_Ullujaya_EIP_1350BP	Mbuti	0.28435	0.003198	88.912	200204		Guanzhuang_o	Indian.SG	Mbuti	0.23245	0.008298	28.014	13808
Guanzhuang	PuertoRico_CaboRojo11_Ceramic	Mbuti	0.284261	0.002977	95.474	294894		Guanzhuang_o	Serbia_Mokrin_EBA_Maros_1d.rel.MOK15.SG	Mbuti	0.232445	0.009164	25.364	10343
Guanzhuang	Haiti_Diale1_Ceramic	Mbuti	0.284239	0.00281	101.147	452258		Guanzhuang_o	Sindhi_Pakistan.SDG	Mbuti	0.232235	0.005558	41.785	15668
Guanzhuang	Huichol.SG	Mbuti	0.284142	0.002965	95.833	527361		Guanzhuang_o	Brahui.SDG.SDG	Mbuti	0.232203	0.00715	32.475	14033
Guanzhuang	Mexico_Zapotec.DG	Mbuti	0.284065	0.002707	104.942	527891		Guanzhuang_o	Russia_Sunghir_Medieval.SG	Mbuti	0.232145	0.008195	28.326	13622
Guanzhuang	USA_CA_Chumash.SG	Mbuti	0.284058	0.002886	98.435	414706		Guanzhuang_o	Germany_CordedWare	Mbuti	0.232119	0.006973	33.29	13382
Guanzhuang	Peru_Laramate_900BP	Mbuti	0.284036	0.002676	106.15	430729		Guanzhuang_o	Sweden_Gotland_Hemmor_PittedWare_BattleAxe_minus.SG	Mbuti	0.232105	0.0079	29.379	13074
Guanzhuang	Mongolia_Zavkhan_MLBA	Mbuti	0.284015	0.002927	97.042	290512		Guanzhuang_o	Sweden_Gotland_Vasterbjers_PittedWare_BattleAxe_minus.SG	Mbuti	0.232082	0.006386	36.343	14823
Guanzhuang	Peru_Lima_LIP_650BP	Mbuti	0.283921	0.003089	91.921	414946		Guanzhuang_o	Tajik_o.SG	Mbuti	0.23191	0.008063	28.761	13809
Guanzhuang	Russia_LenaRiver_LUP.SG	Mbuti	0.283621	0.003615	78.452	121831		Guanzhuang_o	Sindhi_Pakistan.DG	Mbuti	0.231845	0.006366	36.417	14080
Guanzhuang	Nahua.DG	Mbuti	0.28361	0.002823	100.471	518423		Guanzhuang_o	Russia_Sidelkino_HG.SG	Mbuti	0.231774	0.009045	25.623	11962
Guanzhuang	Peru_EIP_Moche	Mbuti	0.283608	0.003893	72.842	82878		Guanzhuang_o	Russia_Abkhasian.DG	Mbuti	0.23169	0.006317	36.679	14106
Guanzhuang	Bolivia_MH_Miraflores	Mbuti	0.283577	0.00289	98.132	378919		Guanzhuang_o	Sweden_Motala_HG	Mbuti	0.231685	0.007731	29.968	11798
Guanzhuang	Peru_Palpa_MH_950BP	Mbuti	0.283564	0.007742	36.627	14894		Guanzhuang_o	Russia_Afanasievo_sister.I3387_mother.I6711.SG	Mbuti	0.231638	0.009043	25.615	11803
Guanzhuang	Russia_LBA_2.SG	Mbuti	0.283543	0.004161	68.144	80617		Guanzhuang_o	Moldova_Glinoe_Scythian.SG	Mbuti	0.231544	0.007201	32.156	13562
Guanzhuang	Peru_Lauricocha_5800BP	Mbuti	0.283506	0.003148	90.052	269738		Guanzhuang_o	Russian.DG	Mbuti	0.231389	0.006356	36.404	14120
Guanzhuang	PuertoRico_CanasColloresMonserrate_Ceramic	Mbuti	0.283439	0.002793	101.495	404194		Guanzhuang_o	Lithuania_LN	Mbuti	0.231321	0.007466	30.981	13705
Guanzhuang	Peru_Ullujaya_MH_950BP	Mbuti	0.283406	0.00337	84.098	198517		Guanzhuang_o	Pathan.SDG	Mbuti	0.231292	0.005475	42.244	15742
Guanzhuang	Bahamas_LongIsl_Ceramic	Mbuti	0.28339	0.002942	96.334	381535		Guanzhuang_o	Poland_Viking.SG	Mbuti	0.231114	0.007167	32.247	13960
Guanzhuang	USA_Ancient_Beringian.SG	Mbuti	0.283376	0.002958	95.795	528447		Guanzhuang_o	Sweden_BAC.SG	Mbuti	0.230977	0.007623	30.299	13286
Guanzhuang	PuertoRico_PasodelIndio_Ceramic_dup.PDI008	Mbuti	0.283293	0.004988	56.792	45690		Guanzhuang_o	PUN.SG	Mbuti	0.230963	0.008012	28.827	13728
Guanzhuang	Mongolia_Arkhangai_LatEMedieval	Mbuti	0.283189	0.002639	107.311	474619		Guanzhuang_o	Iranian.DG	Mbuti	0.230792	0.006268	36.821	14097
Guanzhuang	USA_NM_Chaco	Mbuti	0.283187	0.004046	69.994	75967		Guanzhuang_o	Sweden_Viking_o2.SG	Mbuti	0.230647	0.008464	27.25	13718
Guanzhuang	Argentina_LagunaChica_1600BP	Mbuti	0.283166	0.003301	85.785	190922		Guanzhuang_o	Scotland_Viking.SG	Mbuti	0.23059	0.007098	32.488	14043
Guanzhuang	Argentina_NorthTierradelFiego_Selknam_100BP.SG	Mbuti	0.283166	0.002986	94.84	367861		Guanzhuang_o	Orcadian.DG	Mbuti	0.230367	0.006369	36.17	14109
Guanzhuang	Belize_SakiTzul_7400BP	Mbuti	0.283131	0.003225	87.783	208696		Guanzhuang_o	Chechen.DG	Mbuti	0.230338	0.007172	32.115	13592
Guanzhuang	Mongolia_Sukhbaatar_XiongnuLatEMedieval	Mbuti	0.283125	0.002826	100.196	432925		Guanzhuang_o	Ireland_EBA.SG	Mbuti	0.230324	0.006814	33.802	14280
Guanzhuang	Peru_SanSebastian_LIP_600BP	Mbuti	0.28312	0.003108	91.087	252121		Guanzhuang_o	Spain_C.SG	Mbuti	0.230112	0.006631	34.703	14325
Guanzhuang	Peru_Palpa_LIP_550BP	Mbuti	0.283113	0.002957	95.731	272885		Guanzhuang_o	French.DG	Mbuti	0.230106	0.006027	38.181	14396
Guanzhuang	PuertoRico_PasodelIndio_Ceramic	Mbuti	0.283103	0.002707	104.588	481297		Guanzhuang_o	England_EarlyMedieval_Saxon.SG	Mbuti	0.230103	0.006045	38.067	14914
Guanzhuang	Argentina_ArroyoSeco2_7700BP_1d.or.2d.rel.I7090	Mbuti	0.28308	0.009284	30.493	10324		Guanzhuang_o	SMTS_IA1	Mbuti	0.230007	0.008783	26.187	11449
Guanzhuang	USA_CA_Chumash_NewCuyama.SG	Mbuti	0.283059	0.003287	86.124	173510		Guanzhuang_o	Russia_Viking_o.SG	Mbuti	0.229885	0.007944	28.938	12433
Guanzhuang	USA_CA_Late_SanNicolas.SG_1d.rel.SN-50	Mbuti	0.283043	0.003973	71.25	84497		Guanzhuang_o	Russia_HG_Karelia.SG	Mbuti	0.229842	0.008862	25.935	11654
Guanzhuang	Brazil_Sumidouro_10100BP.SG	Mbuti	0.283038	0.002764	102.4	539243		Guanzhuang_o	Vanuatu_1300BP	Mbuti	0.229816	0.009614	23.904	10017
Guanzhuang	Bahamas_LongIsl_Ceramic_published	Mbuti	0.283033	0.003265	86.678	173907		Guanzhuang_o	Russia_Afanasievo	Mbuti	0.229813	0.006431	35.737	14079
Guanzhuang	Bahamas_SouthAndros_Ceramic	Mbuti	0.282997	0.002856	99.088	422600		Guanzhuang_o	FIN_o.SG	Mbuti	0.229812	0.006619	34.722	14166
Guanzhuang	Mexico_Pericues.SG	Mbuti	0.282721	0.003172	89.139	210953		Guanzhuang_o	Poland_EBA.SG	Mbuti	0.229791	0.00856	26.845	12715
Guanzhuang	Brazil_Jabuticabeira2_2000BP	Mbuti	0.282692	0.00362	78.082	95579		Guanzhuang_o	Italy_LA_oCentralEuropean_o3CentralEuropean.SG	Mbuti	0.229681	0.008272	27.767	12210
Guanzhuang	PuertoRico_PuntaCandelero_Ceramic_o	Mbuti	0.282441	0.004256	66.366	71450		Guanzhuang_o	Russia_Srubnaya_Alakul.SG	Mbuti	0.22962	0.005918	38.8	14859
Guanzhuang	Peru_Lauricocha_8600BP	Mbuti	0.282405	0.002843	99.336	442892		Guanzhuang_o	Kazakhstan_Kangju_o3.SG	Mbuti	0.229327	0.009212	24.894	10993
Guanzhuang	TBLS_HE_K	Mbuti	0.282394	0.005415	52.15	32795		Guanzhuang_o	Turkish.DG	Mbuti	0.229038	0.006172	37.111	14084
Guanzhuang	Brazil_Moraes_5800BP	Mbuti	0.282253	0.003816	73.972	111084		Guanzhuang_o	Norway_IA.SG	Mbuti	0.228995	0.006813	33.614	13825
Guanzhuang	Brazil_Laranjal_6700BP	Mbuti	0.282252	0.003103	90.957	222268		Guanzhuang_o	Russia_Afanasievo.DG	Mbuti	0.228933	0.006567	34.859	14288
Guanzhuang	Bolivia_MH_Tiwanaku	Mbuti	0.282169	0.003492	80.812	127513		Guanzhuang_o	Serbia_Mokrin_EBA_Maros.SG	Mbuti	0.22885	0.005858	39.07	15256
Guanzhuang	Peru_LIP_Pacapaccari_600BP	Mbuti	0.282168	0.002978	94.741	314158		Guanzhuang_o	Iceland_Viking.SG	Mbuti	0.228821	0.005898	38.797	15067
Guanzhuang	USA_CA_Chumash_lc.SG	Mbuti	0.282125	0.008562	32.95	11053		Guanzhuang_o	Balochi.SDG	Mbuti	0.228812	0.005387	42.475	15788
Guanzhuang	Bahamas_CrookedIsl_Ceramic	Mbuti	0.282075	0.00278	101.466	393757		Guanzhuang_o	Norwegian.DG	Mbuti	0.228601	0.006841	33.415	13696
Guanzhuang	USA_CA_Early_SanNicolas_lc.SG	Mbuti	0.282018	0.005382	52.401	31733		Guanzhuang_o	Sweden_IA_2.SG	Mbuti	0.228577	0.00845	27.052	13832
Guanzhuang	USA_NM_Chaco_mother.I2717_mother.I6215.with.different.father.sibling.I5597	Mbuti	0.282005	0.004641	60.764	56859		Guanzhuang_o	MXL_oEuropean.SG	Mbuti	0.228544	0.006507	35.122	14301
Guanzhuang	Venezuela_LasLocas_Ceramic	Mbuti	0.281978	0.002763	102.051	410135		Guanzhuang_o	English.DG	Mbuti	0.228502	0.006172	37.023	14125
Guanzhuang	PuertoRico_Tibes_Ceramic	Mbuti	0.281931	0.003429	82.221	135391		Guanzhuang_o	Germany_EBA_Unetice	Mbuti	0.228483	0.007548	30.27	11936
Guanzhuang	Bolivia_MH_Iroco_1050BP	Mbuti	0.281907	0.003216	87.667	244927		Guanzhuang_o	Uzbekistan_Dzharkutan_BA_2	Mbuti	0.22847	0.008924	25.601	10220
Guanzhuang	USA_NM_Chaco_1d.rel.I5419	Mbuti	0.281823	0.004237	66.51	72146		Guanzhuang_o	Sweden_Viking_o1.SG	Mbuti	0.228441	0.008885	25.71	10294
Guanzhuang	Peru_Cuncaicha_9000BP	Mbuti	0.281808	0.003183	88.522	261519		Guanzhuang_o	Iran_TepeAbdulHosein_N.SG	Mbuti	0.228377	0.007954	28.711	12679
Guanzhuang	Peru_Lauricocha_3500BP	Mbuti	0.281567	0.003082	91.347	255870		Guanzhuang_o	Poland_CWC_1.SG	Mbuti	0.228348	0.007633	29.914	13948
Guanzhuang	Kusunda.DG	Mbuti	0.281501	0.00262	107.461	527115		Guanzhuang_o	Poland_BKG_o2.SG	Mbuti	0.228257	0.009118	25.035	11866
Guanzhuang	Quechua_oEuropean.DG	Mbuti	0.281501	0.002947	95.519	518383		Guanzhuang_o	Estonia_BA.SG	Mbuti	0.228248	0.007136	31.985	12838
Guanzhuang	Baojianshan	Mbuti	0.281496	0.00309	91.109	305388		Guanzhuang_o	Poland_Southeast_CordedWare.SG	Mbuti	0.228121	0.006505	35.066	14429
Guanzhuang	Mixtec_1.DG	Mbuti	0.281366	0.002931	95.99	517533		Guanzhuang_o	Adygei.SDG	Mbuti	0.22804	0.005588	40.806	15673
Guanzhuang	Guadeloupe_AnseGourde_Ceramic	Mbuti	0.281357	0.002895	97.189	280274		Guanzhuang_o	Orcadian.SDG	Mbuti	0.228034	0.005678	40.161	15683
Guanzhuang	Argentina_ArroyoSeco2_7200BP	Mbuti	0.281338	0.003985	70.605	87600		Guanzhuang_o	Russia_Yaroslavl_Fatyanovo_BA.SG	Mbuti	0.227981	0.006758	33.734	14121
Guanzhuang	Japan_HG_Jomon	Mbuti	0.281335	0.002935	95.841	376004		Guanzhuang_o	GIH_o.SG	Mbuti	0.227942	0.007551	30.185	13478
Guanzhuang	Bahamas_SouthAndros_Ceramic_published	Mbuti	0.281332	0.003445	81.672	131661		Guanzhuang_o	Portugal_C.SG	Mbuti	0.227926	0.008139	28.003	12375
Guanzhuang	Baja_Mexico.SG	Mbuti	0.281265	0.003979	70.682	74060		Guanzhuang_o	Russia_Samara_EBA_Yamnaya_published2	Mbuti	0.22784	0.008542	26.674	12101
Guanzhuang	Peru_SanSebastian_LH_500BP	Mbuti	0.281109	0.003511	80.065	126850		Guanzhuang_o	CLM.SG	Mbuti	0.227806	0.005181	43.97	16270
Guanzhuang	Xinj_U_IA	Mbuti	0.281098	0.002975	94.5	470988		Guanzhuang_o	Uzbekistan_Dzharkutan_BA_1	Mbuti	0.227799	0.007511	30.327	11296
Guanzhuang	Argentina_BeagleChannel_Yamana_1500BP	Mbuti	0.280836	0.003324	84.484	204466		Guanzhuang_o	Icelandic.DG	Mbuti	0.227596	0.006249	36.423	14160
Guanzhuang	PuertoRico_PuntaCandelero_Ceramic	Mbuti	0.280772	0.00307	91.455	218858		Guanzhuang_o	Norway_Viking.SG	Mbuti	0.227579	0.00576	39.512	15594
Guanzhuang	Brazil_LapaDoSanto_9600BP_published	Mbuti	0.280654	0.002963	94.732	313406		Guanzhuang_o	Pakistan_Katelai_IA	Mbuti	0.227519	0.006555	34.709	12840
Guanzhuang	Mongolia_Arkhangai_XiongnuEarlyMedieval_3	Mbuti	0.280602	0.002529	110.966	529390		Guanzhuang_o	Sweden_LN.SG	Mbuti	0.227415	0.008166	27.85	11915
Guanzhuang	Mongolia_Dornod_LatEMedieval_o	Mbuti	0.280136	0.002914	96.126	428577		Guanzhuang_o	Latvia_HG.SG	Mbuti	0.227343	0.008314	27.345	13418
Guanzhuang	Teleut.SG	Mbuti	0.280105	0.002688	104.217	536050		Guanzhuang_o	Pakistan_H_Aligrama	Mbuti	0.227298	0.007366	30.859	12620
Guanzhuang	Peru_Cuncaicha_3300BP_contam	Mbuti	0.279862	0.003067	91.263	298974		Guanzhuang_o	CEU.SG	Mbuti	0.227091	0.005524	41.106	15973
Guanzhuang	Brazil_LapaDoSanto_9600BP	Mbuti	0.27985	0.002824	99.104	351580		Guanzhuang_o	Denmark_Viking.SG	Mbuti	0.227072	0.00555	40.915	15959
Guanzhuang	USA_CA_Late_SanNicolas_o.SG	Mbuti	0.279826	0.005744	48.716	26488		Guanzhuang_o	GBR.SG	Mbuti	0.227063	0.005563	40.817	15940
Guanzhuang	BYH_HE	Mbuti	0.279817	0.003025	92.491	368729		Guanzhuang_o	Russia_Andronovo.SG	Mbuti	0.226953	0.006949	32.659	13948
Guanzhuang	Peru_Cuncaicha_4200BP	Mbuti	0.279758	0.003117	89.754	257279		Guanzhuang_o	Adygei.DG	Mbuti	0.226887	0.006348	35.741	14120
Guanzhuang	Mongolia_LBA_MongunTaiga_1	Mbuti	0.279686	0.003431	81.512	170020		Guanzhuang_o	Brahui.DG	Mbuti	0.226823	0.006121	37.056	14055
Guanzhuang	Argentina_NorthTierradelFuego_LaArcillosa2_5800BP	Mbuti	0.279234	0.003152	88.598	262997		Guanzhuang_o	Italy_Imperial_o5.SG	Mbuti	0.226616	0.008812	25.717	11416
Guanzhuang	JRTG_IA3	Mbuti	0.278967	0.003859	72.286	90383		Guanzhuang_o	Italy_IA_Republic.SG	Mbuti	0.226585	0.006266	36.161	14564
Guanzhuang	Argentina_BeagleChannel_Yamana_100BP.SG	Mbuti	0.278934	0.002968	93.968	281092		Guanzhuang_o	Russia_Viking.SG	Mbuti	0.226549	0.006007	37.715	15082
Guanzhuang	Kazakhstan_Berel_IA_o2	Mbuti	0.278623	0.003002	92.823	391026		Guanzhuang_o	Denmark_EarlyViking.SG	Mbuti	0.226524	0.006832	33.157	14173
Guanzhuang	Argentina_LagunaToro_2400BP	Mbuti	0.278481	0.004389	63.457	64705		Guanzhuang_o	Poland_GAC.SG	Mbuti	0.22651	0.008675	26.109	12184
Guanzhuang	JRTG_HE	Mbuti	0.27834	0.003118	89.27	499983		Guanzhuang_o	Basque.DG	Mbuti	0.22646	0.006228	36.363	14099
Guanzhuang	Mayan.SG	Mbuti	0.278298	0.003001	92.736	526977		Guanzhuang_o	Sweden_Viking.SG	Mbuti	0.226456	0.005579	40.588	16185
Guanzhuang	KLTS_IA	Mbuti	0.27814	0.002971	93.616	354744		Guanzhuang_o	Spanish.DG	Mbuti	0.226454	0.006199	36.533	14100
Guanzhuang	Japan_HG_Jomon_brother.I13886	Mbuti	0.278056	0.00328	84.769	194994		Guanzhuang_o	Norway_Medieval.SG	Mbuti	0.226407	0.007902	28.652	13532
Guanzhuang	Malaysia_Jehai_dup.JHM06.SG	Mbuti	0.277832	0.002892	96.082	526498		Guanzhuang_o	Germany_BellBeaker	Mbuti	0.226239	0.006052	37.383	14317
Guanzhuang	AYSG_HE	Mbuti	0.27742	0.003659	75.823	121926		Guanzhuang_o	Russia_Alan.SG	Mbuti	0.22614	0.006313	35.822	14231
Guanzhuang	Japan_Jomon_lc.SG	Mbuti	0.277078	0.01143	24.241	6563		Guanzhuang_o	Spain_EN.SG	Mbuti	0.225961	0.007537	29.981	13760
Guanzhuang	USA_CA_Chumash_mother.or.daughter.PS-18.SG	Mbuti	0.277016	0.005708	48.535	27646		Guanzhuang_o	Luxembourg_Loschbour.DG	Mbuti	0.225908	0.007597	29.736	12745
Guanzhuang	Mongolia_Arkhangai_EarlyMedieval_o	Mbuti	0.276573	0.002596	106.528	503809		Guanzhuang_o	Brahui.SDG	Mbuti	0.225748	0.005351	42.187	15795
Guanzhuang	Kazakh.SG	Mbuti	0.276545	0.002624	105.392	543697		Guanzhuang_o	Hungary_EBA_BellBeaker	Mbuti	0.225733	0.006732	33.531	13031
Guanzhuang	Russia_IA_2.SG	Mbuti	0.276519	0.003036	91.08	353841		Guanzhuang_o	Ukraine_Medieval.SG	Mbuti	0.22546	0.008543	26.391	12588
Guanzhuang	Kazakhstan_Kipchak2.SG	Mbuti	0.276419	0.002864	96.52	429191		Guanzhuang_o	Lebanon_Roman.SG	Mbuti	0.225422	0.00686	32.858	13685
Guanzhuang	Russia_HG_Tyumen_contam	Mbuti	0.276313	0.009668	28.581	9192		Guanzhuang_o	Pakistan_H_Barikot	Mbuti	0.225387	0.008076	27.91	10759
Guanzhuang	Tubalar.DG	Mbuti	0.276184	0.002679	103.101	532165		Guanzhuang_o	Russia_MLBA_Sintashta	Mbuti	0.225312	0.006204	36.315	14354
Guanzhuang	SSG_IA4	Mbuti	0.276023	0.00325	84.928	166683		Guanzhuang_o	Russia_Kalmykia_EBA_Yamnaya.SG	Mbuti	0.225274	0.007173	31.404	12856
Guanzhuang	Canada_700BP.SG	Mbuti	0.275667	0.005336	51.661	40892		Guanzhuang_o	Bulgarian.DG	Mbuti	0.22513	0.006283	35.83	14109
Guanzhuang	Russia_Siberia_Tenisei_EBA	Mbuti	0.275375	0.003068	89.759	315588		Guanzhuang_o	Scotland_Megalithic.SG	Mbuti	0.225127	0.008488	26.521	11158
Guanzhuang	Thailand_IA	Mbuti	0.275371	0.010021	27.481	7652		Guanzhuang_o	Italy_Sardinia_BA_Nuragic_o	Mbuti	0.225086	0.008364	26.911	10861
Guanzhuang	Mongolia_Khuvsgul_MLBALatEMedieval	Mbuti	0.275122	0.002651	103.771	426543		Guanzhuang_o	Italy_LA.SG	Mbuti	0.225059	0.005693	39.531	15222
Guanzhuang	Cree2.DG	Mbuti	0.275	0.002996	91.8	520233		Guanzhuang_o	Italy_Medieval_EarlyModern_oCentralEuropean.SG	Mbuti	0.225008	0.005819	38.67	15029
Guanzhuang	Argentina_LagunaChica_6800BP	Mbuti	0.274929	0.003533	77.82	132142		Guanzhuang_o	Italy_LA_oCentralEuropean_o1CentralEuropean.SG	Mbuti	0.224916	0.006422	35.021	14270
Guanzhuang	Brazil_LapaDoSanto_9600BP_1d.rel.Lapa25	Mbuti	0.274723	0.003444	79.77	157632		Guanzhuang_o	Ireland_EN.SG	Mbuti	0.224826	0.00653	34.43	14320
Guanzhuang	Kazakhstan_Medieval_Nomad.SG	Mbuti	0.27472	0.002694	101.961	474902		Guanzhuang_o	Norway_Mesolithic.SG	Mbuti	0.224813	0.007634	29.447	13672
Guanzhuang	Altaian_o.SG	Mbuti	0.274703	0.002987	91.969	527145		Guanzhuang_o	Albanian.DG	Mbuti	0.224806	0.007324	30.694	13696
Guanzhuang	KFL_HE	Mbuti	0.274545	0.002997	91.599	345015		Guanzhuang_o	Russia_Kostenki14	Mbuti	0.224798	0.008342	26.948	12116
Guanzhuang	USA_Alaska_TrailCreek_9000BP.SG	Mbuti	0.274438	0.003378	81.239	169547		Guanzhuang_o	Portugal_MN.SG	Mbuti	0.22477	0.006037	37.233	14615
Guanzhuang	Kazakhstan_IA_Berel_Pazyryk	Mbuti	0.274263	0.002761	99.341	462580		Guanzhuang_o	Italy_IA_Republic_oEasternMediterranean.SG	Mbuti	0.224545	0.007616	29.484	12549
Guanzhuang	PEL.SG	Mbuti	0.27385	0.002552	107.306	591025		Guanzhuang_o	Iceland_Pre_Christian.SG	Mbuti	0.224436	0.0059	38.039	15188
Guanzhuang	Mongolia_Selenge_XiongnuMedieval	Mbuti	0.273522	0.002811	97.3	353137		Guanzhuang_o	Spain_BA.SG	Mbuti	0.22442	0.007759	28.925	12739
Guanzhuang	Karakalpak.SG	Mbuti	0.273117	0.002579	105.918	543675		Guanzhuang_o	Armenian.DG	Mbuti	0.224419	0.006138	36.563	14093
Guanzhuang	WZ_IA1	Mbuti	0.273011	0.005546	49.23	36139		Guanzhuang_o	Ireland_LN.SG	Mbuti	0.224314	0.006314	35.525	14429
Guanzhuang	DTLD_IA2	Mbuti	0.27272	0.002958	92.193	449216		Guanzhuang_o	Lezgin.DG	Mbuti	0.224266	0.006262	35.811	14084
Guanzhuang	Malaysia_Jehai.SG	Mbuti	0.27236	0.002821	96.534	526598		Guanzhuang_o	Italy_Imperial.SG	Mbuti	0.224259	0.005515	40.663	15566
Guanzhuang	SolomonIslands_500BP	Mbuti	0.272299	0.00297	91.686	359964		Guanzhuang_o	Basque.SDG	Mbuti	0.224197	0.00559	40.105	15749
Guanzhuang	Aleut.DG	Mbuti	0.27185	0.002623	103.646	532096		Guanzhuang_o	Latvia_BA	Mbuti	0.224159	0.007057	31.765	12340
Guanzhuang	TBLS_HE3	Mbuti	0.271812	0.003846	70.679	97942		Guanzhuang_o	Pakistan_Udegram_IA	Mbuti	0.224123	0.006716	33.37	12921
Guanzhuang	Mongolia_MBA_Munkhkhairkhan_2	Mbuti	0.271668	0.002999	90.577	316218		Guanzhuang_o	Spain_C_oSteppe	Mbuti	0.224104	0.007364	30.431	11623
Guanzhuang	Mongolia_Selenge_XiongnuMedieval_o1_dup.or.1d.rel.UGU002	Mbuti	0.270935	0.007447	36.382	15135		Guanzhuang_o	Kazakhstan_Maitan_MLBA_Alakul	Mbuti	0.224061	0.006963	32.18	12612
Guanzhuang	Tsimshian.SG	Mbuti	0.270844	0.003008	90.054	526610		Guanzhuang_o	England_Viking.SG	Mbuti	0.22406	0.0057	39.312	15631
Guanzhuang	Vanuatu_2200BP	Mbuti	0.270521	0.005598	48.326	29450		Guanzhuang_o	Spain_Islamic	Mbuti	0.224031	0.008091	27.689	10098
Guanzhuang	Hazara.SG	Mbuti	0.270509	0.002584	104.681	543632		Guanzhuang_o	Iran_Wezmeh_N.SG	Mbuti	0.223904	0.008218	27.245	13809
Guanzhuang	KLTS_IA_K	Mbuti	0.27039	0.003346	80.821	181867		Guanzhuang_o	Latvia_HG	Mbuti	0.223895	0.007128	31.412	12307
Guanzhuang	China_Xinjian_IA.SG	Mbuti	0.270387	0.002733	98.92	371826		Guanzhuang_o	TSI.SG	Mbuti	0.223884	0.005437	41.177	16015
Guanzhuang	Hazara.DG	Mbuti	0.26971	0.00261	103.343	532765		Guanzhuang_o	Lebanon_MBA.SG	Mbuti	0.223719	0.006421	34.842	14366
Guanzhuang	Uyghur.DG	Mbuti	0.269587	0.002633	102.387	533745		Guanzhuang_o	Russia_Srubnaya	Mbuti	0.223707	0.006596	33.915	13835
Guanzhuang	Russia_KusnarenkovoKarajakupovo_Medieval.SG	Mbuti	0.269254	0.002909	92.548	435945		Guanzhuang_o	Russia_Samara_EBA_Yamnaya	Mbuti	0.223651	0.007076	31.609	12990
Guanzhuang	Mongolia_MBA_Munkhkhairkhan_2_dup.I13173	Mbuti	0.268759	0.003232	83.153	199003		Guanzhuang_o	Italian_Sardinian.SDG	Mbuti	0.223639	0.006391	34.992	14564
Guanzhuang	Russia_BA_Okunevo_1.or.2d.rel.I3426_dup.I3427.SG	Mbuti	0.268706	0.002963	90.69	512060		Guanzhuang_o	Sweden_Ansarve_Megalithic.SG	Mbuti	0.223597	0.006822	32.777	14312
Guanzhuang	Kazakhstan_Karakhanid.SG	Mbuti	0.26868	0.003034	88.558	290479		Guanzhuang_o	Russia_Ust_Ishim.DG	Mbuti	0.223569	0.007102	31.48	12740
Guanzhuang	Cree1.DG	Mbuti	0.268597	0.002923	91.897	520346		Guanzhuang_o	Italian_North.SDG	Mbuti	0.223492	0.005472	40.845	15787
Guanzhuang	Mongolia_Khovd_MLBAXiongnuLatEMedieval_o	Mbuti	0.268319	0.003193	84.022	243664		Guanzhuang_o	Kazakhstan_MLBA_OyDzhaylau	Mbuti	0.223439	0.008169	27.351	10569
Guanzhuang	Russia_Siberia_Lena_EBA_o	Mbuti	0.268286	0.00584	45.941	27520		Guanzhuang_o	Italy_IA_Republic_o.SG	Mbuti	0.223379	0.008244	27.096	13575
Guanzhuang	Canada_MDorset.SG	Mbuti	0.268244	0.005647	47.5	27202		Guanzhuang_o	Russia_MLBA_Krasnoyarsk	Mbuti	0.223319	0.006829	32.7	12712
Guanzhuang	Mansi.DG	Mbuti	0.268233	0.002611	102.729	533253		Guanzhuang_o	SSG_LBA	Mbuti	0.22329	0.008843	25.25	11582
Guanzhuang	Russia_UstBelaya_Angara_contam	Mbuti	0.267936	0.003476	77.083	127568		Guanzhuang_o	Makrani.DG	Mbuti	0.223247	0.006068	36.792	14048
Guanzhuang	Uyghur.SG	Mbuti	0.267898	0.002522	106.235	543687		Guanzhuang_o	Scotland_Viking_o.SG	Mbuti	0.223171	0.007912	28.205	12868
Guanzhuang	Longlin	Mbuti	0.267843	0.004375	61.227	63433		Guanzhuang_o	IBS.SG	Mbuti	0.223098	0.005437	41.034	16024
Guanzhuang	Kazakhstan_Karluk_1.SG	Mbuti	0.267793	0.00286	93.621	490102		Guanzhuang_o	Kazakhstan_MLBA_Aktogai	Mbuti	0.223017	0.007719	28.893	10476
Guanzhuang	Vanuatu_400BP	Mbuti	0.26764	0.002808	95.329	377605		Guanzhuang_o	Hungarian.DG	Mbuti	0.223013	0.006223	35.838	14107
Guanzhuang	Chukchi.DG	Mbuti	0.267532	0.002735	97.816	521467		Guanzhuang_o	Russia_Afanasievo.SG	Mbuti	0.222963	0.006745	33.058	14302
Guanzhuang	Kazakhstan_Kimak.SG	Mbuti	0.266795	0.003564	74.851	99457		Guanzhuang_o	Poland_BKG.SG	Mbuti	0.222914	0.006248	35.679	14730
Guanzhuang	Mixtec_2.DG	Mbuti	0.266547	0.002993	89.049	518696		Guanzhuang_o	Ireland_MN_contam.SG	Mbuti	0.222835	0.008299	26.852	14018
Guanzhuang	Russia_BA_Okunevo.SG	Mbuti	0.266542	0.002516	105.924	556600		Guanzhuang_o	Turkmenistan_IA.SG	Mbuti	0.222831	0.008616	25.863	11632
Guanzhuang	Kazakhstan_Central_Steppe_EMBA.SG	Mbuti	0.266091	0.002688	98.98	536694		Guanzhuang_o	Turkey_N.DG	Mbuti	0.222783	0.007157	31.129	13673
Guanzhuang	Turkey_OttomanPeriod_Tajik_Turkic_possible.SG	Mbuti	0.265959	0.003137	84.77	263367		Guanzhuang_o	Romania_PesteraMuierii_EUP	Mbuti	0.222782	0.008045	27.691	13969
Guanzhuang	Vanuatu_2000BP	Mbuti	0.265899	0.003609	73.682	140638		Guanzhuang_o	Ireland_Mesolithic.SG	Mbuti	0.222769	0.007389	30.15	14027
Guanzhuang	Aleut_o.DG	Mbuti	0.265859	0.002756	96.458	520477		Guanzhuang_o	Ireland_Megalithic.SG	Mbuti	0.222693	0.00619	35.975	14608
Guanzhuang	PuertoRico_PasodelIndio_Ceramic_o	Mbuti	0.265564	0.004329	61.348	54877		Guanzhuang_o	Portugal_C	Mbuti	0.222677	0.0069	32.274	12253
Guanzhuang	Tatar_Tomsk.SG	Mbuti	0.265508	0.002654	100.025	537270		Guanzhuang_o	Uzbekistan_Bustan_BA	Mbuti	0.222622	0.008178	27.223	10339
Guanzhuang	DTLD_HE	Mbuti	0.265468	0.003362	78.972	151790		Guanzhuang_o	Romania_C_oHG.SG	Mbuti	0.22262	0.008316	26.771	13373
Guanzhuang	Khonda_Dora.DG	Mbuti	0.265196	0.002633	100.714	518825		Guanzhuang_o	Russia_Moscow_Fatyanovo_BA.SG	Mbuti	0.222581	0.008199	27.146	12072
Guanzhuang	SMTS_HE	Mbuti	0.265128	0.004117	64.4	71412		Guanzhuang_o	Poland_Koszyce_GAC.SG	Mbuti	0.222482	0.006238	35.663	14748
Guanzhuang	Peru_HuacaPrieta_LA_4500BP	Mbuti	0.264974	0.011463	23.116	6110		Guanzhuang_o	Spain_MLN	Mbuti	0.222433	0.006528	34.076	13827
Guanzhuang	Russia_BA_Okunevo.SG_1d.rel.RISE515.SG	Mbuti	0.264719	0.004499	58.835	51114		Guanzhuang_o	Denmark_IA.SG	Mbuti	0.222231	0.006999	31.751	14220
Guanzhuang	BYH_IA1	Mbuti	0.264682	0.002974	88.997	361036		Guanzhuang_o	Czech.DG	Mbuti	0.222222	0.0068	32.678	13699
Guanzhuang	Russia_BA_Okunevo_dup.I3426.SG	Mbuti	0.264454	0.003198	82.689	173394		Guanzhuang_o	Cretan.DG	Mbuti	0.222156	0.006218	35.729	14120
Guanzhuang	Russia_BA_Okunevo_brother.I2078.SG	Mbuti	0.264395	0.003105	85.144	241194		Guanzhuang_o	Scotland_N	Mbuti	0.222124	0.006325	35.118	13762
Guanzhuang	Kazakhstan_Central_Saka.SG	Mbuti	0.264174	0.002566	102.963	516722		Guanzhuang_o	Italian_North.DG	Mbuti	0.222069	0.007028	31.598	13698
Guanzhuang	BIR.SG	Mbuti	0.264033	0.002329	113.377	552767		Guanzhuang_o	Italy_Sicily_MN	Mbuti	0.222067	0.006789	32.708	12850
Guanzhuang	Mongolia_Xiongnu_o2.SG	Mbuti	0.26398	0.002727	96.794	486095		Guanzhuang_o	Italy_Sardinia_BA_Nuragic	Mbuti	0.222055	0.006652	33.379	13725
Guanzhuang	Kazakhstan_Kanai_MBA	Mbuti	0.263899	0.004757	55.476	47387		Guanzhuang_o	Poland_TRB.SG	Mbuti	0.222022	0.007506	29.58	13226
Guanzhuang	Uzbek.SG	Mbuti	0.263729	0.002513	104.948	544425		Guanzhuang_o	Georgian.DG	Mbuti	0.221973	0.006083	36.49	14097
Guanzhuang	Mongolia_Sukhbaatar_Xiongnu_o	Mbuti	0.263377	0.003042	86.589	340031		Guanzhuang_o	Spain_MBA	Mbuti	0.221937	0.008621	25.745	10121
Guanzhuang	Mexico_Pericues_lc.SG	Mbuti	0.263248	0.008729	30.156	10694		Guanzhuang_o	England_IA_Roman.SG	Mbuti	0.221918	0.006252	35.494	14505
Guanzhuang	BIR_o.SG	Mbuti	0.262974	0.002745	95.802	523323		Guanzhuang_o	Italy_N.SG	Mbuti	0.221908	0.006079	36.507	14727
Guanzhuang	JAR.SG	Mbuti	0.26293	0.002588	101.59	537879		Guanzhuang_o	Italy_Medieval_EarlyModern.SG	Mbuti	0.221888	0.005651	39.268	15241
Guanzhuang	Russia_BA_Okunevo.SG_sister.RISE672.SG	Mbuti	0.262849	0.003106	84.637	251811		Guanzhuang_o	Makrani.SDG	Mbuti	0.221814	0.005291	41.919	15812
Guanzhuang	Kazakhstan_Karluk_2.SG	Mbuti	0.262777	0.002879	91.263	336446		Guanzhuang_o	Spain_HG.SG	Mbuti	0.221604	0.008174	27.112	11216
Guanzhuang	G218_HE	Mbuti	0.262658	0.002833	92.706	443531		Guanzhuang_o	Poland_Koszyce_GAC.SG_son.RISE1166.SG.brother.RISE1167.SG	Mbuti	0.221552	0.008575	25.837	12565
Guanzhuang	ONG.SG	Mbuti	0.262566	0.002556	102.733	541789		Guanzhuang_o	Romania_IronGates_Mesolithic.SG	Mbuti	0.22155	0.007156	30.958	14019
Guanzhuang	ZGLK_IA3	Mbuti	0.262489	0.003215	81.635	157936		Guanzhuang_o	Sardinian.SDG	Mbuti	0.221474	0.005544	39.946	15776
Guanzhuang	Kazakhstan_CentralSaka_o1.SG	Mbuti	0.262333	0.003201	81.958	213357		Guanzhuang_o	Poland_Koszyce_GAC.SG_mother.RISE1163.SG.mother.RISE1173.SG	Mbuti	0.221352	0.008575	25.812	12895
Guanzhuang	BLT_IA	Mbuti	0.262323	0.003271	80.185	205514		Guanzhuang_o	Armenia_C	Mbuti	0.221288	0.007535	29.368	11474
Guanzhuang	WZ_IA4	Mbuti	0.26202	0.002916	89.842	459862		Guanzhuang_o	Portugal_LN_C.SG	Mbuti	0.221259	0.006761	32.724	14176
Guanzhuang	Kazakhstan_Berel_IA_o1	Mbuti	0.261816	0.003154	83.016	234212		Guanzhuang_o	Turkmenistan_C_Parkhai	Mbuti	0.221163	0.007781	28.422	10439
Guanzhuang	Russia_Bolshoy	Mbuti	0.261765	0.002525	103.664	437714		Guanzhuang_o	Bergamo.DG	Mbuti	0.221091	0.007097	31.152	13688
Guanzhuang	Russia_Gorokhov_IA_1	Mbuti	0.261511	0.010418	25.102	7621		Guanzhuang_o	Serbia_IronGates_Mesolithic	Mbuti	0.221042	0.006413	34.47	14595
Guanzhuang	Russia_Medieval_Nomad.SG	Mbuti	0.261031	0.002958	88.255	325906		Guanzhuang_o	Spain_Greek_oLocal	Mbuti	0.220951	0.008291	26.65	10138
Guanzhuang	Russia_IA_3.SG	Mbuti	0.260832	0.002639	98.849	482367		Guanzhuang_o	Lithuania_EMN_Narva	Mbuti	0.220906	0.007315	30.199	12643
Guanzhuang	Mongolia_EIA_Sagly_4	Mbuti	0.260777	0.002379	109.603	534143		Guanzhuang_o	Ireland_EN_MN.SG	Mbuti	0.220871	0.00627	35.225	14419
Guanzhuang	Kazakhstan_Berel_IA	Mbuti	0.260707	0.002441	106.803	550964		Guanzhuang_o	Polish.DG	Mbuti	0.220802	0.007083	31.172	13680
Guanzhuang	JMCY_IA1	Mbuti	0.260605	0.002885	90.34	371152		Guanzhuang_o	Poland_Southeast_BellBeaker.SG	Mbuti	0.220712	0.008983	24.571	10179
Guanzhuang	Vanuatu_400BP_contam	Mbuti	0.260313	0.003217	80.913	204929		Guanzhuang_o	Italy_Mesolithic.SG	Mbuti	0.220655	0.006918	31.895	14121
Guanzhuang	ZGLK_IA2	Mbuti	0.260306	0.002785	93.452	390378		Guanzhuang_o	TBLS_LBA	Mbuti	0.220653	0.009159	24.091	10507
Guanzhuang	XKKD_HE	Mbuti	0.260223	0.003203	81.238	184472		Guanzhuang_o	Turkey_Arslantepe_LateC	Mbuti	0.220616	0.006252	35.287	13810
Guanzhuang	Norway_Viking_o1.SG	Mbuti	0.260031	0.003413	76.194	181087		Guanzhuang_o	Lebanon_IA3.SG	Mbuti	0.220498	0.006143	35.892	14543
Guanzhuang	Mongolia_Khovd_MLBA	Mbuti	0.259791	0.002758	94.211	362772		Guanzhuang_o	Tuscan_1.DG	Mbuti	0.220481	0.006246	35.3	14105
Guanzhuang	ZGLK_IA4	Mbuti	0.259772	0.005894	44.076	24379		Guanzhuang_o	Ireland_Viking.SG	Mbuti	0.220277	0.006788	32.449	14056
Guanzhuang	Russia_Gorokhov_IA_3	Mbuti	0.259485	0.010759	24.118	6819		Guanzhuang_o	Ukraine_Viking.SG	Mbuti	0.220182	0.009196	23.944	10617
Guanzhuang	RAJ.SG	Mbuti	0.259483	0.002345	110.645	566037		Guanzhuang_o	IBS_CanaryIslands.SG	Mbuti	0.220054	0.006936	31.727	14113
Guanzhuang	DTLD_IA1	Mbuti	0.259286	0.002942	88.127	323730		Guanzhuang_o	England_BellBeaker	Mbuti	0.220014	0.006406	34.344	13747
Guanzhuang	Bashkir_o.SG	Mbuti	0.259182	0.002848	91.016	528005		Guanzhuang_o	Russia_Sunghir4.SG	Mbuti	0.219829	0.007938	27.693	13629
Guanzhuang	Bougainville.DG	Mbuti	0.258963	0.002623	98.713	526111		Guanzhuang_o	Croatia_C_Lasinja	Mbuti	0.219725	0.006489	33.859	13553
Guanzhuang	Argentina_LagunaChica_6800BP_published	Mbuti	0.258748	0.007566	34.201	13139		Guanzhuang_o	Netherlands_BellBeaker	Mbuti	0.219709	0.007798	28.173	10465
Guanzhuang	Kazakhstan_Central_Tasmola_o2.SG	Mbuti	0.258467	0.009138	28.286	9217		Guanzhuang_o	Spain_HG_brother.I0585	Mbuti	0.219652	0.008579	25.604	11021
Guanzhuang	ZGLK_IA_K	Mbuti	0.258454	0.00274	94.316	354970		Guanzhuang_o	Armenia_EBA	Mbuti	0.21965	0.007999	27.461	10950
Guanzhuang	EMHJ_IA	Mbuti	0.258397	0.003099	83.38	243180		Guanzhuang_o	Switzerland_Bichon.SG	Mbuti	0.219543	0.007988	27.484	13797
Guanzhuang	Mongolia_EIA_5	Mbuti	0.258367	0.003117	82.878	258229		Guanzhuang_o	Poland_Ksiaznice_GAC.SG	Mbuti	0.219252	0.007647	28.673	12405
Guanzhuang	Indian_GreatAndaman_100BP.SG	Mbuti	0.258122	0.002761	93.481	513666		Guanzhuang_o	Italy_Sardinia_EBA	Mbuti	0.219186	0.006328	34.638	13897
Guanzhuang	Mongolia_Khovd_MLBAEarlyMedieval	Mbuti	0.258112	0.002535	101.826	451644		Guanzhuang_o	Hungary_Langobard	Mbuti	0.219145	0.007064	31.021	12370
Guanzhuang	DTLD_IA_K	Mbuti	0.258107	0.003176	81.268	180791		Guanzhuang_o	Spain_EBA	Mbuti	0.219014	0.00656	33.388	13853
Guanzhuang	China_Tianyuan	Mbuti	0.258066	0.002976	86.703	347542		Guanzhuang_o	Italy_IA_Republic_oEasternMediterranean_o.SG	Mbuti	0.219003	0.008867	24.699	10471
Guanzhuang	Vanuatu_2600BP	Mbuti	0.258034	0.003013	85.655	256489		Guanzhuang_o	Druze.SDG	Mbuti	0.21888	0.005318	41.158	15912
Guanzhuang	KQKS_HE	Mbuti	0.257852	0.003276	78.7	161226		Guanzhuang_o	Italy_Imperial_o4.SG	Mbuti	0.218857	0.006384	34.28	14283
Guanzhuang	Mongolia_LBA_MongunTaiga_3	Mbuti	0.257785	0.002532	101.821	429196		Guanzhuang_o	Romania_C_Bodrogkeresztur	Mbuti	0.218758	0.00805	27.176	10850
Guanzhuang	Maori.DG	Mbuti	0.257683	0.002774	92.893	520879		Guanzhuang_o	Jew_Iraqi.DG	Mbuti	0.218752	0.006005	36.43	14023
Guanzhuang	Vanuatu_200BP_oPolynesian	Mbuti	0.257593	0.003326	77.449	137615		Guanzhuang_o	Sardinian.DG	Mbuti	0.218682	0.005825	37.542	14384
Guanzhuang	Vanuatu_2500BP	Mbuti	0.257481	0.003249	79.246	124213		Guanzhuang_o	Switzerland_LN	Mbuti	0.218681	0.006538	33.449	13348
Guanzhuang	Vanuatu_1100BP	Mbuti	0.257386	0.003112	82.695	234802		Guanzhuang_o	England_C_EBA	Mbuti	0.218677	0.006899	31.697	12580
Guanzhuang	Turkmen.SG	Mbuti	0.257228	0.002512	102.391	537332		Guanzhuang_o	Turkey_EBA_II.SG	Mbuti	0.218656	0.007838	27.898	12422
Guanzhuang	Russia_EasternScythian_SouthernUrals.SG	Mbuti	0.257174	0.003343	76.92	174356		Guanzhuang_o	Hungary_LateC_Protoboleraz_published	Mbuti	0.218615	0.00838	26.088	10877
Guanzhuang	USA_AK_Prehistoric.SG	Mbuti	0.257168	0.008518	30.192	11007		Guanzhuang_o	Spain_C	Mbuti	0.218564	0.006268	34.873	14138
Guanzhuang	ZGLK_IA1	Mbuti	0.256991	0.00259	99.21	526234		Guanzhuang_o	Hungary_BA.SG	Mbuti	0.218438	0.008333	26.213	13887
Guanzhuang	Mongolia_Uvs_EIAXiongnuLateMedival	Mbuti	0.256818	0.00249	103.134	519796		Guanzhuang_o	England_N	Mbuti	0.218366	0.006862	31.822	12953
Guanzhuang	Vanuatu_1200BP	Mbuti	0.256781	0.002759	93.056	349552		Guanzhuang_o	Russia_North_Caucasus_MBA	Mbuti	0.218253	0.008362	26.102	10035
Guanzhuang	Mongolia_EIA_Pazyryk_6	Mbuti	0.256694	0.002968	86.488	305786		Guanzhuang_o	England_N.SG	Mbuti	0.218079	0.006303	34.6	14614
Guanzhuang	Russia_Tuva_IA_AldyBel	Mbuti	0.25639	0.002798	91.636	319401		Guanzhuang_o	Ireland_MN.SG	Mbuti	0.21802	0.005641	38.648	15414
Guanzhuang	BEN.SG	Mbuti	0.255925	0.00268	95.494	524120		Guanzhuang_o	Turkey_EBA	Mbuti	0.217978	0.00823	26.486	11167
Guanzhuang	Mongolia_Khuvsgul_XiongnuLatEMedieval_1	Mbuti	0.255739	0.002525	101.301	470746		Guanzhuang_o	Iran_GanjDareh_N	Mbuti	0.217925	0.007607	28.647	11901
Guanzhuang	Mongolia_LBA_CenterWest_5	Mbuti	0.255729	0.002626	97.386	466183		Guanzhuang_o	Hungary_LateC_Baden	Mbuti	0.217857	0.007071	30.81	12420
Guanzhuang	Russia_Sargat_IA	Mbuti	0.255682	0.002394	106.8	537056		Guanzhuang_o	Poland_Koszyce_GAC.SG_daughter.RISE1170.SG.sister.RISE1164.SG	Mbuti	0.217784	0.008622	25.259	12930
Guanzhuang	SSG_IA2	Mbuti	0.255514	0.002817	90.706	279856		Guanzhuang_o	Turkey_N_published	Mbuti	0.217528	0.006933	31.377	12692
Guanzhuang	Kazakhstan_Central_Saka.SG_father.or.son.DA13.SG	Mbuti	0.255208	0.005327	47.912	35732		Guanzhuang_o	Russia_Sunghir3.SG	Mbuti	0.217427	0.008138	26.719	13847
Guanzhuang	Vanuatu_400BP_o	Mbuti	0.255071	0.002997	85.121	214804		Guanzhuang_o	Poland_BellBeaker	Mbuti	0.217389	0.008038	27.046	10221
Guanzhuang	Mongolia_Khuvsgul_Xiongnu	Mbuti	0.255	0.003461	73.669	162636		Guanzhuang_o	India_RoopkundB	Mbuti	0.217279	0.007451	29.162	11209
Guanzhuang	Bashkir.SG	Mbuti	0.254852	0.002621	97.218	538351		Guanzhuang_o	Samaritan.DG	Mbuti	0.217142	0.006955	31.22	13568
Guanzhuang	Mongolia_EIA_2	Mbuti	0.254844	0.003043	83.748	303383		Guanzhuang_o	Lebanon_ERoman.SG	Mbuti	0.217045	0.006367	34.089	14332
Guanzhuang	Vanuatu_500BP_published	Mbuti	0.254807	0.002883	88.373	319775		Guanzhuang_o	Romania_IronGates_Mesolithic	Mbuti	0.217025	0.007916	27.417	11891
Guanzhuang	JMCY_IA2	Mbuti	0.254522	0.00287	88.679	467616		Guanzhuang_o	Portugal_MBA.SG	Mbuti	0.216896	0.006757	32.099	13585
Guanzhuang	China_AmurRiver_Paleolithic	Mbuti	0.254496	0.00298	85.399	410607		Guanzhuang_o	Italy_Medieval.SG	Mbuti	0.216876	0.007224	30.023	13543
Guanzhuang	Russia_MLBA_Krasnoyarsk_o	Mbuti	0.254455	0.002921	87.103	323687		Guanzhuang_o	Austria_N_LBK_published	Mbuti	0.216793	0.007679	28.233	11023
Guanzhuang	Kazakhstan_Botai_Eneolithic.SG	Mbuti	0.254395	0.002548	99.823	543449		Guanzhuang_o	Uzbekistan_SappaliTepe_BA	Mbuti	0.216653	0.00647	33.486	13827
Guanzhuang	China_Xinjian_IA_o1.SG	Mbuti	0.253911	0.003184	79.746	152350		Guanzhuang_o	Spain_EN	Mbuti	0.216645	0.007074	30.627	11862
Guanzhuang	WLBL_IA2	Mbuti	0.253851	0.002835	89.531	350003		Guanzhuang_o	Russia_MBA_Poltavka_published	Mbuti	0.21638	0.007832	27.626	11815
Guanzhuang	MXL.SG	Mbuti	0.253843	0.002365	107.32	600822		Guanzhuang_o	Serbia_IronGates_Mesolithic_published	Mbuti	0.216214	0.008682	24.904	10103
Guanzhuang	Kazakhstan_IA_Tasbas	Mbuti	0.253806	0.003315	76.553	167169		Guanzhuang_o	Druze.DG	Mbuti	0.216201	0.006103	35.425	14076
Guanzhuang	Laos_Hoabinhian.SG	Mbuti	0.253782	0.003127	81.162	227188		Guanzhuang_o	Turkey_Alalakh_MLBA	Mbuti	0.216026	0.006199	34.846	13957
Guanzhuang	Aleut_o1.DG	Mbuti	0.253681	0.002663	95.271	522387		Guanzhuang_o	Russia_Steppe_Eneolithic	Mbuti	0.215931	0.008132	26.552	10656
Guanzhuang	ABST_HE	Mbuti	0.253651	0.003271	77.539	152233		Guanzhuang_o	Croatia_MN_Sopot	Mbuti	0.215777	0.007948	27.148	10905
Guanzhuang	Kazakhstan_Botai_Eneolithic	Mbuti	0.253439	0.002695	94.042	382847		Guanzhuang_o	Jordanian.DG	Mbuti	0.215743	0.005876	36.719	14310
Guanzhuang	ILA.SG	Mbuti	0.253373	0.002317	109.363	559009		Guanzhuang_o	Italy_Sardinia_C_BA.SG	Mbuti	0.215593	0.007676	28.088	12467
Guanzhuang	Kazakhstan_IA_Saka_dup.I7110.SG	Mbuti	0.25317	0.002916	86.835	469824		Guanzhuang_o	Palestinian.DG	Mbuti	0.21559	0.005764	37.402	14327
Guanzhuang	Moldova_Cimmerian.SG	Mbuti	0.25314	0.002693	93.987	354118		Guanzhuang_o	Ireland_N.SG	Mbuti	0.215575	0.007902	27.281	13899
Guanzhuang	Russia_Karasuk_oRISE.SG	Mbuti	0.252865	0.002446	103.377	551547		Guanzhuang_o	Poland_Koszyce_GAC.SG_daughter.RISE1166.SG.sister.RISE1171.SG	Mbuti	0.215568	0.00873	24.692	12475
Guanzhuang	Vanuatu_150BP	Mbuti	0.252795	0.002529	99.966	480346		Guanzhuang_o	Italy_Imperial_o1.SG	Mbuti	0.215478	0.007238	29.772	13349
Guanzhuang	SSG_IA1	Mbuti	0.252768	0.002724	92.785	320738		Guanzhuang_o	Russia_Kostenki14.SG	Mbuti	0.215412	0.008567	25.146	12194
Guanzhuang	Saami.DG	Mbuti	0.252753	0.002667	94.782	534440		Guanzhuang_o	Iran_C_TepeHissar	Mbuti	0.215162	0.007573	28.413	10099
Guanzhuang	UBR.SG	Mbuti	0.25241	0.002293	110.064	566998		Guanzhuang_o	Turkey_N	Mbuti	0.215142	0.006198	34.713	14297
Guanzhuang	LSH_IA1	Mbuti	0.252337	0.003575	70.584	121654		Guanzhuang_o	Italy_C.SG	Mbuti	0.215131	0.006805	31.612	14120
Guanzhuang	BEB.SG	Mbuti	0.252336	0.002259	111.681	597793		Guanzhuang_o	Italy_Imperial_o3.SG	Mbuti	0.215093	0.007817	27.518	12580
Guanzhuang	WLBL_IA_K	Mbuti	0.252109	0.003084	81.759	332696		Guanzhuang_o	Italy_Imperial_oCentralEuropean.SG	Mbuti	0.214866	0.007698	27.91	12386
Guanzhuang	Kazakhstan_Nomad_IA.SG	Mbuti	0.252063	0.002741	91.959	362669		Guanzhuang_o	Bulgaria_C	Mbuti	0.214778	0.007553	28.437	11388
Guanzhuang	XSQG_HE	Mbuti	0.251842	0.003396	74.166	141609		Guanzhuang_o	Russia_Sunghir2.SG	Mbuti	0.214626	0.007881	27.233	13617
Guanzhuang	Relli_1.DG	Mbuti	0.251751	0.002503	100.565	520013		Guanzhuang_o	Jordan_LBA	Mbuti	0.214395	0.006337	33.83	13975
Guanzhuang	Mari.SG	Mbuti	0.251657	0.002891	87.039	510224		Guanzhuang_o	Italy_Medieval_o2.SG	Mbuti	0.214279	0.009265	23.127	10079
Guanzhuang	PEL_SomeAfrican.SG	Mbuti	0.251627	0.002371	106.131	571444		Guanzhuang_o	Turkey_OldHittitePeriod.SG	Mbuti	0.214213	0.0079	27.114	12694
Guanzhuang	BYH_IA2	Mbuti	0.251366	0.002891	86.952	321018		Guanzhuang_o	PUR.SG	Mbuti	0.214162	0.004993	42.895	16391
Guanzhuang	Vanuatu_2400BP	Mbuti	0.251255	0.009036	27.806	9584		Guanzhuang_o	Lebanon_IA3_o2.SG	Mbuti	0.21408	0.008707	24.587	11092
Guanzhuang	CGGL_IA	Mbuti	0.251052	0.00297	84.532	228981		Guanzhuang_o	Lebanon_Medieval_o1.SG	Mbuti	0.214002	0.008343	25.65	12398
Guanzhuang	Vanuatu_1300BP	Mbuti	0.250984	0.002709	92.661	405145		Guanzhuang_o	Poland_Koszyce_GAC.SG_brother.RISE1169.SG.brother.RISE1168.SG.brother.RISE1163.SG	Mbuti	0.213672	0.008341	25.616	12816
Guanzhuang	Mongolia_LBA_CenterWest_5_dup.I6362	Mbuti	0.250979	0.002893	86.744	344926		Guanzhuang_o	Jordan_LBA_IA	Mbuti	0.213632	0.008149	26.216	10544
Guanzhuang	Malaysia_Hoabinhian.WGC	Mbuti	0.250935	0.004088	61.384	55581		Guanzhuang_o	Turkey_N.SG	Mbuti	0.213584	0.006538	32.67	14425
Guanzhuang	Australian.DG	Mbuti	0.250538	0.002651	94.494	526571		Guanzhuang_o	Hungary_IA_Scythian.SG	Mbuti	0.213349	0.00765	27.889	12356
Guanzhuang	Vanuatu_1300BP_all	Mbuti	0.250504	0.002533	98.912	474243		Guanzhuang_o	Switzerland_EBA_2	Mbuti	0.213153	0.007001	30.447	12013
Guanzhuang	Ukraine_IA_WesternScythian_Cimmerians_o2.SG	Mbuti	0.250498	0.003487	71.841	116116		Guanzhuang_o	Turkey_Boncuklu_N.SG	Mbuti	0.212967	0.008054	26.443	12828
Guanzhuang	Kurumba.DG	Mbuti	0.250488	0.002579	97.127	516836		Guanzhuang_o	Turkey_Arslantepe_EBA	Mbuti	0.212901	0.00735	28.966	11895
Guanzhuang	Vanuatu_150BP_all	Mbuti	0.250411	0.00255	98.21	480528		Guanzhuang_o	Lebanon_Medieval.SG	Mbuti	0.212803	0.007376	28.849	13818
Guanzhuang	JMCY_HE3	Mbuti	0.250404	0.003204	78.16	178011		Guanzhuang_o	Poland_TRB_o.SG	Mbuti	0.212403	0.008516	24.942	11912
Guanzhuang	Bengali.DG	Mbuti	0.250396	0.002386	104.952	533094		Guanzhuang_o	BedouinB.SDG	Mbuti	0.212313	0.005266	40.319	15594
Guanzhuang	Kazakhstan_Kipchak1.SG	Mbuti	0.250345	0.002968	84.34	355485		Guanzhuang_o	IBS_o1.SG	Mbuti	0.212136	0.006858	30.934	14088
Guanzhuang	LSH_IA3	Mbuti	0.250308	0.008956	27.949	9663		Guanzhuang_o	Turkmenistan_C_Geoksyur	Mbuti	0.211906	0.007315	28.97	10910
Guanzhuang	Papuan.DG	Mbuti	0.250096	0.002575	97.12	543767		Guanzhuang_o	Austria_N_LBK	Mbuti	0.21188	0.007973	26.574	11407
Guanzhuang	QFQH_IA	Mbuti	0.250034	0.002891	86.484	460325		Guanzhuang_o	Ukraine_N	Mbuti	0.211872	0.007646	27.712	11118
Guanzhuang	TBLS_HE1	Mbuti	0.249634	0.002839	87.944	314070		Guanzhuang_o	BedouinB.DG	Mbuti	0.211871	0.006118	34.631	14021
Guanzhuang	Serbia_Medieval_Gepidian.SG	Mbuti	0.249529	0.003225	77.381	179890		Guanzhuang_o	Israel_C	Mbuti	0.211844	0.006983	30.339	11912
Guanzhuang	Russia_Gorokhov_IA_2	Mbuti	0.249416	0.009662	25.815	8995		Guanzhuang_o	Palestinian.SDG	Mbuti	0.211781	0.005156	41.078	16033
Guanzhuang	TBLS_IA1	Mbuti	0.249369	0.002523	98.846	518297		Guanzhuang_o	PUR_oEuropean.SG	Mbuti	0.211643	0.008134	26.02	13803
Guanzhuang	Mongolia_Arkhangai_Xiongnu	Mbuti	0.249333	0.002548	97.853	509954		Guanzhuang_o	Lebanon_Medieval_o4.SG	Mbuti	0.211418	0.008039	26.299	13265
Guanzhuang	Vanuatu_200BP	Mbuti	0.249286	0.002978	83.722	233238		Guanzhuang_o	Serbia_Mokrin_EBA_Maros_oAegean.SG	Mbuti	0.211416	0.008093	26.123	10945
Guanzhuang	WLBL_IA1	Mbuti	0.2492	0.002948	84.543	473756		Guanzhuang_o	Russia_MLBA_Sintashta.SG	Mbuti	0.211408	0.008154	25.928	10777
Guanzhuang	PEL_oHighEuropean.SG	Mbuti	0.249093	0.002724	91.455	532450		Guanzhuang_o	Spain_Roman	Mbuti	0.210564	0.007937	26.529	10156
Guanzhuang	Kapu.DG	Mbuti	0.248693	0.002398	103.702	532886		Guanzhuang_o	Israel_MLBA	Mbuti	0.210382	0.007163	29.372	11419
Guanzhuang	ABST_IA1	Mbuti	0.248673	0.002488	99.934	534130		Guanzhuang_o	Syria_Ebla_EMBA	Mbuti	0.210375	0.007133	29.495	12061
Guanzhuang	SPL_HE2	Mbuti	0.248483	0.006326	39.279	21115		Guanzhuang_o	Iran_C_SehGabi	Mbuti	0.210042	0.007252	28.962	11389
Guanzhuang	XSQG_HE_K	Mbuti	0.248387	0.009599	25.876	8716		Guanzhuang_o	Jew_Yemenite.DG	Mbuti	0.209364	0.006074	34.469	14017
Guanzhuang	G218_IA2	Mbuti	0.248316	0.003019	82.24	287060		Guanzhuang_o	Balochi_oAfrica.SDG	Mbuti	0.209062	0.005515	37.906	14828
Guanzhuang	Mongolia_Salkhit_UP.SG	Mbuti	0.248222	0.004294	57.813	66449		Guanzhuang_o	Ukraine_Globular_Amphora	Mbuti	0.208504	0.008041	25.929	10140
Guanzhuang	Mala.DG	Mbuti	0.248079	0.002372	104.584	540287		Guanzhuang_o	Turkey_CamlibelTarlasi_LateC	Mbuti	0.207934	0.006973	29.82	12599
Guanzhuang	Russia_EasternScythian_SouthernUrals_o.SG	Mbuti	0.247924	0.007016	35.335	15891		Guanzhuang_o	BedouinA.SDG	Mbuti	0.207724	0.004995	41.586	15942
Guanzhuang	Madiga.DG	Mbuti	0.247877	0.00249	99.558	532398		Guanzhuang_o	Serbia_EN	Mbuti	0.205958	0.007817	26.349	11008
Guanzhuang	ZGLK_IA_KL	Mbuti	0.247871	0.008086	30.656	12175		Guanzhuang_o	Italy_Imperial_oAfrica.SG	Mbuti	0.203406	0.008646	23.526	11377
Guanzhuang	AYSG_IA1	Mbuti	0.247797	0.004095	60.514	70222		Guanzhuang_o	CanaryIslands_Guanche.SG	Mbuti	0.196243	0.0068	28.86	14107
Guanzhuang	Vanuatu_2300BP	Mbuti	0.247681	0.00302	82.018	267863		Guanzhuang_o	ASW_oNativeAmerican.SG	Mbuti	0.190319	0.005151	36.95	14630
Guanzhuang	CSC_IA1	Mbuti	0.247667	0.002618	94.61	471371		Guanzhuang_o	Mozabite.SDG	Mbuti	0.189265	0.00494	38.312	15855
Guanzhuang	AXL_IA_K	Mbuti	0.24766	0.003031	81.713	223138		Guanzhuang_o	Href.REF	Mbuti	0.188001	0.008332	22.564	13874
Guanzhuang	Russia_Alan_o.SG	Mbuti	0.247546	0.004697	52.708	45006		Guanzhuang_o	Saharawi.DG	Mbuti	0.187088	0.00562	33.289	14000
Guanzhuang	SSG_IA3	Mbuti	0.247311	0.005472	45.194	29876		Guanzhuang_o	Mozabite.DG	Mbuti	0.185818	0.005543	33.524	14004
Guanzhuang	WTL_IA	Mbuti	0.247134	0.002512	98.386	531992		Guanzhuang_o	PEL_oHighAfrican.SG	Mbuti	0.183982	0.007475	24.613	13724
Guanzhuang	DML_IA	Mbuti	0.247128	0.002743	90.089	320338		Guanzhuang_o	Morocco_Iberomaurusian	Mbuti	0.170278	0.006376	26.705	12974
Guanzhuang	Russia_Chalmny_Varre	Mbuti	0.247093	0.002805	88.088	304491		Guanzhuang_o	ACB_o1.SG	Mbuti	0.168058	0.007574	22.189	13576
Guanzhuang	TBLS_IA_K	Mbuti	0.247002	0.00276	89.482	392170		Guanzhuang_o	ASW_oEuropean.SG	Mbuti	0.164399	0.00759	21.659	13228
Guanzhuang	G218_IA1	Mbuti	0.246659	0.002468	99.932	427145		Guanzhuang_o	Agaw.DG	Mbuti	0.15995	0.005309	30.128	13938
Guanzhuang	CGGL_BA1	Mbuti	0.24656	0.00263	93.737	483318		Guanzhuang_o	PUR_oAfrica.SG	Mbuti	0.152554	0.00482	31.649	14425
Guanzhuang	Mongolia_Khovd_EBA_o	Mbuti	0.24653	0.005161	47.77	34392		Guanzhuang_o	Amhara.DG	Mbuti	0.149253	0.005304	28.141	13906
Guanzhuang	KKSX_IA1	Mbuti	0.246504	0.002514	98.069	415303		Guanzhuang_o	Somali.DG	Mbuti	0.147375	0.005926	24.87	13434
Guanzhuang	Yadava.DG	Mbuti	0.246372	0.002422	101.72	532721		Guanzhuang_o	Mozabite_oSubSaharan.SDG	Mbuti	0.139673	0.00459	30.427	14676
Guanzhuang	Russia_Tagar.SG	Mbuti	0.246315	0.002432	101.265	549446		Guanzhuang_o	Rendille.DG	Mbuti	0.13347	0.004783	27.905	13847
Guanzhuang	Vanuatu_2300BP_all	Mbuti	0.246181	0.002909	84.641	293052		Guanzhuang_o	Iraqw.DG	Mbuti	0.126865	0.004614	27.495	13826
Guanzhuang	Kazakhstan_IA_Saka_dup.I3752.SG	Mbuti	0.24618	0.004096	60.101	70028		Guanzhuang_o	Hadza_2.DG	Mbuti	0.124606	0.005784	21.542	13486
Guanzhuang	VLR.SG	Mbuti	0.246044	0.002328	105.691	560743		Guanzhuang_o	Fulani.DG	Mbuti	0.124129	0.004807	25.824	13836
Guanzhuang	Ukraine_IA_WesternScythian_Cimmerians_o2_dup.MJ-32.SG	Mbuti	0.245846	0.004164	59.038	65382		Guanzhuang_o	Elmolo.DG	Mbuti	0.123358	0.004575	26.964	13856
Guanzhuang	Irula.DG	Mbuti	0.245833	0.002457	100.062	532115		Guanzhuang_o	Aari.DG	Mbuti	0.121761	0.004654	26.163	13760
Guanzhuang	TLKT_IA3	Mbuti	0.245752	0.003293	74.625	169612		Guanzhuang_o	ACB_o2.SG	Mbuti	0.114347	0.005399	21.178	13939
Guanzhuang	ZKT_IA	Mbuti	0.24571	0.002947	83.364	235186		Guanzhuang_o	Ogiek.DG	Mbuti	0.111959	0.004889	22.901	13718
Guanzhuang	Kazakhstan_Dali_EBA	Mbuti	0.24547	0.002967	82.737	283428		Guanzhuang_o	Masai.DG	Mbuti	0.111056	0.004658	23.841	13768
Guanzhuang	STU.SG	Mbuti	0.245333	0.00224	109.536	597081		Guanzhuang_o	ASW.SG	Mbuti	0.109732	0.003366	32.598	16265
Guanzhuang	Kazakhstan_LBA_Molaly	Mbuti	0.245078	0.002908	84.272	266992		Guanzhuang_o	Sandawe.DG	Mbuti	0.107476	0.005577	19.27	13392
Guanzhuang	JRTG_IA1	Mbuti	0.245039	0.002589	94.664	382062		Guanzhuang_o	Bulala.DG	Mbuti	0.107142	0.004492	23.85	13734
Guanzhuang	Punjabi.DG	Mbuti	0.244948	0.002355	103.992	540652		Guanzhuang_o	Sengwer.DG	Mbuti	0.106738	0.004723	22.597	13725
Guanzhuang	Relli_2.DG	Mbuti	0.244934	0.002646	92.551	520337		Guanzhuang_o	Kikuyu.DG	Mbuti	0.104924	0.004488	23.378	13757
Guanzhuang	Russia_HG_Tyumen	Mbuti	0.244912	0.00282	86.841	293584		Guanzhuang_o	Ethiopia_4500BP_published.SG	Mbuti	0.101043	0.006795	14.871	13666
Guanzhuang	Russia_Karasuk_dup.I3423.SG	Mbuti	0.244898	0.00425	57.623	60778		Guanzhuang_o	Mursi.DG	Mbuti	0.099854	0.004598	21.718	13678
Guanzhuang	ITU.SG	Mbuti	0.244894	0.002233	109.687	597472		Guanzhuang_o	ACB.SG	Mbuti	0.096525	0.003159	30.553	16370
Guanzhuang	SMTS_IA1	Mbuti	0.244894	0.002806	87.281	448191		Guanzhuang_o	Dinka.DG	Mbuti	0.089252	0.003953	22.577	14462
Guanzhuang	Tatar_Volga.SG	Mbuti	0.244676	0.002544	96.163	538563		Guanzhuang_o	Mada.DG	Mbuti	0.088528	0.004363	20.289	13696
Guanzhuang	Turkey_OttomanPeriod_Turkish_Caucasian_possible.SG	Mbuti	0.244582	0.003709	65.934	103765		Guanzhuang_o	LWK.SG	Mbuti	0.08521	0.003094	27.545	16077
Guanzhuang	Burusho.DG	Mbuti	0.24455	0.002469	99.041	534714		Guanzhuang_o	GWD.SG	Mbuti	0.084548	0.003158	26.773	16000
Guanzhuang	Russia_HG_Sosnoviy	Mbuti	0.244522	0.003093	79.045	189642		Guanzhuang_o	Lemande.DG	Mbuti	0.084251	0.004465	18.868	13677
Guanzhuang	Kazakhstan_Kangju_o2.SG	Mbuti	0.244374	0.00308	79.337	252590		Guanzhuang_o	Mandenka.SDG	Mbuti	0.084003	0.003369	24.936	15427
Guanzhuang	Kazakhstan_Nomad_IA_o.SG	Mbuti	0.244371	0.003253	75.118	130480		Guanzhuang_o	Esan.DG	Mbuti	0.083304	0.004389	18.981	13685
Guanzhuang	Kazakhstan_MLBA_Kairan_o	Mbuti	0.244297	0.002902	84.186	172454		Guanzhuang_o	Mandenka.DG	Mbuti	0.082857	0.003756	22.061	14519
Guanzhuang	STU_o1.SG	Mbuti	0.244031	0.002427	100.539	537165		Guanzhuang_o	Luhya.DG	Mbuti	0.082672	0.004233	19.531	13711
Guanzhuang	STU_o2.SG	Mbuti	0.243935	0.002494	97.808	537383		Guanzhuang_o	BantuKenya.SDG	Mbuti	0.082627	0.003596	22.98	14811
Guanzhuang	GIH.SG	Mbuti	0.243696	0.002247	108.475	598087		Guanzhuang_o	Luo.DG	Mbuti	0.082052	0.004328	18.957	13677
Guanzhuang	Russia_HG_Karelia.SG	Mbuti	0.243621	0.002856	85.296	452543		Guanzhuang_o	BantuKenya.DG	Mbuti	0.081487	0.004579	17.796	13688
Guanzhuang	JEZK_IA2	Mbuti	0.243598	0.002683	90.786	259451		Guanzhuang_o	Laka.DG	Mbuti	0.081137	0.004108	19.75	13680
Guanzhuang	Russia_EarlySarmatian.SG	Mbuti	0.243539	0.003794	64.192	78171		Guanzhuang_o	YRI.SG	Mbuti	0.080905	0.003128	25.863	15887
Guanzhuang	Kazakhstan_Kumsay_EBA	Mbuti	0.243434	0.002554	95.32	405309		Guanzhuang_o	GWD_oEuropean.SG	Mbuti	0.080872	0.006887	11.743	13667
Guanzhuang	ABST_IA2	Mbuti	0.243421	0.002811	86.607	281463		Guanzhuang_o	Gambian.DG	Mbuti	0.080619	0.004444	18.14	13705
Guanzhuang	Russia_Andronovo_o.SG	Mbuti	0.243391	0.003548	68.603	110600		Guanzhuang_o	Mende.DG	Mbuti	0.080506	0.004329	18.596	13693
Guanzhuang	ABST_IA_K	Mbuti	0.243349	0.002764	88.046	393829		Guanzhuang_o	Ngumba.DG	Mbuti	0.080321	0.004162	19.3	13665
Guanzhuang	JRTG_IA_K	Mbuti	0.243342	0.002722	89.4	238381		Guanzhuang_o	Yoruba.SDG	Mbuti	0.080232	0.003235	24.801	15572
Guanzhuang	HET_HE1	Mbuti	0.243311	0.002719	89.471	261981		Guanzhuang_o	ESN.SG	Mbuti	0.080017	0.003098	25.826	15844
Guanzhuang	WZ_IA3	Mbuti	0.243125	0.002803	86.724	464590		Guanzhuang_o	YRI_relative.SG	Mbuti	0.079847	0.006636	12.032	13503
Guanzhuang	Kazakhstan_Mereke_MBA	Mbuti	0.243007	0.002686	90.463	350279		Guanzhuang_o	BantuSA_Ovambo.SDG	Mbuti	0.079828	0.004937	16.168	13768
Guanzhuang	Tajik.SG	Mbuti	0.242933	0.00245	99.149	545941		Guanzhuang_o	MSL.SG	Mbuti	0.079096	0.003128	25.29	15797
Guanzhuang	GJT_IA	Mbuti	0.242681	0.002863	84.764	298912		Guanzhuang_o	Kaba.DG	Mbuti	0.078564	0.004253	18.472	13691
Guanzhuang	AYSG_IA2	Mbuti	0.24257	0.003221	75.307	160506		Guanzhuang_o	YRI_o.SG	Mbuti	0.078454	0.003899	20.124	14438
Guanzhuang	Pakistan_Aligrama_IA_published	Mbuti	0.242518	0.002483	97.659	398956		Guanzhuang_o	Kongo.DG	Mbuti	0.078113	0.005381	14.515	13340
Guanzhuang	TBLS_HE2	Mbuti	0.242518	0.004343	55.838	52805		Guanzhuang_o	South_Africa_400BP.SG	Mbuti	0.076042	0.004448	17.096	14040
Guanzhuang	Russia_LBA_1.SG	Mbuti	0.242469	0.005446	44.524	29572		Guanzhuang_o	Yoruba.DG	Mbuti	0.075998	0.003928	19.346	13923
Guanzhuang	PJL.SG	Mbuti	0.242456	0.002223	109.051	599210		Guanzhuang_o	Igbo.DG	Mbuti	0.07582	0.004314	17.574	13689
Guanzhuang	ZKT_IA_K	Mbuti	0.242394	0.003105	78.055	172503		Guanzhuang_o	Tikar_South.DG	Mbuti	0.075039	0.004009	18.719	13707
Guanzhuang	Mongolia_Arkhangai_EarlyMedieval	Mbuti	0.24238	0.002409	100.626	536344		Guanzhuang_o	BantuHerero.DG	Mbuti	0.072212	0.004431	16.297	13661
Guanzhuang	Denmark_Viking_1d.rel.VK215.SG	Mbuti	0.242334	0.007151	33.89	15204		Guanzhuang_o	BantuSA_Herero.SDG	Mbuti	0.072069	0.0043	16.76	14103
Guanzhuang	CGGL_BA_K	Mbuti	0.242286	0.005718	42.369	26313		Guanzhuang_o	BantuSA.SDG	Mbuti	0.069858	0.003391	20.599	14743
Guanzhuang	ZGLK_IA5	Mbuti	0.242211	0.003508	69.053	120073		Guanzhuang_o	BantuTswana.DG	Mbuti	0.068691	0.004275	16.066	13684
Guanzhuang	Russia_LBA_Priobrazhenka	Mbuti	0.24208	0.00357	67.809	118895		Guanzhuang_o	Cameroon_SMA.SG	Mbuti	0.058872	0.004953	11.885	13751
Guanzhuang	Russia_MLBA_Sintashta_o3	Mbuti	0.242022	0.002999	80.688	267527		Guanzhuang_o	Cameroon_SMA.DG.SG	Mbuti	0.056848	0.006264	9.075	13184
Guanzhuang	Russia_EarlySarmatian_SouthernUrals.SG	Mbuti	0.24189	0.002531	95.585	402956		Guanzhuang_o	Cameroon_SMA_published	Mbuti	0.056024	0.005142	10.896	12007
Guanzhuang	Mongolia_EBA_Chemurchek_2	Mbuti	0.241885	0.002663	90.83	372772		Guanzhuang_o	Cameroon_SMA.DG	Mbuti	0.055767	0.005023	11.103	13568
Guanzhuang	Russia_MiddleSarmatian_SouthernUrals.SG	Mbuti	0.241839	0.002887	83.756	228675		Guanzhuang_o	Bedzan.DG	Mbuti	0.053773	0.004261	12.62	13548
Guanzhuang	Mongolia_Selenge_XiongnuMedieval_o2	Mbuti	0.241586	0.002741	88.135	391612		Guanzhuang_o	Baka.DG	Mbuti	0.051727	0.004115	12.57	13558
Guanzhuang	WZ_IA2	Mbuti	0.241464	0.00318	75.935	162260		Guanzhuang_o	Biaka.SDG	Mbuti	0.047414	0.00263	18.032	15258
Guanzhuang	HET_HE2	Mbuti	0.241439	0.005232	46.144	38769		Guanzhuang_o	Bakola.DG	Mbuti	0.046607	0.003862	12.069	13587
Guanzhuang	SSG_BA1	Mbuti	0.241425	0.002733	88.34	299221		Guanzhuang_o	Khomani_San.DG	Mbuti	0.045181	0.004376	10.324	13646
Guanzhuang	Mongolia_EBA_Chemurchek_2_dup.I12957	Mbuti	0.241366	0.002805	86.061	350357		Guanzhuang_o	Ju_hoan_North.SDG	Mbuti	0.043225	0.003574	12.093	14667
Guanzhuang	Indian.SG	Mbuti	0.24134	0.002657	90.823	527436		Guanzhuang_o	Biaka.DG	Mbuti	0.042402	0.003892	10.896	13553
Guanzhuang	TGB_BA_K	Mbuti	0.241168	0.002546	94.714	396039		Guanzhuang_o	South_Africa_1900BP.SG	Mbuti	0.033912	0.005002	6.78	13793
Guanzhuang	Spain_C_oSteppe_published	Mbuti	0.241133	0.007993	30.17	13158		Guanzhuang_o	Gorilla.REF	Mbuti	0.03341	0.006208	5.381	12611
Guanzhuang	G218_BA1	Mbuti	0.24112	0.003395	71.025	128606		Guanzhuang_o	Ancestor.REF	Mbuti	0.031993	0.006106	5.239	13521
Guanzhuang	Brahmin.DG	Mbuti	0.241037	0.002347	102.711	533844		Guanzhuang_o	DenisovaNeanderthalMix.SG	Mbuti	0.030454	0.006628	4.595	11744
Guanzhuang	Moldova_Glinoe_Scythian_o1.SG	Mbuti	0.24103	0.007242	33.281	15995		Guanzhuang_o	Denisova.DG	Mbuti	0.025443	0.006175	4.121	12400
Guanzhuang	Pakistan_H_Aligrama	Mbuti	0.240903	0.002352	102.443	494920		Guanzhuang_o	Altai_Neanderthal_published.DG	Mbuti	0.023268	0.005833	3.989	13772
Guanzhuang	Russia_LateSarmatian.SG	Mbuti	0.240882	0.002506	96.122	520812		Guanzhuang_o	Altai_Neanderthal.DG	Mbuti	0.021909	0.006069	3.61	12441
Guanzhuang	SHXB_IA	Mbuti	0.240838	0.002938	81.983	295685		Guanzhuang_o	Chagyrskaya_Neanderthal.SG	Mbuti	0.021286	0.006103	3.488	12447
Guanzhuang	TGB_BA1	Mbuti	0.240829	0.002727	88.299	452377		Guanzhuang_o	Vindija_Neanderthal.DG	Mbuti	0.018576	0.006092	3.049	12445
Guanzhuang	Russia_AfontovaGora2.SG	Mbuti	0.240802	0.005607	42.949	27635		Guanzhuang_o	Mbuti.DG	Mbuti	-0.025528	0.001476	-17.295	12972
Guanzhuang	DML_IA_K	Mbuti	0.240791	0.003569	67.464	105106
Guanzhuang	TLKT_IA2	Mbuti	0.24079	0.006958	34.607	17820
Guanzhuang	GIH_o.SG	Mbuti	0.240784	0.002669	90.23	518061
Guanzhuang	India_RoopkundA	Mbuti	0.240775	0.002286	105.348	452320
Guanzhuang	Mongolia_Arkhangai_XiongnuEarlyMedieval_2	Mbuti	0.240772	0.00267	90.164	356583
Guanzhuang	Russia_HG_Karelia	Mbuti	0.240654	0.00279	86.253	443520
Guanzhuang	Pakistan_Barikot_IA_o	Mbuti	0.240636	0.0035	68.761	113013
Guanzhuang	WTL_IA_K	Mbuti	0.240622	0.004985	48.271	38787
Guanzhuang	PUN.SG	Mbuti	0.2406	0.002575	93.446	525129
Guanzhuang	Kazakhstan_Maitan_MLBA_Alakul_o2	Mbuti	0.240485	0.002839	84.713	332596
Guanzhuang	Punjabi_o.DG	Mbuti	0.24043	0.002647	90.826	520500
Guanzhuang	Ukraine_EBA_Yamnaya_o.SG	Mbuti	0.24043	0.004028	59.695	71214
Guanzhuang	AXL_IA	Mbuti	0.240392	0.002987	80.482	242801
Guanzhuang	Pakistan_H_SaiduSharif	Mbuti	0.240388	0.002291	104.929	529336
Guanzhuang	Kazakhstan_MLBA_Zevakinskiy	Mbuti	0.240344	0.003036	79.171	258826
Guanzhuang	Pakistan_Medieval_Parwak	Mbuti	0.240312	0.005585	43.025	28605
Guanzhuang	SPL_HE4	Mbuti	0.240278	0.007765	30.944	13768
Guanzhuang	Pakistan_Loebanr_IA_mother.I10001	Mbuti	0.240273	0.002758	87.116	293429
Guanzhuang	Russia_Sarmatian.SG	Mbuti	0.240273	0.002468	97.353	476234
Guanzhuang	FIN.SG	Mbuti	0.2402	0.002313	103.847	597735
Guanzhuang	JEZK_IA_K	Mbuti	0.240125	0.002692	89.191	239890
Guanzhuang	Russia_IA_Scythian_questionable	Mbuti	0.240003	0.002885	83.197	396100
Guanzhuang	Spain_IA_Tartessian_published	Mbuti	0.239902	0.005886	40.761	27055
Guanzhuang	Russia_Vologda_Veretye_Mesolithic.SG	Mbuti	0.239885	0.00402	59.671	77997
Guanzhuang	Kazakhstan_IA_Chanchar_published	Mbuti	0.239856	0.002928	81.916	243648
Guanzhuang	Russia_Mezhovskaya.SG	Mbuti	0.239766	0.002649	90.52	459785
Guanzhuang	Russia_Yana_UP.SG	Mbuti	0.239754	0.002645	90.638	537277
Guanzhuang	KKSX_IA4	Mbuti	0.239733	0.006982	34.334	16204
Guanzhuang	HET_HE3	Mbuti	0.239721	0.003065	78.215	207292
Guanzhuang	Sindhi_Pakistan.DG	Mbuti	0.23972	0.002446	97.994	534327
Guanzhuang	USA_PA_Colonist.SG	Mbuti	0.239706	0.003861	62.082	81269
Guanzhuang	TAOSI	Mbuti	0.239609	0.003866	61.985	73742
Guanzhuang	Russia_MA1_HG.SG	Mbuti	0.239598	0.003019	79.353	357559
Guanzhuang	Ukraine_N_father.or.son.I5883_published	Mbuti	0.23927	0.00808	29.613	13893
Guanzhuang	Kazakhstan_Kangju.SG	Mbuti	0.239238	0.002826	84.645	209924
Guanzhuang	Ukraine_LateSrubnaya.SG	Mbuti	0.239217	0.004239	56.432	56766
Guanzhuang	Russia_Steppe_Maikop	Mbuti	0.239197	0.002522	94.828	393649
Guanzhuang	Russia_Srubnaya_o1	Mbuti	0.239091	0.003096	77.232	208497
Guanzhuang	Russia_Arkhangelsk_Veretye_Mesolithic.SG	Mbuti	0.239087	0.00287	83.293	512524
Guanzhuang	Spain_SE_Iberia_CA_published	Mbuti	0.239034	0.007192	33.238	17495
Guanzhuang	JEZK_IA1	Mbuti	0.238946	0.002499	95.618	285080
Guanzhuang	LSH_IA4	Mbuti	0.238933	0.00769	31.073	15648
Guanzhuang	SSG_LBA	Mbuti	0.238926	0.00277	86.241	458861
Guanzhuang	Turkey_Hellenistic_EastMediterranean_possible.SG	Mbuti	0.238907	0.002928	81.588	235358
Guanzhuang	Russia_IA_EarlySarmatian	Mbuti	0.238833	0.002777	86.003	310427
Guanzhuang	Kazakhstan_LIA_Georgievsky_published	Mbuti	0.238817	0.002867	83.292	248719
Guanzhuang	Russian.DG	Mbuti	0.238772	0.002448	97.519	536566
Guanzhuang	Turkmenistan_Gonur_BA_1_o1	Mbuti	0.238758	0.003879	61.552	76673
Guanzhuang	Tajik_o.SG	Mbuti	0.238647	0.002607	91.541	528008
Guanzhuang	Kazakhstan_His.SG	Mbuti	0.238572	0.004287	55.649	49426
Guanzhuang	Kazakhstan_Kangju_o1.SG	Mbuti	0.238558	0.002674	89.217	340285
Guanzhuang	Ukraine_IA_WesternScythian.SG	Mbuti	0.238508	0.00266	89.651	335244
Guanzhuang	Pakistan_Aligrama_IA	Mbuti	0.238506	0.002822	84.529	268316
Guanzhuang	AYTH_BA	Mbuti	0.238382	0.002727	87.408	247833
Guanzhuang	Russia_Srubnaya_1d.rel.I0354	Mbuti	0.238355	0.004769	49.979	41635
Guanzhuang	Pakistan_Udegram_IA_o	Mbuti	0.238327	0.00731	32.601	15563
Guanzhuang	Kazakhstan_Saka_EIA	Mbuti	0.238286	0.005566	42.81	29425
Guanzhuang	Ukraine_N_1d.rel.I5881_published	Mbuti	0.238257	0.007334	32.487	16059
Guanzhuang	BLT_BA	Mbuti	0.238255	0.002846	83.713	291473
Guanzhuang	SPL_HE1	Mbuti	0.238249	0.004043	58.928	63372
Guanzhuang	Russia_Sidelkino_HG.SG	Mbuti	0.238195	0.002775	85.845	454489
Guanzhuang	Norway_Mesolithic.SG	Mbuti	0.238184	0.002734	87.108	520314
Guanzhuang	Pathan.DG	Mbuti	0.23817	0.002391	99.623	534943
Guanzhuang	Russia_MLBA_Sintashta_o1	Mbuti	0.238133	0.002783	85.555	259406
Guanzhuang	Latvia_MN_o1.SG	Mbuti	0.238003	0.003827	62.183	77839
Guanzhuang	JMCY_HE1	Mbuti	0.238	0.003921	60.705	71395
Guanzhuang	Pakistan_H_SaiduSharif_o2	Mbuti	0.237984	0.002993	79.525	230428
Guanzhuang	G218_BA2	Mbuti	0.237971	0.00352	67.611	106445
Guanzhuang	Norway_N_HG.SG	Mbuti	0.237942	0.002925	81.335	404763
Guanzhuang	Russia_Yaroslavl_Fatyanovo_BA_dup.I1490.SG	Mbuti	0.237926	0.004069	58.466	72886
Guanzhuang	Russia_Potapovka	Mbuti	0.237885	0.004345	54.746	58785
Guanzhuang	Sweden_Viking_1d.rel.VK527.SG	Mbuti	0.237851	0.002777	85.663	341688
Guanzhuang	Russia_Potapovka_o1	Mbuti	0.237764	0.002806	84.743	340971
Guanzhuang	Turkmenistan_Gonur_BA_2_published	Mbuti	0.237738	0.003876	61.343	77896
Guanzhuang	Mongolia_Arkhangai_XiongnuEarlyMedieval_1_sister.BUR003	Mbuti	0.237736	0.003541	67.134	106401
Guanzhuang	Denmark_Viking_o2.SG	Mbuti	0.237641	0.002929	81.142	226696
Guanzhuang	Turkmenistan_Gonur_BA_2	Mbuti	0.237519	0.00313	75.873	114628
Guanzhuang	G218_IA_K	Mbuti	0.237488	0.009359	25.375	9282
Guanzhuang	Latvia_MN_Comb_Ware.SG	Mbuti	0.237301	0.002861	82.952	361953
Guanzhuang	Kalash.DG	Mbuti	0.237257	0.002393	99.149	533040
Guanzhuang	Pakistan_Loebanr_IA_son.I6292.son.I10000	Mbuti	0.237198	0.002835	83.667	287969
Guanzhuang	Russia_MBA_Poltavka_contam	Mbuti	0.237182	0.008923	26.581	10526
Guanzhuang	KKSX_IA2	Mbuti	0.237144	0.00286	82.905	277837
Guanzhuang	Pakistan_H_Butkara	Mbuti	0.237103	0.00241	98.371	360628
Guanzhuang	Poland_Medieval_1.SG	Mbuti	0.237075	0.00596	39.779	23324
Guanzhuang	Pakistan_H_Butkara_mother.I6549	Mbuti	0.236993	0.003213	73.768	161616
Guanzhuang	JMCY_HE_K	Mbuti	0.236959	0.006933	34.176	18540
Guanzhuang	Denmark_Viking_lc.SG	Mbuti	0.236935	0.00625	37.912	19354
Guanzhuang	AYSG_IA_K	Mbuti	0.236929	0.004655	50.897	48956
Guanzhuang	Norway_LN_BA.SG	Mbuti	0.236902	0.002773	85.44	399891
Guanzhuang	Wales_N_all.SG	Mbuti	0.236846	0.004906	48.275	38773
Guanzhuang	KKSX_IA_K	Mbuti	0.23683	0.003139	75.443	154655
Guanzhuang	Kazakhstan_CentralSaka_o2.SG	Mbuti	0.236827	0.002911	81.365	233189
Guanzhuang	Pakistan_H_Barikot	Mbuti	0.236823	0.002428	97.527	433677
Guanzhuang	Denmark_Djursland_SingleGraveCulture_dup.RISE1281.SG	Mbuti	0.236759	0.008552	27.685	9243
Guanzhuang	Russia_Srubnaya_Alakul_brother.kzb008.SG	Mbuti	0.236753	0.00291	81.37	313707
Guanzhuang	Kazakhstan_MLBA_Dali	Mbuti	0.236714	0.00266	88.985	397929
Guanzhuang	Mongolia_Khentii_XiongnuLatEMedieval	Mbuti	0.236709	0.002791	84.816	262928
Guanzhuang	Russia_Samara_EBA_Yamnaya_published	Mbuti	0.236688	0.002928	80.844	237882
Guanzhuang	Latvia_MN_o3	Mbuti	0.236657	0.002645	89.481	325065
Guanzhuang	Uzbekistan_Bustan_BA_o2	Mbuti	0.236584	0.002935	80.615	283781
Guanzhuang	Kazakhstan_Kangju_o3.SG	Mbuti	0.236575	0.002857	82.796	418967
Guanzhuang	Russia_HG_Samara	Mbuti	0.236569	0.003235	73.132	192556
Guanzhuang	Russia_Ivanovo_Fatyanovo_BA_lc.SG	Mbuti	0.236492	0.007338	32.228	13739
Guanzhuang	Latvia_MN_o2	Mbuti	0.236428	0.003032	77.981	260287
Guanzhuang	Turkey_TepecikCiftlik_N_o.SG	Mbuti	0.236397	0.009831	24.046	7702
Guanzhuang	Russia_EBA_o1.SG	Mbuti	0.236378	0.003541	66.749	101096
Guanzhuang	Hungary_IA_Prescythian.SG	Mbuti	0.236362	0.002809	84.144	369024
Guanzhuang	Sweden_Mesolithic.SG	Mbuti	0.236353	0.002617	90.3	537801
Guanzhuang	Iran_ShahrISokhta_BA2_published	Mbuti	0.236335	0.002541	93.013	324073
Guanzhuang	Pakistan_Udegram_IA	Mbuti	0.236321	0.002258	104.672	507189
Guanzhuang	Russia_MLBA_Sintashta_o2_brother.I1057_brother.I1058	Mbuti	0.236313	0.003279	72.067	149392
Guanzhuang	Pakistan_Gogdara_IA	Mbuti	0.23626	0.002508	94.184	345222
Guanzhuang	Russia_MLBA_Priobrazhenka_contam	Mbuti	0.236198	0.00861	27.433	11072
Guanzhuang	Tajik.DG	Mbuti	0.236181	0.002445	96.597	535067
Guanzhuang	Poland_Southeast_CordedWare_MC.SG	Mbuti	0.236173	0.004676	50.503	42305
Guanzhuang	Sweden_Motala_HG	Mbuti	0.236128	0.002574	91.743	470048
Guanzhuang	Portugal_LBA	Mbuti	0.236092	0.006608	35.729	18460
Guanzhuang	CSC_IA2	Mbuti	0.236065	0.002861	82.515	297321
Guanzhuang	Russia_Samara_EBA_Yamnaya_published2	Mbuti	0.236004	0.002837	83.177	477765
Guanzhuang	Estonia_IA.SG	Mbuti	0.235977	0.002526	93.419	404845
Guanzhuang	Russia_Khvalynsk_Eneolithic	Mbuti	0.235972	0.002668	88.46	326101
Guanzhuang	Estonia_Medieval.SG	Mbuti	0.235964	0.002583	91.356	378338
Guanzhuang	Poland_CWC.SG	Mbuti	0.235813	0.002786	84.656	357440
Guanzhuang	FIN_o.SG	Mbuti	0.235766	0.002532	93.114	539609
Guanzhuang	Pakistan_Loebanr_IA	Mbuti	0.235658	0.002239	105.246	540246
Guanzhuang	Pakistan_Loebanr_IA_brother.I8998	Mbuti	0.235658	0.002846	82.809	314036
Guanzhuang	Spain_HG	Mbuti	0.23561	0.002895	81.398	423786
Guanzhuang	India_Harappan	Mbuti	0.235551	0.009545	24.679	9029
Guanzhuang	Kazakhstan_Maitan_MLBA_Alakul_o1	Mbuti	0.235516	0.002804	83.978	323018
Guanzhuang	Sweden_Viking_o1.SG	Mbuti	0.235506	0.002614	90.079	398413
Guanzhuang	Russia_MLBA_Sintashta_o2	Mbuti	0.235494	0.002617	89.994	391397
Guanzhuang	Latvia_HG_dup.I4628.SG	Mbuti	0.23549	0.002854	82.518	295275
Guanzhuang	TLKT_IA1	Mbuti	0.235488	0.002723	86.485	335475
Guanzhuang	Luxembourg_Loschbour.DG	Mbuti	0.23545	0.002752	85.543	489401
Guanzhuang	Sweden_Motala_HG.SG	Mbuti	0.235436	0.002861	82.288	471962
Guanzhuang	Sweden_PWC.SG	Mbuti	0.235405	0.002677	87.925	504468
Guanzhuang	Russia_Srubnaya_Alakul.SG	Mbuti	0.235169	0.002341	100.454	562387
Guanzhuang	Russia_MBA_Poltavka_published	Mbuti	0.235166	0.002603	90.352	468269
Guanzhuang	SMTS_IA2	Mbuti	0.235149	0.003405	69.058	153341
Guanzhuang	Ukraine_Cimmerians_o1.SG	Mbuti	0.235034	0.003604	65.221	88962
Guanzhuang	Hungary_IA_Scythian	Mbuti	0.235001	0.003496	67.222	102832
Guanzhuang	Pakistan_Loebanr_IA_published	Mbuti	0.234992	0.002497	94.115	367768
Guanzhuang	Pakistan_Loebanr_IA_1d.rel.I12136	Mbuti	0.23499	0.002829	83.055	300528
Guanzhuang	Spain_HG_brother.I0585	Mbuti	0.234989	0.00277	84.839	437656
Guanzhuang	Pakistan_Medieval_Singoor	Mbuti	0.23493	0.003082	76.228	187086
Guanzhuang	Russia_Viking_o.SG	Mbuti	0.234895	0.002567	91.497	475921
Guanzhuang	Russia_Afanasievo.DG	Mbuti	0.234893	0.002417	97.197	545163
Guanzhuang	Russia_Steppe_Lola	Mbuti	0.234851	0.002802	83.827	297747
Guanzhuang	Sweden_Gotland_Vasterbjers_PittedWare_BattleAxe.SG	Mbuti	0.234826	0.002425	96.848	554202
Guanzhuang	Sweden_Gotland_Ajvide_PittedWare_BattleAxe.SG	Mbuti	0.234782	0.002792	84.092	440450
Guanzhuang	Russia_Afanasievo_sister.I3387_mother.I6711.SG	Mbuti	0.234778	0.002746	85.506	464251
Guanzhuang	Sweden_Gotland_Hemmor_PittedWare_BattleAxe.SG	Mbuti	0.234765	0.002701	86.917	504130
Guanzhuang	Poland_Viking_1d.rel.VK157.SG	Mbuti	0.234762	0.003817	61.508	75928
Guanzhuang	Pakistan_Katelai_IA	Mbuti	0.234756	0.002253	104.215	507904
Guanzhuang	Estonia_MN_CCC_1	Mbuti	0.234746	0.00432	54.342	53371
Guanzhuang	JEZK_IA3	Mbuti	0.234745	0.003133	74.924	186841
Guanzhuang	Pakistan_Udegram_IA_father.or.son.I1799_1d.rel.I1992	Mbuti	0.234672	0.002621	89.535	316567
Guanzhuang	Pakistan_Barikot_Medieval_2	Mbuti	0.234659	0.002593	90.487	358865
Guanzhuang	CGGL_BA2	Mbuti	0.234639	0.002658	88.269	341053
Guanzhuang	Russia_MBA_Poltavka	Mbuti	0.234632	0.002546	92.142	391091
Guanzhuang	HBH_BA_K	Mbuti	0.234573	0.004254	55.143	55722
Guanzhuang	England_IA_o.SG	Mbuti	0.234562	0.003151	74.442	219502
Guanzhuang	Russia_AfontovaGora3	Mbuti	0.234553	0.003762	62.342	87675
Guanzhuang	Russia_EHG	Mbuti	0.23455	0.003195	73.41	183857
Guanzhuang	Poland_BKG_o2.SG	Mbuti	0.234529	0.002858	82.062	452054
Guanzhuang	Russia_Srubnaya_Scythian_Sarmatian_possible	Mbuti	0.234509	0.007897	29.695	11339
Guanzhuang	JRTG_IA2	Mbuti	0.234494	0.002881	81.385	286554
Guanzhuang	Lithuania_EMN_Narva	Mbuti	0.234489	0.00255	91.964	496642
Guanzhuang	Switzerland_Bichon.SG	Mbuti	0.234428	0.002838	82.613	527180
Guanzhuang	Ukraine_IA_WesternScythian_o1.SG	Mbuti	0.234416	0.00314	74.659	138141
Guanzhuang	Russia_Afanasievo	Mbuti	0.234403	0.002301	101.886	544819
Guanzhuang	Sweden_Gotland_Hemmor_PittedWare_BattleAxe_minus.SG	Mbuti	0.2344	0.00272	86.173	498910
Guanzhuang	Serbia_IronGates_Mesolithic_brother.I4880	Mbuti	0.234393	0.002846	82.362	338416
Guanzhuang	Mongolia_Arkhangai_XiongnuEarlyMedieval_1	Mbuti	0.234387	0.002849	82.272	384595
Guanzhuang	Lithuania_Mesolithic	Mbuti	0.234371	0.002892	81.039	260574
Guanzhuang	Serbia_IronGates_N_published	Mbuti	0.234358	0.007288	32.155	15657
Guanzhuang	Sweden_Gotland_Vasterbjers_PittedWare_BattleAxe_minus.SG	Mbuti	0.234299	0.002429	96.457	559324
Guanzhuang	Russia_Afanasievo.SG	Mbuti	0.234295	0.002401	97.597	544510
Guanzhuang	Russia_Yaroslavl_VolosovoLyalovo_N.SG	Mbuti	0.23429	0.004457	52.569	51028
Guanzhuang	Sweden_Viking_o2.SG	Mbuti	0.234276	0.002631	89.057	524575
Guanzhuang	Turkmenistan_Gonur_BA_1_o3	Mbuti	0.234268	0.00758	30.905	15206
Guanzhuang	TGB_BA2	Mbuti	0.234252	0.002771	84.545	268196
Guanzhuang	Portugal_Geometric_Mesolithic	Mbuti	0.234243	0.004238	55.273	62596
Guanzhuang	Turkey_Alalakh_MLBA_contam	Mbuti	0.234241	0.005006	46.795	36087
Guanzhuang	Bulgaria_MLBA	Mbuti	0.234228	0.002763	84.763	304158
Guanzhuang	KKSX_LBA	Mbuti	0.234159	0.002715	86.249	396664
Guanzhuang	Russia_MBA_Poltavka_o2	Mbuti	0.234114	0.002764	84.708	288879
Guanzhuang	Spain_HG_published_contam	Mbuti	0.234108	0.003138	74.616	176155
Guanzhuang	England_IA.SG	Mbuti	0.2341	0.002618	89.417	530894
Guanzhuang	Estonian.DG	Mbuti	0.23405	0.002433	96.196	536856
Guanzhuang	Adygei.DG	Mbuti	0.234007	0.00247	94.736	536057
Guanzhuang	Hungary_BA.SG	Mbuti	0.233977	0.0028	83.555	529639
Guanzhuang	CSC_IA_K	Mbuti	0.233972	0.00412	56.793	58710
Guanzhuang	Ireland_EBA.SG	Mbuti	0.233964	0.00246	95.11	543719
Guanzhuang	Spain_Hellenistic_oLocal	Mbuti	0.233931	0.002748	85.139	309344
Guanzhuang	Denmark_IA.SG	Mbuti	0.233924	0.002416	96.836	541631
Guanzhuang	Portugal_MBA	Mbuti	0.233907	0.00744	31.44	13817
Guanzhuang	Romania_IronGates_Mesolithic.SG	Mbuti	0.233892	0.002473	94.578	535072
Guanzhuang	Hungary_LBA_Halva	Mbuti	0.233879	0.002983	78.398	209410
Guanzhuang	Ukraine_MBA	Mbuti	0.233832	0.002822	82.87	271078
Guanzhuang	IsleOfMan_Viking.SG	Mbuti	0.233815	0.002703	86.493	365716
Guanzhuang	Latvia_HG_dup.I4632.SG	Mbuti	0.233812	0.00285	82.052	356111
Guanzhuang	Ukraine_Mesolithic_dup.I1819.SG	Mbuti	0.233806	0.003793	61.646	88572
Guanzhuang	Sweden_IA_2.SG	Mbuti	0.233765	0.002716	86.062	528992
Guanzhuang	Estonia_MN_CCC_2	Mbuti	0.23375	0.004758	49.126	46683
Guanzhuang	Pakistan_Loebanr_IA_mother.I6555_published	Mbuti	0.233744	0.002828	82.65	221466
Guanzhuang	Pakistan_Medieval_Udegram_Ghaznavid	Mbuti	0.233703	0.0031	75.392	201838
Guanzhuang	Russia_SaltovoMayaki.SG	Mbuti	0.233686	0.004611	50.682	38118
Guanzhuang	Spain_HG.SG	Mbuti	0.233654	0.002579	90.604	459766
Guanzhuang	Russia_Viking_father.or.son.VK160.SG	Mbuti	0.233641	0.009058	25.795	9643
Guanzhuang	Italy_Mesolithic.SG	Mbuti	0.233594	0.002578	90.607	536815
Guanzhuang	Estonia_N_CombCeramic.SG	Mbuti	0.233509	0.003924	59.503	61897
Guanzhuang	Russia_Samara_EBA_Yamnaya	Mbuti	0.233509	0.002345	99.576	508831
Guanzhuang	Russia_MLBA_Sintashta_o2_brother.I1057_brother.I1056	Mbuti	0.233473	0.002951	79.104	206956
Guanzhuang	Italy_LA_oCentralEuropean_o3CentralEuropean.SG	Mbuti	0.233464	0.002753	84.818	466639
Guanzhuang	Croatia_Mesolithic_HG	Mbuti	0.233454	0.003408	68.509	146449
Guanzhuang	Croatia_C_Lasinja_1d.rel.I10293_contam	Mbuti	0.233446	0.007934	29.423	11353
Guanzhuang	HET_HE_L	Mbuti	0.233433	0.006317	36.951	23088
Guanzhuang	Latvia_HG.SG	Mbuti	0.233427	0.00274	85.196	512998
Guanzhuang	Serbia_IronGates_Mesolithic	Mbuti	0.233423	0.002425	96.243	558942
Guanzhuang	Norway_Viking.SG	Mbuti	0.233393	0.002315	100.816	587413
Guanzhuang	CLM.SG	Mbuti	0.233383	0.002213	105.48	609812
Guanzhuang	England_IA_ERoman.SG	Mbuti	0.233356	0.002841	82.143	292239
Guanzhuang	Spain_UP_Azilian	Mbuti	0.233351	0.003565	65.458	121558
Guanzhuang	Hungary_EBA_Mako_published.SG	Mbuti	0.23335	0.002786	83.767	274643
Guanzhuang	CEU.SG	Mbuti	0.233335	0.002293	101.78	598954
Guanzhuang	Kazakhstan_GoldenHordeEuro.SG	Mbuti	0.233329	0.002813	82.94	309905
Guanzhuang	Ukraine_Viking.SG	Mbuti	0.233319	0.00278	83.933	407677
Guanzhuang	Ukraine_N_1d.rel.I5870	Mbuti	0.233313	0.00631	36.976	22423
Guanzhuang	Pakistan_Katelai_IA_published	Mbuti	0.233265	0.002448	95.277	353683
Guanzhuang	Pakistan_Butkara_IA	Mbuti	0.233257	0.002446	95.343	371184
Guanzhuang	Scotland_Viking.SG	Mbuti	0.233255	0.002375	98.23	532754
Guanzhuang	Pakistan_Udegram_IA_1d.rel.I6900	Mbuti	0.233244	0.003037	76.793	220640
Guanzhuang	Sweden_Mesolithic_o.SG	Mbuti	0.23324	0.004104	56.828	55604
Guanzhuang	Kazakhstan_MLBA_Alakul_Satan	Mbuti	0.233186	0.002802	83.212	345636
Guanzhuang	GBR.SG	Mbuti	0.233169	0.002291	101.757	597989
Guanzhuang	Russia_Popovo_HG	Mbuti	0.233145	0.006726	34.665	18733
Guanzhuang	Icelandic.DG	Mbuti	0.233124	0.002436	95.684	536943
Guanzhuang	Germany_EBA_Unetice	Mbuti	0.233114	0.002412	96.642	474080
Guanzhuang	Sweden_PWC_o.SG	Mbuti	0.233098	0.005681	41.034	23805
Guanzhuang	Ukraine_Viking_1d.rel.VK539.SG	Mbuti	0.233057	0.002809	82.96	306731
Guanzhuang	Lithuania_LN	Mbuti	0.233047	0.002563	90.945	525584
Guanzhuang	Chechen.DG	Mbuti	0.233038	0.002598	89.701	521894
Guanzhuang	Kazakhstan_Andronovo.SG	Mbuti	0.232989	0.003094	75.297	177091
Guanzhuang	Kazakhstan_MLBA_OyDzhaylau_o	Mbuti	0.232989	0.004304	54.137	58186
Guanzhuang	Germany_CordedWare	Mbuti	0.232958	0.002377	98.014	518519
Guanzhuang	Norway_IA.SG	Mbuti	0.232944	0.002462	94.613	526188
Guanzhuang	Norway_Medieval.SG	Mbuti	0.232925	0.002647	88.003	518891
Guanzhuang	Slovakia_Poprad.SG	Mbuti	0.232918	0.003066	75.956	220764
Guanzhuang	Kazakhstan_Mereke_MBA_o2	Mbuti	0.23291	0.002715	85.8	299278
Guanzhuang	Ireland_Mesolithic.SG	Mbuti	0.232901	0.002639	88.254	534641
Guanzhuang	Lithuania_Late_Antiquity.SG	Mbuti	0.232893	0.004307	54.079	55861
Guanzhuang	Ukraine_Medieval.SG	Mbuti	0.232879	0.002742	84.934	481369
Guanzhuang	Romania_IronGates_Mesolithic_published_dup.I4654	Mbuti	0.232868	0.002907	80.117	305631
Guanzhuang	Romania_C_oHG.SG	Mbuti	0.232867	0.00276	84.37	512946
Guanzhuang	Sweden_BAC.SG	Mbuti	0.232851	0.002471	94.242	507015
Guanzhuang	Kazakhstan_LBA_o3	Mbuti	0.232848	0.003221	72.301	167018
Guanzhuang	Moldova_Glinoe_Scythian.SG	Mbuti	0.232846	0.002391	97.378	515903
Guanzhuang	Lithuania_BA	Mbuti	0.232828	0.002895	80.426	212396
Guanzhuang	Russia_Tver_Fatyanovo_BA.SG	Mbuti	0.232787	0.002826	82.372	345388
Guanzhuang	Pakistan_Arkotkila_IA	Mbuti	0.232775	0.003981	58.478	78625
Guanzhuang	Serbia_IronGates_Mesolithic_published	Mbuti	0.232763	0.002645	88.006	408979
Guanzhuang	Serbia_Mokrin_EBA_Maros_1d.rel.MOK28A.SG	Mbuti	0.232755	0.002824	82.421	315018
Guanzhuang	Orcadian.DG	Mbuti	0.232721	0.00247	94.207	536916
Guanzhuang	Russia_Alan.SG	Mbuti	0.232705	0.00241	96.555	541191
Guanzhuang	Russia_Afanasievo_sister.I3950	Mbuti	0.232688	0.002782	83.639	269059
Guanzhuang	Russia_Potapovka_o2	Mbuti	0.232657	0.003033	76.702	237090
Guanzhuang	Estonia_BA.SG	Mbuti	0.232656	0.002385	97.532	491038
Guanzhuang	Ireland_Viking.SG	Mbuti	0.232623	0.002541	91.565	534918
Guanzhuang	Romania_IronGates_Mesolithic	Mbuti	0.232618	0.00252	92.326	469943
Guanzhuang	Russia_Sunghir_Medieval.SG	Mbuti	0.232618	0.002667	87.227	521929
Guanzhuang	Pakistan_Butkara_I_father.or.son.I12968_published	Mbuti	0.232597	0.003241	71.763	133390
Guanzhuang	Russia_Srubnaya	Mbuti	0.232549	0.002314	100.5	535997
Guanzhuang	Russia_MLBA_Sintashta	Mbuti	0.232547	0.002258	102.982	551770
Guanzhuang	SPL_HE3	Mbuti	0.232504	0.00291	79.905	248161
Guanzhuang	Latvia_HG	Mbuti	0.232501	0.002462	94.435	492621
Guanzhuang	Denmark_Viking.SG	Mbuti	0.232496	0.002294	101.335	599052
Guanzhuang	Poland_CWC_1.SG	Mbuti	0.232468	0.002573	90.353	531703
Guanzhuang	Russia_MLBA_Sintashta_contam	Mbuti	0.232456	0.003224	72.094	138417
Guanzhuang	Kazakhstan_MLBA_Karagash_father.or.son.I4262	Mbuti	0.232416	0.002886	80.538	244745
Guanzhuang	Sweden_HG.SG	Mbuti	0.232414	0.004612	50.388	43061
Guanzhuang	Kazakhstan_MLBA_Sintashta_o.SG	Mbuti	0.232403	0.006451	36.028	18538
Guanzhuang	Kazakhstan_Birlik_EIA.SG	Mbuti	0.2324	0.007974	29.146	11577
Guanzhuang	Turkish.DG	Mbuti	0.232387	0.002477	93.824	535528
Guanzhuang	Latvia_MN	Mbuti	0.232376	0.002685	86.543	316659
Guanzhuang	Norway_Viking_o2.SG	Mbuti	0.232366	0.002873	80.878	324784
Guanzhuang	Ukraine_N	Mbuti	0.232358	0.00244	95.244	452856
Guanzhuang	Russia_Sunghir1.SG	Mbuti	0.232347	0.002893	80.319	366667
Guanzhuang	Switzerland_EBA_2_brother.MX188	Mbuti	0.232307	0.003023	76.852	169623
Guanzhuang	French.DG	Mbuti	0.232306	0.002409	96.434	545164
Guanzhuang	Sweden_FBC.SG	Mbuti	0.232283	0.002777	83.653	279171
Guanzhuang	Switzerland_EBA_2_1d.rel.MX192.MX197	Mbuti	0.232273	0.00313	74.214	183840
Guanzhuang	Russia_Andronovo.SG	Mbuti	0.232249	0.002422	95.884	532813
Guanzhuang	Russia_Viking.SG	Mbuti	0.232244	0.002305	100.754	568638
Guanzhuang	LSH_IA2	Mbuti	0.232235	0.00394	58.945	81043
Guanzhuang	Ukraine_EBA_Yamnaya	Mbuti	0.232234	0.002804	82.813	296839
Guanzhuang	Poland_Viking.SG	Mbuti	0.232227	0.002447	94.917	529725
Guanzhuang	England_Viking.SG	Mbuti	0.232222	0.002286	101.589	588220
Guanzhuang	Moldova_Glinoe_Scythian_o2.SG	Mbuti	0.232219	0.002773	83.752	365105
Guanzhuang	Iceland_Viking_1d.rel.VK111.VK230.SG	Mbuti	0.232197	0.002744	84.618	374153
Guanzhuang	Tajikistan_BA_DashtiKozy	Mbuti	0.232197	0.002537	91.513	408262
Guanzhuang	Kazakhstan_MLBA_Kairan_published	Mbuti	0.232183	0.003652	63.583	76877
Guanzhuang	Ukraine_Mesolithic	Mbuti	0.232179	0.002588	89.697	389120
Guanzhuang	Turkmenistan_IA.SG	Mbuti	0.232167	0.002665	87.113	441538
Guanzhuang	Russia_Ivanovo_Fatyanovo_BA.SG	Mbuti	0.232137	0.002829	82.055	181332
Guanzhuang	Russia_MLBA_Krasnoyarsk	Mbuti	0.232131	0.002335	99.431	506434
Guanzhuang	Sweden_Viking.SG	Mbuti	0.232105	0.002292	101.267	607767
Guanzhuang	Poland_EBA.SG	Mbuti	0.232069	0.002673	86.818	484806
Guanzhuang	Kazakhstan_MLBA_Karagash	Mbuti	0.232056	0.002639	87.94	304736
Guanzhuang	Switzerland_LN_oSteppe	Mbuti	0.23204	0.002986	77.715	231191
Guanzhuang	Russia_Steppe_Eneolithic	Mbuti	0.232027	0.002484	93.409	434714
Guanzhuang	Romania_IronGates_Mesolithic_published	Mbuti	0.232024	0.002895	80.143	205200
Guanzhuang	Balochi.DG	Mbuti	0.232006	0.002489	93.212	534322
Guanzhuang	Norwegian.DG	Mbuti	0.232004	0.002607	89.004	522786
Guanzhuang	Russia_Yaroslavl_Fatyanovo_BA.SG	Mbuti	0.231966	0.0024	96.643	537154
Guanzhuang	Uzbekistan_Kokcha_BA	Mbuti	0.231959	0.002619	88.568	370684
Guanzhuang	Iceland_Viking.SG	Mbuti	0.231954	0.002371	97.834	570716
Guanzhuang	Kazakhstan_MLBA_OyDzhaylau	Mbuti	0.231952	0.002443	94.932	432018
Guanzhuang	Serbia_Mokrin_EBA_Maros_1d.rel.MOK12.SG	Mbuti	0.231935	0.003209	72.274	166612
Guanzhuang	England_EarlyMedieval_Saxon.SG	Mbuti	0.231933	0.002357	98.397	563546
Guanzhuang	Poland_CWC_3.SG	Mbuti	0.231918	0.002541	91.267	530143
Guanzhuang	Russia_EBA_Yamnaya_o	Mbuti	0.231911	0.003489	66.468	118823
Guanzhuang	Ukraine_BA_Catacomb.SG	Mbuti	0.231873	0.003891	59.589	81584
Guanzhuang	Sweden_Gotland_Vasterbjers_PittedWare_BattleAxe_o_minus.SG	Mbuti	0.231852	0.006222	37.265	20643
Guanzhuang	Ukraine_N_son.I1732.SG	Mbuti	0.231849	0.003575	64.857	92356
Guanzhuang	Denmark_Viking_o1.SG	Mbuti	0.231832	0.002819	82.236	375479
Guanzhuang	Estonia_CordedWare	Mbuti	0.231828	0.003289	70.479	160089
Guanzhuang	Hungary_EN_HG_Koros	Mbuti	0.2318	0.002694	86.058	320788
Guanzhuang	Hungarian.DG	Mbuti	0.231759	0.002396	96.711	536883
Guanzhuang	Spain_C_lc	Mbuti	0.231744	0.007479	30.986	15934
Guanzhuang	Italy_Medieval_EarlyModern_oCentralEuropean.SG	Mbuti	0.231717	0.002308	100.384	566770
Guanzhuang	Kazakhstan_MLBA_Alakul_Lisakovskiy	Mbuti	0.231701	0.002695	85.989	302883
Guanzhuang	Russia_HG_contam	Mbuti	0.231686	0.006564	35.298	19313
Guanzhuang	Estonia_EMN_Narva	Mbuti	0.231681	0.00291	79.619	205655
Guanzhuang	Hungary_Koros_EN_o.SG	Mbuti	0.231678	0.004316	53.68	50568
Guanzhuang	Kazakhstan_Kyzlbulak_MLBA1	Mbuti	0.231678	0.002795	82.902	255917
Guanzhuang	Italy_Imperial_o2.SG	Mbuti	0.23165	0.002965	78.136	260406
Guanzhuang	Ukraine_Mesolithic_published	Mbuti	0.231631	0.004349	53.257	59120
Guanzhuang	Scotland_Viking_o.SG	Mbuti	0.231614	0.002573	90.008	489117
Guanzhuang	Italy_IA_Republic_o.SG	Mbuti	0.231595	0.002692	86.038	517937
Guanzhuang	Russia_Sunghir2.SG	Mbuti	0.231549	0.002766	83.712	521307
Guanzhuang	Ukraine_N_published	Mbuti	0.231515	0.00291	79.552	153597
Guanzhuang	Pakistan_Barikot_IA	Mbuti	0.231474	0.002509	92.25	291195
Guanzhuang	Poland_Southeast_CordedWare.SG	Mbuti	0.23147	0.002329	99.376	547143
Guanzhuang	England_BellBeaker	Mbuti	0.231468	0.002299	100.666	535956
Guanzhuang	English.DG	Mbuti	0.231437	0.0024	96.432	536830
Guanzhuang	Russia_Moscow_Fatyanovo_BA.SG	Mbuti	0.231422	0.002531	91.431	465270
Guanzhuang	Russia_IA_Ingria.SG	Mbuti	0.23141	0.002537	91.202	288019
Guanzhuang	Russia_Steppe_Maikop_o2	Mbuti	0.231372	0.002768	83.585	303005
Guanzhuang	Lebanon_Medieval_o5.SG	Mbuti	0.231369	0.003271	70.736	154690
Guanzhuang	Norway_Medieval_o.SG	Mbuti	0.231355	0.004817	48.03	45928
Guanzhuang	Latvia_BA	Mbuti	0.231343	0.002344	98.703	491316
Guanzhuang	Uzbekistan_Bustan_BA_o1	Mbuti	0.231331	0.002925	79.091	249553
Guanzhuang	Kazakhstan_MLBA_Aktogai	Mbuti	0.231317	0.002381	97.134	433632
Guanzhuang	England_IA_Roman.SG	Mbuti	0.231312	0.00235	98.444	551125
Guanzhuang	Russia_Kalmykia_EBA_Yamnaya.SG	Mbuti	0.231299	0.002376	97.36	499908
Guanzhuang	Denmark_EarlyViking.SG	Mbuti	0.231289	0.002432	95.094	541132
Guanzhuang	Switzerland_LN_1d.rel.MX209	Mbuti	0.231286	0.006973	33.169	16173
Guanzhuang	Uzbekistan_Dzharkutan_BA_2	Mbuti	0.231232	0.002579	89.662	417968
Guanzhuang	Iceland_Viking_1d.rel.VK110.VK230.SG	Mbuti	0.231198	0.002905	79.591	288533
Guanzhuang	Russia_MLBA_Potapovka	Mbuti	0.231198	0.003089	74.837	189642
Guanzhuang	Russia_Yaroslavl_Fatyanovo_BA_dup.I7357.SG	Mbuti	0.231171	0.002691	85.91	351806
Guanzhuang	Italy_Tagliente_LPaleolithic	Mbuti	0.231158	0.003875	59.657	86832
Guanzhuang	Ukraine_N_dup.I4112	Mbuti	0.231153	0.009283	24.9	9259
Guanzhuang	Italy_N_oWHG.SG	Mbuti	0.231124	0.002894	79.856	269594
Guanzhuang	Italy_LA_oCentralEuropean_o2CentralEuropean.SG	Mbuti	0.231109	0.002742	84.294	363395
Guanzhuang	Morocco_unknown.SG	Mbuti	0.231097	0.005663	40.807	27653
Guanzhuang	Sweden_Viking_dup.VK348.SG	Mbuti	0.231089	0.009838	23.49	7940
Guanzhuang	Serbia_Mokrin_EBA_Maros_1d.rel.MOK15.SG	Mbuti	0.231088	0.002735	84.485	393209
Guanzhuang	WTL_LBA2	Mbuti	0.231086	0.002713	85.191	356935
Guanzhuang	Mongolia_Chalcolithic_Afanasievo_1	Mbuti	0.231078	0.002782	83.064	297453
Guanzhuang	Hungary_IA_Scythian.SG	Mbuti	0.231021	0.002454	94.133	467595
Guanzhuang	Ukraine_Cimmerians.SG	Mbuti	0.231007	0.003397	68	110323
Guanzhuang	Ukraine_N_brother.I8590_father.or.son.I3718	Mbuti	0.231002	0.005576	41.427	30463
Guanzhuang	Hungary_IA_LaTene	Mbuti	0.23098	0.002778	83.137	375772
Guanzhuang	Czech.DG	Mbuti	0.230976	0.002645	87.331	522997
Guanzhuang	Scotland_C_EBA_mediumhighEEF_published	Mbuti	0.230963	0.002994	77.131	250469
Guanzhuang	Mongolia_Chalcolithic_Afanasievo_1_contam	Mbuti	0.23095	0.004689	49.253	47007
Guanzhuang	Serbia_IronGates_Mesolithic_o_published	Mbuti	0.230926	0.003001	76.949	244113
Guanzhuang	Russia_Ust_Ishim.DG	Mbuti	0.230889	0.002785	82.918	487803
Guanzhuang	Spain_IA_o	Mbuti	0.230879	0.003463	66.665	104035
Guanzhuang	Italy_IA_Republic.SG	Mbuti	0.230834	0.002302	100.282	551282
Guanzhuang	Spain_Roman_oAegean	Mbuti	0.23082	0.006857	33.661	17049
Guanzhuang	Mongolia_Arkhangai_EarlyMedieval_1d.rel.OLN002	Mbuti	0.230813	0.004086	56.489	69003
Guanzhuang	Russia_MBA_Poltavka_oEEF	Mbuti	0.23076	0.00277	83.302	267459
Guanzhuang	Sweden_IA_1.SG	Mbuti	0.230749	0.004149	55.619	58572
Guanzhuang	Italy_Imperial_oCentralEuropean.SG	Mbuti	0.230738	0.002517	91.655	472594
Guanzhuang	Kazakhstan_MLBA_Kyzlbulak_o1	Mbuti	0.230707	0.00293	78.732	278772
Guanzhuang	Italy_LA_oCentralEuropean_o1CentralEuropean.SG	Mbuti	0.230701	0.002377	97.042	542415
Guanzhuang	Kazakhstan_MLBA_KazakhMys	Mbuti	0.230694	0.002383	96.798	390569
Guanzhuang	Italy_Sardinia_C_o	Mbuti	0.230693	0.002733	84.398	368801
Guanzhuang	Switzerland_LN_contam_o	Mbuti	0.230654	0.00619	37.264	21734
Guanzhuang	Iceland_Early_Christian.SG	Mbuti	0.230642	0.00285	80.925	234145
Guanzhuang	Brahui.DG	Mbuti	0.230639	0.002369	97.375	534522
Guanzhuang	Ukraine_EBA_Yamnaya_published	Mbuti	0.230579	0.007853	29.361	13114
Guanzhuang	Spain_Hellenistic_oMixed	Mbuti	0.230565	0.004084	56.462	60073
Guanzhuang	Spain_BA.SG	Mbuti	0.230516	0.002562	89.963	482569
Guanzhuang	Russia_Abkhasian.DG	Mbuti	0.230506	0.002443	94.341	535831
Guanzhuang	Kazakhstan_Maitan_MLBA_Alakul	Mbuti	0.230504	0.002336	98.659	498916
Guanzhuang	Serbia_IronGates_Mesolithic_daughter_I5236	Mbuti	0.230503	0.002854	80.751	339229
Guanzhuang	Lebanon_Medieval_o2.SG	Mbuti	0.230502	0.002766	83.348	316718
Guanzhuang	Iceland_Early_Christian_o.SG	Mbuti	0.230428	0.003438	67.032	118073
Guanzhuang	Turkmenistan_C_Namazga_1d.rel.DA380.SG	Mbuti	0.230379	0.006694	34.414	18681
Guanzhuang	Pakistan_Loebanr_IA_o_published	Mbuti	0.230364	0.00299	77.048	223219
Guanzhuang	Turkey_AsikliHoyuk_EN_Preceramic.SG	Mbuti	0.230352	0.005691	40.477	24380
Guanzhuang	Crimea_Pantikapaion.SG	Mbuti	0.230349	0.002962	77.762	182028
Guanzhuang	Lebanon_Medieval_o4.SG	Mbuti	0.230331	0.002741	84.044	510957
Guanzhuang	Turkmenistan_C_Namazga_o.SG	Mbuti	0.230306	0.002963	77.715	208008
Guanzhuang	Scotland_C_EBA	Mbuti	0.230288	0.002435	94.58	378592
Guanzhuang	Italy_North_Remedello_EBA.SG	Mbuti	0.230286	0.00357	64.508	91682
Guanzhuang	Hungary_Avar_5	Mbuti	0.230255	0.002808	82	310875
Guanzhuang	Germany_BellBeaker	Mbuti	0.230248	0.002273	101.293	551665
Guanzhuang	Tajikistan_C_Sarazm	Mbuti	0.230246	0.002461	93.54	362571
Guanzhuang	Ukraine_Scythian.WGC	Mbuti	0.230206	0.00863	26.675	9691
Guanzhuang	Turkey_N_o	Mbuti	0.230195	0.007467	30.828	16230
Guanzhuang	Ukraine_Viking_o.SG	Mbuti	0.230181	0.002882	79.868	355681
Guanzhuang	Serbia_Mokrin_EBA_Maros.SG	Mbuti	0.230174	0.002277	101.085	574182
Guanzhuang	Russia_Sunghir3.SG	Mbuti	0.23015	0.002815	81.771	528567
Guanzhuang	Sweden_Ansarve_Megalithic.SG	Mbuti	0.230144	0.002448	93.997	544051
Guanzhuang	MXL_oEuropean.SG	Mbuti	0.230142	0.002463	93.446	544111
Guanzhuang	Polish.DG	Mbuti	0.230128	0.002623	87.747	522964
Guanzhuang	Russia_MLBA_Sintashta_brother.I1053	Mbuti	0.230125	0.002843	80.958	339504
Guanzhuang	SSG_BA2	Mbuti	0.230125	0.004325	53.211	50811
Guanzhuang	Kazakhstan_Chanchar_MBA_published	Mbuti	0.230123	0.002932	78.484	254835
Guanzhuang	Sweden_EarlyViking.SG	Mbuti	0.230121	0.003934	58.489	63756
Guanzhuang	Poland_Koszyce_GAC.SG_brother.RISE1169.SG.brother.RISE1173.SG.brother.RISE1163.SG	Mbuti	0.23011	0.002727	84.394	476527
Guanzhuang	Serbia_IronGates_Mesolithic_o	Mbuti	0.23008	0.00271	84.902	331663
Guanzhuang	Russia_Steppe_Catacomb	Mbuti	0.230043	0.002468	93.219	341164
Guanzhuang	Latvia_LN_CordedWare.SG	Mbuti	0.230016	0.003411	67.441	95037
Guanzhuang	Ukraine_Ozera_EBA_Yamnaya	Mbuti	0.229995	0.002942	78.165	225405
Guanzhuang	Pakistan_MIA_LIA	Mbuti	0.229956	0.005011	45.891	35173
Guanzhuang	Spain_C_oSteppe	Mbuti	0.229953	0.002394	96.034	466701
Guanzhuang	Switzerland_EBA_2	Mbuti	0.229953	0.002319	99.156	477246
Guanzhuang	Lithuania_LN_o	Mbuti	0.229912	0.002767	83.086	353059
Guanzhuang	Poland_Ksiaznice_GAC.SG	Mbuti	0.229862	0.002428	94.681	471971
Guanzhuang	Poland_BellBeaker	Mbuti	0.229854	0.002409	95.424	421769
Guanzhuang	Poland_Southeast_CordedWare.SG_father.or.son.pcw040.SG	Mbuti	0.229845	0.003877	59.291	75453
Guanzhuang	Spain_IA_Celt_o	Mbuti	0.229832	0.004755	48.338	42486
Guanzhuang	Netherlands_BA	Mbuti	0.229803	0.002639	87.065	332036
Guanzhuang	Scotland_Mesolithic_all.SG	Mbuti	0.229789	0.00876	26.233	10832
Guanzhuang	Hungary_LBA	Mbuti	0.229782	0.002783	82.555	333436
Guanzhuang	Hungary_EarlyC_Tiszapolgar_Bodrogkeresztur_published	Mbuti	0.229749	0.002836	81.008	340468
Guanzhuang	Spain_Girona_Visigoth	Mbuti	0.22974	0.002416	95.085	334912
Guanzhuang	Russia_MLBA_Krasnoyarsk_father.or.son.I6718	Mbuti	0.229736	0.002889	79.519	238786
Guanzhuang	Lezgin.DG	Mbuti	0.229732	0.002416	95.082	536068
Guanzhuang	Kazakhstan_Central_Tasmola_o1.SG	Mbuti	0.229678	0.004836	47.498	40620
Guanzhuang	Portugal_MN.SG	Mbuti	0.229661	0.002374	96.75	554651
Guanzhuang	Sweden_Viking_fail.due.to.high.heterozygosity.SG	Mbuti	0.22964	0.00377	60.914	89020
Guanzhuang	Russia_Afanasievo_published	Mbuti	0.229619	0.002792	82.243	236391
Guanzhuang	Pakistan_Udegram_IA_1d.rel.I1985	Mbuti	0.229587	0.00877	26.178	8480
Guanzhuang	Poland_Southeast_BellBeaker.SG	Mbuti	0.229586	0.002577	89.098	387758
Guanzhuang	Iceland_Pre_Christian.SG	Mbuti	0.229572	0.002353	97.576	571761
Guanzhuang	Poland_Koszyce_GAC.SG_brother.RISE1169.SG.brother.RISE1168.SG.brother.RISE1163.SG	Mbuti	0.229555	0.002644	86.823	491461
Guanzhuang	Avar.SG	Mbuti	0.229546	0.002718	84.439	492501
Guanzhuang	Germany_CordedWare.SG	Mbuti	0.229546	0.003643	63.008	83094
Guanzhuang	Estonia_IA_lc.SG	Mbuti	0.229468	0.007168	32.012	13314
Guanzhuang	Armenia_LBA_LchashenMetsamor.SG	Mbuti	0.229442	0.002638	86.976	380199
Guanzhuang	Portugal_LN_C.SG	Mbuti	0.229438	0.002445	93.858	539125
Guanzhuang	England_Viking_o.SG	Mbuti	0.229429	0.002604	88.111	435386
Guanzhuang	Italy_N_dup.I16762.SG	Mbuti	0.229426	0.002935	78.158	237750
Guanzhuang	Bergamo.DG	Mbuti	0.229417	0.00259	88.593	522582
Guanzhuang	Romania_Glavanesti_o1	Mbuti	0.229413	0.006507	35.256	20104
Guanzhuang	Russia_Afanasievo_son.I3388_son.I3950_brother.I6714	Mbuti	0.229404	0.002691	85.261	268312
Guanzhuang	JMCY_HE2	Mbuti	0.229396	0.002784	82.394	300642
Guanzhuang	Tuscan_1.DG	Mbuti	0.229387	0.002427	94.524	536520
Guanzhuang	Gibraltar_EN	Mbuti	0.229383	0.003479	65.936	116545
Guanzhuang	Italy_North_BellBeaker_1	Mbuti	0.229372	0.003184	72.031	154029
Guanzhuang	Poland_ChopiceVeseleCulture	Mbuti	0.229372	0.002639	86.9	333503
Guanzhuang	Hungary_Langobard	Mbuti	0.229362	0.002327	98.562	492454
Guanzhuang	Turkmenistan_Gonur_BA_1_lc	Mbuti	0.22932	0.004526	50.67	43388
Guanzhuang	Basque.DG	Mbuti	0.229314	0.00242	94.763	536446
Guanzhuang	Poland_Koszyce_GAC.SG_son.RISE1159.SG.son.RISE1168.SG	Mbuti	0.229294	0.002649	86.552	443979
Guanzhuang	Poland_GAC.SG	Mbuti	0.22926	0.002659	86.232	466074
Guanzhuang	Romania_PesteraMuierii_EUP	Mbuti	0.22925	0.002769	82.8	532672
Guanzhuang	TBLS_LBA	Mbuti	0.229219	0.002762	83.005	416763
Guanzhuang	Turkey_Hellenistic_WestMediterranean_possible.SG	Mbuti	0.229207	0.004742	48.339	44812
Guanzhuang	Kazakhstan_MLBA_Kairan	Mbuti	0.229197	0.002376	96.449	412835
Guanzhuang	Uzbekistan_SappaliTepe_BA_o	Mbuti	0.229196	0.003452	66.389	134871
Guanzhuang	Pakistan_Medieval_RajaGira	Mbuti	0.229186	0.002634	86.997	351027
Guanzhuang	Mongolia_Bayankhongor_EBA	Mbuti	0.229183	0.002571	89.143	337355
Guanzhuang	Latvia_LN_CordedWare	Mbuti	0.229179	0.004047	56.624	65005
Guanzhuang	Spain_Greek_oLocal	Mbuti	0.22917	0.002588	88.545	411566
Guanzhuang	Italian_North.DG	Mbuti	0.229149	0.002619	87.502	522657
Guanzhuang	England_LBA	Mbuti	0.229143	0.002645	86.635	305176
Guanzhuang	Netherlands_BellBeaker	Mbuti	0.229132	0.002422	94.609	433783
Guanzhuang	Portugal_C.SG	Mbuti	0.229118	0.002687	85.268	470874
Guanzhuang	Croatia_C_Lasinja_contam	Mbuti	0.229099	0.00461	49.693	48879
Guanzhuang	Tajikistan_Ksirov_Kushan	Mbuti	0.229072	0.002617	87.537	302895
Guanzhuang	TSI.SG	Mbuti	0.229065	0.002263	101.22	600095
Guanzhuang	Bulgarian.DG	Mbuti	0.229051	0.00236	97.065	536375
Guanzhuang	Scotland_MBA	Mbuti	0.228995	0.002443	93.748	398928
Guanzhuang	Russia_Kostenki14	Mbuti	0.228976	0.0029	78.945	477051
Guanzhuang	Russia_Moscow_Fatyanovo_BA_dup.I7351.SG	Mbuti	0.228975	0.002873	79.695	335170
Guanzhuang	Spain_Formentera_MBA	Mbuti	0.228948	0.004462	51.314	53153
Guanzhuang	Russia_North_Caucasus	Mbuti	0.228943	0.002513	91.094	338215
Guanzhuang	Italy_Medieval_o1.SG	Mbuti	0.22892	0.00288	79.48	358953
Guanzhuang	Spain_ElMiron	Mbuti	0.228877	0.003114	73.495	224683
Guanzhuang	Ireland_EN.SG	Mbuti	0.228863	0.002389	95.806	544082
Guanzhuang	Ireland_Megalithic.SG	Mbuti	0.228825	0.002412	94.853	554439
Guanzhuang	Spain_LBA_published	Mbuti	0.228822	0.003258	70.232	111407
Guanzhuang	Bulgaria_EBA_o2	Mbuti	0.228797	0.002712	84.351	320262
Guanzhuang	Ukraine_Scythian.SG	Mbuti	0.228772	0.002541	90.045	503590
Guanzhuang	Uzbekistan_Kashkarchi_BA	Mbuti	0.228772	0.002632	86.921	281084
Guanzhuang	Switzerland_EBA_2_1d.rel.MX195.MX197	Mbuti	0.228765	0.003206	71.346	173241
Guanzhuang	Spain_Medieval	Mbuti	0.228762	0.002588	88.385	310860
Guanzhuang	Israel_MLBA_published	Mbuti	0.228706	0.004364	52.402	55598
Guanzhuang	Serbia_Mokrin_EBA_Maros_oAegean.SG	Mbuti	0.228683	0.002537	90.144	419999
Guanzhuang	Hungary_EBA_BellBeaker	Mbuti	0.228673	0.002337	97.861	511745
Guanzhuang	Sweden_LN.SG	Mbuti	0.228654	0.002611	87.573	476400
Guanzhuang	Poland_Koszyce_GAC.SG_son.RISE1170.SG.brother.RISE1164.SG	Mbuti	0.228643	0.002729	83.772	335819
Guanzhuang	Hungary_LateC_Baden_contam	Mbuti	0.228636	0.005438	42.046	29944
Guanzhuang	Spain_Islamic_Emirate	Mbuti	0.228617	0.00552	41.418	30379
Guanzhuang	Kazakhstan_AkMoustafa_MLBA1	Mbuti	0.228612	0.002802	81.597	275712
Guanzhuang	Poland_Koszyce_GAC.SG_daughter.RISE1170.SG.sister.RISE1164.SG	Mbuti	0.228607	0.002762	82.767	494775
Guanzhuang	Spain_IA_published	Mbuti	0.228584	0.002687	85.08	244857
Guanzhuang	Turkey_Alalakh_MLBA_o	Mbuti	0.228566	0.002861	79.9	259035
Guanzhuang	Ireland_N.SG	Mbuti	0.228553	0.002617	87.33	530751
Guanzhuang	Russia_Caucasus_EBA_Yamnaya	Mbuti	0.228518	0.002653	86.14	272739
Guanzhuang	Albanian.DG	Mbuti	0.228501	0.002605	87.72	523067
Guanzhuang	Italy_Sardinia_C_BA.SG	Mbuti	0.228497	0.00248	92.139	474315
Guanzhuang	Poland_Koszyce_GAC.SG_daughter.RISE1166.SG.sister.RISE1171.SG	Mbuti	0.228497	0.0026	87.9	476246
Guanzhuang	IBS.SG	Mbuti	0.228495	0.00225	101.535	601263
Guanzhuang	Russia_Kostenki14.SG	Mbuti	0.228485	0.002874	79.511	468407
Guanzhuang	Hungary_IA_Scythian_o.SG	Mbuti	0.228477	0.003005	76.024	210480
Guanzhuang	Poland_Ksiaznice_GAC.SG_mother.or.daughter.RISE1248.SG	Mbuti	0.228471	0.002906	78.625	274456
Guanzhuang	Italy_IA_Republic_oEasternMediterranean.SG	Mbuti	0.228466	0.002594	88.086	477409
Guanzhuang	Kazakhstan_MLBA_Bylkyldak	Mbuti	0.228459	0.002708	84.354	322897
Guanzhuang	Armenia_MBA.SG	Mbuti	0.228442	0.003088	73.967	162122
Guanzhuang	Serbia_Mokrin_EBA_Maros_1d.rel.MOK32.SG	Mbuti	0.22844	0.002768	82.515	307658
Guanzhuang	Russia_Srubnaya_1d.rel.I0430	Mbuti	0.228423	0.003922	58.249	68550
Guanzhuang	Italy_Medieval_EarlyModern_o.SG	Mbuti	0.228396	0.002971	76.865	264919
Guanzhuang	Poland_Koszyce_GAC.SG	Mbuti	0.228376	0.002305	99.074	559105
Guanzhuang	Mongolia_Arkhangai_MLBAtoEIAorMedieval	Mbuti	0.228369	0.002963	77.086	177104
Guanzhuang	Italy_LA_oSardiniaLike.SG	Mbuti	0.228368	0.002801	81.539	327148
Guanzhuang	England_C_EBA	Mbuti	0.228361	0.00229	99.742	503540
Guanzhuang	Kazakhstan_MLBA_Solyanka	Mbuti	0.228358	0.003704	61.658	106124
Guanzhuang	Hungary_Avar_5_daughter.or.mother.AV1	Mbuti	0.228356	0.002871	79.541	291624
Guanzhuang	Sweden_LNBA	Mbuti	0.228338	0.002839	80.429	235392
Guanzhuang	Sweden_Viking_1d.rel.VK406.SG	Mbuti	0.228337	0.002815	81.106	241046
Guanzhuang	Ukraine_EBA_published	Mbuti	0.228298	0.00299	76.352	179499
Guanzhuang	Wales_Mesolithic	Mbuti	0.228297	0.003396	67.232	115391
Guanzhuang	Turkmenistan_C_Geoksyur_possible.1d.rel.I8503	Mbuti	0.228285	0.004983	45.813	39476
Guanzhuang	Ukraine_Chernyakhiv.SG	Mbuti	0.228283	0.003123	73.091	128124
Guanzhuang	Denmark_Djursland_SingleGraveCulture.SG	Mbuti	0.228229	0.00278	82.11	325808
Guanzhuang	Portugal_MBA.SG	Mbuti	0.228217	0.002452	93.083	514719
Guanzhuang	Russia_Yaroslavl_Fatyanovo_BA_dup.I7353.SG	Mbuti	0.228214	0.004638	49.202	42290
Guanzhuang	Denmark_BA.SG	Mbuti	0.228202	0.006087	37.489	22562
Guanzhuang	Russia_North_Caucasus_MBA_rel.KBD001	Mbuti	0.228173	0.002725	83.72	288485
Guanzhuang	Spain_NazariPeriod_Muslim_o_published	Mbuti	0.228165	0.005087	44.849	34690
Guanzhuang	Iranian.DG	Mbuti	0.228147	0.002383	95.722	535426
Guanzhuang	Turkmenistan_BA_Gonur_3	Mbuti	0.228129	0.004807	47.453	39112
Guanzhuang	Uzbekistan_ZamanBaba_N_contam	Mbuti	0.228117	0.010581	21.56	6941
Guanzhuang	Portugal_EBA	Mbuti	0.228115	0.004203	54.278	52728
Guanzhuang	Poland_BellBeaker_father.I6582_father.I6535	Mbuti	0.228095	0.003137	72.72	220485
Guanzhuang	Poland_Wilczyce_GAC.SG	Mbuti	0.228082	0.003021	75.508	178530
Guanzhuang	Spain_EBA_Mallorca	Mbuti	0.228047	0.003858	59.103	83095
Guanzhuang	Spain_IA	Mbuti	0.227998	0.002415	94.428	395984
Guanzhuang	Spain_EBA	Mbuti	0.227992	0.002275	100.214	536416
Guanzhuang	Poland_Medieval_2.SG	Mbuti	0.227978	0.004353	52.367	50073
Guanzhuang	Ireland_MN.SG	Mbuti	0.22797	0.002311	98.627	580845
Guanzhuang	Wales_C_EBA	Mbuti	0.227953	0.003383	67.381	130726
Guanzhuang	Italy_C.SG	Mbuti	0.227927	0.002417	94.314	537232
Guanzhuang	Spain_Girona_Visigoth_1d.rel.I12032_published	Mbuti	0.227924	0.007385	30.864	14015
Guanzhuang	Italy_Medieval_EarlyModern.SG	Mbuti	0.227907	0.002249	101.357	574027
Guanzhuang	Italy_Medieval.SG	Mbuti	0.227904	0.002446	93.178	515715
Guanzhuang	Italy_North_Remedello_C.SG	Mbuti	0.22787	0.002808	81.139	292492
Guanzhuang	Luxembourg_Loschbour	Mbuti	0.227869	0.003365	67.715	195959
Guanzhuang	Kazakhstan_Georgievsky_MBA_published	Mbuti	0.227866	0.002952	77.2	195254
Guanzhuang	Spain_Menorca_LBA	Mbuti	0.227853	0.00281	81.084	287404
Guanzhuang	Spain_LN.SG	Mbuti	0.227819	0.002978	76.504	155437
Guanzhuang	Spain_C.SG	Mbuti	0.227798	0.002394	95.155	544874
Guanzhuang	Hungary_EBA_Mako	Mbuti	0.227775	0.002832	80.431	289380
Guanzhuang	Spain_Medieval_published	Mbuti	0.227769	0.002996	76.022	181200
Guanzhuang	Uzbekistan_Bustan_BA	Mbuti	0.227765	0.002378	95.765	419310
Guanzhuang	Italy_Sicily_MN	Mbuti	0.227747	0.002428	93.803	503752
Guanzhuang	Spain_C_oAnatolia.SG	Mbuti	0.227742	0.00269	84.671	529016
Guanzhuang	Iceland_Pre_Christian.SG_son.DAV.A8.SG	Mbuti	0.227693	0.003952	57.616	58005
Guanzhuang	Hungary_EarlyC_Tiszapolgar	Mbuti	0.227687	0.002924	77.858	214929
Guanzhuang	Serbia_IronGates_N	Mbuti	0.227682	0.003409	66.779	105199
Guanzhuang	Turkmenistan_BA_Gonur_4	Mbuti	0.227678	0.005221	43.605	33602
Guanzhuang	Lithuania_EMN_Narva_twin.Kretuonas2	Mbuti	0.227675	0.004091	55.652	65320
Guanzhuang	Ireland_LN.SG	Mbuti	0.227667	0.002407	94.589	549132
Guanzhuang	Cretan.DG	Mbuti	0.227594	0.002475	91.97	536375
Guanzhuang	Scotland_BellBeaker	Mbuti	0.227572	0.002547	89.351	314692
Guanzhuang	Scotland_Megalithic.SG	Mbuti	0.227538	0.002565	88.725	422433
Guanzhuang	Iran_BA_HajjiFiruz	Mbuti	0.227518	0.002714	83.825	354112
Guanzhuang	Uzbekistan_Bustan_Eneolithic	Mbuti	0.227513	0.002945	77.264	241650
Guanzhuang	Poland_EBA	Mbuti	0.227476	0.002794	81.405	293687
Guanzhuang	India_RoopkundB_oCentralEuropean_published	Mbuti	0.227466	0.007122	31.938	15183
Guanzhuang	Wales_MBA_published	Mbuti	0.227335	0.006939	32.76	18850
Guanzhuang	Scotland_LBA	Mbuti	0.227333	0.002418	94.028	414395
Guanzhuang	Montenegro_IA_dup.I13170.SG	Mbuti	0.227332	0.010896	20.864	6070
Guanzhuang	Russia_Petrovka	Mbuti	0.227295	0.003118	72.888	124108
Guanzhuang	Spain_C_father.or.son.I1314	Mbuti	0.227292	0.00696	32.659	17534
Guanzhuang	Portugal_C	Mbuti	0.227275	0.002272	100.052	486195
Guanzhuang	Italy_North_Villabruna_HG	Mbuti	0.22727	0.002954	76.943	350449
Guanzhuang	Turkmenistan_Gonur_BA_1	Mbuti	0.227249	0.002303	98.667	403585
Guanzhuang	Portugal_LN_C	Mbuti	0.227233	0.002833	80.195	341460
Guanzhuang	India_RoopkundB_oNearEast	Mbuti	0.227231	0.003117	72.893	219558
Guanzhuang	Ireland_EN_MN.SG	Mbuti	0.227226	0.002413	94.157	547400
Guanzhuang	Spanish.DG	Mbuti	0.227214	0.002444	92.955	536344
Guanzhuang	Hungary_LateC_Baden	Mbuti	0.227202	0.002345	96.89	494616
Guanzhuang	Russia_Yaroslavl_Fatyanovo_BA_dup.I7354.SG	Mbuti	0.227178	0.00435	52.224	48781
Guanzhuang	Makrani.DG	Mbuti	0.227166	0.002355	96.455	534120
Guanzhuang	Ukraine_Eneolithic	Mbuti	0.227165	0.002698	84.201	227523
Guanzhuang	England_N.SG	Mbuti	0.227132	0.002354	96.48	556935
Guanzhuang	Wales_Mesolithic.SG	Mbuti	0.227107	0.003484	65.183	102558
Guanzhuang	Germany_BA.SG	Mbuti	0.227087	0.004841	46.91	37275
Guanzhuang	Poland_Koszyce_GAC.SG_mother.RISE1163.SG.mother.RISE1173.SG	Mbuti	0.227061	0.002615	86.841	493736
Guanzhuang	Spain_EN.SG	Mbuti	0.227052	0.002473	91.817	523941
Guanzhuang	Poland_Koszyce_GAC.SG_son.RISE1166.SG.brother.RISE1167.SG	Mbuti	0.227043	0.002568	88.42	481479
Guanzhuang	Spain_C	Mbuti	0.227031	0.002292	99.071	547593
Guanzhuang	Bulgaria_MalakPreslavets_N_oHighEEF_published	Mbuti	0.227012	0.006782	33.475	18116
Guanzhuang	Russia_MLBA_Sintashta_1d.rel.I1055	Mbuti	0.22699	0.004483	50.634	49310
Guanzhuang	Italy_Imperial.SG	Mbuti	0.226975	0.002234	101.614	585213
Guanzhuang	Spain_MLN_published	Mbuti	0.226967	0.002728	83.19	235971
Guanzhuang	Spain_MLN_1d.rel.I7594_published	Mbuti	0.226945	0.008072	28.115	11021
Guanzhuang	Spain_Girona_Visigoth_published	Mbuti	0.226939	0.003697	61.392	74155
Guanzhuang	Poland_Koszyce_GAC.SG_brother.RISE1168.SG.brother.RISE1173.SG.brother.RISE1163.SG	Mbuti	0.226936	0.00284	79.898	319500
Guanzhuang	Switzerland_LN	Mbuti	0.22692	0.002307	98.375	522097
Guanzhuang	Russia_Caucasus_LateMaikop	Mbuti	0.226901	0.0027	84.028	299016
Guanzhuang	Croatia_Vucedol	Mbuti	0.226857	0.00386	58.777	74082
Guanzhuang	Sardinian.DG	Mbuti	0.226848	0.002295	98.828	544149
Guanzhuang	Hungary_Hunyadihalom_MCHA	Mbuti	0.226839	0.002889	78.518	254089
Guanzhuang	Spain_EBA_1d.rel.I4561	Mbuti	0.226827	0.003321	68.291	135679
Guanzhuang	Armenian.DG	Mbuti	0.226818	0.002335	97.135	536205
Guanzhuang	Poland_EBA_Unetice.SG	Mbuti	0.226813	0.002745	82.614	233196
Guanzhuang	Sweden_TRB_MN.SG	Mbuti	0.226768	0.002697	84.093	286111
Guanzhuang	Uzbekistan_SappaliTepe_BA	Mbuti	0.226744	0.002244	101.037	535701
Guanzhuang	Spain_MLN	Mbuti	0.226719	0.002291	98.964	538791
Guanzhuang	Italy_Sardinia_BA_Nuragic_o	Mbuti	0.226689	0.002585	87.706	440361
Guanzhuang	ABST_IA3	Mbuti	0.226659	0.002981	76.022	205201
Guanzhuang	Spain_Greek_oAegean	Mbuti	0.226639	0.002836	79.919	340518
Guanzhuang	Poland_BKG.SG	Mbuti	0.226628	0.002329	97.307	557754
Guanzhuang	Serbia_Mokrin_EBA_Maros_1d.rel.MOK24A.SG	Mbuti	0.22662	0.002773	81.729	336358
Guanzhuang	Hungary_Baden_LateCA.SG	Mbuti	0.226608	0.002756	82.231	335891
Guanzhuang	Ukraine_N_son.I1732	Mbuti	0.226545	0.004359	51.977	56045
Guanzhuang	Italy_LA.SG	Mbuti	0.226482	0.002261	100.177	571863
Guanzhuang	Georgian.DG	Mbuti	0.226465	0.002338	96.858	535899
Guanzhuang	Belgium_UP_Magdalenian	Mbuti	0.226445	0.003106	72.906	156560
Guanzhuang	Spain_Carolingian	Mbuti	0.226441	0.002988	75.79	177993
Guanzhuang	Italy_Sardinia_BA_Nuragic	Mbuti	0.226436	0.002323	97.476	530477
Guanzhuang	Sweden_Late_N.SG	Mbuti	0.226425	0.002788	81.226	209922
Guanzhuang	Uzbekistan_Dzharkutan_BA_1	Mbuti	0.226411	0.002319	97.634	456262
Guanzhuang	Lebanon_IA2.SG	Mbuti	0.226405	0.002537	89.251	373864
Guanzhuang	Turkmenistan_EBA_Parkhai	Mbuti	0.226382	0.002727	83.003	344594
Guanzhuang	Sweden_Gotland_Vasterbjers_PittedWare_BattleAxe_o.SG	Mbuti	0.226381	0.007642	29.622	12929
Guanzhuang	Italy_Sardinia_EBA	Mbuti	0.226321	0.002297	98.547	536949
Guanzhuang	Russia_North_Caucasus_MBA	Mbuti	0.226309	0.002464	91.837	415351
Guanzhuang	Turkmenistan_LBA_Sumbar	Mbuti	0.226281	0.002848	79.455	263110
Guanzhuang	Turkey_CamlibelTarlasi_LateC_1d.rel.CBT004	Mbuti	0.226251	0.003086	73.319	185239
Guanzhuang	Hungary_LateC_Baden_published	Mbuti	0.226168	0.002495	90.653	395825
Guanzhuang	Croatia_LateC_EBA_Vucedol	Mbuti	0.226164	0.003225	70.131	135382
Guanzhuang	Spain_MBA_Formentera_all	Mbuti	0.226155	0.002886	78.354	263653
Guanzhuang	Italy_N.SG	Mbuti	0.22615	0.002378	95.1	556331
Guanzhuang	Ukraine_Eneolithic_Trypillia_published	Mbuti	0.226104	0.005956	37.963	24880
Guanzhuang	Italy_Sardinia_C	Mbuti	0.226053	0.002542	88.927	366601
Guanzhuang	Scotland_N.SG	Mbuti	0.22604	0.002517	89.817	347185
Guanzhuang	Scotland_N	Mbuti	0.226037	0.002278	99.223	539052
Guanzhuang	Hungary_EBA_Protonagyrev	Mbuti	0.225994	0.002771	81.554	292767
Guanzhuang	Belgium_UP_Magdalenian_udg	Mbuti	0.225971	0.003557	63.52	91727
Guanzhuang	Uzbekistan_SappaliTepe_BA2	Mbuti	0.22597	0.002502	90.299	414363
Guanzhuang	JRTG_LBA1	Mbuti	0.22593	0.002964	76.216	241294
Guanzhuang	Turkmenistan_LBA_Parkhai	Mbuti	0.225924	0.002753	82.055	327111
Guanzhuang	Spain_MBA	Mbuti	0.225911	0.002507	90.125	417791
Guanzhuang	Turkey_Boncuklu_N.SG	Mbuti	0.225904	0.002657	85.017	494418
Guanzhuang	Italy_Sardinia_EarlyMedieval_published	Mbuti	0.225889	0.005645	40.018	25890
Guanzhuang	Iran_IA_HajjiFiruz	Mbuti	0.225875	0.003073	73.513	160859
Guanzhuang	G218_BA3	Mbuti	0.225853	0.00313	72.154	154929
Guanzhuang	Uzbekistan_Dzharkutan_BA_3	Mbuti	0.225808	0.002763	81.712	276687
Guanzhuang	Turkey_N.DG	Mbuti	0.225769	0.002612	86.446	525098
Guanzhuang	Switzerland_EBA_1_1d.rel.TU876(SX10)	Mbuti	0.225738	0.004461	50.597	58580
Guanzhuang	Austria_EN_LBK	Mbuti	0.225707	0.002683	84.135	365455
Guanzhuang	KKSX_IA3	Mbuti	0.225687	0.003598	62.724	91404
Guanzhuang	Poland_Globular_Amphora_published	Mbuti	0.225641	0.005778	39.049	26550
Guanzhuang	JRTG_LBA2	Mbuti	0.225613	0.0034	66.355	114218
Guanzhuang	Poland_BellBeaker_published	Mbuti	0.225601	0.005021	44.928	35670
Guanzhuang	Croatia_MBA	Mbuti	0.225578	0.002624	85.968	327179
Guanzhuang	Hungary_LBA_EIA_dup.I11683	Mbuti	0.225557	0.006262	36.022	18866
Guanzhuang	Russia_MLBA_Sintashta_brother.I1086	Mbuti	0.225549	0.00601	37.529	25162
Guanzhuang	Spain_C_father.or.son.I0460	Mbuti	0.225513	0.004237	53.231	52927
Guanzhuang	Austria_Krems1_1	Mbuti	0.225509	0.002857	78.927	252559
Guanzhuang	Poland_Mierzanowice_GAC.SG	Mbuti	0.2255	0.003151	71.555	173070
Guanzhuang	Turkey_C	Mbuti	0.225485	0.002695	83.665	404487
Guanzhuang	Russia_MLBA_Sintashta.SG	Mbuti	0.22546	0.002514	89.698	424426
Guanzhuang	England_N	Mbuti	0.225412	0.00235	95.911	511812
Guanzhuang	Serbia_EN_Starcevo	Mbuti	0.225388	0.002769	81.383	327811
Guanzhuang	Hungary_C_Balaton_Lasinja	Mbuti	0.225308	0.002426	92.873	391242
Guanzhuang	Turkmenistan_C_Geoksyur_1.or.2d.rel.I8524_1d.rel.I8505	Mbuti	0.225307	0.003885	57.989	73709
Guanzhuang	Switzerland_EBA_2_father.or.son.RA64	Mbuti	0.22526	0.003302	68.21	142338
Guanzhuang	Hungary_EarlyC_Tiszapolgar_contam	Mbuti	0.225249	0.004101	54.93	61695
Guanzhuang	Iran_ShahrISokhta_BA2	Mbuti	0.225243	0.002994	75.237	203355
Guanzhuang	Turkey_MLBA_AssyrianColonyPeriod.SG	Mbuti	0.225186	0.002586	87.095	342263
Guanzhuang	Iran_Hasanlu_IA.SG	Mbuti	0.225182	0.002708	83.17	437898
Guanzhuang	Denmark_LN_BA.SG	Mbuti	0.225163	0.004294	52.442	49530
Guanzhuang	Spain_EBA_1d.rel.I4560	Mbuti	0.225154	0.002836	79.404	231589
Guanzhuang	Turkmenistan_C_Geoksyur	Mbuti	0.225152	0.002274	99	446277
Guanzhuang	Russia_Sunghir4.SG	Mbuti	0.225151	0.002789	80.719	520720
Guanzhuang	Austria_N_LBK	Mbuti	0.225148	0.002493	90.321	456642
Guanzhuang	Poland_Sandomierz_GAC.SG	Mbuti	0.225131	0.002657	84.716	375070
Guanzhuang	Bulgaria_C_oSteppe_published	Mbuti	0.225101	0.006428	35.02	20420
Guanzhuang	Scotland_N_mediumlowEEF	Mbuti	0.225089	0.002462	91.419	407362
Guanzhuang	Hungary_LateC_Protoboleraz_published	Mbuti	0.225084	0.002483	90.668	441694
Guanzhuang	Spain_C_published	Mbuti	0.22507	0.002621	85.881	292631
Guanzhuang	Russia_Caucasus_Maikop_Novosvobodnaya	Mbuti	0.225059	0.002574	87.419	294457
Guanzhuang	PUR_oEuropean.SG	Mbuti	0.225024	0.002871	78.38	528887
Guanzhuang	Spain_Visigoth_Granada_published_contam	Mbuti	0.225007	0.005881	38.263	23190
Guanzhuang	Russia_Yaroslavl_Fatyanovo_BA_dup.I7662.SG	Mbuti	0.22497	0.003568	63.051	87783
Guanzhuang	Armenia_MBA	Mbuti	0.224952	0.002864	78.542	332900
Guanzhuang	Bulgaria_MalakPreslavets_N_oLowEEF_1d.rel.I1108	Mbuti	0.224928	0.003415	65.866	127808
Guanzhuang	Sweden_Viking_lc.SG	Mbuti	0.224923	0.006752	33.311	16551
Guanzhuang	Spain_IA_Celt	Mbuti	0.224915	0.002584	87.058	377769
Guanzhuang	Turkey_N.SG	Mbuti	0.224883	0.00243	92.526	547495
Guanzhuang	Israel_MLBA_o	Mbuti	0.224857	0.002719	82.705	225229
Guanzhuang	Poland_BKG_o1.SG	Mbuti	0.22484	0.00285	78.886	280472
Guanzhuang	Netherlands_BellBeaker_published	Mbuti	0.224837	0.009667	23.258	8505
Guanzhuang	India_RoopkundB	Mbuti	0.224765	0.002316	97.031	455042
Guanzhuang	Poland_TRB.SG	Mbuti	0.224761	0.00253	88.842	503347
Guanzhuang	Italy_Imperial_o3.SG	Mbuti	0.224723	0.002422	92.78	481306
Guanzhuang	Bulgaria_EBA	Mbuti	0.2247	0.002743	81.92	304464
Guanzhuang	Portugal_LN_C_o.SG	Mbuti	0.224697	0.005446	41.262	27597
Guanzhuang	Scotland_C_EBA_mediumhighEEF	Mbuti	0.224692	0.003134	71.684	162771
Guanzhuang	Turkey_EBA	Mbuti	0.224662	0.002415	93.032	451507
Guanzhuang	Bulgaria_IA	Mbuti	0.224658	0.002935	76.534	227440
Guanzhuang	Scotland_N_mediumlowEEF.SG	Mbuti	0.224625	0.003067	73.248	207631
Guanzhuang	Russia_Caucasus_Maikop	Mbuti	0.224619	0.003395	66.16	133562
Guanzhuang	Spain_MN.SG	Mbuti	0.224609	0.002682	83.747	362080
Guanzhuang	Switzerland_LN_1d.rel.Aes14	Mbuti	0.224609	0.003432	65.448	115628
Guanzhuang	Poland_TRB_o.SG	Mbuti	0.22458	0.002669	84.15	457020
Guanzhuang	Turkey_OldHittitePeriod.SG	Mbuti	0.22456	0.002462	91.2	483379
Guanzhuang	Denmark_LN.SG	Mbuti	0.224512	0.004753	47.234	42573
Guanzhuang	Bulgaria_MalakPreslavets_N_oLowEEF	Mbuti	0.224494	0.003892	57.68	77275
Guanzhuang	Poland_Viking_father.or.son.VK156.SG	Mbuti	0.224467	0.005914	37.954	22305
Guanzhuang	Armenia_C	Mbuti	0.224464	0.002318	96.852	458831
Guanzhuang	Croatia_N_Starcevo	Mbuti	0.224452	0.002713	82.725	334200
Guanzhuang	Russia_MLBA_Sintashta_published	Mbuti	0.224447	0.003601	62.321	103654
Guanzhuang	Armenia_EBA	Mbuti	0.224413	0.002476	90.623	441943
Guanzhuang	Gibraltar_EBA	Mbuti	0.224397	0.002899	77.394	188226
Guanzhuang	Estonia_IdaViru_CordedWare_Neolithic.SG	Mbuti	0.224383	0.004302	52.153	49067
Guanzhuang	Russia_Caucasus_LateMaikop_rel.MK5004	Mbuti	0.224383	0.002826	79.391	262478
Guanzhuang	Denmark_MN_B.SG	Mbuti	0.224348	0.003842	58.395	85012
Guanzhuang	Lebanon_MBA.SG	Mbuti	0.224277	0.002298	97.603	544591
Guanzhuang	Scotland_N_mediumlowEEF_all.SG	Mbuti	0.224232	0.002937	76.344	229477
Guanzhuang	Romania_C_Bodrogkeresztur	Mbuti	0.224218	0.002427	92.373	441861
Guanzhuang	Wales_N.SG	Mbuti	0.2242	0.0027	83.042	247208
Guanzhuang	Turkey_N	Mbuti	0.224183	0.00228	98.338	550283
Guanzhuang	Lebanon_Roman.SG	Mbuti	0.224148	0.002335	96.014	521653
Guanzhuang	Croatia_C_Lasinja	Mbuti	0.224147	0.002255	99.385	532230
Guanzhuang	Turkmenistan_C_Namazga.SG	Mbuti	0.224144	0.002563	87.461	305547
Guanzhuang	Israel_Ashkelon_IA1_o	Mbuti	0.224105	0.003954	56.673	67710
Guanzhuang	Wales_N	Mbuti	0.224097	0.002762	81.142	243659
Guanzhuang	Spain_Visigoth_Barcelona	Mbuti	0.224086	0.002983	75.13	159662
Guanzhuang	Turkey_TepecikCiftlik_N.SG	Mbuti	0.224076	0.002603	86.087	353199
Guanzhuang	Russia_LateMaikop_1d.rel.I11131.I11133	Mbuti	0.224048	0.002861	78.299	275935
Guanzhuang	Turkmenistan_MBA_Parkhai	Mbuti	0.224024	0.002708	82.716	316426
Guanzhuang	Russia_Caucasus_KuraAraxes_o1_dup.VEK007	Mbuti	0.223997	0.003593	62.35	99413
Guanzhuang	Poland_Globular_Amphora	Mbuti	0.223986	0.002638	84.898	268924
Guanzhuang	Bulgaria_Varna_C_contam	Mbuti	0.223977	0.003286	68.171	139206
Guanzhuang	Ukraine_Globular_Amphora	Mbuti	0.223975	0.002503	89.478	417756
Guanzhuang	Scotland_N_published	Mbuti	0.223936	0.004485	49.931	43727
Guanzhuang	Turkey_Arslantepe_LateC	Mbuti	0.223935	0.002238	100.06	534733
Guanzhuang	Italy_Medieval_o2.SG	Mbuti	0.223908	0.002745	81.58	382509
Guanzhuang	Turkmenistan_LBA_Parkhai_o	Mbuti	0.223836	0.002699	82.917	323138
Guanzhuang	Ireland_Megalithic.SG_father.prs002-ALL_DATA.SG	Mbuti	0.223827	0.004255	52.601	52024
Guanzhuang	Iran_BA1_ShahrISokhta	Mbuti	0.223824	0.002328	96.144	387592
Guanzhuang	Iran_GanjDareh_Historic	Mbuti	0.223815	0.002739	81.709	281787
Guanzhuang	Lebanon_IA3.SG	Mbuti	0.223789	0.002281	98.112	551976
Guanzhuang	Lebanon_ERoman.SG	Mbuti	0.223784	0.00238	94.044	544943
Guanzhuang	Hungary_LateC_EBA_Baden_Yamnaya	Mbuti	0.223751	0.002542	88.025	341040
Guanzhuang	Switzerland_LN_1d.rel.Aes12.1d.rel.Aes3	Mbuti	0.223744	0.003089	72.423	193791
Guanzhuang	Spain_MBA_published	Mbuti	0.223713	0.003573	62.62	110100
Guanzhuang	Serbia_EN	Mbuti	0.223709	0.002426	92.202	443500
Guanzhuang	Austria_KremsWA3	Mbuti	0.223687	0.003874	57.746	74112
Guanzhuang	Spain_HG_published	Mbuti	0.223673	0.008139	27.48	11176
Guanzhuang	Jew_Iraqi.DG	Mbuti	0.223653	0.00234	95.565	535205
Guanzhuang	Switzerland_LN_father.or.son.Aes24.1d.rel.Aes19.1d.rel.Aes3	Mbuti	0.223652	0.00311	71.905	155189
Guanzhuang	Ukraine_N_father.or.son.I5875_published	Mbuti	0.22364	0.00687	32.553	18036
Guanzhuang	Spain_Hellenistic_oAegean	Mbuti	0.223624	0.003075	72.712	174742
Guanzhuang	Lithuania_EMN_Narva_o	Mbuti	0.223578	0.007445	30.029	15264
Guanzhuang	Spain_EN_1d.or.2d.rel.TOR.6.SG	Mbuti	0.223576	0.005764	38.788	26861
Guanzhuang	Poland_CordedWare_ProtoUnetice.SG	Mbuti	0.223556	0.004875	45.858	37612
Guanzhuang	Iran_TepeAbdulHosein_N.SG	Mbuti	0.223529	0.002402	93.069	485107
Guanzhuang	Bulgaria_C	Mbuti	0.223519	0.002376	94.083	461677
Guanzhuang	Italy_Sardinia_C_MonteClaro	Mbuti	0.223466	0.002412	92.641	401937
Guanzhuang	Turkey_Buyukkaya_EC	Mbuti	0.223454	0.002924	76.409	221691
Guanzhuang	Hungary_LateC_Protoboleraz	Mbuti	0.223439	0.00258	86.593	375426
Guanzhuang	Iran_GanjDareh_N_father.I1947_father.I1952	Mbuti	0.223407	0.003942	56.675	65471
Guanzhuang	Lithuania_LBA.SG	Mbuti	0.223403	0.009536	23.427	7456
Guanzhuang	Bulgaria_Varna_C	Mbuti	0.223383	0.003251	68.711	157878
Guanzhuang	Turkey_Catalhoyuk_N_Ceramic.SG	Mbuti	0.223368	0.002813	79.418	190680
Guanzhuang	Croatia_MN_Sopot	Mbuti	0.223366	0.002433	91.816	440458
Guanzhuang	Austria_N_LBK_published	Mbuti	0.223342	0.002403	92.948	448113
Guanzhuang	Russia_Steppe_Maikop_o	Mbuti	0.223332	0.00293	76.231	178614
Guanzhuang	Turkey_N_sister.I0736_published	Mbuti	0.223329	0.002865	77.951	275108
Guanzhuang	Spain_Visigoth_Girona_published	Mbuti	0.223313	0.009298	24.018	8860
Guanzhuang	Turkey_N_published	Mbuti	0.223264	0.002339	95.465	500127
Guanzhuang	Iran_HajjiFiruz_C	Mbuti	0.223261	0.002584	86.394	383964
Guanzhuang	Switzerland_LN_daughter.Aes17	Mbuti	0.223203	0.002981	74.869	184082
Guanzhuang	Spain_EN	Mbuti	0.223175	0.002379	93.818	476252
Guanzhuang	Turkmenistan_C_Parkhai	Mbuti	0.223118	0.00231	96.57	427866
Guanzhuang	Russia_LateMaikop_1d.rel.I11132.I11133	Mbuti	0.22309	0.002945	75.757	246825
Guanzhuang	Switzerland_LN_father.or.son.MX212.MX150	Mbuti	0.223089	0.003012	74.066	152056
Guanzhuang	Iran_C_SehGabi	Mbuti	0.22308	0.002307	96.697	455340
Guanzhuang	Turkey_EBA_II.SG	Mbuti	0.223037	0.002429	91.804	473082
Guanzhuang	Ireland_MN_contam.SG	Mbuti	0.223027	0.002592	86.06	535622
Guanzhuang	Italy_Imperial_o5.SG	Mbuti	0.223011	0.00256	87.122	437845
Guanzhuang	Lebanon_Hellenistic.SG	Mbuti	0.223001	0.002598	85.822	347722
Guanzhuang	Turkey_Kumtepe_N.SG	Mbuti	0.222982	0.004194	53.161	59562
Guanzhuang	Spain_Roman_oLocal	Mbuti	0.222918	0.002951	75.544	158046
Guanzhuang	Hungary_C_Balaton_Lasinja_published	Mbuti	0.222896	0.002765	80.603	334470
Guanzhuang	Italy_South_HG_Ostuni1	Mbuti	0.222881	0.003493	63.803	101650
Guanzhuang	WTL_LBA1	Mbuti	0.222849	0.008739	25.5	9791
Guanzhuang	Bulgaria_EBA_Yamnaya_o	Mbuti	0.222817	0.003633	61.329	94876
Guanzhuang	Italy_Sardinia_C_MonteClaro_published	Mbuti	0.222739	0.0028	79.558	301333
Guanzhuang	Russia_LateMaikop	Mbuti	0.222738	0.00283	78.712	261063
Guanzhuang	Lebanon_Medieval_o3.SG	Mbuti	0.22272	0.002986	74.589	172705
Guanzhuang	Switzerland_EBA_1	Mbuti	0.22271	0.002364	94.216	354583
Guanzhuang	Iran_Wezmeh_N.SG	Mbuti	0.222707	0.002679	83.141	527948
Guanzhuang	Bulgaria_EBA_published_contam	Mbuti	0.222657	0.003028	73.526	215853
Guanzhuang	Turkey_CamlibelTarlasi_LateC	Mbuti	0.222656	0.002349	94.794	498141
Guanzhuang	Turkey_Alalakh_MLBA_daughter.ALA001	Mbuti	0.222579	0.006163	36.116	20250
Guanzhuang	Iran_ShahrISokhta_BA2_published_contam	Mbuti	0.222386	0.007656	29.048	13244
Guanzhuang	Armenia_LBA.SG	Mbuti	0.222364	0.002759	80.601	207044
Guanzhuang	Bulgaria_MalakPreslavets_N	Mbuti	0.222346	0.003288	67.616	114118
Guanzhuang	Turkmenistan_C_TepeAnau	Mbuti	0.222334	0.002447	90.853	378736
Guanzhuang	Turkey_Ikiztepe	Mbuti	0.222316	0.005407	41.116	27138
Guanzhuang	Tajikistan_Ksirov_Kushan_1d.rel.I12292	Mbuti	0.222292	0.004379	50.759	47069
Guanzhuang	Ukraine_EBA_GlobularAmphora	Mbuti	0.222233	0.002624	84.683	363683
Guanzhuang	Spain_IA_Tartessian	Mbuti	0.222225	0.007116	31.23	15274
Guanzhuang	Italy_Imperial_o4.SG	Mbuti	0.222224	0.00235	94.583	542023
Guanzhuang	Turkey_Alalakh_MLBA	Mbuti	0.222223	0.002216	100.278	540419
Guanzhuang	Turkey_AsikliHoyuk_EN_Preceramic_sister.Ash136.SG	Mbuti	0.2222	0.009246	24.031	9209
Guanzhuang	Lebanon_Medieval.SG	Mbuti	0.222199	0.002436	91.197	527092
Guanzhuang	Sweden_IA.SG	Mbuti	0.222185	0.002966	74.9	184777
Guanzhuang	Bulgaria_EBA_o1	Mbuti	0.222168	0.002659	83.551	291368
Guanzhuang	Ukraine_Eneolithic_Trypillia	Mbuti	0.222123	0.003273	67.862	114585
Guanzhuang	Sweden_TRB_MN	Mbuti	0.222091	0.00325	68.337	116059
Guanzhuang	Bulgaria_N	Mbuti	0.222077	0.002659	83.517	305566
Guanzhuang	IBS_CanaryIslands.SG	Mbuti	0.222077	0.002469	89.961	538911
Guanzhuang	Jordan_LBA_IA	Mbuti	0.221995	0.002546	87.203	427152
Guanzhuang	Italy_Sardinia_EarlyMedieval_o	Mbuti	0.221993	0.002881	77.048	334613
Guanzhuang	Bulgaria_C_published	Mbuti	0.221952	0.009749	22.767	8604
Guanzhuang	Afghanistan_DarralKur_MBA	Mbuti	0.221904	0.00894	24.823	10041
Guanzhuang	Russia_MLBA_Sintashta_1d.rel.I1084	Mbuti	0.221877	0.006374	34.81	21640
Guanzhuang	Syria_Ebla_EMBA	Mbuti	0.221818	0.002268	97.806	475119
Guanzhuang	Sweden_BA.SG	Mbuti	0.221815	0.00552	40.182	31723
Guanzhuang	Italy_Sardinia_EarlyMedieval_o_1d.rel.COR002	Mbuti	0.221782	0.00286	77.554	290325
Guanzhuang	Romania_EN	Mbuti	0.221769	0.002537	87.428	323308
Guanzhuang	Iran_C_TepeHissar_published	Mbuti	0.2217	0.004434	49.997	57619
Guanzhuang	Turkey_Catalhoyuk_N_Ceramic_sister.cth728.SG	Mbuti	0.221674	0.007168	30.926	15592
Guanzhuang	Turkey_Arslantepe_LateC_brother.ART014	Mbuti	0.221673	0.002917	75.991	268124
Guanzhuang	Spain_Roman_oMixed	Mbuti	0.221631	0.002513	88.187	387955
Guanzhuang	Turkmenistan_C_Geoksyur_mother.or.daughter.I12486	Mbuti	0.221627	0.003773	58.742	73164
Guanzhuang	Jordan_LBA	Mbuti	0.22162	0.002209	100.348	541336
Guanzhuang	Croatia_N_Cardial	Mbuti	0.221597	0.002445	90.636	385167
Guanzhuang	Bulgaria_BeliBreyag_EBA	Mbuti	0.221547	0.00378	58.615	93719
Guanzhuang	Spain_EBA_Africa_published	Mbuti	0.221492	0.002954	74.991	153844
Guanzhuang	Israel_C_1d.rel.I1179_published	Mbuti	0.221439	0.005853	37.832	26942
Guanzhuang	Spain_NazariPeriod_Muslim_published	Mbuti	0.221353	0.006316	35.045	20351
Guanzhuang	Bulgaria_MalakPreslavets_N_oHighEEF	Mbuti	0.221323	0.0033	67.067	107659
Guanzhuang	Iran_LN_SehGabi	Mbuti	0.221289	0.002989	74.028	191037
Guanzhuang	Poland_Ksiaznice_GAC.SG_mother.or.daughter.RISE1249.SG	Mbuti	0.221274	0.003468	63.802	110670
Guanzhuang	Azerbaijan_Caucasus_lowlands_LateC	Mbuti	0.221233	0.003316	66.715	124739
Guanzhuang	Russia_Caucasus_KuraAraxes	Mbuti	0.221138	0.003245	68.146	132442
Guanzhuang	Montenegro_LBA.SG	Mbuti	0.221077	0.007919	27.916	11863
Guanzhuang	Turkey_Arslantepe_EBA	Mbuti	0.221071	0.002315	95.507	474158
Guanzhuang	Spain_Islamic	Mbuti	0.221063	0.002389	92.543	417038
Guanzhuang	Israel_MLBA_sibling.I3707	Mbuti	0.221058	0.002917	75.784	220110
Guanzhuang	Italy_Imperial_o1.SG	Mbuti	0.221055	0.002491	88.737	509651
Guanzhuang	Bulgaria_Varna_C_o2	Mbuti	0.221025	0.01027	21.521	7688
Guanzhuang	Iran_GanjDareh_N	Mbuti	0.220966	0.002349	94.054	472855
Guanzhuang	Turkey_CamlibelTarlasi_LateC_1d.rel.CBT016.CBT002	Mbuti	0.220901	0.002882	76.637	253028
Guanzhuang	Switzerland_LN_brother.MX211	Mbuti	0.220872	0.002984	74.008	160190
Guanzhuang	Switzerland_BellBeaker	Mbuti	0.220816	0.003681	59.985	76658
Guanzhuang	Armenia_EBA_KuraAraxes	Mbuti	0.220802	0.002573	85.805	316152
Guanzhuang	Spain_Islamic_Zira	Mbuti	0.220745	0.002378	92.824	406855
Guanzhuang	Samaritan.DG	Mbuti	0.22074	0.002551	86.541	518603
Guanzhuang	Turkmenistan_C_Geoksyur_contam	Mbuti	0.220738	0.005053	43.682	35095
Guanzhuang	Turkmenistan_Gonur_BA_1_o2	Mbuti	0.22072	0.006595	33.47	20020
Guanzhuang	Russia_Kostenki12	Mbuti	0.220698	0.005835	37.825	21336
Guanzhuang	Spain_C_brother.I1277	Mbuti	0.220672	0.004652	47.437	43498
Guanzhuang	IBS_o1.SG	Mbuti	0.220649	0.002337	94.414	537719
Guanzhuang	Ukraine_Chernyakhiv_o.SG	Mbuti	0.220619	0.009167	24.067	8326
Guanzhuang	Iran_GanjDareh_N_son.I1946_brother.I1947	Mbuti	0.2206	0.004183	52.735	68247
Guanzhuang	Ibiza_Punic.SG	Mbuti	0.220537	0.003205	68.801	152911
Guanzhuang	Iran_C_TepeHissar	Mbuti	0.220482	0.002271	97.088	419219
Guanzhuang	Austria_Krems1_2_twin.I2483	Mbuti	0.220466	0.003839	57.433	77457
Guanzhuang	Wales_IA_contam	Mbuti	0.220462	0.007662	28.773	11592
Guanzhuang	Ukraine_N_o2_published	Mbuti	0.2204	0.004195	52.539	61898
Guanzhuang	Turkey_Catalhoyuk_N_Ceramic.SG_lc	Mbuti	0.22037	0.00986	22.35	6914
Guanzhuang	Druze.DG	Mbuti	0.220361	0.002305	95.588	535349
Guanzhuang	Azerbaijan_Caucasus_lowlands_LN	Mbuti	0.220335	0.002517	87.522	372313
Guanzhuang	PUR.SG	Mbuti	0.220293	0.002138	103.043	613088
Guanzhuang	Italy_IA_Republic_oEasternMediterranean_o.SG	Mbuti	0.220171	0.002805	78.48	394924
Guanzhuang	Iran_HajjiFiruz_C_o	Mbuti	0.220149	0.002597	84.761	372396
Guanzhuang	Bulgaria_N_published	Mbuti	0.220124	0.002507	87.797	324676
Guanzhuang	Sweden_BattleAxe.SG	Mbuti	0.220117	0.002895	76.039	198739
Guanzhuang	Austria_Krems1_2_twin.I2483_all	Mbuti	0.220112	0.003553	61.952	103535
Guanzhuang	Israel_MLBA_brother.I10770	Mbuti	0.220055	0.002929	75.13	239407
Guanzhuang	Russia_Caucasus_Eneolithic	Mbuti	0.220019	0.002714	81.06	248714
Guanzhuang	Iran_ShahrISokhta_BA3	Mbuti	0.220003	0.006596	33.353	18866
Guanzhuang	Turkey_CamlibelTarlasi_LateC_1d.rel.CBT016.CBT017	Mbuti	0.219979	0.003469	63.41	97924
Guanzhuang	Turkey_TellKurdu_EC	Mbuti	0.219774	0.00269	81.714	247995
Guanzhuang	Turkey_AsikliHoyuk_EN_Preceramic_lc.SG	Mbuti	0.219666	0.009862	22.274	7348
Guanzhuang	Armenia_Caucasus_KuraAraxes_dup.ARM002	Mbuti	0.219425	0.002836	77.37	243049
Guanzhuang	Spain_Roman	Mbuti	0.219324	0.002334	93.959	415118
Guanzhuang	Macedonia_N	Mbuti	0.219186	0.002724	80.476	325052
Guanzhuang	Israel_IA_o	Mbuti	0.219067	0.003052	71.787	184225
Guanzhuang	Bulgaria_Krepost_N	Mbuti	0.219041	0.004042	54.194	60258
Guanzhuang	Spain_Roman_brother.I3983	Mbuti	0.219024	0.003865	56.669	84292
Guanzhuang	Spain_Visigoth_Granada	Mbuti	0.218996	0.002336	93.73	394008
Guanzhuang	Israel_MLBA	Mbuti	0.218742	0.002265	96.58	463838
Guanzhuang	Croatia_N_Lasinja	Mbuti	0.218545	0.002905	75.22	229413
Guanzhuang	Israel_MLBA_lc	Mbuti	0.218528	0.005359	40.774	26752
Guanzhuang	Spain_Islamic_Almohade	Mbuti	0.218476	0.003014	72.491	189877
Guanzhuang	Turkey_Ikiztepe_LateC	Mbuti	0.21836	0.002671	81.749	229195
Guanzhuang	Israel_Ashkelon_IA2	Mbuti	0.218353	0.002883	75.748	186679
Guanzhuang	Lebanon_IA3_o2.SG	Mbuti	0.218294	0.00259	84.273	426640
Guanzhuang	Israel_C	Mbuti	0.218132	0.002257	96.628	481752
Guanzhuang	Lebanon_Medieval_o1.SG	Mbuti	0.217524	0.002698	80.633	480147
Guanzhuang	Spain_NazariPeriod_Muslim	Mbuti	0.217479	0.002398	90.673	365573
Guanzhuang	Turkey_TellKurdu_EMC	Mbuti	0.217414	0.003793	57.319	64508
Guanzhuang	Bulgaria_MalakPreslavets_N_published	Mbuti	0.217159	0.004997	43.458	36526
Guanzhuang	Spain_C_contam	Mbuti	0.217055	0.007753	27.995	12305
Guanzhuang	Israel_MLBA_son.I8187	Mbuti	0.21704	0.004092	53.039	64743
Guanzhuang	Israel_PPNB	Mbuti	0.216858	0.002806	77.278	269880
Guanzhuang	Russia_Caucasus_Eneolithic_sibling.I2056_sibling.I1722	Mbuti	0.216791	0.004548	47.666	47425
Guanzhuang	Switzerland_EBA_2_contam	Mbuti	0.21678	0.005257	41.237	32584
Guanzhuang	Palestinian.DG	Mbuti	0.216382	0.002341	92.43	543749
Guanzhuang	Israel_Ashkelon_LBA	Mbuti	0.216344	0.003	72.11	145664
Guanzhuang	Israel_IBA	Mbuti	0.216276	0.003173	68.161	154709
Guanzhuang	BedouinB.DG	Mbuti	0.21625	0.002267	95.397	532979
Guanzhuang	Bulgaria_EBA_Ezero	Mbuti	0.216248	0.007502	28.824	16398
Guanzhuang	Jordanian.DG	Mbuti	0.216191	0.002276	94.999	543340
Guanzhuang	Israel_MLBA_sister.I10101_published	Mbuti	0.215955	0.007488	28.842	14503
Guanzhuang	Romania_Muierii	Mbuti	0.215941	0.005737	37.642	23936
Guanzhuang	Jordan_EBA	Mbuti	0.215923	0.002372	91.025	343787
Guanzhuang	Jew_Yemenite.DG	Mbuti	0.215798	0.002309	93.453	534287
Guanzhuang	Egypt_ThirdIntermediatePeriod	Mbuti	0.215738	0.002866	75.278	205174
Guanzhuang	Israel_C_published	Mbuti	0.215709	0.003711	58.121	80172
Guanzhuang	Egypt_Ptolemaic_contam	Mbuti	0.215576	0.004064	53.04	63618
Guanzhuang	Lebanon_IA3_o1_1d.rel.SFI-44.SG	Mbuti	0.215086	0.002969	72.446	215613
Guanzhuang	England_IA_Roman_oMiddleEast.SG	Mbuti	0.214849	0.002641	81.345	369801
Guanzhuang	Iran_BA1_ShahrISokhta_1d.rel.I11483	Mbuti	0.214816	0.007872	27.287	13603
Guanzhuang	Turkmenistan_C_Geoksyur_published	Mbuti	0.214577	0.004981	43.076	33942
Guanzhuang	Israel_C_father.or.son.I1169	Mbuti	0.214536	0.003225	66.522	163659
Guanzhuang	Denmark_LBA.SG	Mbuti	0.214365	0.006516	32.9	18548
Guanzhuang	Italy_Imperial_oAfrica.SG	Mbuti	0.21417	0.002731	78.419	430669
Guanzhuang	Spain_Visigoth_Granada_published	Mbuti	0.214025	0.005424	39.456	32646
Guanzhuang	Israel_Ashkelon_IA1	Mbuti	0.214012	0.003482	61.467	94963
Guanzhuang	Israel_MLBA_brother.I10359	Mbuti	0.213959	0.009156	23.369	9200
Guanzhuang	Russia_Caucasus_Eneolithic_sibling.I2055_sibling.I2056	Mbuti	0.213575	0.004524	47.214	44166
Guanzhuang	Turkey_TitrisHoyuk_EBA	Mbuti	0.213521	0.004633	46.084	40875
Guanzhuang	Jordan_Late_PPNB	Mbuti	0.213391	0.00314	67.949	154996
Guanzhuang	Spain_NazariPeriod_LateMuslim	Mbuti	0.213286	0.003294	64.748	97986
Guanzhuang	Jordan_PPNB	Mbuti	0.212995	0.003844	55.408	75233
Guanzhuang	Russia_Caucasus_KuraAraxes_o2_1d.rel.VEK007_1d.rel.VEK008	Mbuti	0.212745	0.004978	42.735	32576
Guanzhuang	Spain_EN_father.or.son.I0410	Mbuti	0.211985	0.005814	36.462	21431
Guanzhuang	Israel_C_o2_published	Mbuti	0.211721	0.010383	20.391	6966
Guanzhuang	Kazakhstan_LBA_Tasbas	Mbuti	0.211341	0.010209	20.701	7110
Guanzhuang	Israel_IA	Mbuti	0.210686	0.003268	64.479	126124
Guanzhuang	Jordan_PPNC	Mbuti	0.210529	0.003552	59.266	101692
Guanzhuang	Spain_Roman_published	Mbuti	0.210257	0.005631	37.34	26048
Guanzhuang	Romania_Oase	Mbuti	0.210096	0.004277	49.117	62713
Guanzhuang	Jordan_PPNB_contam	Mbuti	0.209709	0.004014	52.249	60768
Guanzhuang	Morocco_LN.SG	Mbuti	0.209451	0.002948	71.05	156605
Guanzhuang	Israel_Natufian_published_contam	Mbuti	0.20928	0.003188	65.651	162888
Guanzhuang	Spain_EN_o.SG	Mbuti	0.208831	0.006135	34.037	19270
Guanzhuang	Israel_MLBA_o_brother.I2200_published	Mbuti	0.208349	0.005527	37.695	28228
Guanzhuang	Iran_Mesolithic_HotuIIIb	Mbuti	0.207941	0.008223	25.288	11287
Guanzhuang	Israel_Middle_Late_PPNB	Mbuti	0.207858	0.004746	43.799	39863
Guanzhuang	Russia_Caucasus_LBA_Dolmen	Mbuti	0.207446	0.006935	29.915	16164
Guanzhuang	Jordan_PPNB_published	Mbuti	0.206722	0.00413	50.058	55041
Guanzhuang	Jordan_PPNC_published	Mbuti	0.206195	0.007037	29.301	15053
Guanzhuang	Israel_Natufian_published	Mbuti	0.20602	0.003929	52.435	67258
Guanzhuang	Israel_Natufian_contam_published	Mbuti	0.20229	0.007112	28.445	13206
Guanzhuang	CanaryIslands_Guanche.SG	Mbuti	0.199907	0.002236	89.41	537099
Guanzhuang	Spain_BellBeaker_oAfrica_published	Mbuti	0.198201	0.002849	69.556	266562
Guanzhuang	Turkey_AsikliHoyuk_EN_Preceramic_o.SG	Mbuti	0.19702	0.008705	22.633	14746
Guanzhuang	ASW_oNativeAmerican.SG	Mbuti	0.195878	0.002109	92.893	552433
Guanzhuang	Saharawi.DG	Mbuti	0.192129	0.002186	87.902	533790
Guanzhuang	Mozabite.DG	Mbuti	0.188786	0.002281	82.768	533136
Guanzhuang	PEL_oHighAfrican.SG	Mbuti	0.188777	0.002966	63.649	525032
Guanzhuang	Italy_Sardinia_C_oAfrica	Mbuti	0.188225	0.00299	62.952	174797
Guanzhuang	Href.REF	Mbuti	0.183804	0.003165	58.076	531259
Guanzhuang	Morocco_Iberomaurusian	Mbuti	0.180492	0.002131	84.706	506511
Guanzhuang	Morocco_EN.SG	Mbuti	0.179407	0.002568	69.856	309956
Guanzhuang	Morocco_Iberomaurusian_sibling.TAF011	Mbuti	0.175351	0.002968	59.079	134105
Guanzhuang	Spain_Islamic_oAfrica_published	Mbuti	0.172874	0.00542	31.893	27406
Guanzhuang	Tanzania_PN_contam	Mbuti	0.169366	0.00717	23.621	13173
Guanzhuang	Agaw.DG	Mbuti	0.162349	0.002036	79.73	531029
Guanzhuang	ACB_o1.SG	Mbuti	0.161458	0.002716	59.442	520868
Guanzhuang	Spain_NazariPeriod_Muslim_African	Mbuti	0.159985	0.005082	31.48	31644
Guanzhuang	ASW_oEuropean.SG	Mbuti	0.159346	0.002233	71.355	507868
Guanzhuang	PUR_oAfrica.SG	Mbuti	0.155568	0.001927	80.739	547831
Guanzhuang	Amhara.DG	Mbuti	0.154554	0.001974	78.284	530234
Guanzhuang	Tanzania_PN_IA_o	Mbuti	0.147479	0.002453	60.113	312174
Guanzhuang	Tanzania_PN	Mbuti	0.146945	0.001914	76.781	395361
Guanzhuang	Somali.DG	Mbuti	0.145593	0.002257	64.517	515502
Guanzhuang	Tanzania_Luxmanda_3000BP	Mbuti	0.141274	0.00257	54.977	322435
Guanzhuang	Tanzania_Luxmanda_3000BP_all	Mbuti	0.141252	0.002509	56.296	338543
Guanzhuang	Rendille.DG	Mbuti	0.140847	0.00189	74.521	528315
Guanzhuang	Iraqw.DG	Mbuti	0.133816	0.001879	71.224	527886
Guanzhuang	Hadza_2.DG	Mbuti	0.130976	0.00214	61.199	515405
Guanzhuang	Fulani.DG	Mbuti	0.13003	0.001947	66.776	527691
Guanzhuang	Congo_Kindoki_Protohistoric_o	Mbuti	0.123209	0.008946	13.773	6676
Guanzhuang	Elmolo.DG	Mbuti	0.121331	0.001689	71.823	527209
Guanzhuang	ACB_o2.SG	Mbuti	0.119279	0.001918	62.199	532281
Guanzhuang	Aari.DG	Mbuti	0.118741	0.001707	69.572	525344
Guanzhuang	Ogiek.DG	Mbuti	0.117797	0.001754	67.173	525162
Guanzhuang	Congo_MatangaiTuru_IA	Mbuti	0.117005	0.005945	19.683	16175
Guanzhuang	Masai.DG	Mbuti	0.116948	0.001763	66.326	525600
Guanzhuang	ASW.SG	Mbuti	0.113708	0.001356	83.861	612064
Guanzhuang	Sengwer.DG	Mbuti	0.109852	0.001661	66.12	524357
Guanzhuang	Sandawe.DG	Mbuti	0.107501	0.001983	54.205	514064
Guanzhuang	Kikuyu.DG	Mbuti	0.105562	0.001727	61.132	525499
Guanzhuang	Bulala.DG	Mbuti	0.103319	0.001677	61.603	524617
Guanzhuang	Mursi.DG	Mbuti	0.099977	0.001558	64.154	522777
Guanzhuang	ACB.SG	Mbuti	0.098916	0.001287	76.87	615132
Guanzhuang	Ethiopia_4500BP_published.SG	Mbuti	0.096799	0.001786	54.19	523141
Guanzhuang	GWD_oEuropean.SG	Mbuti	0.094857	0.001949	48.66	523008
Guanzhuang	Tanzania_Pemba_1400BP_published_all	Mbuti	0.093795	0.003962	23.677	44173
Guanzhuang	Dinka.DG	Mbuti	0.091516	0.001449	63.169	549017
Guanzhuang	Mada.DG	Mbuti	0.090084	0.001494	60.311	522802
Guanzhuang	Tanzania_PN_IA	Mbuti	0.087357	0.00929	9.404	6247
Guanzhuang	LWK.SG	Mbuti	0.087082	0.001226	71.026	604841
Guanzhuang	GWD.SG	Mbuti	0.086821	0.001244	69.789	602491
Guanzhuang	Tanzania_Pemba_1400BP_published	Mbuti	0.086665	0.00487	17.797	28146
Guanzhuang	YRI_o.SG	Mbuti	0.085463	0.001375	62.141	549111
Guanzhuang	Gambian.DG	Mbuti	0.085364	0.001522	56.096	524084
Guanzhuang	Luo.DG	Mbuti	0.084932	0.001525	55.705	522775
Guanzhuang	Mandenka.DG	Mbuti	0.084641	0.001395	60.661	552833
Guanzhuang	BantuKenya.DG	Mbuti	0.084623	0.00152	55.663	522840
Guanzhuang	YRI.SG	Mbuti	0.083757	0.001258	66.586	597806
Guanzhuang	Luhya.DG	Mbuti	0.083613	0.001543	54.206	522934
Guanzhuang	YRI_relative.SG	Mbuti	0.082839	0.001817	45.58	518540
Guanzhuang	Kaba.DG	Mbuti	0.082663	0.001427	57.916	522773
Guanzhuang	ESN.SG	Mbuti	0.082182	0.001236	66.473	596627
Guanzhuang	Tanzania_Pemba_600BP_published	Mbuti	0.081894	0.002142	38.226	243588
Guanzhuang	Uganda_Munsa_LIA	Mbuti	0.081216	0.002418	33.593	128195
Guanzhuang	Esan.DG	Mbuti	0.081149	0.00147	55.195	523255
Guanzhuang	Laka.DG	Mbuti	0.08096	0.001476	54.858	523167
Guanzhuang	MSL.SG	Mbuti	0.080817	0.001215	66.522	596580
Guanzhuang	Tanzania_Zanzibar_1300BP_all	Mbuti	0.080713	0.001982	40.725	275464
Guanzhuang	Igbo.DG	Mbuti	0.080291	0.001449	55.429	523266
Guanzhuang	Yoruba.DG	Mbuti	0.080051	0.001334	59.989	530875
Guanzhuang	Lemande.DG	Mbuti	0.080041	0.00146	54.806	522798
Guanzhuang	Mende.DG	Mbuti	0.07934	0.001391	57.026	523234
Guanzhuang	Tanzania_Zanzibar_1300BP	Mbuti	0.078338	0.002409	32.518	129146
Guanzhuang	Botswana_Taukome_EIA	Mbuti	0.07795	0.004762	16.369	26126
Guanzhuang	Tikar_South.DG	Mbuti	0.077083	0.001467	52.557	523148
Guanzhuang	Ngumba.DG	Mbuti	0.076475	0.001415	54.065	522442
Guanzhuang	BantuHerero.DG	Mbuti	0.07636	0.001436	53.162	522843
Guanzhuang	Kongo.DG	Mbuti	0.076247	0.001653	46.123	511774
Guanzhuang	South_Africa_400BP.SG	Mbuti	0.076088	0.001437	52.963	535904
Guanzhuang	Congo_NgongoMbata_Protohistoric	Mbuti	0.074848	0.002511	29.814	110684
Guanzhuang	Congo_Kindoki_Protohistoric	Mbuti	0.074798	0.001743	42.91	261705
Guanzhuang	South_Africa_1200BP.SG	Mbuti	0.074558	0.002233	33.382	287841
Guanzhuang	Botswana_Xaro_EIA	Mbuti	0.074413	0.001587	46.901	401718
Guanzhuang	Tanzania_PN_IA_published	Mbuti	0.070484	0.005804	12.143	13855
Guanzhuang	BantuTswana.DG	Mbuti	0.069301	0.00138	50.206	523653
Guanzhuang	Tanzania_Zanzibar_1300BP.SG	Mbuti	0.068777	0.008794	7.821	6137
Guanzhuang	Cameroon_SMA.DG.SG	Mbuti	0.059366	0.001617	36.722	507290
Guanzhuang	Cameroon_SMA.DG	Mbuti	0.05874	0.001499	39.188	521109
Guanzhuang	Cameroon_SMA_published	Mbuti	0.057927	0.001246	46.508	479686
Guanzhuang	Cameroon_SMA.SG	Mbuti	0.057531	0.001366	42.106	525984
Guanzhuang	Bedzan.DG	Mbuti	0.053498	0.001274	41.989	519742
Guanzhuang	Baka.DG	Mbuti	0.052856	0.001283	41.182	519068
Guanzhuang	Biaka.DG	Mbuti	0.04843	0.001253	38.642	519415
Guanzhuang	Bakola.DG	Mbuti	0.048359	0.001283	37.684	519297
Guanzhuang	Khomani_San.DG	Mbuti	0.040246	0.001326	30.344	522879
Guanzhuang	DenisovaNeanderthalMix.SG	Mbuti	0.037298	0.001609	23.183	450504
Guanzhuang	Vindija_Neanderthal.DG	Mbuti	0.036775	0.001703	21.599	481338
Guanzhuang	Chagyrskaya_Neanderthal.SG	Mbuti	0.036262	0.001699	21.348	481136
Guanzhuang	Altai_Neanderthal_published.DG	Mbuti	0.035611	0.001684	21.144	528100
Guanzhuang	Altai_Neanderthal.DG	Mbuti	0.035594	0.0017	20.94	480852
Guanzhuang	South_Africa_2000BP.SG	Mbuti	0.033636	0.001522	22.102	321065
Guanzhuang	South_Africa_2200BP.SG	Mbuti	0.033209	0.001601	20.745	330159
Guanzhuang	Gorilla.REF	Mbuti	0.032836	0.001351	24.304	484798
Guanzhuang	Ancestor.REF	Mbuti	0.032176	0.001339	24.029	519508
Guanzhuang	South_Africa_1900BP.SG	Mbuti	0.031795	0.001231	25.835	528793
Guanzhuang	Denisova.DG	Mbuti	0.029193	0.001512	19.305	479373

## Sheet: E
Table S1E. f4-statistics in the form of f4(Mbuti, YR-related groups, Guanzhuang, ancient East Eurasians) indicating that there is a close relationship between the Guanzhuang population and ancient YR-related ancestry. Values with |Z|>3 indicate significant results, highlighted in the data by blue (positive) and red (negative) ; values with 2<|Z|<3 are filled with light blue (positive) and orange …
f4(Mbuti, YR-related; Guanzhuang, ancient East Eurasians)
pop1	pop2	pop3	pop4	f4	std.err	Z	ABAB	ABBA	SNPs
Mbuti	China_YR_LN	Guanzhuang	Russia_Afanasievo	-0.1628	0.002799	-58.157	31342	43529	631000
Mbuti	China_YR_LN	Guanzhuang	Russia_Srubnaya	-0.1677	0.002933	-57.183	31194	43768	631064
Mbuti	China_Upper_YR_LN	Guanzhuang	Russia_Afanasievo	-0.1639	0.002938	-55.79	31054	43230	625266
Mbuti	China_Upper_YR_LN	Guanzhuang	Russia_Srubnaya	-0.1675	0.003025	-55.368	30955	43408	625254
Mbuti	China_YR_MN	Guanzhuang	Russia_Afanasievo	-0.1627	0.003051	-53.312	31121	43212	626833
Mbuti	China_YR_MN	Guanzhuang	Russia_Srubnaya	-0.1675	0.003183	-52.629	30973	43437	626858
Mbuti	China_Upper_YR_IA	Guanzhuang	Russia_Afanasievo	-0.1621	0.003101	-52.253	29786	41307	600040
Mbuti	China_Upper_YR_IA	Guanzhuang	Russia_Srubnaya	-0.1636	0.003198	-51.155	29795	41450	600319
Mbuti	China_Shimao_LN	Guanzhuang	Russia_Srubnaya	-0.1688	0.003342	-50.505	30727	43208	622428
Mbuti	China_Shimao_LN	Guanzhuang	Russia_Afanasievo	-0.1631	0.003256	-50.11	30941	43005	622408
Mbuti	China_YR_LN	Guanzhuang	Mongolia_EBA_Chemurchek_2	-0.1443	0.003412	-42.283	22844	30545	462377
Mbuti	China_YR_LBIA	Guanzhuang	Russia_Srubnaya	-0.1622	0.003986	-40.68	22422	31101	456292
Mbuti	China_YR_LBIA	Guanzhuang	Russia_Afanasievo	-0.1567	0.003859	-40.596	22560	30942	456281
Mbuti	China_YR_MN	Guanzhuang	Mongolia_EBA_Chemurchek_2	-0.1427	0.003782	-37.724	22823	30418	460340
Mbuti	China_Upper_YR_LN	Guanzhuang	Mongolia_EBA_Chemurchek_2	-0.1399	0.003718	-37.632	22834	30263	458666
Mbuti	China_Upper_YR_IA	Guanzhuang	Mongolia_EBA_Chemurchek_2	-0.1385	0.003774	-36.692	22206	29345	445246
Mbuti	China_Shimao_LN	Guanzhuang	Mongolia_EBA_Chemurchek_2	-0.1413	0.003932	-35.946	22699	30171	457497
Mbuti	China_Miaozigou_MN	Guanzhuang	Russia_Afanasievo	-0.1645	0.004845	-33.959	8690	12113	176824
Mbuti	China_Miaozigou_MN	Guanzhuang	Russia_Srubnaya	-0.1673	0.00497	-33.66	8676	12162	176842
Mbuti	China_YR_LN	Guanzhuang	Laos_Hoabinhian.SG	-0.1277	0.004462	-28.609	13871	17931	283660
Mbuti	China_YR_LBIA	Guanzhuang	Mongolia_EBA_Chemurchek_2	-0.1337	0.004902	-27.282	17624	23067	356025
Mbuti	China_YR_MN	Guanzhuang	Laos_Hoabinhian.SG	-0.1255	0.004662	-26.916	13813	17778	282212
Mbuti	China_Upper_YR_LN	Guanzhuang	Laos_Hoabinhian.SG	-0.1235	0.004646	-26.588	13852	17756	281550
Mbuti	China_Upper_YR_IA	Guanzhuang	Laos_Hoabinhian.SG	-0.1247	0.004919	-25.341	13122	16859	268077
Mbuti	China_Shimao_LN	Guanzhuang	Laos_Hoabinhian.SG	-0.1257	0.005222	-24.067	13712	17654	280125
Mbuti	China_Miaozigou_MN	Guanzhuang	Mongolia_EBA_Chemurchek_2	-0.15	0.006318	-23.747	6790	9187	138163
Mbuti	China_YR_LN	Guanzhuang	Mongolia_LBA_CenterWest_4	-0.0512	0.002351	-21.795	30525	33822	592491
Mbuti	China_YR_LN	Guanzhuang	Malaysia_Hoabinhian.WGC	-0.1362	0.00666	-20.446	3319	4365	69718
Mbuti	China_YR_MN	Guanzhuang	Mongolia_LBA_CenterWest_4	-0.0523	0.002655	-19.701	30306	33651	588967
Mbuti	China_YR_LN	Guanzhuang	Japan_HG_Jomon	-0.065	0.003361	-19.347	23723	27023	466715
Mbuti	China_Upper_YR_LN	Guanzhuang	Japan_HG_Jomon	-0.0664	0.003656	-18.152	23541	26887	462981
Mbuti	China_YR_LN	Guanzhuang	Japan_Jomon.SG	-0.065	0.003614	-17.988	26272	29924	514800
Mbuti	China_YR_MN	Guanzhuang	Japan_HG_Jomon	-0.0637	0.003552	-17.933	23676	26898	464648
Mbuti	China_Upper_YR_IA	Guanzhuang	Mongolia_LBA_CenterWest_4	-0.0504	0.002819	-17.895	29163	32262	566114
Mbuti	China_Upper_YR_LN	Guanzhuang	Mongolia_LBA_CenterWest_4	-0.0472	0.00264	-17.864	30462	33478	587201
Mbuti	China_YR_LBIA	Guanzhuang	Laos_Hoabinhian.SG	-0.1148	0.006464	-17.761	10036	12639	205081
Mbuti	China_Upper_YR_LN	Guanzhuang	Malaysia_Hoabinhian.WGC	-0.1297	0.007349	-17.652	3339	4334	69210
Mbuti	China_YR_LN	Guanzhuang	Baojianshan	-0.0672	0.003866	-17.385	19342	22129	385030
Mbuti	China_Upper_YR_LN	Guanzhuang	Baojianshan	-0.0716	0.004136	-17.304	19148	22099	382120
Mbuti	China_Upper_YR_IA	Guanzhuang	Malaysia_Hoabinhian.WGC	-0.1364	0.008024	-16.995	3117	4101	65726
Mbuti	China_Shimao_LN	Guanzhuang	Mongolia_LBA_CenterWest_4	-0.0496	0.002961	-16.766	30244	33404	584989
Mbuti	China_YR_MN	Guanzhuang	Japan_Jomon.SG	-0.0666	0.004029	-16.52	26027	29739	511668
Mbuti	China_YR_MN	Guanzhuang	Baojianshan	-0.0692	0.00421	-16.447	19243	22105	383514
Mbuti	China_Upper_YR_IA	Guanzhuang	Baojianshan	-0.0706	0.004303	-16.418	18588	21414	371163
Mbuti	China_YR_MN	Guanzhuang	Malaysia_Hoabinhian.WGC	-0.129	0.00788	-16.366	3337	4325	69360
Mbuti	China_Shimao_LN	Guanzhuang	Malaysia_Hoabinhian.WGC	-0.1331	0.008137	-16.361	3321	4342	68842
Mbuti	China_Shimao_LN	Guanzhuang	Japan_HG_Jomon	-0.0673	0.004154	-16.201	23474	26861	461879
Mbuti	China_Shimao_LN	Guanzhuang	Baojianshan	-0.0736	0.004548	-16.183	19028	22051	381267
Mbuti	China_Miaozigou_MN	Guanzhuang	Laos_Hoabinhian.SG	-0.1428	0.0089	-16.047	3766	5021	79380
Mbuti	China_Upper_YR_LN	Guanzhuang	Japan_Jomon.SG	-0.0639	0.003997	-15.988	26066	29624	510577
Mbuti	China_Upper_YR_IA	Guanzhuang	Japan_HG_Jomon	-0.0632	0.004002	-15.795	22880	25968	449592
Mbuti	China_Shimao_LN	Guanzhuang	Japan_Jomon.SG	-0.0673	0.004428	-15.204	25849	29581	508019
Mbuti	China_Upper_YR_LN	Guanzhuang	Malaysia_LN.SG	-0.0582	0.003859	-15.086	25951	29160	515650
Mbuti	China_YR_LN	Guanzhuang	Russia_Shamanka_Eneolithic.SG	-0.0327	0.002173	-15.028	33955	36247	655184
Mbuti	China_Upper_YR_IA	Guanzhuang	Japan_Jomon.SG	-0.0601	0.004216	-14.261	24987	28183	487948
Mbuti	China_Shimao_LN	Guanzhuang	Malaysia_LN.SG	-0.0559	0.004113	-13.601	25809	28867	513064
Mbuti	China_Upper_YR_LN	Guanzhuang	Dushan	-0.0611	0.004605	-13.273	12627	14271	255822
Mbuti	China_YR_LN	Guanzhuang	Malaysia_LN.SG	-0.0485	0.003665	-13.223	26425	29117	519887
Mbuti	China_Upper_YR_IA	Guanzhuang	Malaysia_LN.SG	-0.0514	0.003894	-13.189	24823	27511	492584
Mbuti	China_Upper_YR_LN	Guanzhuang	Laos_BA.WGC	-0.0664	0.00525	-12.64	10220	11673	203452
Mbuti	China_YR_MN	Guanzhuang	Malaysia_LN.SG	-0.0513	0.004072	-12.595	26120	28944	516703
Mbuti	China_YR_LN	Guanzhuang	Laos_LN_BA.SG	-0.0449	0.003574	-12.575	24986	27338	484727
Mbuti	China_Upper_YR_LN	Guanzhuang	Qihe3	-0.0522	0.004183	-12.489	15708	17440	314226
Mbuti	China_YR_LN	Guanzhuang	Qihe3	-0.0481	0.003872	-12.419	15936	17546	316680
Mbuti	China_Shimao_LN	Guanzhuang	Qihe3	-0.0565	0.00456	-12.389	15569	17433	313492
Mbuti	China_Shimao_LN	Guanzhuang	Longlin	-0.096	0.007822	-12.278	3890	4717	80022
Mbuti	China_YR_LN	Guanzhuang	Longlin	-0.0818	0.006684	-12.245	4008	4722	80643
Mbuti	China_Upper_YR_LN	Guanzhuang	Laos_LN_BA.SG	-0.0497	0.004072	-12.2	24652	27229	480719
Mbuti	China_YR_LN	Guanzhuang	Dushan	-0.0525	0.004358	-12.04	12831	14252	257678
Mbuti	China_YR_MN	Guanzhuang	Russia_Shamanka_Eneolithic.SG	-0.0305	0.00254	-12.004	33753	35876	650626
Mbuti	China_Upper_YR_LN	Guanzhuang	Thailand_IA.SG	-0.045	0.003758	-11.982	17141	18758	342351
Mbuti	China_Upper_YR_IA	Guanzhuang	Longlin	-0.0896	0.007508	-11.938	3852	4610	78476
Mbuti	China_YR_LN	Guanzhuang	Laos_BA.WGC	-0.0564	0.004775	-11.808	10421	11667	205131
Mbuti	China_YR_LBIA	Guanzhuang	Mongolia_LBA_CenterWest_4	-0.0409	0.003464	-11.801	22533	24453	436931
Mbuti	China_YR_LBIA	Guanzhuang	Malaysia_Hoabinhian.WGC	-0.1247	0.010575	-11.792	2404	3089	50430
Mbuti	China_Upper_YR_LN	Guanzhuang	Longlin	-0.0868	0.007375	-11.765	3933	4681	80084
Mbuti	China_YR_MN	Guanzhuang	Longlin	-0.0878	0.007506	-11.698	3967	4730	80398
Mbuti	China_YR_MN	Guanzhuang	Dushan	-0.0541	0.004676	-11.565	12777	14237	256803
Mbuti	China_YR_LN	Guanzhuang	Thailand_IA.SG	-0.0387	0.003361	-11.51	17399	18800	345090
Mbuti	China_Upper_YR_IA	Guanzhuang	Russia_Shamanka_Eneolithic.SG	-0.0292	0.002541	-11.498	32215	34154	620414
Mbuti	China_Upper_YR_IA	Guanzhuang	Laos_LN_BA.SG	-0.0486	0.004331	-11.227	23449	25846	459034
Mbuti	China_YR_LBIA	Guanzhuang	Japan_HG_Jomon	-0.0572	0.005114	-11.182	18356	20583	359858
Mbuti	China_YR_LBIA	Guanzhuang	Baojianshan	-0.0635	0.005728	-11.078	15002	17035	300117
Mbuti	China_Upper_YR_LN	Guanzhuang	Taiwan_Hanben_IA	-0.0255	0.002306	-11.037	33117	34847	639999
Mbuti	China_Upper_YR_IA	Guanzhuang	Laos_BA.WGC	-0.0612	0.00556	-11.007	9729	10998	193209
Mbuti	China_Upper_YR_LN	Guanzhuang	Xitoucun	-0.0455	0.004166	-10.92	12276	13446	249230
Mbuti	China_YR_MN	Guanzhuang	Thailand_IA.SG	-0.0422	0.003877	-10.889	17180	18695	343068
Mbuti	China_Shimao_LN	Guanzhuang	Dushan	-0.057	0.005257	-10.837	12634	14160	255530
Mbuti	China_YR_MN	Guanzhuang	Laos_BA.WGC	-0.0594	0.005485	-10.828	10295	11595	203698
Mbuti	China_Upper_YR_IA	Guanzhuang	Qihe3	-0.05	0.004639	-10.781	15239	16844	304788
Mbuti	China_Upper_YR_LN	Guanzhuang	Vietnam_BA_DongSonCulture.SG	-0.0457	0.004279	-10.689	10644	11665	222521
Mbuti	China_Shimao_LN	Guanzhuang	Laos_LN_BA.SG	-0.0476	0.004471	-10.657	24590	27050	478162
Mbuti	China_YR_LBIA	Guanzhuang	Japan_Jomon.SG	-0.0596	0.005608	-10.623	18824	21209	370874
Mbuti	China_YR_MN	Guanzhuang	Laos_LN_BA.SG	-0.0447	0.004214	-10.597	24837	27159	481627
Mbuti	China_Upper_YR_LN	Guanzhuang	Liangdao2	-0.0422	0.004001	-10.546	22336	24304	442912
Mbuti	China_Upper_YR_IA	Guanzhuang	Dushan	-0.0516	0.004903	-10.517	12441	13793	249271
Mbuti	China_YR_MN	Guanzhuang	Qihe3	-0.046	0.004416	-10.414	15878	17409	315414
Mbuti	China_Upper_YR_LN	Guanzhuang	Vietnam_LN.SG	-0.0463	0.004473	-10.354	10521	11543	211653
Mbuti	China_Upper_YR_LN	Guanzhuang	Vietnam_N	-0.0598	0.005794	-10.322	5196	5857	103335
Mbuti	China_YR_LN	Guanzhuang	Vietnam_LN.SG	-0.0402	0.003921	-10.253	10642	11534	213341
Mbuti	China_YR_LN	Guanzhuang	Liangdao2	-0.0381	0.003768	-10.125	22614	24408	446480
Mbuti	China_Upper_YR_LN	Guanzhuang	Russia_Shamanka_Eneolithic.SG	-0.024	0.002387	-10.049	34034	35707	649617
Mbuti	China_YR_MN	Guanzhuang	Vietnam_N	-0.0584	0.005969	-9.776	5229	5877	103765
Mbuti	China_Shimao_LN	Guanzhuang	Vietnam_N	-0.0609	0.006235	-9.77	5188	5861	103228
Mbuti	China_Miaozigou_MN	Guanzhuang	Japan_HG_Jomon	-0.0636	0.006555	-9.703	7024	7978	139611
Mbuti	China_Shimao_LN	Guanzhuang	Russia_Shamanka_Eneolithic.SG	-0.0263	0.00273	-9.653	33752	35578	646105
Mbuti	China_YR_MN	Guanzhuang	Liangdao2	-0.0396	0.00411	-9.641	22455	24308	444488
Mbuti	China_Shimao_LN	Guanzhuang	Liangdao2	-0.0431	0.004531	-9.52	22217	24220	441764
Mbuti	China_Shimao_LN	Guanzhuang	Laos_BA.WGC	-0.0532	0.005598	-9.498	10318	11477	202286
Mbuti	China_Upper_YR_IA	Guanzhuang	Thailand_IA.SG	-0.0393	0.00415	-9.46	16453	17798	327072
Mbuti	China_Upper_YR_LN	Guanzhuang	BaBanQinCen	-0.0318	0.003392	-9.39	17666	18828	349515
Mbuti	China_Shimao_LN	Guanzhuang	Vietnam_BA_DongSonCulture.SG	-0.0459	0.004893	-9.386	10615	11637	221487
Mbuti	China_Shimao_LN	Guanzhuang	Taiwan_Hanben_IA	-0.0236	0.002535	-9.296	32999	34592	636835
Mbuti	China_YR_LN	Guanzhuang	Vietnam_N	-0.0488	0.005256	-9.294	5283	5826	103996
Mbuti	China_Shimao_LN	Guanzhuang	Vietnam_LN.SG	-0.0458	0.004934	-9.288	10453	11457	210769
Mbuti	China_Upper_YR_LN	Guanzhuang	LaCen	-0.0343	0.00374	-9.181	20102	21532	397924
Mbuti	China_Miaozigou_MN	Guanzhuang	Mongolia_LBA_CenterWest_4	-0.0449	0.004939	-9.081	8734	9554	169189
Mbuti	China_Miaozigou_MN	Guanzhuang	Japan_Jomon.SG	-0.0618	0.006814	-9.064	7264	8221	143723
Mbuti	China_YR_LN	Guanzhuang	Vietnam_BA_DongSonCulture.SG	-0.0352	0.003907	-9.001	10842	11633	224117
Mbuti	China_Shimao_LN	Guanzhuang	Thailand_IA.SG	-0.038	0.004237	-8.973	17200	18559	340607
Mbuti	China_Upper_YR_LN	Guanzhuang	Vietnam_BA_all	-0.0399	0.004494	-8.879	11195	12126	219937
Mbuti	China_YR_MN	Guanzhuang	Vietnam_BA_DongSonCulture.SG	-0.0388	0.004399	-8.812	10737	11603	223114
Mbuti	China_YR_MN	Guanzhuang	Vietnam_LN.SG	-0.0405	0.004628	-8.748	10566	11458	212211
Mbuti	China_Upper_YR_LN	Guanzhuang	GaoHuaHua	-0.0271	0.003103	-8.728	26593	28074	518902
Mbuti	China_Upper_YR_IA	Guanzhuang	Vietnam_LN.SG	-0.0395	0.004579	-8.621	10082	10910	202049
Mbuti	China_Upper_YR_LN	Guanzhuang	Tanshishan	-0.0431	0.005007	-8.602	8313	9061	168825
Mbuti	China_Miaozigou_MN	Guanzhuang	Baojianshan	-0.0647	0.007546	-8.57	5722	6513	116109
Mbuti	China_YR_MN	Guanzhuang	Taiwan_Hanben_IA	-0.0205	0.002395	-8.565	33342	34738	641433
Mbuti	China_Miaozigou_MN	Guanzhuang	Malaysia_Hoabinhian.WGC	-0.1321	0.015795	-8.363	925	1206	19320
Mbuti	China_Shimao_LN	Guanzhuang	Xitoucun	-0.037	0.004447	-8.317	12356	13305	248933
Mbuti	China_YR_LBIA	Guanzhuang	Longlin	-0.0798	0.00962	-8.295	3224	3783	65844
Mbuti	China_Upper_YR_LN	Guanzhuang	Liangdao1	-0.0431	0.005242	-8.23	8434	9195	175678
Mbuti	China_Upper_YR_LN	Guanzhuang	Tonga_2500BP	-0.0505	0.006148	-8.211	5373	5944	108225
Mbuti	China_Miaozigou_MN	Guanzhuang	Laos_LN_BA.SG	-0.0577	0.007048	-8.186	6800	7633	134468
Mbuti	China_Upper_YR_IA	Guanzhuang	Vietnam_N	-0.0511	0.006283	-8.133	5116	5667	100689
Mbuti	China_Upper_YR_IA	Guanzhuang	Liangdao2	-0.0355	0.004374	-8.125	21817	23425	429744
Mbuti	China_YR_LBIA	Guanzhuang	Malaysia_LN.SG	-0.0452	0.005566	-8.123	18896	20686	375557
Mbuti	China_Upper_YR_LN	Guanzhuang	Vietnam_N_all_published	-0.0695	0.008672	-8.014	2458	2825	49672
Mbuti	China_Upper_YR_IA	Guanzhuang	Vietnam_BA_DongSonCulture.SG	-0.0373	0.004672	-7.983	10177	10966	211800
Mbuti	China_Upper_YR_LN	Guanzhuang	Malaysia_historical.SG	-0.0346	0.00434	-7.974	14062	15070	277107
Mbuti	China_YR_LN	Guanzhuang	Xitoucun	-0.0295	0.003773	-7.807	12603	13368	251007
Mbuti	China_Shimao_LN	Guanzhuang	Malaysia_historical.SG	-0.0372	0.004825	-7.718	13965	15045	275668
Mbuti	China_Shimao_LN	Guanzhuang	Shenxian	-0.0382	0.004957	-7.715	14885	16069	299559
Mbuti	China_Upper_YR_LN	Guanzhuang	Tonga_2700BP	-0.0548	0.007161	-7.659	4033	4501	81222
Mbuti	China_YR_MN	Guanzhuang	Vietnam_BA_all	-0.0353	0.004606	-7.658	11274	12098	220728
Mbuti	China_YR_LBIA	Guanzhuang	Russia_Shamanka_Eneolithic.SG	-0.0262	0.003419	-7.657	24011	25302	466375
Mbuti	China_Upper_YR_LN	Guanzhuang	Shenxian	-0.0323	0.004316	-7.473	15025	16026	300150
Mbuti	China_YR_LBIA	Guanzhuang	Dushan	-0.0482	0.006455	-7.471	10191	11224	205580
Mbuti	China_YR_MN	Guanzhuang	LaCen	-0.0277	0.003739	-7.417	20312	21471	399301
Mbuti	China_Shimao_LN	Guanzhuang	Tonga_2700BP	-0.0574	0.007745	-7.416	4017	4507	81166
Mbuti	China_YR_LN	Guanzhuang	Vietnam_BA_all	-0.0319	0.004311	-7.402	11363	12112	221357
Mbuti	China_Shimao_LN	Guanzhuang	Liangdao1	-0.0426	0.005804	-7.347	8423	9173	175396
Mbuti	China_YR_LN	Guanzhuang	Mongolia_East_N	-0.0216	0.002973	-7.266	26665	27842	515969
Mbuti	China_YR_LN	Guanzhuang	Liangdao1	-0.034	0.004681	-7.253	8590	9193	176942
Mbuti	China_YR_LBIA	Guanzhuang	Qihe3	-0.0421	0.005827	-7.218	12334	13417	245268
Mbuti	China_YR_LN	Guanzhuang	Tonga_2700BP	-0.0438	0.006084	-7.206	4100	4476	81729
Mbuti	China_YR_MN	Guanzhuang	Tonga_2700BP	-0.0527	0.00733	-7.188	4057	4509	81556
Mbuti	China_Miaozigou_MN	Guanzhuang	Malaysia_LN.SG	-0.0481	0.006721	-7.151	7325	8064	145290
Mbuti	China_YR_MN	Guanzhuang	Vietnam_N_all_published	-0.0633	0.008865	-7.136	2494	2830	49851
Mbuti	China_YR_MN	Guanzhuang	Shenxian	-0.0319	0.004501	-7.089	15058	16050	301217
Mbuti	China_Shimao_LN	Guanzhuang	LaCen	-0.0304	0.004313	-7.059	20118	21381	396999
Mbuti	China_YR_LN	Guanzhuang	Yumin	-0.0254	0.003623	-7.003	20919	22008	408227
Mbuti	China_Shimao_LN	Guanzhuang	Vietnam_N_all_published	-0.0682	0.009878	-6.902	2456	2816	49605
Mbuti	China_Shimao_LN	Guanzhuang	GaoHuaHua	-0.0245	0.003624	-6.764	26573	27908	516967
Mbuti	China_YR_MN	Guanzhuang	Xitoucun	-0.0291	0.004309	-6.752	12553	13306	250228
Mbuti	China_Shimao_LN	Guanzhuang	Tanshishan	-0.0358	0.005325	-6.722	8362	8982	168733
Mbuti	China_Upper_YR_IA	Guanzhuang	Xitoucun	-0.0289	0.004319	-6.693	12163	12887	242603
Mbuti	China_YR_LN	Guanzhuang	Russia_DevilsCave_N.SG	-0.0185	0.002769	-6.673	34023	35304	655047
Mbuti	China_YR_LN	Guanzhuang	Vietnam_N_all_published	-0.0506	0.007587	-6.672	2527	2797	49959
Mbuti	China_Upper_YR_IA	Guanzhuang	Taiwan_Hanben_IA	-0.0163	0.00245	-6.672	31935	32997	612643
Mbuti	China_Upper_YR_IA	Guanzhuang	Vietnam_N_all_published	-0.0628	0.009432	-6.653	2410	2733	48413
Mbuti	China_Upper_YR_IA	Guanzhuang	LaCen	-0.0271	0.004085	-6.634	19705	20802	386745
Mbuti	China_YR_MN	Guanzhuang	Russia_DevilsCave_N.SG	-0.02	0.003022	-6.623	33687	35063	650491
Mbuti	China_YR_LN	Guanzhuang	BaBanQinCen	-0.0201	0.003038	-6.621	17992	18731	352229
Mbuti	China_YR_MN	Guanzhuang	GaoHuaHua	-0.0221	0.003335	-6.617	26738	27945	520114
Mbuti	China_YR_LN	Guanzhuang	Thailand_IA.WGC	-0.0483	0.007331	-6.589	3140	3458	62548
Mbuti	China_YR_LN	Guanzhuang	Taiwan_Hanben_IA	-0.0142	0.002173	-6.545	33832	34808	645832
Mbuti	China_YR_LBIA	Guanzhuang	Thailand_IA.SG	-0.034	0.005254	-6.464	12525	13405	250741
Mbuti	China_Upper_YR_LN	Guanzhuang	Vietnam_BA	-0.0359	0.005571	-6.449	7438	7993	147468
Mbuti	China_Miaozigou_MN	Guanzhuang	Dushan	-0.0586	0.00909	-6.448	3942	4433	79967
Mbuti	China_YR_MN	Guanzhuang	BaBanQinCen	-0.0234	0.003642	-6.426	17880	18737	350872
Mbuti	China_YR_LN	Guanzhuang	Malaysia_historical.SG	-0.0263	0.00409	-6.422	14331	15104	279423
Mbuti	China_YR_LBIA	Guanzhuang	Liangdao2	-0.0348	0.005464	-6.372	17274	18520	342662
Mbuti	China_YR_LN	Guanzhuang	Shenxian	-0.0249	0.003938	-6.329	15235	16014	302423
Mbuti	China_YR_LN	Guanzhuang	LaCen	-0.0218	0.003494	-6.245	20554	21471	401080
Mbuti	China_YR_LN	Guanzhuang	Tanshishan	-0.0272	0.004389	-6.2	8519	8996	170018
Mbuti	China_Upper_YR_IA	Guanzhuang	Tonga_2700BP	-0.0469	0.007565	-6.196	3957	4346	79280
Mbuti	China_YR_LN	Guanzhuang	GaoHuaHua	-0.0179	0.002893	-6.171	27052	28036	523343
Mbuti	China_YR_MN	Guanzhuang	Malaysia_historical.SG	-0.0281	0.004559	-6.159	14167	14986	277491
Mbuti	China_Upper_YR_IA	Guanzhuang	Tonga_2500BP	-0.0407	0.006634	-6.137	5283	5731	105650
Mbuti	China_YR_MN	Guanzhuang	Tanshishan	-0.0316	0.005175	-6.112	8450	9002	169471
Mbuti	China_Shimao_LN	Guanzhuang	Vietnam_BA_all	-0.0327	0.005406	-6.054	11299	12063	219612
Mbuti	China_YR_LBIA	Guanzhuang	Laos_LN_BA.SG	-0.0337	0.005572	-6.041	17923	19171	346971
Mbuti	China_Shimao_LN	Guanzhuang	Tonga_2500BP	-0.0409	0.006792	-6.029	5421	5884	108135
Mbuti	China_Upper_YR_IA	Guanzhuang	Vietnam_BA_all	-0.0298	0.004942	-6.024	11006	11682	214051
Mbuti	China_YR_MN	Guanzhuang	Yumin	-0.0242	0.004036	-5.999	20870	21906	406566
Mbuti	China_YR_LBIA	Guanzhuang	Laos_BA.WGC	-0.0431	0.007288	-5.919	7345	8008	144007
Mbuti	China_Miaozigou_MN	Guanzhuang	Thailand_IA.SG	-0.0459	0.007757	-5.916	4790	5251	96876
Mbuti	China_YR_MN	Guanzhuang	Vietnam_BA	-0.0322	0.005494	-5.862	7513	8013	147966
Mbuti	China_YR_MN	Guanzhuang	Liangdao1	-0.0321	0.005511	-5.826	8556	9123	176348
Mbuti	China_Upper_YR_LN	Guanzhuang	Thailand_IA.WGC	-0.0464	0.007973	-5.825	3125	3429	62111
Mbuti	China_Miaozigou_MN	Guanzhuang	Laos_BA.WGC	-0.0585	0.010064	-5.817	2758	3101	55446
Mbuti	China_YR_MN	Guanzhuang	Tonga_2500BP	-0.0378	0.006509	-5.805	5463	5893	108674
Mbuti	China_Upper_YR_IA	Guanzhuang	GaoHuaHua	-0.0194	0.003359	-5.769	25766	26785	499834
Mbuti	China_Shimao_LN	Guanzhuang	BaBanQinCen	-0.0221	0.003923	-5.624	17800	18603	348809
Mbuti	China_YR_LN	Guanzhuang	Vietnam_BA	-0.0291	0.005188	-5.607	7550	8002	148390
Mbuti	China_Upper_YR_IA	Guanzhuang	Russia_DevilsCave_N.SG	-0.018	0.003262	-5.522	32144	33323	620291
Mbuti	China_YR_MN	Guanzhuang	Mongolia_East_N	-0.0193	0.003498	-5.504	26583	27626	513338
Mbuti	China_Upper_YR_IA	Guanzhuang	Thailand_IA	-0.1059	0.019836	-5.341	443	547	9305
Mbuti	China_YR_LN	Guanzhuang	Tonga_2500BP	-0.0297	0.005599	-5.298	5509	5845	108944
Mbuti	China_YR_LN	Guanzhuang	China_AR_Xianbei_IA	-0.0254	0.004807	-5.29	7921	8335	153979
Mbuti	China_Miaozigou_MN	Guanzhuang	Vietnam_LN.SG	-0.0523	0.009889	-5.284	2945	3270	60134
Mbuti	China_Miaozigou_MN	Guanzhuang	Qihe3	-0.0449	0.008524	-5.27	4768	5217	95107
Mbuti	China_Upper_YR_IA	Guanzhuang	BaBanQinCen	-0.0197	0.00376	-5.236	17356	18053	339595
Mbuti	China_Upper_YR_IA	Guanzhuang	Liangdao1	-0.0295	0.005662	-5.209	8300	8804	171262
Mbuti	China_Upper_YR_LN	Guanzhuang	Russia_DevilsCave_N.SG	-0.0151	0.002962	-5.109	33885	34926	649471
Mbuti	China_Miaozigou_MN	Guanzhuang	Liangdao2	-0.0376	0.007416	-5.066	6666	7186	132802
Mbuti	China_Upper_YR_IA	Guanzhuang	Yumin	-0.0227	0.004498	-5.052	20217	21157	393855
Mbuti	China_Shimao_LN	Guanzhuang	Vietnam_BA	-0.0315	0.006249	-5.043	7487	7975	147244
Mbuti	China_Miaozigou_MN	Guanzhuang	Taiwan_Hanben_IA	-0.0221	0.00438	-5.043	9207	9623	179452
Mbuti	China_Upper_YR_IA	Guanzhuang	Shenxian	-0.0233	0.004731	-4.929	14724	15427	291827
Mbuti	China_Shimao_LN	Guanzhuang	Thailand_IA.WGC	-0.0438	0.008921	-4.91	3113	3399	61824
Mbuti	China_Upper_YR_IA	Guanzhuang	Malaysia_historical.SG	-0.0241	0.004909	-4.902	13531	14198	264348
Mbuti	China_Miaozigou_MN	Guanzhuang	Russia_Shamanka_Eneolithic.SG	-0.0221	0.004516	-4.902	9402	9828	180810
Mbuti	China_Shimao_LN	Guanzhuang	Russia_DevilsCave_N.SG	-0.016	0.003333	-4.812	33702	34800	645969
Mbuti	China_YR_LBIA	Guanzhuang	Vietnam_N	-0.0404	0.00839	-4.811	4341	4706	85951
Mbuti	China_Upper_YR_IA	Guanzhuang	Tanshishan	-0.026	0.00547	-4.757	8272	8714	164870
Mbuti	China_YR_LN	Guanzhuang	Vietnam_historical.SG	-0.0243	0.005158	-4.715	7509	7883	145351
Mbuti	China_Miaozigou_MN	Guanzhuang	Longlin	-0.0719	0.015368	-4.676	1262	1458	25808
Mbuti	China_YR_LBIA	Guanzhuang	Vietnam_LN.SG	-0.0292	0.00636	-4.589	7784	8252	155849
Mbuti	China_Upper_YR_IA	Guanzhuang	Mongolia_East_N	-0.0157	0.003466	-4.528	25704	26523	495145
Mbuti	China_YR_LBIA	Guanzhuang	Vietnam_N_all_published	-0.055	0.012311	-4.464	2064	2304	41994
Mbuti	China_YR_MN	Guanzhuang	Suogang	-0.0557	0.012496	-4.461	1170	1308	25026
Mbuti	China_Upper_YR_LN	Guanzhuang	Shandong_EN	-0.0138	0.003124	-4.431	25464	26179	492978
Mbuti	China_Upper_YR_IA	Guanzhuang	Thailand_IA.WGC	-0.0382	0.008695	-4.398	3016	3255	59271
Mbuti	China_Miaozigou_MN	Guanzhuang	LaCen	-0.0316	0.007206	-4.391	6097	6495	120700
Mbuti	China_Miaozigou_MN	Guanzhuang	Tonga_2700BP	-0.0667	0.015253	-4.372	1291	1476	26537
Mbuti	China_Miaozigou_MN	Guanzhuang	Xitoucun	-0.0365	0.008358	-4.369	3845	4136	78302
Mbuti	China_YR_LN	Guanzhuang	Thailand_IA	-0.0734	0.016866	-4.354	476	551	9662
Mbuti	China_YR_LBIA	Guanzhuang	Malaysia_historical.SG	-0.028	0.006623	-4.228	10012	10589	198877
Mbuti	China_YR_MN	Guanzhuang	Vietnam_historical.SG	-0.0247	0.005838	-4.225	7444	7820	144460
Mbuti	China_Upper_YR_LN	Guanzhuang	Mongolia_East_N	-0.0135	0.003207	-4.211	26711	27442	511634
Mbuti	China_Upper_YR_IA	Guanzhuang	Shandong_EN	-0.0143	0.003392	-4.205	24623	25336	477494
Mbuti	China_Miaozigou_MN	Guanzhuang	Tonga_2500BP	-0.0535	0.01274	-4.199	1699	1891	34974
Mbuti	China_Miaozigou_MN	Guanzhuang	Vietnam_BA_DongSonCulture.SG	-0.041	0.009789	-4.186	3039	3299	63709
Mbuti	China_YR_LN	Guanzhuang	Shandong_EN	-0.0116	0.002779	-4.158	25747	26349	497124
Mbuti	China_YR_LN	Guanzhuang	China_AR_IA	-0.0415	0.010057	-4.122	1465	1592	29359
Mbuti	China_YR_LN	Guanzhuang	China_WLR_BA_o	-0.0151	0.003664	-4.121	22302	22986	430328
Mbuti	China_YR_LBIA	Guanzhuang	Liangdao1	-0.031	0.007555	-4.097	6800	7234	140750
Mbuti	China_Upper_YR_LN	Guanzhuang	Vietnam_historical.SG	-0.0236	0.005755	-4.097	7442	7802	144175
Mbuti	China_YR_MN	Guanzhuang	China_AR_Xianbei_IA	-0.0225	0.005521	-4.084	7905	8270	153078
Mbuti	China_Upper_YR_LN	Guanzhuang	Thailand_IA	-0.0744	0.01827	-4.07	468	543	9592
Mbuti	China_Shimao_LN	Guanzhuang	Vietnam_historical.SG	-0.0256	0.006342	-4.036	7409	7798	143385
Mbuti	China_YR_LBIA	Guanzhuang	Shenxian	-0.0253	0.006278	-4.026	11794	12405	236955
Mbuti	China_Upper_YR_IA	Guanzhuang	Vietnam_BA	-0.0239	0.005963	-4.008	7330	7689	143342
Mbuti	China_YR_LBIA	Guanzhuang	Vietnam_BA_all	-0.0255	0.006577	-3.875	9176	9656	180187
Mbuti	China_YR_MN	Guanzhuang	Thailand_IA.WGC	-0.0313	0.00825	-3.79	3181	3386	62255
Mbuti	China_YR_LBIA	Guanzhuang	Xitoucun	-0.0227	0.005993	-3.781	10099	10568	201429
Mbuti	China_YR_LBIA	Guanzhuang	Vietnam_BA_DongSonCulture.SG	-0.0243	0.006539	-3.709	8059	8460	166175
Mbuti	China_Shimao_LN	Guanzhuang	China_WLR_BA_o	-0.0165	0.004465	-3.689	22002	22739	425167
Mbuti	China_YR_MN	Guanzhuang	Shandong_EN	-0.0119	0.003236	-3.679	25621	26239	494712
Mbuti	China_Miaozigou_MN	Guanzhuang	Vietnam_N	-0.0466	0.012806	-3.637	1680	1844	33301
Mbuti	China_Miaozigou_MN	Guanzhuang	Shenxian	-0.0312	0.008635	-3.617	4537	4830	92037
Mbuti	China_YR_MN	Guanzhuang	China_WLR_BA_o	-0.0148	0.00411	-3.604	22146	22812	427764
Mbuti	China_YR_LBIA	Guanzhuang	Russia_DevilsCave_N.SG	-0.0141	0.00393	-3.582	24003	24688	466308
Mbuti	China_YR_LBIA	Guanzhuang	Yumin	-0.0205	0.005758	-3.558	16250	16930	317951
Mbuti	China_YR_MN	Guanzhuang	Thailand_IA	-0.0695	0.019698	-3.528	480	551	9624
Mbuti	China_Miaozigou_MN	Guanzhuang	Malaysia_historical.SG	-0.0329	0.009331	-3.528	3851	4114	77054
Mbuti	China_Upper_YR_IA	Guanzhuang	China_AR_IA	-0.0439	0.012543	-3.5	1422	1553	28283
Mbuti	China_Shimao_LN	Guanzhuang	Yumin	-0.0157	0.004498	-3.491	20976	21645	404292
Mbuti	China_Shimao_LN	Guanzhuang	Mongolia_East_N	-0.0131	0.003764	-3.469	26636	27340	510019
Mbuti	China_Shimao_LN	Guanzhuang	Yiyang	-0.0225	0.006624	-3.4	5807	6074	117051
Mbuti	China_Miaozigou_MN	Guanzhuang	Thailand_IA.WGC	-0.0592	0.018031	-3.281	882	993	17538
Mbuti	China_YR_MN	Guanzhuang	China_AR_EN	-0.0159	0.0049	-3.249	9747	10062	189207
Mbuti	China_Upper_YR_LN	Guanzhuang	Yumin	-0.0128	0.003996	-3.195	21097	21643	405124
Mbuti	China_Shimao_LN	Guanzhuang	China_AR_Xianbei_IA	-0.0188	0.005976	-3.146	7894	8197	152243
Mbuti	China_Shimao_LN	Guanzhuang	China_AR_IA	-0.0386	0.012448	-3.103	1442	1557	29044
Mbuti	China_Upper_YR_LN	Guanzhuang	China_AR_Xianbei_IA	-0.0163	0.005257	-3.096	7939	8202	152808
Mbuti	China_Miaozigou_MN	Guanzhuang	Vietnam_BA_all	-0.0303	0.009852	-3.079	3546	3768	69891
Mbuti	China_Upper_YR_IA	Guanzhuang	Vietnam_historical.SG	-0.0186	0.006098	-3.042	7168	7439	137864
Mbuti	China_YR_LN	Guanzhuang	China_AR_EN	-0.0127	0.0042	-3.024	9817	10069	190120
Mbuti	China_Shimao_LN	Guanzhuang	Shandong_EN	-0.0104	0.003462	-3.003	25502	26038	491642
Mbuti	China_Miaozigou_MN	Guanzhuang	BaBanQinCen	-0.0206	0.006906	-2.989	5385	5612	106850
Mbuti	China_Miaozigou_MN	Guanzhuang	GaoHuaHua	-0.0184	0.006198	-2.973	7679	7968	150081
Mbuti	China_Upper_YR_IA	Guanzhuang	China_AR_Xianbei_IA	-0.0168	0.005731	-2.927	7633	7893	147779
Mbuti	China_Miaozigou_MN	Guanzhuang	Thailand_IA	-0.1223	0.042059	-2.908	139	177	3033
Mbuti	China_YR_MN	Guanzhuang	Yiyang	-0.0176	0.006094	-2.882	5872	6082	117691
Mbuti	China_YR_LBIA	Guanzhuang	Vietnam_BA	-0.0218	0.007629	-2.857	6102	6374	120692
Mbuti	China_Miaozigou_MN	Guanzhuang	Liangdao1	-0.0316	0.011125	-2.843	2595	2765	54943
Mbuti	China_YR_LBIA	Guanzhuang	Taiwan_Hanben_IA	-0.0091	0.003206	-2.832	24080	24521	463164
Mbuti	China_Upper_YR_LN	Guanzhuang	Suogang	-0.0346	0.012293	-2.814	1198	1284	24924
Mbuti	China_YR_LBIA	Guanzhuang	Tonga_2500BP	-0.0249	0.008978	-2.778	4476	4705	89335
Mbuti	China_Upper_YR_IA	Guanzhuang	China_AR_EN	-0.0144	0.005235	-2.746	9383	9656	182724
Mbuti	China_Upper_YR_LN	Guanzhuang	China_AR_EN	-0.0129	0.004702	-2.733	9734	9987	188688
Mbuti	China_Upper_YR_IA	Guanzhuang	Suogang	-0.0361	0.013232	-2.726	1170	1257	24404
Mbuti	China_YR_MN	Guanzhuang	China_AR_IA	-0.0301	0.011611	-2.591	1456	1546	29211
Mbuti	China_Upper_YR_LN	Guanzhuang	Yiyang	-0.0156	0.006017	-2.591	5887	6073	117237
Mbuti	China_Upper_YR_IA	Guanzhuang	China_WLR_BA_o	-0.0107	0.004317	-2.472	21401	21862	412030
Mbuti	China_Upper_YR_LN	Guanzhuang	Boshan	-0.0095	0.003915	-2.434	25487	25977	498191
Mbuti	China_YR_LBIA	Guanzhuang	Mongolia_East_N	-0.011	0.004621	-2.375	20140	20586	388692
Mbuti	China_Shimao_LN	Guanzhuang	China_WLR_BA	-0.01	0.004343	-2.305	16651	16988	321490
Mbuti	China_Shimao_LN	Guanzhuang	Thailand_IA	-0.046	0.019975	-2.302	484	531	9589
Mbuti	China_Shimao_LN	Guanzhuang	Suogang	-0.0322	0.014161	-2.276	1211	1292	24899
Mbuti	China_YR_LN	Guanzhuang	Yiyang	-0.0118	0.005355	-2.205	5929	6071	118046
Mbuti	China_Miaozigou_MN	Guanzhuang	Vietnam_N_all_published	-0.0409	0.01895	-2.156	835	906	16301
Mbuti	China_YR_LBIA	Guanzhuang	China_AR_IA	-0.0344	0.016326	-2.109	1095	1173	22602
Mbuti	China_Miaozigou_MN	Guanzhuang	Vietnam_BA	-0.0243	0.011546	-2.107	2354	2471	46801
Mbuti	China_YR_LN	Guanzhuang	Suogang	-0.0234	0.011147	-2.103	1216	1274	25070
Mbuti	China_YR_LBIA	Guanzhuang	Tanshishan	-0.0148	0.007066	-2.101	6909	7117	138175
Mbuti	China_YR_LBIA	Guanzhuang	BaBanQinCen	-0.0101	0.004873	-2.082	14068	14356	274958
Mbuti	China_YR_LBIA	Guanzhuang	China_AR_Xianbei_IA	-0.0163	0.007988	-2.045	5868	6063	114758
Mbuti	China_YR_LBIA	Guanzhuang	Tonga_2700BP	-0.0203	0.009974	-2.032	3466	3609	67988
Mbuti	China_Upper_YR_IA	Guanzhuang	Yiyang	-0.0133	0.00664	-1.998	5741	5896	114481
Mbuti	China_Upper_YR_LN	Guanzhuang	China_WLR_BA	-0.0079	0.00396	-1.991	16741	17007	322451
Mbuti	China_YR_LBIA	Guanzhuang	GaoHuaHua	-0.0091	0.004582	-1.982	19956	20322	386481
Mbuti	China_Miaozigou_MN	Guanzhuang	Tanshishan	-0.0204	0.010358	-1.965	2695	2807	53921
Mbuti	China_YR_LBIA	Guanzhuang	Thailand_IA.WGC	-0.0226	0.011871	-1.908	2343	2451	46142
Mbuti	China_Upper_YR_LN	Guanzhuang	China_AR_IA	-0.0218	0.01182	-1.845	1485	1551	29147
Mbuti	China_Miaozigou_MN	Guanzhuang	Russia_DevilsCave_N.SG	-0.0103	0.005603	-1.842	9399	9595	180781
Mbuti	China_YR_LBIA	Guanzhuang	China_WLR_BA_o	-0.0097	0.005669	-1.715	16433	16756	319312
Mbuti	China_Shimao_LN	Guanzhuang	China_AR_EN	-0.0086	0.005058	-1.706	9775	9945	188177
Mbuti	China_YR_LBIA	Guanzhuang	LaCen	-0.0091	0.005401	-1.678	15940	16232	310027
Mbuti	China_YR_LBIA	Guanzhuang	China_AR_EN	-0.0111	0.006787	-1.631	7485	7652	145614
Mbuti	China_YR_LN	Guanzhuang	China_WLR_BA	-0.0054	0.003517	-1.537	16884	17068	324885
Mbuti	China_YR_LBIA	Guanzhuang	Shandong_EN	-0.0066	0.004397	-1.495	19445	19703	377407
Mbuti	China_YR_LN	Guanzhuang	China_WLR_MN	-0.0043	0.002922	-1.469	34144	34438	648760
Mbuti	China_Miaozigou_MN	Guanzhuang	Vietnam_historical.SG	-0.0177	0.012414	-1.425	2059	2133	40635
Mbuti	China_YR_LBIA	Guanzhuang	Thailand_IA	-0.0363	0.025939	-1.4	404	435	7885
Mbuti	China_Upper_YR_LN	Guanzhuang	China_WLR_LN	-0.0043	0.003245	-1.333	26153	26380	499946
Mbuti	China_Upper_YR_IA	Guanzhuang	China_WLR_BA	-0.0057	0.004366	-1.3	16155	16339	311663
Mbuti	China_Upper_YR_LN	Guanzhuang	China_WLR_BA_o	-0.0052	0.004076	-1.271	22350	22583	426802
Mbuti	China_Miaozigou_MN	Guanzhuang	Mongolia_East_N	-0.0077	0.006125	-1.264	7836	7959	150767
Mbuti	China_YR_LBIA	Guanzhuang	Suogang	-0.021	0.016673	-1.258	1013	1056	21139
Mbuti	China_Upper_YR_LN	Guanzhuang	China_WLR_MN	-0.0038	0.00331	-1.138	33937	34193	643265
Mbuti	China_YR_LN	Guanzhuang	Boshan	-0.004	0.003643	-1.1	25822	26029	502423
Mbuti	China_Upper_YR_IA	Guanzhuang	China_WLR_MN	-0.0038	0.003473	-1.092	32230	32476	614609
Mbuti	China_Miaozigou_MN	Guanzhuang	China_WLR_BA	-0.008	0.008009	-1.003	5020	5101	97758
Mbuti	China_Miaozigou_MN	Guanzhuang	China_WLR_BA_o	-0.0072	0.007469	-0.969	6492	6586	125041
Mbuti	China_Miaozigou_MN	Guanzhuang	China_AR_IA	-0.0244	0.025423	-0.96	453	475	8973
Mbuti	China_YR_MN	Guanzhuang	China_WLR_BA	-0.0035	0.004076	-0.869	16856	16976	323282
Mbuti	China_Upper_YR_IA	Guanzhuang	Boshan	-0.0032	0.004318	-0.745	24756	24916	482918
Mbuti	China_YR_MN	Guanzhuang	China_WLR_LN	-0.0025	0.003397	-0.728	26186	26316	501318
Mbuti	China_Miaozigou_MN	Guanzhuang	Suogang	-0.0187	0.02578	-0.726	417	433	8362
Mbuti	China_YR_LN	Guanzhuang	China_WLR_LN	-0.0021	0.002871	-0.721	26350	26459	503759
Mbuti	China_Shimao_LN	Guanzhuang	China_WLR_LN	-0.0025	0.003511	-0.718	26086	26218	498136
Mbuti	China_Miaozigou_MN	Guanzhuang	Yiyang	-0.0093	0.013349	-0.698	1872	1907	37340
Mbuti	China_YR_LBIA	Guanzhuang	Vietnam_historical.SG	-0.0055	0.008156	-0.68	5450	5511	104360
Mbuti	China_Miaozigou_MN	Guanzhuang	Shandong_EN	-0.0035	0.005603	-0.622	7554	7607	146133
Mbuti	China_YR_MN	Guanzhuang	China_WLR_MN	-0.0021	0.003391	-0.615	33985	34127	644343
Mbuti	China_Upper_YR_IA	Guanzhuang	China_WLR_LN	-0.0018	0.003557	-0.513	25158	25250	481705
Mbuti	China_Shimao_LN	Guanzhuang	Boshan	-0.002	0.004285	-0.455	25589	25689	496783
Mbuti	China_Shimao_LN	Guanzhuang	China_WLR_MN	-0.0017	0.003681	-0.455	33797	33911	639908
Mbuti	China_Miaozigou_MN	Guanzhuang	China_AR_EN	-0.0041	0.010787	-0.378	2935	2959	57101
Mbuti	China_Miaozigou_MN	Guanzhuang	Yumin	-0.002	0.007838	-0.249	6438	6463	123746
Mbuti	China_YR_MN	Guanzhuang	Boshan	-0.0006	0.004085	-0.157	25732	25765	499925
Mbuti	China_YR_LBIA	Guanzhuang	China_WLR_MN	0.0002	0.004581	0.054	24155	24143	463173
Mbuti	China_YR_LBIA	Guanzhuang	China_WLR_LN	0.0006	0.004554	0.127	19565	19542	377882
Mbuti	China_Miaozigou_MN	Guanzhuang	China_WLR_MN	0.0008	0.005688	0.135	9426	9412	179524
Mbuti	China_YR_LBIA	Guanzhuang	Yiyang	0.0019	0.008871	0.212	4784	4766	94875
Mbuti	China_Miaozigou_MN	Guanzhuang	China_AR_Xianbei_IA	0.0025	0.011782	0.212	2344	2332	45058
Mbuti	China_Miaozigou_MN	Guanzhuang	Boshan	0.0054	0.007377	0.734	7569	7487	147423
Mbuti	China_YR_LBIA	Guanzhuang	China_WLR_BA	0.0044	0.005944	0.744	12904	12790	248277
Mbuti	China_Miaozigou_MN	Guanzhuang	China_WLR_LN	0.0078	0.006336	1.226	7720	7601	148107
Mbuti	China_YR_LBIA	Guanzhuang	Boshan	0.0092	0.005552	1.652	19607	19251	379951

## Sheet: F
Table S1F. f4-statistics to evaluate the genetic divergence between Guanzhuang population and previously published genomes of the later Bronze/Iron Age (LBIA) individuals of the Central Plains of China (JXNT and LG, representing the Juozuoniecun and Luoheguxiang sites respectively). Values with |Z|>3 indicate significant results, highlighted in the data by blue (positive) and red (negative); valu…
f4(Mbuti, reference ; Guanzhuang, LG)											f4(Mbuti, reference ; Guanzhuang, JXNT)											f4(Mbuti, reference ; LG, JXNT)
pop1	pop2	pop3	pop4	f4	std.err	Z	ABAB	ABBA	SNPs		pop1	pop2	pop3	pop4	f4	std.err	Z	ABAB	ABBA	SNPs		pop1	pop2	pop3	pop4	f4	std.err	Z	ABAB	ABBA	SNPs
Mbuti	JPT	Guanzhuang	LG	-0.0121	0.002461	-4.909	29583	30307	573772		Mbuti	JPT	Guanzhuang	JXNT	-0.0105	0.002419	-4.334	30111	30749	583587		Mbuti	Mongolia_Dornod_PreBronze	LG	JXNT	-0.0122	0.006167	-1.977	8472	8682	169896
Mbuti	Russia_Tagar	Guanzhuang	LG	-0.0104	0.002921	-3.57	28075	28667	571378		Mbuti	Mongolia_Xiongnu_o2	Guanzhuang	JXNT	-0.0117	0.003811	-3.071	26386	27011	536236		Mbuti	Mongolia_East_N	LG	JXNT	-0.007	0.003564	-1.966	41840	42430	826430
Mbuti	CHB	Guanzhuang	LG	-0.0081	0.002438	-3.31	29701	30184	573772		Mbuti	China_AmurRiver_BA	Guanzhuang	JXNT	-0.0102	0.003418	-2.972	27515	28080	566889		Mbuti	Japanese	LG	JXNT	-0.0054	0.002956	-1.822	46625	47130	916755
Mbuti	CHS	Guanzhuang	LG	-0.0081	0.002452	-3.302	29680	30165	573772		Mbuti	Kazakhstan_Karakhanid	Guanzhuang	JXNT	-0.0135	0.004592	-2.94	15954	16390	322829		Mbuti	Russian	LG	JXNT	-0.0053	0.00308	-1.711	44401	44871	916737
Mbuti	Kazakhstan_Karakhanid	Guanzhuang	LG	-0.0156	0.004742	-3.291	15582	16076	317120		Mbuti	Russia_Srubnaya	Guanzhuang	JXNT	-0.0082	0.002841	-2.892	28663	29138	581072		Mbuti	Thailand_IA	LG	JXNT	-0.0253	0.016295	-1.551	873	919	17459
Mbuti	Kazakhstan_Nomad_IA	Guanzhuang	LG	-0.0141	0.004327	-3.269	19296	19850	393976		Mbuti	Buryat	Guanzhuang	JXNT	-0.0085	0.003027	-2.793	27872	28347	568178		Mbuti	Russia_CentralYakutia_IA	LG	JXNT	-0.0143	0.009487	-1.509	3103	3193	61508
Mbuti	Taiwan_Liangdao_LatePaleolithic	Guanzhuang	LG	-0.027	0.008421	-3.204	3948	4167	75419		Mbuti	Russia_LenaRiver_EN	Guanzhuang	JXNT	-0.0093	0.003417	-2.715	26388	26882	517632		Mbuti	Mongolia_Dundgobi_LatEMedieval	LG	JXNT	-0.0057	0.003941	-1.454	36505	36926	725921
Mbuti	Nepal_Chokhopani_2800BP	Guanzhuang	LG	-0.0124	0.003974	-3.111	29388	30124	573087		Mbuti	Russia_EarlyMedieval_Heshui_Mohe_1	Guanzhuang	JXNT	-0.0186	0.006904	-2.698	5380	5585	112480		Mbuti	Russia_Lokomotiv_Eneolithic	LG	JXNT	-0.0045	0.003185	-1.427	41628	42008	826127
Mbuti	Turkey_N	Guanzhuang	LG	-0.0087	0.002876	-3.021	27301	27779	563192		Mbuti	Kazakhstan_Turk	Guanzhuang	JXNT	-0.0101	0.003744	-2.694	26099	26631	528400		Mbuti	Mongolia_Tuv_LatEMedieval	LG	JXNT	-0.0041	0.003129	-1.299	42265	42610	834858
Mbuti	Atayal	Guanzhuang	LG	-0.0114	0.003782	-3.017	28595	29255	557986		Mbuti	Chukchi	Guanzhuang	JXNT	-0.0064	0.002394	-2.666	30222	30610	583587		Mbuti	Russia_Samara_EBA_Yamnaya_published	LG	JXNT	-0.006	0.004649	-1.294	22445	22717	471788
Mbuti	Hungarian	Guanzhuang	LG	-0.0097	0.003254	-2.983	27198	27731	558911		Mbuti	Kyrgyzstan_TianShan_Hun	Guanzhuang	JXNT	-0.0068	0.002549	-2.653	29002	29397	583495		Mbuti	Hezhen	LG	JXNT	-0.0041	0.003226	-1.279	46514	46899	916733
Mbuti	Tibetan	Guanzhuang	LG	-0.009	0.003031	-2.982	28518	29038	558933		Mbuti	Russia_UstIda_LN	Guanzhuang	JXNT	-0.0081	0.003058	-2.652	27854	28310	568228		Mbuti	Laos_LN_BA	LG	JXNT	-0.0052	0.004162	-1.242	34312	34669	683223
Mbuti	Russia_Alan	Guanzhuang	LG	-0.0091	0.003061	-2.975	27779	28290	570079		Mbuti	Kazakhstan_Nomad_IA	Guanzhuang	JXNT	-0.0105	0.003966	-2.649	19723	20142	400861		Mbuti	Mongolia_Arkhangai_EarlyMedieval	LG	JXNT	-0.0032	0.00266	-1.212	45145	45437	925719
Mbuti	Kazakhstan_Kipchak1	Guanzhuang	LG	-0.0137	0.004659	-2.944	18863	19388	386674		Mbuti	Russia_Samara_EBA_Yamnaya_published2	Guanzhuang	JXNT	-0.0092	0.003527	-2.613	27247	27754	535894		Mbuti	Mongolia_Uvs_EIAXiongnuLateMedival	LG	JXNT	-0.0033	0.002712	-1.199	45212	45507	916807
Mbuti	Buryat	Guanzhuang	LG	-0.0084	0.002886	-2.911	29310	29806	573761		Mbuti	Even	Guanzhuang	JXNT	-0.0078	0.003059	-2.565	27738	28177	568213		Mbuti	China_AR_IA	LG	JXNT	-0.0119	0.010296	-1.153	2475	2534	50339
Mbuti	China_Upper_YR_LN	Guanzhuang	LG	-0.0089	0.003044	-2.908	29374	29899	567979		Mbuti	Nepal_Chokhopani_2800BP	Guanzhuang	JXNT	-0.0102	0.004036	-2.523	29984	30601	582865		Mbuti	Mongolia_Khovd_MLBAEarlyMedieval	LG	JXNT	-0.0038	0.00333	-1.147	42529	42855	863006
Mbuti	Hungary_IA_Scythian	Guanzhuang	LG	-0.0099	0.003491	-2.823	24135	24616	500167		Mbuti	Russia_AngaraRiver_EN	Guanzhuang	JXNT	-0.0101	0.004021	-2.51	29353	29952	573476		Mbuti	Mongolia_EIA_Xiongnu_7	LG	JXNT	-0.0047	0.004125	-1.133	34879	35207	690430
Mbuti	Uyghur	Guanzhuang	LG	-0.0082	0.00296	-2.782	27891	28354	558931		Mbuti	Mongolia_Dornod_Xiongnu	Guanzhuang	JXNT	-0.0101	0.004127	-2.447	22944	23412	451312		Mbuti	Mongolia_Chalcolithic_Afanasievo_1	LG	JXNT	-0.0045	0.004109	-1.097	33331	33633	689344
Mbuti	Russia_KuengaRiver_N_2	Guanzhuang	LG	-0.0114	0.004149	-2.746	26346	26954	512382		Mbuti	China_Shimao_LN	Guanzhuang	JXNT	-0.0331	0.014616	-2.264	1100	1175	23648		Mbuti	Russia_EBA_o1	LG	JXNT	-0.0064	0.005908	-1.087	8753	8866	183859
Mbuti	Kazakhstan_Nomad_HP	Guanzhuang	LG	-0.0097	0.003542	-2.739	28250	28804	553771		Mbuti	Taiwan_Liangdao_LatePaleolithic	Guanzhuang	JXNT	-0.0068	0.003036	-2.24	27781	28161	568226		Mbuti	Russia_KadalinkaRiver_N	LG	JXNT	-0.0045	0.0042	-1.073	44583	44987	876987
Mbuti	Turkey_MLBA_AssyrianColonyPeriod	Guanzhuang	LG	-0.0118	0.004349	-2.711	17794	18219	371991		Mbuti	Russia_EBA_o1	Guanzhuang	JXNT	-0.009	0.00403	-2.226	24263	24702	499352		Mbuti	Kazakhstan_Turk	LG	JXNT	-0.0039	0.003749	-1.049	41380	41707	845024
Mbuti	Miao	Guanzhuang	LG	-0.0084	0.003103	-2.705	28788	29275	558943		Mbuti	Tibetan	Guanzhuang	JXNT	-0.0165	0.007607	-2.167	5130	5302	101675		Mbuti	Russia_IA_EarlySarmatian	LG	JXNT	-0.004	0.003934	-1.009	29246	29479	604172
Mbuti	Russia_ArgunRiver_M	Guanzhuang	LG	-0.0109	0.004142	-2.625	28833	29467	563778		Mbuti	Mongolia_East_N	Guanzhuang	JXNT	-0.008	0.003723	-2.152	23990	24378	469134		Mbuti	Mongolia_Arkhangai_XiongnuEarlyMedieval_2	LG	JXNT	-0.0033	0.003336	-0.999	36746	36992	756111
Mbuti	China_Lahu	Guanzhuang	LG	-0.0084	0.0032	-2.614	28626	29109	558918		Mbuti	Russia_Kalmykia_EBA_Yamnaya	Guanzhuang	JXNT	-0.0059	0.002759	-2.132	28835	29176	581900		Mbuti	Russia_Tuva_IA_AldyBel	LG	JXNT	-0.0037	0.003795	-0.984	34548	34807	704778
Mbuti	Russia_Shamanka_EBA	Guanzhuang	LG	-0.0085	0.003431	-2.476	26828	27288	526700		Mbuti	Tujia	Guanzhuang	JXNT	-0.0072	0.00341	-2.123	24758	25119	517357		Mbuti	Kazakhstan_Nomad_IA_o	LG	JXNT	-0.0057	0.005866	-0.967	10486	10605	219517
Mbuti	CDX	Guanzhuang	LG	-0.0061	0.002452	-2.471	29626	29987	573772		Mbuti	CDX	Guanzhuang	JXNT	-0.023	0.010927	-2.106	2391	2504	47384		Mbuti	Mongolia_Dornod_Xiongnu	LG	JXNT	-0.0038	0.003977	-0.966	40454	40766	800945
Mbuti	Mongolia_Xiongnu_o2	Guanzhuang	LG	-0.0088	0.003594	-2.454	26014	26477	527307		Mbuti	Sherpa	Guanzhuang	JXNT	-0.0064	0.003027	-2.103	27824	28180	568194		Mbuti	Uyghur	LG	JXNT	-0.0029	0.003031	-0.957	45389	45653	916707
Mbuti	Russia_Chita_BA	Guanzhuang	LG	-0.0192	0.007864	-2.439	4236	4402	84220		Mbuti	Russia_UstIda_EBA	Guanzhuang	JXNT	-0.0068	0.003322	-2.05	27248	27621	538868		Mbuti	Daur	LG	JXNT	-0.0035	0.003676	-0.94	46442	46763	914550
Mbuti	Kazakhstan_Turk	Guanzhuang	LG	-0.0094	0.003892	-2.419	25697	26186	519470		Mbuti	Kazakhstan_Nomad_HP	Guanzhuang	JXNT	-0.0069	0.003565	-1.936	28791	29191	563438		Mbuti	Mongolia_Sukhbaatar_MLBAXiongnuLatEMedieval_sister	LG	JXNT	-0.0087	0.009408	-0.93	3166	3222	62748
Mbuti	Laos_BA	Guanzhuang	LG	-0.0146	0.00606	-2.408	8861	9123	178435		Mbuti	Japan_Jomon	Guanzhuang	JXNT	-0.0084	0.00433	-1.928	23156	23546	461165		Mbuti	Shenxian	LG	JXNT	-0.004	0.004379	-0.923	26913	27132	539699
Mbuti	Russia_BA_Okunevo	Guanzhuang	LG	-0.0067	0.002786	-2.401	28727	29114	573606		Mbuti	Russia_Samara_EBA_Yamnaya_published	Guanzhuang	JXNT	-0.0075	0.003927	-1.915	26061	26456	535982		Mbuti	Yumin	LG	JXNT	-0.0036	0.004011	-0.894	36904	37170	734451
Mbuti	China_SEastAsia_Island_LN	Guanzhuang	LG	-0.0355	0.014955	-2.376	1101	1182	23592		Mbuti	Russia_Siberia_Irkutsk_EBA	Guanzhuang	JXNT	-0.0236	0.012581	-1.873	1535	1609	31730		Mbuti	Mongolia_EIA_SlabGrave_1	LG	JXNT	-0.0024	0.002689	-0.893	46556	46780	913766
Mbuti	Russia_KolymaRiver_LN	Guanzhuang	LG	-0.0079	0.003322	-2.376	29431	29900	573682		Mbuti	Taiwan_Hanben_IA_lc	Guanzhuang	JXNT	-0.0141	0.007608	-1.851	4077	4193	76757		Mbuti	Russia_Kalmykia_EBA_Yamnaya	LG	JXNT	-0.0027	0.003058	-0.877	43565	43800	903735
Mbuti	Tajik	Guanzhuang	LG	-0.0073	0.003081	-2.356	27295	27694	558945		Mbuti	Russia_Samara_EBA_Yamnaya	Guanzhuang	JXNT	-0.0093	0.005052	-1.841	12964	13207	271801		Mbuti	Nepal_Samdzong_1500BP	LG	JXNT	-0.0025	0.002983	-0.845	47644	47885	936179
Mbuti	Ukraine_Scythian	Guanzhuang	LG	-0.0084	0.003591	-2.333	26353	26798	540429		Mbuti	She	Guanzhuang	JXNT	-0.0061	0.003344	-1.812	29201	29557	568216		Mbuti	China_Shimao_LN	LG	JXNT	-0.0028	0.003424	-0.827	47527	47797	927749
Mbuti	Adygei	Guanzhuang	LG	-0.0074	0.003364	-2.196	27257	27663	558914		Mbuti	Laos_Hoabinhian	Guanzhuang	JXNT	-0.0091	0.005221	-1.745	12261	12486	255007		Mbuti	Liangdao1	LG	JXNT	-0.0042	0.005157	-0.813	16087	16222	333080
Mbuti	Sherpa	Guanzhuang	LG	-0.0072	0.003276	-2.193	28693	29108	558934		Mbuti	Japanese	Guanzhuang	JXNT	-0.0051	0.002914	-1.739	29338	29636	568240		Mbuti	Mongolia_Sukhbaatar_MLBAXiongnuLatEMedieval	LG	JXNT	-0.0021	0.00262	-0.808	46954	47154	923087
Mbuti	Cambodian	Guanzhuang	LG	-0.0069	0.003161	-2.193	28487	28885	558935		Mbuti	Russia_Karasuk_oRISE	Guanzhuang	JXNT	-0.0058	0.003358	-1.729	29924	30274	583488		Mbuti	Mongolia_Khentii_LatEMedieval	LG	JXNT	-0.0029	0.003571	-0.804	41903	42145	830154
Mbuti	Russia_Lokomotiv_Eneolithic	Guanzhuang	LG	-0.0074	0.003468	-2.142	25995	26384	508610		Mbuti	Russia_CentralYakutia_IA	Guanzhuang	JXNT	-0.0066	0.003913	-1.68	29035	29420	565770		Mbuti	Mongolia_EBA_Ulgii_1_dup	LG	JXNT	-0.0033	0.004123	-0.802	41458	41732	822908
Mbuti	Kazakhstan_Central_Saka	Guanzhuang	LG	-0.0065	0.003093	-2.104	27581	27942	550348		Mbuti	Dai	Guanzhuang	JXNT	-0.006	0.003631	-1.652	27729	28063	567140		Mbuti	Suogang	LG	JXNT	-0.0067	0.008467	-0.797	3163	3206	65790
Mbuti	French	Guanzhuang	LG	-0.0064	0.00306	-2.089	27317	27668	558970		Mbuti	China_SEastAsia_Coastal_LN	Guanzhuang	JXNT	-0.0107	0.006791	-1.573	6213	6347	125324		Mbuti	LaCen	LG	JXNT	-0.003	0.003936	-0.768	35222	35435	697223
Mbuti	Kazakhstan_Karluk_1	Guanzhuang	LG	-0.0083	0.004002	-2.066	26714	27159	533605		Mbuti	Kazakhstan_Central_Saka	Guanzhuang	JXNT	-0.0049	0.003121	-1.569	28018	28294	559683		Mbuti	Tonga_2500BP	LG	JXNT	-0.004	0.005375	-0.74	12940	13044	255287
Mbuti	Russia_Shamanka_Eneolithic	Guanzhuang	LG	-0.0056	0.00278	-2.013	29531	29863	573709		Mbuti	Oroqen	Guanzhuang	JXNT	-0.0048	0.003073	-1.566	29239	29522	568198		Mbuti	Mongolia_Bulgan_EarlyMedieval	LG	JXNT	-0.0028	0.003863	-0.735	37475	37689	744577
Mbuti	Russia_Srubnaya	Guanzhuang	LG	-0.0058	0.002895	-2.012	27308	27628	557409		Mbuti	Russia_Krasnoyarsk_BA	Guanzhuang	JXNT	-0.0176	0.011253	-1.565	1964	2035	39147		Mbuti	Tajik	LG	JXNT	-0.0022	0.002993	-0.724	44347	44540	916730
Mbuti	Xibo	Guanzhuang	LG	-0.0053	0.002643	-1.989	29635	29948	573755		Mbuti	Russia_KolymaRiver_LN_1d	Guanzhuang	JXNT	-0.0062	0.003998	-1.553	29808	30181	583276		Mbuti	Mongolia_EIA_8	LG	JXNT	-0.0031	0.004273	-0.723	35021	35238	690921
Mbuti	Russia_Kurma_EBA	Guanzhuang	LG	-0.0085	0.004294	-1.986	17469	17769	346514		Mbuti	China_Upper_YR_IA	Guanzhuang	JXNT	-0.0069	0.004463	-1.54	19546	19817	402035		Mbuti	Mongolia_Arkhangai_PreBronze	LG	JXNT	-0.0029	0.004042	-0.705	34429	34626	681836
Mbuti	Tu	Guanzhuang	LG	-0.0048	0.002459	-1.934	29603	29886	573757		Mbuti	Atayal	Guanzhuang	JXNT	-0.0046	0.002999	-1.524	27654	27908	568214		Mbuti	Thai	LG	JXNT	-0.0021	0.003081	-0.693	46389	46587	916684
Mbuti	Ulchi	Guanzhuang	LG	-0.0062	0.003236	-1.906	28730	29086	558918		Mbuti	Ulchi	Guanzhuang	JXNT	-0.0062	0.004094	-1.522	29680	30053	583520		Mbuti	BaBanQinCen	LG	JXNT	-0.0023	0.003368	-0.669	31785	31929	629572
Mbuti	Tonga_2700BP	Guanzhuang	LG	-0.0156	0.008422	-1.847	3762	3881	76240		Mbuti	Nepal_Mebrak_2125BP	Guanzhuang	JXNT	-0.0069	0.004538	-1.516	19135	19400	371376		Mbuti	Mongolia_EBA_Chemurchek_2	LG	JXNT	-0.0024	0.003606	-0.668	38249	38434	785346
Mbuti	Russia_Ust_Ishim	Guanzhuang	LG	-0.0068	0.003697	-1.844	25505	25855	526055		Mbuti	Russia_KuengaRiver_N_1	Guanzhuang	JXNT	-0.0061	0.004071	-1.496	26862	27191	521546		Mbuti	China_AmurRiver_LPaleolithic	LG	JXNT	-0.0022	0.003291	-0.666	37920	38086	750132
Mbuti	Russia_KolymaRiver_LN_1d	Guanzhuang	LG	-0.0101	0.005592	-1.814	10755	10976	209934		Mbuti	China_SEastAsia_Coastal_Historic	Guanzhuang	JXNT	-0.01	0.006849	-1.467	6028	6150	124204		Mbuti	Nepal_Mebrak_2125BP	LG	JXNT	-0.0029	0.004438	-0.663	31758	31946	625605
Mbuti	Russia_SaltovoMayaki	Guanzhuang	LG	-0.0194	0.01074	-1.803	2022	2102	44056		Mbuti	China_YR_LN	Guanzhuang	JXNT	-0.0057	0.003941	-1.449	20664	20902	411538		Mbuti	Tanshishan	LG	JXNT	-0.0029	0.004372	-0.66	17825	17929	358566
Mbuti	Russia_HG_Karelia	Guanzhuang	LG	-0.0076	0.00432	-1.753	24033	24400	493127		Mbuti	Russia_NorthOssetian	Guanzhuang	JXNT	-0.0125	0.008984	-1.396	3281	3364	68356		Mbuti	Russia_Karasuk_oRISE	LG	JXNT	-0.0017	0.002671	-0.641	45850	46007	935353
Mbuti	Russia_DevilsCave_N	Guanzhuang	LG	-0.006	0.003509	-1.723	29612	29972	573605		Mbuti	Russia_SaltovoMayaki	Guanzhuang	JXNT	-0.004	0.003012	-1.339	26832	27049	548659		Mbuti	Russia_UstIda_LN	LG	JXNT	-0.0021	0.003279	-0.638	42912	43092	857539
Mbuti	Russia_MLBA_Sintashta	Guanzhuang	LG	-0.0047	0.002755	-1.707	27552	27813	561300		Mbuti	China_WLR_BA	Guanzhuang	JXNT	-0.0041	0.003069	-1.335	30007	30254	577616		Mbuti	Russia_NorthOssetian	LG	JXNT	-0.002	0.003224	-0.632	44305	44485	916742
Mbuti	Yakut	Guanzhuang	LG	-0.0054	0.003235	-1.681	28643	28956	558921		Mbuti	Russia_AginBuryat_N	Guanzhuang	JXNT	-0.004	0.003042	-1.302	28409	28635	579811		Mbuti	Han	LG	JXNT	-0.0018	0.002886	-0.61	46885	47051	916762
Mbuti	Dai	Guanzhuang	LG	-0.0047	0.002801	-1.675	29650	29929	573770		Mbuti	Laos_LN_BA	Guanzhuang	JXNT	-0.0056	0.004286	-1.301	22033	22280	433206		Mbuti	Russia_KuengaRiver_N_1	LG	JXNT	-0.0057	0.009393	-0.604	3071	3106	61821
Mbuti	Russia_Samara_EBA_Yamnaya	Guanzhuang	LG	-0.0053	0.003167	-1.665	26447	26727	541104		Mbuti	Mongolia_Dundgobi_LatEMedieval	Guanzhuang	JXNT	-0.0059	0.004594	-1.284	19406	19636	382060		Mbuti	China_Xinjian_IA	LG	JXNT	-0.0021	0.003456	-0.594	33077	33214	665797
Mbuti	Russia_Abkhasian	Guanzhuang	LG	-0.0053	0.003218	-1.662	27289	27582	558930		Mbuti	Russia_IA_Yankovsky	Guanzhuang	JXNT	-0.0055	0.004308	-1.28	28074	28385	543866		Mbuti	Russia_Krasnoyarsk_BA	LG	JXNT	-0.0022	0.003877	-0.574	47503	47714	936140
Mbuti	Oroqen	Guanzhuang	LG	-0.0054	0.003322	-1.639	28796	29112	558915		Mbuti	Mongolia_Dornod_PreBronze	Guanzhuang	JXNT	-0.0107	0.008383	-1.275	4276	4368	85604		Mbuti	Russia_HG_Karelia	LG	JXNT	-0.0023	0.004108	-0.569	40891	41083	842237
Mbuti	Tujia	Guanzhuang	LG	-0.0042	0.002577	-1.623	29776	30026	573759		Mbuti	Cambodian	Guanzhuang	JXNT	-0.0035	0.002822	-1.25	29961	30173	583574		Mbuti	Russia_MBA_Poltavka	LG	JXNT	-0.002	0.003484	-0.566	37252	37399	768325
Mbuti	Kazakhstan_Central_Steppe_EMBA	Guanzhuang	LG	-0.0054	0.003318	-1.619	28802	29113	573571		Mbuti	Russia_Afanasievo	Guanzhuang	JXNT	-0.0157	0.012618	-1.241	1549	1598	31993		Mbuti	Russia_MLBA_Sintashta	LG	JXNT	-0.0013	0.002573	-0.514	44980	45099	926769
Mbuti	Russia_Karasuk_oRISE	Guanzhuang	LG	-0.0047	0.002885	-1.616	28412	28678	572208		Mbuti	CHS	Guanzhuang	JXNT	-0.0041	0.003297	-1.231	28960	29196	568216		Mbuti	Russia_Abkhasian	LG	JXNT	-0.0015	0.003015	-0.499	44215	44348	916698
Mbuti	Kazakhstan_Wusun_LateSaka_dup	Guanzhuang	LG	-0.0103	0.006516	-1.578	5872	5994	119185		Mbuti	Ami	Guanzhuang	JXNT	-0.0044	0.003618	-1.221	28807	29062	567206		Mbuti	Kazakhstan_Kumsay_EBA	LG	JXNT	-0.0017	0.003346	-0.498	39579	39712	810237
Mbuti	Mongola	Guanzhuang	LG	-0.0049	0.003169	-1.552	28792	29077	558936		Mbuti	China_Miaozigou_MN	Guanzhuang	JXNT	-0.0037	0.003104	-1.204	29268	29487	568194		Mbuti	China_WLR_BA	LG	JXNT	-0.002	0.003971	-0.496	26512	26617	522288
Mbuti	Kazakhstan_Kimak	Guanzhuang	LG	-0.0107	0.006899	-1.547	5382	5499	108845		Mbuti	Russia_IA_2	Guanzhuang	JXNT	-0.0049	0.004214	-1.173	17095	17265	350924		Mbuti	Sherpa	LG	JXNT	-0.0015	0.00308	-0.494	46498	46640	916719
Mbuti	Russia_NorthOssetian	Guanzhuang	LG	-0.0049	0.003221	-1.531	27346	27617	558954		Mbuti	Russia_Mezhovskaya	Guanzhuang	JXNT	-0.0031	0.002698	-1.153	27992	28166	569987		Mbuti	Mongolia_LBA_CenterWest_4_o	LG	JXNT	-0.002	0.004123	-0.482	35590	35732	702349
Mbuti	Tonga_2500BP	Guanzhuang	LG	-0.0118	0.007758	-1.527	5084	5206	101114		Mbuti	Russia_LBA_1	Guanzhuang	JXNT	-0.0047	0.004101	-1.149	25208	25447	487272		Mbuti	Longlin	LG	JXNT	-0.0028	0.005931	-0.469	9620	9673	198319
Mbuti	China_HMMH_MN	Guanzhuang	LG	-0.007	0.004595	-1.524	18211	18468	357151		Mbuti	Tonga_2500BP	Guanzhuang	JXNT	-0.0098	0.008618	-1.14	3828	3904	76749		Mbuti	Russia_Samara_EBA_Yamnaya	LG	JXNT	-0.0014	0.002953	-0.468	43907	44029	905038
Mbuti	Russia_Afanasievo	Guanzhuang	LG	-0.0044	0.002871	-1.518	27437	27677	557300		Mbuti	Russian	Guanzhuang	JXNT	-0.0042	0.003703	-1.138	27351	27582	565009		Mbuti	Russia_ArgunRiver_M	LG	JXNT	-0.0019	0.004165	-0.463	46678	46859	916287
Mbuti	Kazakhstan_Kumsay_EBA	Guanzhuang	LG	-0.0053	0.003613	-1.469	21988	22223	446987		Mbuti	Thailand_IA	Guanzhuang	JXNT	-0.0035	0.003044	-1.136	29173	29375	568210		Mbuti	JPT	LG	JXNT	-0.0011	0.002372	-0.447	48215	48317	936610
Mbuti	She	Guanzhuang	LG	-0.0037	0.002607	-1.416	29795	30016	573754		Mbuti	Russia_Tuva_IA_AldyBel	Guanzhuang	JXNT	-0.0041	0.00366	-1.132	25980	26197	534350		Mbuti	Kazakhstan_TianShan_Saka	LG	JXNT	-0.0043	0.009569	-0.446	2711	2735	58256
Mbuti	Russia_Krasnoyarsk_BA	Guanzhuang	LG	-0.0058	0.004128	-1.412	29356	29700	573486		Mbuti	Russia_Tagar	Guanzhuang	JXNT	-0.0051	0.004521	-1.125	18078	18263	366236		Mbuti	Mongolia_Arkhangai_Xiongnu_o	LG	JXNT	-0.0017	0.003923	-0.439	40973	41114	804972
Mbuti	Kazakhstan_GoldenHordeAsian	Guanzhuang	LG	-0.0056	0.003963	-1.409	27797	28109	542647		Mbuti	Han	Guanzhuang	JXNT	-0.0032	0.002815	-1.123	29464	29651	568249		Mbuti	Oroqen	LG	JXNT	-0.0015	0.003366	-0.438	46714	46852	916688
Mbuti	Even	Guanzhuang	LG	-0.0045	0.003213	-1.404	28705	28965	558952		Mbuti	Mongolia_Tuv_EIA	Guanzhuang	JXNT	-0.0059	0.00528	-1.116	13469	13628	265019		Mbuti	Mongolia_Selenge_Xiongnu	LG	JXNT	-0.0018	0.004228	-0.435	39334	39479	769043
Mbuti	Mongolia_Xiongnu_o1	Guanzhuang	LG	-0.0042	0.00312	-1.356	29550	29801	573343		Mbuti	Mongolia_Arkhangai_EarlyMedieval	Guanzhuang	JXNT	-0.0029	0.002709	-1.068	28097	28260	568937		Mbuti	China_WLR_MN	LG	JXNT	-0.0015	0.003559	-0.434	47667	47814	931078
Mbuti	Kazakhstan_Kangju_o1	Guanzhuang	LG	-0.0056	0.004146	-1.353	17891	18093	369069		Mbuti	China_SEastAsia_Island_EN	Guanzhuang	JXNT	-0.0047	0.004428	-1.062	14247	14381	283220		Mbuti	CDX	LG	JXNT	-0.001	0.002405	-0.42	47910	48007	936610
Mbuti	Russia_Andronovo	Guanzhuang	LG	-0.0045	0.003366	-1.35	27774	28028	567136		Mbuti	Russia_MN_Boisman	Guanzhuang	JXNT	-0.0033	0.00316	-1.051	27852	28038	568233		Mbuti	Kazakhstan_Wusun_LateSaka_dup	LG	JXNT	-0.0023	0.005781	-0.391	9300	9342	190043
Mbuti	Naxi	Guanzhuang	LG	-0.0038	0.002863	-1.342	28959	29182	558968		Mbuti	Russia_UstBelaya_Angara	Guanzhuang	JXNT	-0.0039	0.003774	-1.044	22310	22487	441236		Mbuti	Kazakhstan_Korgantas_IA	LG	JXNT	-0.0015	0.003965	-0.387	38615	38733	763465
Mbuti	Russian	Guanzhuang	LG	-0.0041	0.003071	-1.34	27538	27766	558949		Mbuti	Russia_Lokomotiv_Eneolithic	Guanzhuang	JXNT	-0.0048	0.00459	-1.039	19621	19809	398966		Mbuti	Mongolia_Sukhbaatar_LatEMedieval	LG	JXNT	-0.001	0.002566	-0.387	47402	47496	931321
Mbuti	China_YR_LN	Guanzhuang	LG	-0.0036	0.002745	-1.313	29781	29996	572864		Mbuti	Mongolia_Xiongnu_o1	Guanzhuang	JXNT	-0.0033	0.00318	-1.024	30045	30242	583140		Mbuti	Kazakhstan_Botai_Eneolithic	LG	JXNT	-0.0013	0.003503	-0.384	38541	38645	782125
Mbuti	Russia_MA1_HG	Guanzhuang	LG	-0.0059	0.004576	-1.29	19391	19622	392949		Mbuti	Russia_AfontovaGora2	Guanzhuang	JXNT	-0.0079	0.007866	-1.004	4799	4875	102945		Mbuti	Russia_Afanasievo	LG	JXNT	-0.001	0.002723	-0.355	44994	45081	923440
Mbuti	Russia_MBA_Poltavka	Guanzhuang	LG	-0.005	0.003939	-1.257	21211	21422	434035		Mbuti	Russia_Siberia_Lena_EBA_o	Guanzhuang	JXNT	-0.0043	0.004562	-0.933	18161	18317	361088		Mbuti	Yiyang	LG	JXNT	-0.002	0.005584	-0.351	12022	12069	241878
Mbuti	Russia_IA_2	Guanzhuang	LG	-0.0058	0.004609	-1.253	19863	20094	399386		Mbuti	Druze	Guanzhuang	JXNT	-0.0032	0.003563	-0.909	29235	29425	566807		Mbuti	CHB	LG	JXNT	-0.0008	0.002359	-0.35	48157	48237	936610
Mbuti	Russia_Buryatia_Xiongnu_mother	Guanzhuang	LG	-0.0057	0.004575	-1.251	16956	17152	334152		Mbuti	Russia_Shamanka_EBA	Guanzhuang	JXNT	-0.0024	0.002687	-0.89	30114	30258	583513		Mbuti	Russia_LenaRiver_EN	LG	JXNT	-0.0013	0.004138	-0.321	40448	40555	793854
Mbuti	Kazakhstan_Berel_IA_o3	Guanzhuang	LG	-0.0039	0.003147	-1.24	27884	28102	544196		Mbuti	Xibo	Guanzhuang	JXNT	-0.0025	0.002894	-0.867	28042	28183	568196		Mbuti	China_AmurRiver_EarlyN	LG	JXNT	-0.0011	0.003615	-0.313	34202	34280	676738
Mbuti	Mongolia_Khuvsgul_XiongnuLatEMedieval_1	Guanzhuang	LG	-0.004	0.00325	-1.238	25458	25664	511930		Mbuti	Hezhen	Guanzhuang	JXNT	-0.0028	0.003226	-0.863	29272	29435	568224		Mbuti	Mongolia_LBA_Ulaanzukh_2_dup	LG	JXNT	-0.0013	0.004307	-0.308	37325	37425	736553
Mbuti	China_Xinjian_IA	Guanzhuang	LG	-0.0047	0.003942	-1.201	20382	20576	404707		Mbuti	Thai	Guanzhuang	JXNT	-0.0197	0.022942	-0.861	445	463	9006		Mbuti	Liangdao2	LG	JXNT	-0.0012	0.004066	-0.307	37510	37604	746301
Mbuti	Russia_CentralYakutia_LN	Guanzhuang	LG	-0.0048	0.003987	-1.193	28700	28975	556273		Mbuti	Russia_Potapovka	Guanzhuang	JXNT	-0.0092	0.010927	-0.845	2063	2102	44425		Mbuti	Vietnam_BA	LG	JXNT	-0.0015	0.005106	-0.301	15186	15233	298539
Mbuti	China_SEastAsia_Coastal_Historic	Guanzhuang	LG	-0.0082	0.00691	-1.19	6176	6279	124933		Mbuti	Mongolia_Arkhangai_MLBAtoEIAorMedieval_o	Guanzhuang	JXNT	-0.0067	0.007955	-0.836	4675	4738	92465		Mbuti	China_Miaozigou_MN	LG	JXNT	-0.0014	0.004918	-0.291	14516	14558	284790
Mbuti	Kazakhstan_Nomad_Hun_Sarmatian	Guanzhuang	LG	-0.0046	0.003917	-1.18	25016	25248	489554		Mbuti	Tonga_2700BP	Guanzhuang	JXNT	-0.002	0.00248	-0.787	30169	30287	583571		Mbuti	Kazakhstan_Central_Saka	LG	JXNT	-0.0009	0.003082	-0.285	44486	44564	897708
Mbuti	China_AR_Xianbei_IA	Guanzhuang	LG	-0.0071	0.006197	-1.141	7036	7136	138166		Mbuti	Kazakhstan_Central_Steppe_EMBA	Guanzhuang	JXNT	-0.0026	0.003281	-0.786	29386	29538	583371		Mbuti	Chukchi	LG	JXNT	-0.001	0.00364	-0.268	45555	45644	915795
Mbuti	Han	Guanzhuang	LG	-0.0032	0.002899	-1.09	28984	29167	558973		Mbuti	Russia_MA1_HG	Guanzhuang	JXNT	-0.003	0.003848	-0.781	21430	21559	438724		Mbuti	Russia_Potapovka	LG	JXNT	-0.0017	0.006266	-0.267	7360	7385	150549
Mbuti	Nepal_Mebrak_2125BP	Guanzhuang	LG	-0.0051	0.004751	-1.079	18829	19023	365949		Mbuti	Russia_KolymaRiver_LN	Guanzhuang	JXNT	-0.0043	0.005536	-0.772	11010	11104	213412		Mbuti	Mongolia_Tuv_EIA	LG	JXNT	-0.0012	0.004452	-0.266	26364	26426	518756
Mbuti	Russia_LBA_1	Guanzhuang	LG	-0.013	0.012315	-1.058	1539	1579	32495		Mbuti	Kazakhstan_Kumsay_EBA	Guanzhuang	JXNT	-0.0027	0.003621	-0.751	22259	22380	451496		Mbuti	Russia_Buryatia_Xiongnu	LG	JXNT	-0.0008	0.002896	-0.264	45228	45297	892024
Mbuti	Mongolia_Uvurkhangai_Xiongnu	Guanzhuang	LG	-0.004	0.003744	-1.057	25028	25227	486995		Mbuti	Russia_Ust_Ishim	Guanzhuang	JXNT	-0.0022	0.003045	-0.737	27877	28002	543715		Mbuti	Mongolia_Arkhangai_XiongnuEarlyMedieval_3	LG	JXNT	-0.0006	0.002664	-0.244	46428	46488	925490
Mbuti	Mongolia_Arkhangai_XiongnuEarlyMedieval_3	Guanzhuang	LG	-0.003	0.002816	-1.051	28440	28609	560485		Mbuti	Russia_Chita_BA	Guanzhuang	JXNT	-0.0025	0.003367	-0.731	30193	30342	583395		Mbuti	CHS	LG	JXNT	-0.0005	0.00238	-0.206	48155	48202	936610
Mbuti	Mongolia_Sukhbaatar_MLBA	Guanzhuang	LG	-0.0051	0.005111	-1.001	13946	14090	275914		Mbuti	Nepal_Samdzong_1500BP	Guanzhuang	JXNT	-0.0023	0.003118	-0.73	30089	30226	583198		Mbuti	Kazakhstan_ZevakinoChilikta_IA_2	LG	JXNT	-0.0011	0.005442	-0.199	12449	12476	253587
Mbuti	China_Upper_YR_IA	Guanzhuang	LG	-0.0033	0.00334	-0.98	28307	28493	545768		Mbuti	Mongolia_EIA_Xiongnu_7	Guanzhuang	JXNT	-0.0033	0.004556	-0.714	17541	17656	344786		Mbuti	Kazakhstan_Nomad_HP	LG	JXNT	-0.0007	0.003371	-0.198	45667	45728	901085
Mbuti	China_SEastAsia_Coastal_LN	Guanzhuang	LG	-0.0043	0.004432	-0.971	14164	14286	281158		Mbuti	China_Xinjian_IA	Guanzhuang	JXNT	-0.0088	0.012827	-0.689	1183	1204	23776		Mbuti	Ami	LG	JXNT	-0.0006	0.003148	-0.187	46954	47010	916702
Mbuti	Kazakhstan_Wusun	Guanzhuang	LG	-0.0033	0.003744	-0.872	25578	25746	518543		Mbuti	CHB	Guanzhuang	JXNT	-0.0026	0.00376	-0.679	28983	29132	567408		Mbuti	Yakut	LG	JXNT	-0.0006	0.003203	-0.176	46524	46576	916686
Mbuti	Japanese	Guanzhuang	LG	-0.0026	0.003065	-0.853	28950	29102	558964		Mbuti	Russia_HG_Karelia	Guanzhuang	JXNT	-0.0031	0.004514	-0.679	20158	20282	403781		Mbuti	Kazakhstan_Kangju_o1	LG	JXNT	-0.0007	0.003795	-0.173	28565	28603	595198
Mbuti	Mongolia_Selenge_XiongnuMedieval_o1	Guanzhuang	LG	-0.0055	0.006562	-0.845	6843	6919	135696		Mbuti	Kazakhstan_Nomad_Hun_Sarmatian	Guanzhuang	JXNT	-0.0026	0.003874	-0.675	25487	25621	498168		Mbuti	China_Tianyuan	LG	JXNT	-0.0007	0.004041	-0.171	36721	36772	753089
Mbuti	Russia_Buryatia_PreBronze	Guanzhuang	LG	-0.0035	0.004256	-0.833	19979	20121	390412		Mbuti	Mongolia_Khovd_MLBAEarlyMedieval	Guanzhuang	JXNT	-0.0023	0.003457	-0.671	25115	25232	504397		Mbuti	Russia_MA1_HG	LG	JXNT	-0.0007	0.004373	-0.168	32429	32477	664607
Mbuti	Yi	Guanzhuang	LG	-0.0026	0.003169	-0.832	28979	29132	558934		Mbuti	Kazakhstan_Korgantas_IA	Guanzhuang	JXNT	-0.003	0.004485	-0.661	21933	22063	430381		Mbuti	Russia_EarlyMedieval_Heshui_Mohe_1	LG	JXNT	-0.0008	0.005114	-0.15	13402	13422	264905
Mbuti	Guanzhuang_o1	Guanzhuang	LG	-0.016	0.019349	-0.828	608	628	11752		Mbuti	Russia_Siberia_UP	Guanzhuang	JXNT	-0.0018	0.002856	-0.639	27824	27926	565791		Mbuti	Mongolia_Bulgan_EarlyMedievalLatEMedieval	LG	JXNT	-0.0004	0.002828	-0.149	46342	46381	912125
Mbuti	Kazakhstan_IA_Berel_Pazyryk	Guanzhuang	LG	-0.0029	0.003549	-0.817	25659	25808	509345		Mbuti	Daur	Guanzhuang	JXNT	-0.0017	0.002784	-0.616	30236	30340	583582		Mbuti	Russia_BA_Okunevo	LG	JXNT	-0.0004	0.002732	-0.133	46442	46475	936345
Mbuti	Russia_Tuva_IA_AldyBel	Guanzhuang	LG	-0.0036	0.004464	-0.799	18020	18149	363880		Mbuti	Russia_KuengaRiver_N_2	Guanzhuang	JXNT	-0.0025	0.00415	-0.613	17884	17976	352451		Mbuti	Mongolia_IA_Xianbei	LG	JXNT	-0.0005	0.004123	-0.11	35929	35961	711192
Mbuti	Kazakhstan_ZevakinoChilikta_IA_2	Guanzhuang	LG	-0.005	0.006248	-0.797	7360	7434	147643		Mbuti	Russia_Abkhasian	Guanzhuang	JXNT	-0.0016	0.002701	-0.604	27873	27964	565667		Mbuti	Russia_CentralYakutia_LN	LG	JXNT	-0.0004	0.003871	-0.108	46605	46644	911885
Mbuti	Mongolia_Khovd_MLBAXiongnuLatEMedieval	Guanzhuang	LG	-0.004	0.005067	-0.797	12269	12369	241010		Mbuti	China_SEastAsia_Island_LN	Guanzhuang	JXNT	-0.0023	0.004023	-0.576	21155	21253	420577		Mbuti	Mongolia_Xiongnu_o1	LG	JXNT	-0.0003	0.002938	-0.09	47669	47694	935794
Mbuti	Daur	Guanzhuang	LG	-0.003	0.003768	-0.797	28774	28947	557545		Mbuti	Kazakhstan_Wusun_LateSaka_dup	Guanzhuang	JXNT	-0.004	0.006963	-0.575	5966	6014	121439		Mbuti	Mongolia_Khentii_Xiongnu	LG	JXNT	-0.0004	0.00404	-0.087	39715	39743	780128
Mbuti	Mongolia_Khentii_EIA_SlabGrave	Guanzhuang	LG	-0.0074	0.009537	-0.777	2928	2972	58702		Mbuti	Miao	Guanzhuang	JXNT	-0.0017	0.003106	-0.537	29443	29541	568222		Mbuti	Mongolia_Tuv_Xiongnu	LG	JXNT	-0.0003	0.003823	-0.082	42746	42773	838916
Mbuti	Russia_AfontovaGora2	Guanzhuang	LG	-0.0098	0.012775	-0.77	1542	1572	31838		Mbuti	Russia_Buryatia_Xiongnu_mother	Guanzhuang	JXNT	-0.0059	0.011421	-0.517	2000	2024	38058		Mbuti	Russia_Tagar	LG	JXNT	-0.0001	0.002806	-0.051	45601	45614	931891
Mbuti	Russia_KadalinkaRiver_N	Guanzhuang	LG	-0.0033	0.004311	-0.769	27671	27855	534902		Mbuti	Mongolia_Sukhbaatar_MLBAXiongnuLatEMedieval	Guanzhuang	JXNT	-0.0014	0.002755	-0.514	29134	29217	565248		Mbuti	Russia_KolymaRiver_LN_1d	LG	JXNT	-0.0002	0.0049	-0.049	17265	17273	339481
Mbuti	Taiwan_Hanben_IA	Guanzhuang	LG	-0.002	0.002627	-0.766	29438	29556	567823		Mbuti	Russia_KadalinkaRiver_N	Guanzhuang	JXNT	-0.0016	0.00313	-0.508	26634	26719	544862		Mbuti	Mongolia_LBA_Ulaanzukh_2	LG	JXNT	-0.0001	0.003303	-0.043	39933	39944	786389
Mbuti	Russia_Buryatia_Xiongnu	Guanzhuang	LG	-0.0023	0.003166	-0.74	26800	26926	523519		Mbuti	Guanzhuang_o1	Guanzhuang	JXNT	-0.0052	0.010271	-0.507	2559	2586	53806		Mbuti	Kazakhstan_Nomad_IA	LG	JXNT	-0.0001	0.003662	-0.04	31494	31503	643149
Mbuti	Mongolia_IA_Xianbei	Guanzhuang	LG	-0.0034	0.004664	-0.739	17934	18058	354381		Mbuti	Naxi	Guanzhuang	JXNT	-0.0013	0.002876	-0.45	29492	29568	568242		Mbuti	Mongolia_Khuvsgul_XiongnuLatEMedieval_2	LG	JXNT	0	0.002839	-0.015	45375	45379	897070
Mbuti	Mongolia_Arkhangai_EarlyMedieval	Guanzhuang	LG	-0.0021	0.002809	-0.732	27734	27848	560269		Mbuti	Mongolia_EBA_Ulgii_1_dup	Guanzhuang	JXNT	-0.0018	0.004233	-0.432	23805	23892	468455		Mbuti	Mongolia_Bulgan_Xiongnu	LG	JXNT	0.0001	0.003399	0.024	42170	42163	831350
Mbuti	Kazakhstan_IA_Saka_dup	Guanzhuang	LG	-0.0062	0.008693	-0.715	3718	3765	76174		Mbuti	Mongolia_Khentii_EIA_SlabGrave	Guanzhuang	JXNT	-0.0041	0.009745	-0.416	2946	2970	59040		Mbuti	Taiwan_Hanben_IA	LG	JXNT	0.0001	0.002624	0.032	47841	47833	932109
Mbuti	China_Shimao_LN	Guanzhuang	LG	-0.0025	0.003472	-0.71	29453	29599	565731		Mbuti	Mongolia_Chalcolithic_Afanasievo_1	Guanzhuang	JXNT	-0.0019	0.004626	-0.413	16701	16765	342862		Mbuti	Mongolia_Arkhangai_XiongnuEarlyMedieval_1	LG	JXNT	0.0001	0.004094	0.034	37970	37960	784997
Mbuti	China_SEastAsia_Island_EN	Guanzhuang	LG	-0.0028	0.003945	-0.704	20945	21062	416431		Mbuti	Taiwan_Hanben_IA	Guanzhuang	JXNT	-0.0049	0.012356	-0.397	1670	1686	32698		Mbuti	Russia_UstIda_EBA	LG	JXNT	0.0002	0.003448	0.047	35114	35102	700325
Mbuti	China_Miaozigou_MN	Guanzhuang	LG	-0.0041	0.005823	-0.698	8386	8455	162813		Mbuti	Laos_BA	Guanzhuang	JXNT	-0.0022	0.005752	-0.388	9209	9250	182185		Mbuti	China_YR_LBIA	LG	JXNT	0.0002	0.004051	0.055	37599	37582	741354
Mbuti	Russia_Blagovechensk_IA	Guanzhuang	LG	-0.0039	0.005539	-0.698	12019	12113	232461		Mbuti	Russia_Shamanka_Eneolithic	Guanzhuang	JXNT	-0.0014	0.003605	-0.386	23931	23997	466568		Mbuti	Mongolia_Dornod_LatEMedieval	LG	JXNT	0.0002	0.002856	0.076	46296	46276	911761
Mbuti	Thailand_IA	Guanzhuang	LG	-0.0167	0.024017	-0.694	444	459	8921		Mbuti	China_YR_MN	Guanzhuang	JXNT	-0.0011	0.002806	-0.382	30345	30410	582569		Mbuti	Russia_AfontovaGora3	LG	JXNT	0.0005	0.005899	0.08	10727	10717	230258
Mbuti	Mongolia_Bulgan_Xiongnu	Guanzhuang	LG	-0.0025	0.003652	-0.694	24122	24245	471639		Mbuti	Mongolia_IA_Xianbei	Guanzhuang	JXNT	-0.0017	0.004491	-0.372	18024	18084	356341		Mbuti	Kazakhstan_IA_Berel_Pazyryk	LG	JXNT	0.0004	0.00332	0.106	42972	42942	860991
Mbuti	Mongolia_Umungobi_LatEMedieval	Guanzhuang	LG	-0.002	0.003017	-0.648	26608	26712	520057		Mbuti	Mongolia_Uvs_EIAXiongnuLateMedival	Guanzhuang	JXNT	-0.0011	0.002896	-0.367	27893	27953	558011		Mbuti	GaoHuaHua	LG	JXNT	0.0004	0.003346	0.12	41743	41710	817394
Mbuti	China_AR_EN	Guanzhuang	LG	-0.0038	0.005883	-0.645	8769	8836	171679		Mbuti	Mongolia_Uvurkhangai_Xiongnu	Guanzhuang	JXNT	-0.0013	0.003528	-0.357	25293	25357	493213		Mbuti	China_AmurRiver_Mesolithic	LG	JXNT	0.0004	0.003412	0.125	32343	32316	636464
Mbuti	China_AmurRiver_N	Guanzhuang	LG	-0.0024	0.003728	-0.632	19303	19394	379059		Mbuti	Mongolia_Sukhbaatar_LatEMedieval	Guanzhuang	JXNT	-0.0009	0.002637	-0.34	29789	29842	575979		Mbuti	Kazakhstan_Central_Steppe_EMBA	LG	JXNT	0.0004	0.003263	0.127	46609	46571	936242
Mbuti	Russia_Kalmykia_EBA_Yamnaya	Guanzhuang	LG	-0.0021	0.0033	-0.622	26262	26370	536868		Mbuti	Russia_Buryatia_Xiongnu	Guanzhuang	JXNT	-0.0016	0.004895	-0.335	17218	17275	336902		Mbuti	Russia_AngaraRiver_EN	LG	JXNT	0.0005	0.004064	0.128	45024	44977	885572
Mbuti	China_YR_MN	Guanzhuang	LG	-0.0019	0.003247	-0.59	29644	29758	569374		Mbuti	Mongolia_Uvurkhangai_EIALatEMedieval	Guanzhuang	JXNT	-0.0012	0.003648	-0.326	24044	24101	470014		Mbuti	Mongolia_North_N	LG	JXNT	0.0004	0.002923	0.132	44929	44894	883758
Mbuti	China_WLR_BA	Guanzhuang	LG	-0.0028	0.004734	-0.582	15079	15163	293133		Mbuti	Mongolia_Bulgan_Xiongnu	Guanzhuang	JXNT	-0.0009	0.00358	-0.241	24442	24484	477338		Mbuti	Russia_KolymaRiver_LN	LG	JXNT	0.0005	0.00331	0.139	47736	47692	936469
Mbuti	Mongolia_Khuvsgul_XiongnuLatEMedieval_2	Guanzhuang	LG	-0.0017	0.003028	-0.577	27090	27184	529656		Mbuti	Mongolia_LBA_CenterWest_4_o	Guanzhuang	JXNT	-0.001	0.004589	-0.223	18337	18374	358272		Mbuti	Nepal_Chokhopani_2800BP	LG	JXNT	0.0006	0.003967	0.148	47812	47755	934621
Mbuti	Mongolia_Tuv_EIA	Guanzhuang	LG	-0.003	0.005254	-0.564	13469	13549	262941		Mbuti	Uyghur	Guanzhuang	JXNT	-0.002	0.009117	-0.219	3000	3012	59577		Mbuti	Cambodian	LG	JXNT	0.0005	0.003034	0.174	46334	46285	916706
Mbuti	Mongolia_Bulgan_EarlyMedieval	Guanzhuang	LG	-0.0025	0.00448	-0.551	20715	20818	407827		Mbuti	Russia_Siberia_Tenisei_EBA	Guanzhuang	JXNT	-0.001	0.005204	-0.194	13526	13554	268911		Mbuti	Naxi	LG	JXNT	0.0005	0.002895	0.178	46980	46931	916767
Mbuti	Mongolia_Tuv_Xiongnu	Guanzhuang	LG	-0.0022	0.004051	-0.548	24873	24984	483297		Mbuti	Mongolia_Selenge_XiongnuMedieval_o1	Guanzhuang	JXNT	-0.0012	0.006498	-0.185	6991	7007	136977		Mbuti	Russia_AginBuryat_N	LG	JXNT	0.001	0.004789	0.202	15873	15843	310610
Mbuti	Mongolia_Bulgan_LatEMedieval	Guanzhuang	LG	-0.0023	0.004299	-0.537	19325	19414	377253		Mbuti	Kazakhstan_GoldenHordeAsian	Guanzhuang	JXNT	-0.0007	0.004019	-0.165	28367	28405	551984		Mbuti	Russia_Mezhovskaya	LG	JXNT	0.0007	0.003665	0.202	42054	41992	864958
Mbuti	Russia_AfontovaGora3	Guanzhuang	LG	-0.0044	0.008246	-0.533	4790	4832	102527		Mbuti	Russia_Alan	Guanzhuang	JXNT	-0.0005	0.003222	-0.15	28348	28375	576544		Mbuti	Dai	LG	JXNT	0.0006	0.002806	0.209	47944	47888	936602
Mbuti	Russia_Mezhovskaya	Guanzhuang	LG	-0.002	0.003894	-0.512	24787	24887	506328		Mbuti	China_Upper_YR_LN	Guanzhuang	JXNT	-0.0004	0.003219	-0.111	28825	28845	554465		Mbuti	Even	LG	JXNT	0.0007	0.003229	0.213	46623	46559	916750
Mbuti	Mongolia_Arkhangai_XiongnuEarlyMedieval_1	Guanzhuang	LG	-0.0021	0.004318	-0.491	21084	21173	431422		Mbuti	Russia_AfontovaGora3	Guanzhuang	JXNT	-0.0004	0.005278	-0.072	10148	10156	197547		Mbuti	Yi	LG	JXNT	0.0007	0.003078	0.23	46987	46920	916700
Mbuti	Russia_Potapovka	Guanzhuang	LG	-0.0037	0.009101	-0.411	3320	3345	68211		Mbuti	Mongola	Guanzhuang	JXNT	-0.0001	0.003113	-0.044	29380	29388	568215		Mbuti	Russia_Andronovo	LG	JXNT	0.0007	0.003064	0.231	45132	45068	930536
Mbuti	Thai	Guanzhuang	LG	-0.0013	0.003046	-0.411	28709	28781	558924		Mbuti	Russia_CentralYakutia_LN	Guanzhuang	JXNT	-0.0003	0.007983	-0.034	4413	4415	85985		Mbuti	Shandong_EN	LG	JXNT	0.0008	0.003211	0.244	41672	41606	815921
Mbuti	Mongolia_Arkhangai_Xiongnu_o	Guanzhuang	LG	-0.0018	0.004376	-0.405	23362	23445	455026		Mbuti	Yakut	Guanzhuang	JXNT	-0.0001	0.003206	-0.026	29525	29530	568209		Mbuti	Russia_Srubnaya	LG	JXNT	0.0007	0.002749	0.245	44986	44926	923246
Mbuti	Mongolia_East_N	Guanzhuang	LG	-0.0014	0.003702	-0.385	23838	23906	464213		Mbuti	Kazakhstan_Botai_Eneolithic	Guanzhuang	JXNT	-0.0001	0.003774	-0.018	21510	21513	432221		Mbuti	Atayal	LG	JXNT	0.001	0.003812	0.258	46868	46775	915234
Mbuti	Mongolia_Sukhbaatar_LatEMedieval	Guanzhuang	LG	-0.0008	0.002634	-0.316	29322	29370	566847		Mbuti	Mongolia_Arkhangai_PreBronze	Guanzhuang	JXNT	0	0.004649	-0.005	18489	18490	362121		Mbuti	Russia_IA_2	LG	JXNT	0.0011	0.004195	0.272	36018	35935	727375
Mbuti	Russia_MN_Boisman	Guanzhuang	LG	-0.001	0.003258	-0.294	24562	24610	478018		Mbuti	Mongolia_EIA_8	Guanzhuang	JXNT	0	0.004767	-0.001	17747	17748	347444		Mbuti	Russia_Buryatia_Xiongnu_mother	LG	JXNT	0.0013	0.004327	0.304	33213	33126	655369
Mbuti	China_SEastAsia_Coastal_EN	Guanzhuang	LG	-0.0021	0.007116	-0.291	6021	6046	123429		Mbuti	Mongolia_Khuvsgul_XiongnuLatEMedieval_2	Guanzhuang	JXNT	0	0.003106	0.009	27496	27495	536790		Mbuti	China_Wuzhuangguoliang_LN	LG	JXNT	0.0026	0.008378	0.308	2894	2879	57336
Mbuti	Taiwan_Gongguan	Guanzhuang	LG	-0.0014	0.004926	-0.29	14686	14728	288523		Mbuti	Taiwan_Gongguan	Guanzhuang	JXNT	0.0001	0.002625	0.038	29982	29976	577131		Mbuti	Russia_AfontovaGora2	LG	JXNT	0.0028	0.00854	0.323	3586	3566	73305
Mbuti	China_WLR_LN	Guanzhuang	LG	-0.001	0.004053	-0.235	23368	23412	451778		Mbuti	Kazakhstan_Karluk_1	Guanzhuang	JXNT	0.0002	0.00397	0.043	27401	27391	542743		Mbuti	Russia_MN_Boisman	LG	JXNT	0.001	0.003036	0.334	43283	43196	848865
Mbuti	Nepal_Samdzong_1500BP	Guanzhuang	LG	-0.0007	0.002973	-0.235	29655	29696	573401		Mbuti	China_AmurRiver_EarlyN	Guanzhuang	JXNT	0.0021	0.027213	0.077	397	395	7714		Mbuti	China_AmurRiver_BA	LG	JXNT	0.0048	0.014087	0.338	1245	1234	24660
Mbuti	Mongolia_Sukhbaatar_MLBAXiongnuLatEMedieval	Guanzhuang	LG	-0.0006	0.002674	-0.23	28780	28815	556811		Mbuti	Mongolia_Dornod_LatEMedieval	Guanzhuang	JXNT	0.0002	0.002881	0.085	28451	28437	553328		Mbuti	Mongolia_Ulaanbaatar_EIALatEMedieval	LG	JXNT	0.0015	0.004262	0.359	24498	24423	481876
Mbuti	Kazakhstan_Korgantas_IA	Guanzhuang	LG	-0.0008	0.004385	-0.172	21724	21756	425439		Mbuti	Russia_Kurma_EBA	Guanzhuang	JXNT	0.0011	0.012185	0.093	1624	1620	33016		Mbuti	China_Upper_YR_IA	LG	JXNT	0.0012	0.003235	0.375	46468	46355	904447
Mbuti	Laos_LN_BA	Guanzhuang	LG	-0.0006	0.00431	-0.146	21803	21831	425513		Mbuti	Mongolia_Sukhbaatar_MLBA	Guanzhuang	JXNT	0.0005	0.005057	0.108	14196	14181	277937		Mbuti	Russia_Blagovechensk_IA	LG	JXNT	0.002	0.004747	0.413	19234	19159	375624
Mbuti	China_WLR_MN	Guanzhuang	LG	-0.0005	0.003712	-0.126	29610	29638	568775		Mbuti	China_Wuzhuangguoliang_LN	Guanzhuang	JXNT	0.0005	0.003636	0.143	30119	30087	578496		Mbuti	Russia_DevilsCave_N	LG	JXNT	0.0015	0.003385	0.436	48059	47918	936329
Mbuti	Vietnam_LN	Guanzhuang	LG	-0.0006	0.005415	-0.116	9423	9435	188658		Mbuti	China_HMMH_MN	Guanzhuang	JXNT	0.0009	0.006363	0.148	7127	7113	139748		Mbuti	Boshan	LG	JXNT	0.0019	0.00421	0.443	41424	41269	813807
Mbuti	China_WLR_BA_o	Guanzhuang	LG	-0.0003	0.004355	-0.07	19730	19742	383841		Mbuti	Mongolia_Tuv_Xiongnu	Guanzhuang	JXNT	0.0006	0.004164	0.148	25237	25207	489377		Mbuti	Mongolia_Khentii_Xiongnu_daughter	LG	JXNT	0.002	0.004399	0.447	28856	28743	568827
Mbuti	Mongolia_LBA_CenterWest_4_o	Guanzhuang	LG	-0.0002	0.004635	-0.05	18248	18257	355989		Mbuti	Kazakhstan_Wusun	Guanzhuang	JXNT	0.0006	0.003628	0.159	26077	26047	527229		Mbuti	Ulchi	LG	JXNT	0.0015	0.003318	0.464	46809	46665	916681
Mbuti	Mongolia_Khentii_Xiongnu_daughter	Guanzhuang	LG	-0.0002	0.004725	-0.032	14350	14354	281682		Mbuti	Mongolia_Tuv_LatEMedieval	Guanzhuang	JXNT	0.0006	0.003477	0.175	24410	24381	475499		Mbuti	Kazakhstan_Kimak	LG	JXNT	0.0028	0.005995	0.475	8340	8293	168820
Mbuti	Russia_AngaraRiver_EN	Guanzhuang	LG	-0.0001	0.003928	-0.025	27924	27929	541872		Mbuti	Mongolia_Sukhbaatar_MLBAXiongnuLatEMedieval_sister	Guanzhuang	JXNT	0.0026	0.013996	0.185	1465	1457	28664		Mbuti	Kazakhstan_Kipchak1	LG	JXNT	0.0021	0.004256	0.485	30321	30196	618453
Mbuti	Kazakhstan_Nomad_IA_o	Guanzhuang	LG	-0.0001	0.006487	-0.018	7011	7013	142858		Mbuti	Mongolia_Khuvsgul_XiongnuLatEMedieval_1	Guanzhuang	JXNT	0.0006	0.003137	0.192	25892	25861	518602		Mbuti	Russia_Ust_Ishim	LG	JXNT	0.002	0.003831	0.516	42072	41906	871273
Mbuti	Kazakhstan_Botai_Eneolithic	Guanzhuang	LG	0	0.003897	-0.007	21281	21282	427902		Mbuti	China_Lahu	Guanzhuang	JXNT	0.0011	0.00467	0.229	18661	18621	363365		Mbuti	China_YR_LN	LG	JXNT	0.0014	0.002615	0.538	48192	48057	936070
Mbuti	Eskimo_Chaplin	Guanzhuang	LG	0	0.003631	-0.003	28772	28773	558409		Mbuti	Mongolia_Khentii_Xiongnu	Guanzhuang	JXNT	0.0013	0.004378	0.296	22089	22031	428352		Mbuti	Mongolia_Umungobi_LatEMedieval	LG	JXNT	0.0016	0.002913	0.539	45106	44965	888458
Mbuti	Altaian	Guanzhuang	LG	0	0.003706	0.009	28534	28532	557927		Mbuti	Yi	Guanzhuang	JXNT	0.0062	0.019405	0.318	623	615	12069		Mbuti	Mongolia_Uvurkhangai_Xiongnu	LG	JXNT	0.0018	0.00333	0.551	43338	43179	850248
Mbuti	Mongolia_Uvs_EIAXiongnuLateMedival	Guanzhuang	LG	0.0001	0.002923	0.036	27565	27559	549874		Mbuti	Russia_MBA_Poltavka	Guanzhuang	JXNT	0.0013	0.003907	0.332	25243	25178	513566		Mbuti	Russia_IA_Yankovsky	LG	JXNT	0.0025	0.00444	0.562	31448	31291	613166
Mbuti	China_Wuzhuangguoliang_LN	Guanzhuang	LG	0.001	0.012654	0.082	1165	1162	23479		Mbuti	Kazakhstan_TianShan_Saka	Guanzhuang	JXNT	0.0039	0.011104	0.348	1872	1857	38622		Mbuti	Buryat	LG	JXNT	0.0017	0.00288	0.587	47599	47439	936589
Mbuti	Mongolia_EIA_SlabGrave_1	Guanzhuang	LG	0.0003	0.002732	0.115	28226	28209	545756		Mbuti	Mongolia_Umungobi_LatEMedieval	Guanzhuang	JXNT	0.0011	0.003158	0.349	27015	26955	526754		Mbuti	Russia_SaltovoMayaki	LG	JXNT	0.0047	0.008004	0.587	3945	3908	86239
Mbuti	China_AR_IA	Guanzhuang	LG	0.0017	0.013689	0.125	1326	1321	26685		Mbuti	Russia_Buryatia_PreBronze	Guanzhuang	JXNT	0.0011	0.002995	0.358	27267	27209	530625		Mbuti	Kazakhstan_Karakhanid	LG	JXNT	0.0027	0.00451	0.603	25092	24956	510696
Mbuti	Mongolia_Bulgan_EarlyMedievalLatEMedieval	Guanzhuang	LG	0.0005	0.00302	0.162	28076	28049	545446		Mbuti	Mongolia_Bulgan_LatEMedieval	Guanzhuang	JXNT	0.0016	0.004307	0.366	19554	19493	380920		Mbuti	China_HMMH_MN	LG	JXNT	0.0027	0.004373	0.609	29008	28854	572436
Mbuti	Mongolia_Selenge_Xiongnu	Guanzhuang	LG	0.0007	0.004313	0.168	22092	22060	425933		Mbuti	China_WLR_BA_o	Guanzhuang	JXNT	0.0017	0.004425	0.378	15306	15255	296656		Mbuti	Xitoucun	LG	JXNT	0.0025	0.003887	0.644	24525	24403	486887
Mbuti	Mongolia_EBA_Ulgii_1_dup	Guanzhuang	LG	0.0008	0.004316	0.178	23536	23500	463051		Mbuti	Russia_DevilsCave_N	Guanzhuang	JXNT	0.0029	0.007195	0.401	5842	5809	114436		Mbuti	Mongolia_Khuvsgul_XiongnuLatEMedieval_1	LG	JXNT	0.0021	0.003067	0.7	43386	43200	880018
Mbuti	Mongolia_LBA_Ulaanzukh_2_dup	Guanzhuang	LG	0.001	0.004604	0.221	19860	19820	388399		Mbuti	Russia_BA_Okunevo	Guanzhuang	JXNT	0.0022	0.005276	0.426	12240	12185	236502		Mbuti	China_Lahu	LG	JXNT	0.0023	0.003216	0.702	46809	46598	916668
Mbuti	Vietnam_BA	Guanzhuang	LG	0.0018	0.006674	0.269	6996	6971	137162		Mbuti	Russia_Andronovo	Guanzhuang	JXNT	0.0019	0.00407	0.458	28498	28392	551111		Mbuti	Russia_UstBelaya_Angara	LG	JXNT	0.0021	0.002902	0.721	45984	45792	904533
Mbuti	Mongolia_Khovd_MLBAEarlyMedieval	Guanzhuang	LG	0.001	0.003572	0.274	24903	24854	498000		Mbuti	Mongolia_North_N	Guanzhuang	JXNT	0.0015	0.003182	0.486	26588	26506	517303		Mbuti	Kazakhstan_Nomad_Hun_Sarmatian	LG	JXNT	0.0026	0.003608	0.731	40108	39897	793682
Mbuti	Mongolia_North_N	Guanzhuang	LG	0.0009	0.003192	0.276	26317	26271	511368		Mbuti	Mongolia_Bulgan_EarlyMedievalLatEMedieval	Guanzhuang	JXNT	0.0015	0.00296	0.504	28491	28406	553469		Mbuti	Tonga_2700BP	LG	JXNT	0.0046	0.006051	0.757	10344	10249	205055
Mbuti	Ami	Guanzhuang	LG	0.0009	0.003261	0.277	29074	29021	558921		Mbuti	Kazakhstan_IA_Berel_Pazyryk	Guanzhuang	JXNT	0.0019	0.003627	0.512	26050	25954	516144		Mbuti	Guanzhuang_o1	LG	JXNT	0.0144	0.018961	0.758	700	680	13405
Mbuti	Russia_IA_EarlySarmatian	Guanzhuang	LG	0.0013	0.004317	0.308	17086	17041	346910		Mbuti	Tu	Guanzhuang	JXNT	0.0016	0.002973	0.521	28873	28783	568233		Mbuti	China_AmurRiver_N	LG	JXNT	0.0023	0.002963	0.77	37710	37539	742277
Mbuti	Mongolia_Arkhangai_PreBronze	Guanzhuang	LG	0.0016	0.004728	0.339	18396	18337	358653		Mbuti	Mongolia_Selenge_Xiongnu	Guanzhuang	JXNT	0.0023	0.004445	0.522	22312	22209	430362		Mbuti	Mongola	LG	JXNT	0.0024	0.002991	0.793	46918	46696	916717
Mbuti	Japan_Jomon	Guanzhuang	LG	0.0015	0.004398	0.349	23107	23037	452978		Mbuti	Mongolia_EIA_SlabGrave_1	Guanzhuang	JXNT	0.0016	0.002837	0.567	28645	28553	553358		Mbuti	Russia_Alan	LG	JXNT	0.0025	0.003145	0.8	45198	44971	930376
Mbuti	China_AmurRiver_EarlyN	Guanzhuang	LG	0.0017	0.004294	0.394	16670	16614	327543		Mbuti	Mongolia_Khovd_MLBAXiongnuLatEMedieval	Guanzhuang	JXNT	0.003	0.005204	0.572	12546	12472	243283		Mbuti	Tibetan	LG	JXNT	0.0024	0.002952	0.815	46637	46413	916699
Mbuti	Hezhen	Guanzhuang	LG	0.0013	0.003111	0.404	28945	28873	558942		Mbuti	Vietnam_LN	Guanzhuang	JXNT	0.0046	0.006768	0.686	4943	4897	97598		Mbuti	Taiwan_Gongguan	LG	JXNT	0.0037	0.004222	0.872	30835	30608	602534
Mbuti	China_NEastAsia_Coastal_EN	Guanzhuang	LG	0.0015	0.00339	0.432	26002	25926	502912		Mbuti	China_NEastAsia_Coastal_EN	Guanzhuang	JXNT	0.004	0.005665	0.701	8541	8474	164807		Mbuti	Kazakhstan_Wusun	LG	JXNT	0.0033	0.003754	0.879	41541	41267	849750
Mbuti	Mongolia_Khentii_Xiongnu	Guanzhuang	LG	0.0021	0.004238	0.486	21814	21724	424197		Mbuti	Mongolia_Ulaanbaatar_EIALatEMedieval	Guanzhuang	JXNT	0.0038	0.005382	0.703	11635	11548	228093		Mbuti	Vietnam_N	LG	JXNT	0.0044	0.004971	0.883	11463	11363	225950
Mbuti	Russia_CentralYakutia_IA	Guanzhuang	LG	0.0058	0.011632	0.5	1973	1950	37599		Mbuti	Mongolia_Khentii_Xiongnu_daughter	Guanzhuang	JXNT	0.0035	0.004948	0.704	14545	14444	283591		Mbuti	Mongolia_Khentii_EIA_SlabGrave	LG	JXNT	0.0061	0.00671	0.906	6708	6627	131660
Mbuti	Russia_IA_Yankovsky	Guanzhuang	LG	0.0027	0.005161	0.524	14531	14453	282185		Mbuti	Russia_MLBA_Sintashta	Guanzhuang	JXNT	0.0024	0.003341	0.713	24935	24817	483171		Mbuti	Taiwan_Liangdao_LatePaleolithic	LG	JXNT	0.0062	0.006414	0.973	7076	6988	131546
Mbuti	Laos_Hoabinhian	Guanzhuang	LG	0.003	0.004903	0.613	12221	12148	249711		Mbuti	Vietnam_BA	Guanzhuang	JXNT	0.0045	0.005646	0.79	10618	10524	206339		Mbuti	Mongolia_Sukhbaatar_MLBA	LG	JXNT	0.0044	0.004231	1.046	28290	28041	553478
Mbuti	Russia_EarlyMedieval_Heshui_Mohe_1	Guanzhuang	LG	0.0046	0.00691	0.665	5790	5737	114030		Mbuti	China_AmurRiver_LPaleolithic	Guanzhuang	JXNT	0.0036	0.004111	0.874	16729	16609	329331		Mbuti	China_WLR_LN	LG	JXNT	0.0038	0.003594	1.048	40494	40191	792533
Mbuti	Mongolia_Khentii_LatEMedieval	Guanzhuang	LG	0.0026	0.003698	0.702	23881	23758	465725		Mbuti	China_WLR_LN	Guanzhuang	JXNT	0.0039	0.004374	0.899	20062	19905	389080		Mbuti	Miao	LG	JXNT	0.0034	0.003208	1.048	47094	46779	916722
Mbuti	Mongolia_Tuv_LatEMedieval	Guanzhuang	LG	0.0026	0.003544	0.726	24192	24068	470100		Mbuti	China_AR_IA	Guanzhuang	JXNT	0.0057	0.005596	1.011	8957	8856	173907		Mbuti	Kazakhstan_GoldenHordeAsian	LG	JXNT	0.0042	0.00386	1.084	44945	44570	878626
Mbuti	Mongolia_Sukhbaatar_MLBAXiongnuLatEMedieval_sister	Guanzhuang	LG	0.0104	0.013649	0.76	1490	1459	28454		Mbuti	Russia_Blagovechensk_IA	Guanzhuang	JXNT	0.0045	0.004396	1.016	20315	20134	394449		Mbuti	China_AR_EN	LG	JXNT	0.0051	0.004634	1.109	15945	15782	313480
Mbuti	Mongolia_Chalcolithic_Afanasievo_1	Guanzhuang	LG	0.0038	0.004606	0.835	16688	16561	340646		Mbuti	Mongolia_LBA_Ulaanzukh_2_dup	Guanzhuang	JXNT	0.0048	0.004654	1.037	20138	19944	391418		Mbuti	Mongolia_Selenge_XiongnuMedieval_o1	LG	JXNT	0.0057	0.005096	1.125	13555	13401	264603
Mbuti	China_AmurRiver_Mesolithic	Guanzhuang	LG	0.0046	0.004121	1.123	15105	14966	295926		Mbuti	Mongolia_Khentii_LatEMedieval	Guanzhuang	JXNT	0.004	0.00367	1.099	24185	23991	471185		Mbuti	Qihe3	LG	JXNT	0.005	0.004321	1.149	26450	26189	526570
Mbuti	Mongolia_EIA_Xiongnu_7	Guanzhuang	LG	0.0054	0.004564	1.189	17634	17444	342738		Mbuti	China_SEastAsia_Coastal_EN	Guanzhuang	JXNT	0.0052	0.004587	1.135	19097	18899	374863		Mbuti	China_AR_Xianbei_IA	LG	JXNT	0.0058	0.005062	1.153	12436	12291	243817
Mbuti	Mongolia_Uvurkhangai_EIALatEMedieval	Guanzhuang	LG	0.0047	0.003752	1.244	23958	23735	465427		Mbuti	China_AR_EN	Guanzhuang	JXNT	0.0043	0.003677	1.169	19542	19374	381653		Mbuti	Kazakhstan_Karluk_1	LG	JXNT	0.0045	0.003741	1.196	43460	43073	871984
Mbuti	Mongolia_EBA_Chemurchek_2	Guanzhuang	LG	0.0052	0.00402	1.284	20704	20491	419714		Mbuti	China_AR_Xianbei_IA	Guanzhuang	JXNT	0.0173	0.013795	1.253	1341	1296	26885		Mbuti	China_Upper_YR_LN	LG	JXNT	0.0037	0.002959	1.245	47861	47510	928267
Mbuti	Mongolia_Arkhangai_MLBAtoEIAorMedieval_o	Guanzhuang	LG	0.0101	0.007609	1.329	4712	4618	91633		Mbuti	China_AmurRiver_Mesolithic	Guanzhuang	JXNT	0.0048	0.003734	1.296	20320	20124	398090		Mbuti	Laos_BA	LG	JXNT	0.0073	0.005404	1.356	13259	13066	262575
Mbuti	Mongolia_Ulaanbaatar_EIALatEMedieval	Guanzhuang	LG	0.0078	0.00563	1.387	11600	11420	226353		Mbuti	China_WLR_MN	Guanzhuang	JXNT	0.005	0.003748	1.332	23765	23529	457508		Mbuti	Mongolia_Bulgan_LatEMedieval	LG	JXNT	0.0053	0.00393	1.36	35587	35209	696424
Mbuti	Mongolia_LBA_Ulaanzukh_2	Guanzhuang	LG	0.0057	0.003793	1.491	21420	21179	415737		Mbuti	Mongolia_EBA_Chemurchek_2	Guanzhuang	JXNT	0.0051	0.003704	1.381	20860	20647	423265		Mbuti	Russia_Buryatia_PreBronze	LG	JXNT	0.0052	0.003791	1.377	37226	36840	729908
Mbuti	China_AmurRiver_LPaleolithic	Guanzhuang	LG	0.0059	0.003937	1.498	20147	19910	394789		Mbuti	Russia_IA_EarlySarmatian	Guanzhuang	JXNT	0.0072	0.005128	1.412	14613	14403	283322		Mbuti	China_WLR_BA_o	LG	JXNT	0.0061	0.004322	1.419	33638	33228	656964
Mbuti	Kazakhstan_TianShan_Saka	Guanzhuang	LG	0.0177	0.011278	1.572	1858	1794	38030		Mbuti	China_NEastAsia_Inland_EN	Guanzhuang	JXNT	0.0047	0.003298	1.416	26346	26101	509079		Mbuti	Russia_Chita_BA	LG	JXNT	0.0113	0.007078	1.597	6648	6499	129923
Mbuti	China_NEastAsia_Inland_EN	Guanzhuang	LG	0.0078	0.004659	1.68	19004	18709	372129		Mbuti	Kazakhstan_IA_Saka_dup	Guanzhuang	JXNT	0.0119	0.008384	1.416	3851	3760	77382		Mbuti	Kazakhstan_IA_Saka_dup	LG	JXNT	0.013	0.007222	1.794	5795	5647	117467
Mbuti	Mongolia_Chalcolithic_Afanasievo_2	Guanzhuang	LG	0.009	0.004746	1.904	16062	15775	312132		Mbuti	China_AmurRiver_N	Guanzhuang	JXNT	0.0062	0.004097	1.511	15188	15001	297243		Mbuti	China_YR_MN	LG	JXNT	0.0057	0.002966	1.92	48190	47644	932258

## Sheet: G
Table S1G. QpAdm modeling of Guanzhuang populations generated in this study. We used the following populations as the outgroup: Mbuti.DG, ONG.SG, Russia_Ust_Ishim.DG, Russia_Kostenki14, Israel_Natufian_published, Italy_North_Villabruna_HG, Iran_GanjDareh_N, Turkey_N, Mixe.DG, Papuan.DG, Taiwan_Hanben_IA, and Shandong_EN. Well-fitted qpAdm models (P value ≥0.05, admixture proportion estimates betw…
A. One-way modeling of Guanzhuang population using the ancient East Asians
Target	Ref1	P value
Guanzhuang	China_YR_MN	0.546863
Guanzhuang	China_AR_Xianbei_IA	0.262811
Guanzhuang	China_YR_LN	0.226092
Guanzhuang	JXNT	0.183207
Guanzhuang	China_Upper_YR_LN	0.143543
Guanzhuang	China_Upper_YR_IA	0.127542
Guanzhuang	LG	0.120416
Guanzhuang	China_AR_IA	0.106168
Guanzhuang	China_WLR_BA	0.0903247
Guanzhuang	China_WLR_LN	0.0715241
Guanzhuang	China_Shimao_LN	0.0246781
Guanzhuang	China_Miaozigou_MN	0.0238246
Guanzhuang	China_AR_EN	0.0175157
Guanzhuang	Suogang	0.0105179
Guanzhuang	Dushan	0.00113761
Guanzhuang	GaoHuaHua	0.000336615
Guanzhuang	China_HMMH_MN	0.000202893
Guanzhuang	China_WLR_MN	0.000159481
Guanzhuang	Liangdao	0.00013461
Guanzhuang	Qihe3	0.000102712
Guanzhuang	Yiyang	8.35748e-05
Guanzhuang	LaCen	3.97376e-05
Guanzhuang	China_AmurRiver_EarlyN	1.21149e-05
Guanzhuang	China_AmurRiver_Mesolithic	9.665e-06
Guanzhuang	Boshan	9.14955e-07
Guanzhuang	Longlin	1.18311e-07
Guanzhuang	Tanshishan	5.85898e-08
Guanzhuang	BaBanQinCen	5.25492e-08
Guanzhuang	Yumin	1.16292e-10
Guanzhuang	China_AmurRiver_N	2.09003e-14
Guanzhuang	Xitoucun	7.24471e-18
Guanzhuang	Baojianshan	9.85958e-22
Guanzhuang	China_AmurRiver_Paleolithic	3.26548e-86
B. Two-way modeling of Guanzhuang (Using YR-related populations and Southeast Asian populations as sources )
Target	Ref1	Ref2	P value	Coeff1	Coeff2	std.err1	std.err2
Guanzhuang	China_YR_LN	Ami.DG	0.172496	0.978	0.022	0.068	0.068
Guanzhuang	China_YR_LN	Atayal.DG	0.1697	0.974	0.026	0.067	0.067
Guanzhuang	China_YR_LN	Tanshishan	0.00921327	0.887	0.113	0.16	0.16
Guanzhuang	China_YR_LN	Xitoucun	0.0872862	1.006	-0.006	0.097	0.097
Guanzhuang	China_YR_LN	Thai.DG	0.468649	0.778	0.222	0.107	0.107
Guanzhuang	China_YR_MN	Ami.DG	0.724206	0.887	0.113	0.066	0.066
Guanzhuang	China_YR_MN	Atayal.DG	0.723485	0.884	0.116	0.066	0.066
Guanzhuang	China_YR_MN	Tanshishan	0.294881	1.065	-0.065	0.153	0.153
Guanzhuang	China_YR_MN	Xitoucun	0.513064	1.015	-0.015	0.11	0.11
Guanzhuang	China_YR_MN	Thai.DG	0.556947	0.866	0.134	0.138	0.138
Guanzhuang	China_Upper_YR_LN	Ami.DG	0.312835	0.869	0.131	0.064	0.064
Guanzhuang	China_Upper_YR_LN	Atayal.DG	0.440798	0.842	0.158	0.064	0.064
Guanzhuang	China_Upper_YR_LN	Tanshishan	0.0495278	0.827	0.173	0.133	0.133
Guanzhuang	China_Upper_YR_LN	Xitoucun	0.132557	0.984	0.016	0.106	0.106
Guanzhuang	China_Upper_YR_LN	Thai.DG	0.127044	0.884	0.116	0.168	0.168
Guanzhuang	China_Upper_YR_IA	Ami.DG	0.109125	0.944	0.056	0.075	0.075
Guanzhuang	China_Upper_YR_IA	Atayal.DG	0.128891	0.928	0.072	0.075	0.075
Guanzhuang	China_Upper_YR_IA	Tanshishan	0.0351832	1.004	-0.004	0.181	0.181
Guanzhuang	China_Upper_YR_IA	Xitoucun	0.0183841	1.025	-0.025	0.129	0.129
Guanzhuang	China_Upper_YR_IA	Thai.DG	0.0948724	1.028	-0.028	0.237	0.237
Guanzhuang	JXNT	Ami.DG	0.184387	0.917	0.083	0.082	0.082
Guanzhuang	JXNT	Atayal.DG	0.202776	0.899	0.101	0.079	0.079
Guanzhuang	JXNT	Tanshishan	0.121465	0.927	0.073	0.176	0.176
Guanzhuang	JXNT	Xitoucun	0.0144977	1.002	-0.002	0.145	0.145
Guanzhuang	JXNT	Thai.DG	0.322206	0.744	0.256	0.138	0.138
Guanzhuang	LG	Ami.DG	0.116237	1.089	-0.089	0.102	0.102
Guanzhuang	LG	Atayal.DG	0.101317	1.07	-0.07	0.103	0.103
Guanzhuang	LG	Tanshishan	0.121498	1.002	-0.002	0.194	0.194
Guanzhuang	LG	Xitoucun	0.169854	1.094	-0.094	0.131	0.131
Guanzhuang	LG	Thai.DG	0.154315	0.794	0.206	0.16	0.16
C. Two-way modeling of Guanzhuang (Using YR-related populations and Eurasian steppe-related populations including West Eurasian-related populations as sources )
Target	Ref1	Ref2	P value	Coeff1	Coeff2	std.err1	std.err2
Guanzhuang	China_YR_LN	Kazakhstan_Kangju.SG	0.478747	1.008	-0.008	0.028	0.028
Guanzhuang	China_YR_LN	Mongolia_EBA_Chemurchek_2	0.337331	1.004	-0.004	0.022	0.022
Guanzhuang	China_YR_LN	Kyrgyzstan_TianShan_Hun.SG	0.260548	1.011	-0.011	0.025	0.025
Guanzhuang	China_YR_LN	Russia_Sarmatian.SG	0.256237	1.009	-0.009	0.019	0.019
Guanzhuang	China_YR_LN	Kazakhstan_Sarmatian_IA	0.263604	1.008	-0.008	0.018	0.018
Guanzhuang	China_YR_LN	Russia_MLBA_Sintashta	0.26757	1.009	-0.009	0.016	0.016
Guanzhuang	China_YR_LN	Russia_Tagar.SG	0.263711	1.009	-0.009	0.02	0.02
Guanzhuang	China_YR_LN	Russia_Samara_EBA_Yamnaya	0.245667	1.007	-0.007	0.017	0.017
Guanzhuang	China_YR_LN	Hungary_IA_Scythian.SG	0.240499	1.015	-0.015	0.017	0.017
Guanzhuang	China_YR_LN	Mongolia_Sukhbaatar_MLBAXiongnuLatEMedieval	0.245139	0.973	0.027	0.145	0.145
Guanzhuang	China_YR_LN	Mongolia_Bulgan_EarlyMedieval	0.147592	1.004	-0.004	0.141	0.141
Guanzhuang	China_YR_LN	Mongolia_Bulgan_Xiongnu	0.222976	0.95	0.05	0.123	0.123
Guanzhuang	China_YR_LN	Mongolia_LBA_Khovsgol_6	0.253274	1.001	-0.001	0.059	0.059
Guanzhuang	China_YR_MN	Kazakhstan_Kangju.SG	0.564098	1.014	-0.014	0.031	0.031
Guanzhuang	China_YR_MN	Mongolia_EBA_Chemurchek_2	0.791374	1.035	-0.035	0.026	0.026
Guanzhuang	China_YR_MN	Kyrgyzstan_TianShan_Hun.SG	0.888298	1.05	-0.05	0.029	0.029
Guanzhuang	China_YR_MN	Russia_Sarmatian.SG	0.954145	1.039	-0.039	0.022	0.022
Guanzhuang	China_YR_MN	Kazakhstan_Sarmatian_IA	0.894064	1.036	-0.036	0.022	0.022
Guanzhuang	China_YR_MN	Russia_MLBA_Sintashta	0.899573	1.033	-0.033	0.019	0.019
Guanzhuang	China_YR_MN	Russia_Tagar.SG	0.865778	1.041	-0.041	0.024	0.024
Guanzhuang	LG	Kazakhstan_Kangju.SG	0.784672	0.965	0.035	0.032	0.032
Guanzhuang	LG	Mongolia_EBA_Chemurchek_2	0.0975913	0.963	0.037	0.027	0.027
Guanzhuang	LG	Kyrgyzstan_TianShan_Hun.SG	0.054871	0.979	0.021	0.03	0.03
Guanzhuang	LG	Russia_Sarmatian.SG	0.0484439	0.983	0.017	0.023	0.023
Guanzhuang	LG	Kazakhstan_Sarmatian_IA	0.054603	0.983	0.017	0.023	0.023
Guanzhuang	LG	Russia_MLBA_Sintashta	0.0520992	0.987	0.013	0.02	0.02
Guanzhuang	LG	Russia_Tagar.SG	0.048738	0.981	0.019	0.025	0.025
Guanzhuang	LG	Russia_Samara_EBA_Yamnaya	0.0533704	0.983	0.017	0.021	0.021
Guanzhuang	LG	Hungary_IA_Scythian.SG	0.125645	0.997	0.003	0.02	0.02
Guanzhuang	LG	Mongolia_Sukhbaatar_MLBAXiongnuLatEMedieval	0.0697773	0.827	0.173	0.163	0.163
Guanzhuang	LG	Mongolia_Bulgan_EarlyMedieval	0.0628833	0.938	0.062	0.186	0.186
Guanzhuang	LG	Mongolia_Bulgan_Xiongnu	0.0816254	0.816	0.184	0.15	0.15
Guanzhuang	LG	Mongolia_LBA_Khovsgol_6	0.0737681	0.922	0.078	0.069	0.069
D. Three-way modeling of Guanzhuang (Using YR-related populations, Southeast Asian populations, and Eurasian steppe-related populations as sources )
Target	Ref1	Ref2	Ref3	P value	Coeff1	Coeff2	Coeff3	std.err1	std.err2	std.err3
Guanzhuang	China_YR_LN	Ami.DG	Kazakhstan_Kangju.SG	0.173196	0.957	0.033	0.01	0.16	0.14	0.029
Guanzhuang	China_YR_LN	Ami.DG	Mongolia_EBA_Chemurchek_2	0.229087	0.941	0.046	0.014	0.088	0.076	0.021
Guanzhuang	China_YR_LN	Atayal.DG	Kazakhstan_Kangju.SG	0.176481	0.953	0.036	0.011	0.133	0.12	0.026
Guanzhuang	China_YR_LN	Atayal.DG	Mongolia_EBA_Chemurchek_2	0.232738	0.93	0.054	0.016	0.088	0.075	0.022
Guanzhuang	China_YR_MN	Ami.DG	Kazakhstan_Kangju.SG	0.225276	0.73	0.236	0.034	0.119	0.105	0.027
Guanzhuang	China_YR_MN	Ami.DG	Mongolia_EBA_Chemurchek_2	0.650597	0.902	0.108	-0.01	0.092	0.076	0.025
Guanzhuang	China_YR_MN	Atayal.DG	Kazakhstan_Kangju.SG	0.178336	0.781	0.193	0.026	0.109	0.097	0.016
Guanzhuang	China_YR_MN	Atayal.DG	Mongolia_EBA_Chemurchek_2	0.656023	0.894	0.113	-0.007	0.094	0.078	0.026
Guanzhuang	China_Upper_YR_LN	Ami.DG	Kazakhstan_Kangju.SG	0.614105	0.892	0.104	0.004	0.133	0.115	0.03
Guanzhuang	China_Upper_YR_LN	Ami.DG	Mongolia_EBA_Chemurchek_2	0.295771	0.932	0.1	-0.032	0.092	0.075	0.027
Guanzhuang	China_Upper_YR_LN	Atayal.DG	Kazakhstan_Kangju.SG	0.649437	0.887	0.112	0.001	0.116	0.102	0.027
Guanzhuang	China_Upper_YR_LN	Atayal.DG	Mongolia_EBA_Chemurchek_2	0.38412	0.893	0.131	-0.025	0.094	0.076	0.027
Guanzhuang	China_Upper_YR_IA	Ami.DG	Kazakhstan_Kangju.SG	0.26243	1.013	0.032	-0.045	0.189	0.156	0.044
Guanzhuang	China_Upper_YR_IA	Ami.DG	Mongolia_EBA_Chemurchek_2	0.204172	1.093	-0.033	-0.06	0.126	0.102	0.033
Guanzhuang	China_Upper_YR_IA	Atayal.DG	Kazakhstan_Kangju.SG	0.253786	1.034	0.013	-0.047	0.166	0.139	0.04
Guanzhuang	China_Upper_YR_IA	Atayal.DG	Mongolia_EBA_Chemurchek_2	0.204789	1.082	-0.024	-0.059	0.131	0.105	0.035
Guanzhuang	JXNT	Ami.DG	Kazakhstan_Kangju.SG	0.129567	0.944	0.053	0.003	0.214	0.187	0.039
Guanzhuang	JXNT	Ami.DG	Mongolia_EBA_Chemurchek_2	0.199258	0.908	0.083	0.009	0.112	0.095	0.028
Guanzhuang	JXNT	Atayal.DG	Kazakhstan_Kangju.SG	0.122275	0.908	0.085	0.006	0.182	0.162	0.034
Guanzhuang	JXNT	Atayal.DG	Mongolia_EBA_Chemurchek_2	0.233167	0.866	0.118	0.016	0.111	0.092	0.028
Guanzhuang	LG	Ami.DG	Kazakhstan_Kangju.SG	0.580268	0.983	-0.034	0.051	0.184	0.167	0.032
Guanzhuang	LG	Ami.DG	Mongolia_EBA_Chemurchek_2	0.126411	1.018	-0.044	0.025	0.135	0.118	0.027
Guanzhuang	LG	Atayal.DG	Kazakhstan_Kangju.SG	0.573888	0.967	-0.022	0.055	0.149	0.139	0.029
Guanzhuang	LG	Atayal.DG	Mongolia_EBA_Chemurchek_2	0.121636	0.984	-0.013	0.029	0.136	0.118	0.028
E. Two-way modeling of Guanzhuang (Using YR-related populations and ANA-related populations as sources )
Target	Ref1	Ref2	P value	Coeff1	Coeff2	std.err1	std.err2
Guanzhuang	China_YR_LN	China_AR_EN	0.631075	1.633	-0.633	0.438	0.438
Guanzhuang	China_YR_LN	Russia_DevilsCave_N.SG	0.182452	1.091	-0.091	0.228	0.228
Guanzhuang	China_YR_LN	Mongolia_North_N	0.144402	1.003	-0.003	0.119	0.119
Guanzhuang	China_YR_LN	Mongolia_East_N	0.260963	1.033	-0.033	0.146	0.146
Guanzhuang	China_YR_MN	China_AR_EN	0.528936	1.586	-0.586	0.583	0.583
Guanzhuang	China_YR_MN	Russia_DevilsCave_N.SG	0.857697	1.479	-0.479	0.314	0.314
Guanzhuang	China_YR_MN	Mongolia_North_N	0.875948	1.337	-0.337	0.201	0.201
Guanzhuang	China_YR_MN	Mongolia_East_N	0.780445	1.378	-0.378	0.255	0.255
Guanzhuang	China_YR_LBIA	China_AR_EN	0.502297	0.901	0.099	0.398	0.398
Guanzhuang	China_YR_LBIA	Russia_DevilsCave_N.SG	0.332922	0.92	0.08	0.248	0.248
Guanzhuang	China_YR_LBIA	Mongolia_North_N	0.344819	0.935	0.065	0.158	0.158
Guanzhuang	China_YR_LBIA	Mongolia_East_N	0.391407	0.873	0.127	0.171	0.171
Guanzhuang	China_Upper_YR_IA	China_AR_EN	0.630437	1.384	-0.384	0.43	0.43
Guanzhuang	China_Upper_YR_IA	Russia_DevilsCave_N.SG	0.182978	1.401	-0.401	0.417	0.417
Guanzhuang	China_Upper_YR_IA	Mongolia_North_N	0.145285	1.173	-0.173	0.193	0.193
Guanzhuang	China_Upper_YR_IA	Mongolia_East_N	0.122432	1.189	-0.189	0.245	0.245
Guanzhuang	China_Shimao_LN	China_AR_EN	0.419741	1.465	-0.465	0.762	0.762
Guanzhuang	China_Shimao_LN	Russia_DevilsCave_N.SG	0.293901	2.343	-1.343	0.96	0.96
Guanzhuang	China_Shimao_LN	Mongolia_North_N	0.102644	1.549	-0.549	0.328	0.328
Guanzhuang	China_Shimao_LN	Mongolia_East_N	0.134581	1.666	-0.666	0.462	0.462
Guanzhuang	JXNT	China_AR_EN	0.0372507	1.29	-0.29	1.042	1.042
Guanzhuang	JXNT	Russia_DevilsCave_N.SG	0.19537	1.312	-0.312	0.442	0.442
Guanzhuang	JXNT	Mongolia_North_N	0.170562	1.122	-0.122	0.193	0.193
Guanzhuang	JXNT	Mongolia_East_N	0.223233	1.155	-0.155	0.253	0.253
Guanzhuang	LG	China_AR_EN	0.250318	0.707	0.293	0.37	0.37
Guanzhuang	LG	Russia_DevilsCave_N.SG	0.0996241	0.859	0.141	0.254	0.254
Guanzhuang	LG	Mongolia_North_N	0.116874	0.869	0.131	0.131	0.131
Guanzhuang	LG	Mongolia_East_N	0.301359	0.812	0.188	0.189	0.189

## Sheet: H
Table S1H. QpAdm modeling of the Guanzhuang outlier generated in this study. We used the following populations as the base outgroup: Mbuti.DG, ONG.SG, Russia_Ust_Ishim.DG, Russia_Kostenki14, Israel_Natufian_published, Italy_North_Villabruna_HG, Iran_GanjDareh_N, Turkey_N, Mixe.DG, Papuan.DG, Ami.DG, and China_Tianyuan. Well-fitted qpAdm models (P value ≥0.05, admixture proportion estimates betwee…
A. One-way modeling of Guanzhuang outlier using the ancient East Asians
Target	Ref1	P value
Guanzhuang_o	China_HMMH_MN	0.774707
Guanzhuang_o	China_AR_EN	0.603199
Guanzhuang_o	China_Shimao_LN	0.602748
Guanzhuang_o	China_WLR_BA	0.599337
Guanzhuang_o	China_WLR_LN	0.594945
Guanzhuang_o	China_AR_IA	0.578465
Guanzhuang_o	Dushan	0.544593
Guanzhuang_o	Suogang	0.439183
Guanzhuang_o	Boshan	0.426094
Guanzhuang_o	China_Upper_YR_LN	0.407175
Guanzhuang_o	Yiyang	0.386589
Guanzhuang_o	Qihe3	0.386029
Guanzhuang_o	Baojianshan	0.385403
Guanzhuang_o	Longlin	0.338081
Guanzhuang_o	China_Upper_YR_IA	0.30358
Guanzhuang_o	China_YR_LN	0.260648
Guanzhuang_o	China_WLR_MN	0.253412
Guanzhuang_o	LaCen	0.213938
Guanzhuang_o	GaoHuaHua	0.21054
Guanzhuang_o	Yumin	0.170561
Guanzhuang_o	Liangdao	0.139271
Guanzhuang_o	China_AR_Xianbei_IA	0.136642
Guanzhuang_o	China_AmurRiver_N	0.127722
Guanzhuang_o	China_AmurRiver_Mesolithic	0.124595
Guanzhuang_o	China_YR_MN	0.11343
Guanzhuang_o	LG	0.08238
Guanzhuang_o	China_Miaozigou_MN	0.0547606
Guanzhuang_o	JXNT	0.0250253
Guanzhuang_o	Tanshishan	0.0242548
Guanzhuang_o	Taiwan_Hanben_IA	0.0179312
Guanzhuang_o	China_AmurRiver_EarlyN	0.00999269
Guanzhuang_o	BaBanQinCen	0.00571889
Guanzhuang_o	China_AmurRiver_Paleolithic	8.67896e-05
B. Outgroup = Base, using YR-related populations and ANA-related populations as sources									E. Outgroup=base + Shandong_EN, using YR-related populations and ANA-related populations as sources									F. Outgroup=base + AR_EN, using YR-related populations and ANA-related populations as sources									G. Outgroup=base + YR_MN, using YR-related populations and ANA-related populations as sources
Target	Ref1	Ref2	P value	Coeff1	Coeff2	std.err1	std.err2		Target	Ref1	Ref2	P value	Coeff1	Coeff2	std.err1	std.err2		Target	Ref1	Ref2	P value	Coeff1	Coeff2	std.err1	std.err2		Target	Ref1	Ref2	P value	Coeff1	Coeff2	std.err1	std.err2
Guanzhuang_o	JXNT	China_AR_EN	0.986262	0.485	0.515	0.392	0.392		Guanzhuang_o	China_Shimao_LN	China_AR_EN	0.949373	0.583	0.417	0.378	0.378		Guanzhuang_o	China_Shimao_LN	China_AR_IA	0.694831	11.068	-10.068	139.415	139.415		Guanzhuang_o	China_Shimao_LN	China_AR_EN	0.357211	0.78	0.22	0.699	0.699
Guanzhuang_o	JXNT	China_AR_IA	0.481506	0.118	0.882	1.687	1.687		Guanzhuang_o	China_Shimao_LN	China_AR_IA	0.842353	1.622	-0.622	0.424	0.424		Guanzhuang_o	China_Shimao_LN	China_WLR_BA	0.486848	0.485	0.515	4.893	4.893		Guanzhuang_o	China_Shimao_LN	China_AR_IA	0.848927	1.366	-0.366	0.318	0.318
Guanzhuang_o	JXNT	China_WLR_BA	0.68838	-0.495	1.495	1.217	1.217		Guanzhuang_o	China_Shimao_LN	China_WLR_BA	0.531692	2.504	-1.504	5.563	5.563		Guanzhuang_o	China_Shimao_LN	China_WLR_MN	0.643311	1.045	-0.045	0.617	0.617		Guanzhuang_o	China_Shimao_LN	China_WLR_BA	0.750526	2.452	-1.452	2.892	2.892
Guanzhuang_o	JXNT	China_WLR_MN	0.260904	-0.581	1.581	6.117	6.117		Guanzhuang_o	China_Shimao_LN	China_WLR_MN	0.568568	-16.561	17.561	1012.23	1012.23		Guanzhuang_o	China_Shimao_LN	China_WLR_LN	0.790987	2.083	-1.083	9.116	9.116		Guanzhuang_o	China_Shimao_LN	China_WLR_MN	0.579572	7.479	-6.479	4.691	4.691
Guanzhuang_o	JXNT	China_WLR_LN	0.753244	-0.627	1.627	1.155	1.155		Guanzhuang_o	China_Shimao_LN	China_WLR_LN	0.594556	0.512	0.488	0.712	0.712		Guanzhuang_o	China_Shimao_LN	China_AmurRiver_N	0.611978	1.407	-0.407	1.217	1.217		Guanzhuang_o	China_Shimao_LN	China_WLR_LN	0.869755	0.495	0.505	0.551	0.551
Guanzhuang_o	JXNT	China_AmurRiver_N	0.205143	0.015	0.985	0.877	0.877		Guanzhuang_o	China_Shimao_LN	China_AmurRiver_N	0.538969	0.999	0.001	0.596	0.596		Guanzhuang_o	China_Shimao_LN	China_AmurRiver_Mesolithic	0.648334	-5.898	6.898	932.661	932.661		Guanzhuang_o	China_Shimao_LN	China_AmurRiver_N	0.510679	0.984	0.016	0.747	0.747
Guanzhuang_o	JXNT	China_AmurRiver_Mesolithic	0.226687	-1.546	2.546	2.384	2.384		Guanzhuang_o	China_Shimao_LN	China_AmurRiver_Mesolithic	0.725332	21.331	-20.331	2034.43	2034.43		Guanzhuang_o	China_Shimao_LN	China_AmurRiver_Paleolithic	0.571776	1.075	-0.075	0.201	0.201		Guanzhuang_o	China_Shimao_LN	China_AmurRiver_Mesolithic	0.753744	8.678	-7.678	40.952	40.952
Guanzhuang_o	JXNT	China_AmurRiver_Paleolithic	0.0531234	1.038	-0.038	0.227	0.227		Guanzhuang_o	China_Shimao_LN	China_AmurRiver_Paleolithic	0.567863	1.075	-0.075	0.159	0.159		Guanzhuang_o	China_Shimao_LN	Ulchi.DG	0.714593	2.145	-1.145	5.294	5.294		Guanzhuang_o	China_Shimao_LN	China_AmurRiver_Paleolithic	0.671465	1.016	-0.016	0.122	0.122
Guanzhuang_o	JXNT	Ulchi.DG	0.448768	-10.023	11.023	395.145	395.145		Guanzhuang_o	China_Shimao_LN	Ulchi.DG	0.44696	0.913	0.087	0.602	0.602		Guanzhuang_o	China_Shimao_LN	Oroqen.DG	0.573492	1.257	-0.257	0.764	0.764		Guanzhuang_o	China_Shimao_LN	Ulchi.DG	0.642782	0.833	0.167	0.401	0.401
Guanzhuang_o	JXNT	Oroqen.DG	0.525659	-2.057	3.057	5.28	5.28		Guanzhuang_o	China_Shimao_LN	Oroqen.DG	0.44818	1.235	-0.235	1.041	1.041		Guanzhuang_o	China_Shimao_LN	Hezhen.SDG	0.553972	1.208	-0.208	0.848	0.848		Guanzhuang_o	China_Shimao_LN	Oroqen.DG	0.634678	0.805	0.195	0.572	0.572
Guanzhuang_o	JXNT	Hezhen.SDG	0.348701	-1.685	2.685	3.721	3.721		Guanzhuang_o	China_Shimao_LN	Hezhen.SDG	0.471235	1.264	-0.264	1.199	1.199		Guanzhuang_o	JXNT	China_AR_IA	0.878321	-0.006	1.006	83.776	83.776		Guanzhuang_o	China_Shimao_LN	Hezhen.SDG	0.631014	0.87	0.13	0.671	0.671
Guanzhuang_o	LG	China_AR_EN	0.886198	-7.312	8.312	49.271	49.271		Guanzhuang_o	JXNT	China_AR_EN	0.991169	0.454	0.546	0.271	0.271		Guanzhuang_o	JXNT	China_WLR_BA	0.776149	0.541	0.459	1.909	1.909		Guanzhuang_o	JXNT	China_AR_EN	0.743659	1.878	-0.878	1.482	1.482
Guanzhuang_o	LG	China_AR_IA	0.629213	3.2	-2.2	5.072	5.072		Guanzhuang_o	JXNT	China_AR_IA	0.565856	0.073	0.927	0.584	0.584		Guanzhuang_o	JXNT	China_WLR_MN	0.987713	1.499	-0.499	0.59	0.59		Guanzhuang_o	JXNT	China_AR_IA	0.541424	0.097	0.903	1.936	1.936
Guanzhuang_o	LG	China_WLR_BA	0.698657	-0.167	1.167	0.502	0.502		Guanzhuang_o	JXNT	China_WLR_BA	0.706109	-0.582	1.582	0.899	0.899		Guanzhuang_o	JXNT	China_WLR_LN	0.872782	2.777	-1.777	21.348	21.348		Guanzhuang_o	JXNT	China_WLR_BA	0.75797	-0.519	1.519	1.188	1.188
Guanzhuang_o	LG	China_WLR_MN	0.306459	0.402	0.598	0.723	0.723		Guanzhuang_o	JXNT	China_WLR_MN	0.44497	-1.666	2.666	5.16	5.16		Guanzhuang_o	JXNT	China_AmurRiver_N	0.875311	1.195	-0.195	0.77	0.77		Guanzhuang_o	JXNT	China_WLR_MN	0.298025	-1.134	2.134	8.15	8.15
Guanzhuang_o	LG	China_WLR_LN	0.689848	-0.536	1.536	1.311	1.311		Guanzhuang_o	JXNT	China_WLR_LN	0.818174	-1.238	2.238	1.646	1.646		Guanzhuang_o	JXNT	China_AmurRiver_Mesolithic	0.992553	5.506	-4.506	13.304	13.304		Guanzhuang_o	JXNT	China_WLR_LN	0.813898	-0.569	1.569	1.035	1.035
Guanzhuang_o	LG	China_AmurRiver_N	0.215664	-0.002	1.002	0.414	0.414		Guanzhuang_o	JXNT	China_AmurRiver_N	0.19241	0.035	0.965	0.814	0.814		Guanzhuang_o	JXNT	China_AmurRiver_Paleolithic	0.907116	0.957	0.043	0.144	0.144		Guanzhuang_o	JXNT	China_AmurRiver_N	0.257591	0.031	0.969	0.946	0.946
Guanzhuang_o	LG	China_AmurRiver_Mesolithic	0.189008	-1.566	2.566	1.45	1.45		Guanzhuang_o	JXNT	China_AmurRiver_Mesolithic	0.354499	-1.471	2.471	2.039	2.039		Guanzhuang_o	JXNT	Ulchi.DG	0.9883	2.427	-1.427	1.884	1.884		Guanzhuang_o	JXNT	China_AmurRiver_Mesolithic	0.276139	-1.916	2.916	2.649	2.649
Guanzhuang_o	LG	China_AmurRiver_Paleolithic	0.0754026	1.058	-0.058	0.342	0.342		Guanzhuang_o	JXNT	China_AmurRiver_Paleolithic	0.0361448	1.075	-0.075	0.237	0.237		Guanzhuang_o	JXNT	Oroqen.DG	0.951106	1.607	-0.607	1.109	1.109		Guanzhuang_o	JXNT	China_AmurRiver_Paleolithic	0.0778631	1.017	-0.017	0.173	0.173
Guanzhuang_o	LG	Ulchi.DG	0.197835	0.564	0.436	0.381	0.381		Guanzhuang_o	JXNT	Ulchi.DG	0.637509	-3.963	4.963	7.578	7.578		Guanzhuang_o	JXNT	Hezhen.SDG	0.906766	1.311	-0.311	1.497	1.497		Guanzhuang_o	JXNT	Ulchi.DG	0.533386	-8.468	9.468	79.187	79.187
Guanzhuang_o	LG	Oroqen.DG	0.14345	0.452	0.548	27.611	27.611		Guanzhuang_o	JXNT	Oroqen.DG	0.622157	-5.59	6.59	14.071	14.071		Guanzhuang_o	LG	China_AR_IA	0.882215	-0.013	1.013	2.235	2.235		Guanzhuang_o	JXNT	Oroqen.DG	0.522006	-1.728	2.728	5.613	5.613
Guanzhuang_o	LG	Hezhen.SDG	0.162654	0.388	0.612	0.979	0.979		Guanzhuang_o	JXNT	Hezhen.SDG	0.564574	-3.2	4.2	4.486	4.486		Guanzhuang_o	LG	China_WLR_BA	0.395291	0.947	0.053	4.089	4.089		Guanzhuang_o	JXNT	Hezhen.SDG	0.406637	-1.4	2.4	3.193	3.193
Guanzhuang_o	China_Shimao_LN	China_AR_EN	0.978071	0.483	0.517	0.29	0.29		Guanzhuang_o	LG	China_AR_EN	0.572998	-0.888	1.888	3	3		Guanzhuang_o	LG	China_WLR_MN	0.579136	1.26	-0.26	0.459	0.459		Guanzhuang_o	LG	China_AR_EN	0.784308	4.274	-3.274	11.713	11.713
Guanzhuang_o	China_Shimao_LN	China_AR_IA	0.858777	1.608	-0.608	0.562	0.562		Guanzhuang_o	LG	China_AR_IA	0.633915	2.504	-1.504	2.239	2.239		Guanzhuang_o	LG	China_WLR_LN	0.741455	0.649	0.351	2.836	2.836		Guanzhuang_o	LG	China_AR_IA	0.69918	3.185	-2.185	3.655	3.655
Guanzhuang_o	China_Shimao_LN	China_WLR_BA	0.673541	2.469	-1.469	2.804	2.804		Guanzhuang_o	LG	China_WLR_BA	0.754263	-0.233	1.233	0.487	0.487		Guanzhuang_o	LG	China_AmurRiver_N	0.402769	0.893	0.107	0.384	0.384		Guanzhuang_o	LG	China_WLR_BA	0.610919	-0.216	1.216	0.607	0.607
Guanzhuang_o	China_Shimao_LN	China_WLR_MN	0.498076	11.611	-10.611	1315.92	1315.92		Guanzhuang_o	LG	China_WLR_MN	0.320538	0.252	0.748	0.885	0.885		Guanzhuang_o	LG	China_AmurRiver_Mesolithic	0.27416	-0.86	1.86	1.377	1.377		Guanzhuang_o	LG	China_WLR_MN	0.257975	0.445	0.555	0.647	0.647
Guanzhuang_o	China_Shimao_LN	China_WLR_LN	0.812327	0.5	0.5	0.476	0.476		Guanzhuang_o	LG	China_WLR_LN	0.67811	-0.808	1.808	1.183	1.183		Guanzhuang_o	LG	China_AmurRiver_Paleolithic	0.507932	1.063	-0.063	0.332	0.332		Guanzhuang_o	LG	China_WLR_LN	0.765751	-0.576	1.576	1.222	1.222
Guanzhuang_o	China_Shimao_LN	China_AmurRiver_N	0.453939	1.051	-0.051	0.75	0.75		Guanzhuang_o	LG	China_AmurRiver_N	0.242858	0.104	0.896	0.485	0.485		Guanzhuang_o	LG	Ulchi.DG	0.507179	0.902	0.098	0.401	0.401		Guanzhuang_o	LG	China_AmurRiver_N	0.210417	-0.105	1.105	0.403	0.403
Guanzhuang_o	China_Shimao_LN	China_AmurRiver_Mesolithic	0.696616	6.755	-5.755	22.407	22.407		Guanzhuang_o	LG	China_AmurRiver_Mesolithic	0.237642	-1.673	2.673	1.591	1.591		Guanzhuang_o	LG	Oroqen.DG	0.535119	1.236	-0.236	0.528	0.528		Guanzhuang_o	LG	China_AmurRiver_Mesolithic	0.249338	-1.56	2.56	1.348	1.348
Guanzhuang_o	China_Shimao_LN	China_AmurRiver_Paleolithic	0.659245	1.088	-0.088	0.161	0.161		Guanzhuang_o	LG	China_AmurRiver_Paleolithic	0.0755671	1.134	-0.134	0.302	0.302		Guanzhuang_o	LG	Hezhen.SDG	0.473988	1.123	-0.123	0.76	0.76		Guanzhuang_o	LG	China_AmurRiver_Paleolithic	0.0715159	0.891	0.109	0.173	0.173
Guanzhuang_o	China_Shimao_LN	Ulchi.DG	0.569462	0.856	0.144	0.431	0.431		Guanzhuang_o	LG	Ulchi.DG	0.186782	0.495	0.505	0.481	0.481											Guanzhuang_o	LG	Ulchi.DG	0.231207	0.505	0.495	0.667	0.667
Guanzhuang_o	China_Shimao_LN	Oroqen.DG	0.55215	0.868	0.132	0.764	0.764		Guanzhuang_o	LG	Oroqen.DG	0.197798	4.351	-3.351	21.985	21.985											Guanzhuang_o	LG	Oroqen.DG	0.222692	-0.103	1.103	2.957	2.957
Guanzhuang_o	China_Shimao_LN	Hezhen.SDG	0.560312	0.947	0.053	0.828	0.828		Guanzhuang_o	LG	Hezhen.SDG	0.10221	0.684	0.316	2.322	2.322											Guanzhuang_o	LG	Hezhen.SDG	0.204165	0.281	0.719	0.803	0.803
C. Outgroup = Base, using YR-related populations and Southeast Asian populations as sources									H. Outgroup = Base + Shandong_EN, using YR-related populations and Southeast Asian populations as sources									I. Outgroup = Base + AR_EN, using YR-related populations and Southeast Asian populations as sources									J. Outgroup = Base + YR_MN, using YR-related populations and Southeast Asian populations as sources
Target	Ref1	Ref2	P value	Coeff1	Coeff2	std.err1	std.err2		Target	Ref1	Ref2	P value	Coeff1	Coeff2	std.err1	std.err2		Target	Ref1	Ref2	P value	Coeff1	Coeff2	std.err1	std.err2		Target	Ref1	Ref2	P value	Coeff1	Coeff2	std.err1	std.err2
Guanzhuang_o	China_YR_LN	Atayal.DG	0.412799	1.383	-0.383	0.705	0.705		Guanzhuang_o	China_YR_LN	Atayal.DG	0.47128	1.524	-0.524	0.96	0.96		Guanzhuang_o	China_YR_LN	Atayal.DG	0.625209	-4957.81	4958.81	103397	103397		Guanzhuang_o	China_YR_MN	Atayal.DG	0.198597	-19.09	20.09	4635.35	4635.35
Guanzhuang_o	China_YR_LN	Tanshishan	0.79072	4.452	-3.452	4.414	4.414		Guanzhuang_o	China_YR_LN	Tanshishan	0.87132	4.589	-3.589	4.376	4.376		Guanzhuang_o	China_YR_LN	Tanshishan	0.774789	0.351	0.649	3.209	3.209		Guanzhuang_o	China_YR_MN	Tanshishan	0.410581	-8.537	9.537	26.269	26.269
Guanzhuang_o	China_YR_LN	Xitoucun	0.951368	-0.928	1.928	1.944	1.944		Guanzhuang_o	China_YR_LN	Xitoucun	0.939118	-0.635	1.635	2.04	2.04		Guanzhuang_o	China_YR_LN	Xitoucun	0.260579	-3.741	4.741	1183.25	1183.25		Guanzhuang_o	China_YR_MN	Xitoucun	0.911026	-0.132	1.132	0.519	0.519
Guanzhuang_o	China_YR_LN	Thai.DG	0.762033	3.132	-2.132	2.524	2.524		Guanzhuang_o	China_YR_LN	Thai.DG	0.743274	2.588	-1.588	2.311	2.311		Guanzhuang_o	China_YR_LN	Thai.DG	0.40758	0.175	0.825	41.014	41.014		Guanzhuang_o	China_YR_MN	Thai.DG	0.0969866	0.715	0.285	102.389	102.389
Guanzhuang_o	China_YR_MN	Atayal.DG	0.289182	4.437	-3.437	21.051	21.051		Guanzhuang_o	China_YR_MN	Atayal.DG	0.398822	23.204	-22.204	4698.24	4698.24		Guanzhuang_o	China_YR_MN	Atayal.DG	0.274151	-0.257	1.257	6.198	6.198		Guanzhuang_o	China_Shimao_LN	Atayal.DG	0.815056	1.606	-0.606	0.925	0.925
Guanzhuang_o	China_YR_MN	Tanshishan	0.613409	12.174	-11.174	78.342	78.342		Guanzhuang_o	China_YR_MN	Tanshishan	0.699137	10.16	-9.16	48.373	48.373		Guanzhuang_o	China_YR_MN	Tanshishan	0.801782	0.539	0.461	1.644	1.644		Guanzhuang_o	China_Shimao_LN	Tanshishan	0.125484	0.723	0.277	811.406	811.406
Guanzhuang_o	China_YR_MN	Xitoucun	0.940737	-0.358	1.358	0.607	0.607		Guanzhuang_o	China_YR_MN	Xitoucun	0.94208	-0.312	1.312	0.598	0.598		Guanzhuang_o	China_YR_MN	Xitoucun	0.355036	-0.714	1.714	1.112	1.112		Guanzhuang_o	China_Shimao_LN	Xitoucun	0.926221	-0.236	1.236	0.661	0.661
Guanzhuang_o	China_YR_MN	Thai.DG	0.302952	2.576	-1.576	4.51	4.51		Guanzhuang_o	China_YR_MN	Thai.DG	0.315613	3.586	-2.586	5.6	5.6		Guanzhuang_o	China_YR_MN	Thai.DG	0.450046	-0.167	1.167	0.357	0.357		Guanzhuang_o	China_Shimao_LN	Thai.DG	0.624537	0.893	0.107	0.375	0.375
Guanzhuang_o	China_Shimao_LN	Atayal.DG	0.838676	1.795	-0.795	1.057	1.057		Guanzhuang_o	China_Shimao_LN	Atayal.DG	0.864802	2.455	-1.455	2.062	2.062		Guanzhuang_o	China_Shimao_LN	Atayal.DG	0.648738	0.901	0.099	0.849	0.849		Guanzhuang_o	China_Upper_YR_IA	Atayal.DG	0.640578	2.48	-1.48	2.408	2.408
Guanzhuang_o	China_Shimao_LN	Tanshishan	0.234023	0.863	0.137	5.658	5.658		Guanzhuang_o	China_Shimao_LN	Tanshishan	0.262003	0.897	0.103	18.799	18.799		Guanzhuang_o	China_Shimao_LN	Tanshishan	0.733646	0.038	0.962	0.257	0.257		Guanzhuang_o	China_Upper_YR_IA	Tanshishan	0.617752	20.266	-19.266	497.705	497.705
Guanzhuang_o	China_Shimao_LN	Xitoucun	0.943056	-0.305	1.305	0.784	0.784		Guanzhuang_o	China_Shimao_LN	Xitoucun	0.956704	-0.31	1.31	0.74	0.74		Guanzhuang_o	China_Shimao_LN	Xitoucun	0.644293	-45.58	46.58	12438	12438		Guanzhuang_o	China_Upper_YR_IA	Xitoucun	0.86095	-0.002	1.002	0.946	0.946
Guanzhuang_o	China_Shimao_LN	Thai.DG	0.549114	0.937	0.063	0.437	0.437		Guanzhuang_o	China_Shimao_LN	Thai.DG	0.44434	1.139	-0.139	0.556	0.556		Guanzhuang_o	China_Shimao_LN	Thai.DG	0.577339	0.627	0.373	7.77	7.77		Guanzhuang_o	China_Upper_YR_IA	Thai.DG	0.366142	1.495	-0.495	1.346	1.346
Guanzhuang_o	JXNT	Atayal.DG	0.153042	-2.642	3.642	10.898	10.898		Guanzhuang_o	JXNT	Atayal.DG	0.364109	-3.394	4.394	7.956	7.956		Guanzhuang_o	China_Upper_YR_IA	Atayal.DG	0.990897	4.257	-3.257	4.689	4.689		Guanzhuang_o	China_Upper_YR_LN	Atayal.DG	0.469074	0.98	0.02	0.408	0.408
Guanzhuang_o	JXNT	Tanshishan	0.83341	-6.179	7.179	10.402	10.402		Guanzhuang_o	JXNT	Tanshishan	0.737817	-6.257	7.257	13.44	13.44		Guanzhuang_o	China_Upper_YR_IA	Tanshishan	0.736053	-1.299	2.299	4.537	4.537		Guanzhuang_o	China_Upper_YR_LN	Tanshishan	0.854312	185.837	-184.837	10063.2	10063.2
Guanzhuang_o	JXNT	Xitoucun	0.912026	0.02	0.98	0.515	0.515		Guanzhuang_o	JXNT	Xitoucun	0.92472	0.06	0.94	0.35	0.35		Guanzhuang_o	China_Upper_YR_IA	Xitoucun	0.976212	5.869	-4.869	10.361	10.361		Guanzhuang_o	China_Upper_YR_LN	Xitoucun	0.912688	0.266	0.734	1.086	1.086
Guanzhuang_o	JXNT	Thai.DG	0.169806	-14.391	15.391	1896.01	1896.01		Guanzhuang_o	JXNT	Thai.DG	0.376279	-10.684	11.684	50.549	50.549		Guanzhuang_o	China_Upper_YR_IA	Thai.DG	0.668468	0.674	0.326	0.479	0.479		Guanzhuang_o	China_Upper_YR_LN	Thai.DG	0.888388	2.401	-1.401	1.55	1.55
Guanzhuang_o	LG	Atayal.DG	0.206021	0.622	0.378	0.407	0.407		Guanzhuang_o	LG	Atayal.DG	0.161573	0.58	0.42	0.469	0.469		Guanzhuang_o	China_Upper_YR_LN	Atayal.DG	0.517416	0.505	0.495	0.618	0.618		Guanzhuang_o	JXNT	Atayal.DG	0.20363	-2.443	3.443	6.449	6.449
Guanzhuang_o	LG	Tanshishan	0.423173	0.629	0.371	0.361	0.361		Guanzhuang_o	LG	Tanshishan	0.472881	0.644	0.356	0.268	0.268		Guanzhuang_o	China_Upper_YR_LN	Tanshishan	0.772887	0.132	0.868	0.326	0.326		Guanzhuang_o	JXNT	Tanshishan	0.882998	-5.643	6.643	7.971	7.971
Guanzhuang_o	LG	Xitoucun	0.846642	0.369	0.631	0.637	0.637		Guanzhuang_o	LG	Xitoucun	0.871507	0.327	0.673	0.541	0.541		Guanzhuang_o	China_Upper_YR_LN	Xitoucun	0.404643	0.64	0.36	0.731	0.731		Guanzhuang_o	JXNT	Xitoucun	0.931209	0.033	0.967	0.502	0.502
Guanzhuang_o	LG	Thai.DG	0.123112	0.731	0.269	0.751	0.751		Guanzhuang_o	LG	Thai.DG	0.10288	1.175	-0.175	0.87	0.87		Guanzhuang_o	China_Upper_YR_LN	Thai.DG	0.421776	0.22	0.78	0.552	0.552		Guanzhuang_o	JXNT	Thai.DG	0.19031	-9.659	10.659	717.905	717.905
Guanzhuang_o	China_Upper_YR_LN	Atayal.DG	0.386917	1.009	-0.009	0.435	0.435		Guanzhuang_o	China_Upper_YR_LN	Atayal.DG	0.447238	1.152	-0.152	0.515	0.515		Guanzhuang_o	JXNT	Atayal.DG	0.974698	0.91	0.09	0.459	0.459		Guanzhuang_o	LG	Atayal.DG	0.211843	0.584	0.416	0.299	0.299
Guanzhuang_o	China_Upper_YR_LN	Tanshishan	0.935839	8.208	-7.208	14.743	14.743		Guanzhuang_o	China_Upper_YR_LN	Tanshishan	0.959375	10.888	-9.888	26.624	26.624		Guanzhuang_o	JXNT	Tanshishan	0.662745	-0.361	1.361	0.86	0.86		Guanzhuang_o	LG	Tanshishan	0.284734	0.484	0.516	0.739	0.739
Guanzhuang_o	China_Upper_YR_LN	Xitoucun	0.901978	-0.02	1.02	1.439	1.439		Guanzhuang_o	China_Upper_YR_LN	Xitoucun	0.914327	0.05	0.95	1.226	1.226		Guanzhuang_o	JXNT	Xitoucun	0.399024	-3.505	4.505	18.479	18.479		Guanzhuang_o	LG	Xitoucun	0.898126	0.353	0.647	0.529	0.529
Guanzhuang_o	China_Upper_YR_LN	Thai.DG	0.911863	2.687	-1.687	1.741	1.741		Guanzhuang_o	China_Upper_YR_LN	Thai.DG	0.933555	2.398	-1.398	1.332	1.332		Guanzhuang_o	JXNT	Thai.DG	0.908371	1.099	-0.099	0.699	0.699		Guanzhuang_o	LG	Thai.DG	0.125693	0.6	0.4	0.843	0.843
Guanzhuang_o	China_Upper_YR_IA	Atayal.DG	0.591603	2.584	-1.584	2.252	2.252		Guanzhuang_o	China_Upper_YR_IA	Atayal.DG	0.730448	3.728	-2.728	4.675	4.675		Guanzhuang_o	LG	Atayal.DG	0.662883	0.495	0.505	0.435	0.435
Guanzhuang_o	China_Upper_YR_IA	Tanshishan	0.589567	10.168	-9.168	34.185	34.185		Guanzhuang_o	China_Upper_YR_IA	Tanshishan	0.658229	20.551	-19.551	1094.81	1094.81		Guanzhuang_o	LG	Tanshishan	0.990503	0.359	0.641	0.266	0.266
Guanzhuang_o	China_Upper_YR_IA	Xitoucun	0.832012	-0.036	1.036	1.041	1.041		Guanzhuang_o	China_Upper_YR_IA	Xitoucun	0.83914	0.036	0.964	0.798	0.798		Guanzhuang_o	LG	Xitoucun	0.633646	0.96	0.04	1.105	1.105
Guanzhuang_o	China_Upper_YR_IA	Thai.DG	0.294538	1.505	-0.505	1.299	1.299		Guanzhuang_o	China_Upper_YR_IA	Thai.DG	0.326371	2.222	-1.222	2.038	2.038		Guanzhuang_o	LG	Thai.DG	0.549729	0.756	0.244	0.518	0.518
D. Outgroup = Base, using YR-related populations and Eurasian steppe-related populations including West Eurasian-related populations as sources									K. Outgroup = Base + Shandong_EN, using YR-related populations and Eurasian steppe-related populations including West Eurasian-related populations as sources									L. Outgroup = Base + AR_EN, using YR-related populations and Eurasian steppe-related populations including West Eurasian-related populations as sources									M. Outgroup = Base + YR_MN, using YR-related populations and Eurasian steppe-related populations including West Eurasian-related populations as sources
Target	Ref1	Ref2	P value	Coeff1	Coeff2	std.err1	std.err2		Target	Ref1	Ref2	P value	Coeff1	Coeff2	std.err1	std.err2		Target	Ref1	Ref2	P value	Coeff1	Coeff2	std.err1	std.err2		Target	Ref1	Ref2	P value	Coeff1	Coeff2	std.err1	std.err2
Guanzhuang_o	China_YR_LN	Russia_Andronovo.SG	0.371334	1.104	-0.104	0.163	0.163		Guanzhuang_o	China_YR_LN	Russia_Andronovo.SG	0.139323	1.116	-0.116	0.147	0.147		Guanzhuang_o	China_YR_LN	Russia_Andronovo.SG	0.392368	1.124	-0.124	0.206	0.206		Guanzhuang_o	China_YR_MN	Russia_Andronovo.SG	0.583955	0.91	0.09	0.121	0.121
Guanzhuang_o	China_YR_LN	Russia_Srubnaya	0.447051	1.142	-0.142	0.139	0.139		Guanzhuang_o	China_YR_LN	Russia_Srubnaya	0.27839	1.095	-0.095	0.109	0.109		Guanzhuang_o	China_YR_LN	Russia_Srubnaya	0.269576	1.107	-0.107	0.353	0.353		Guanzhuang_o	China_YR_MN	Russia_Srubnaya	0.58966	0.94	0.06	0.107	0.107
Guanzhuang_o	China_YR_LN	Russia_MLBA_Sintashta	0.434465	1.131	-0.131	0.143	0.143		Guanzhuang_o	China_YR_LN	Russia_MLBA_Sintashta	0.278298	1.094	-0.094	0.115	0.115		Guanzhuang_o	China_YR_LN	Russia_MLBA_Sintashta	0.302014	1.165	-0.165	0.292	0.292		Guanzhuang_o	China_YR_MN	Russia_MLBA_Sintashta	0.582131	0.943	0.057	0.113	0.113
Guanzhuang_o	China_YR_LN	Russia_Afanasievo	0.454968	1.156	-0.156	0.153	0.153		Guanzhuang_o	China_YR_LN	Russia_Afanasievo	0.300778	1.123	-0.123	0.125	0.125		Guanzhuang_o	China_YR_LN	Russia_Afanasievo	0.309654	1.206	-0.206	0.288	0.288		Guanzhuang_o	China_YR_MN	Russia_Afanasievo	0.588533	0.94	0.06	0.115	0.115
Guanzhuang_o	China_YR_LN	Russia_Samara_EBA_Yamnaya	0.386441	1.109	-0.109	0.146	0.146		Guanzhuang_o	China_YR_LN	Russia_Samara_EBA_Yamnaya	0.23725	1.077	-0.077	0.114	0.114		Guanzhuang_o	China_YR_LN	Russia_Samara_EBA_Yamnaya	0.363313	1.273	-0.273	0.274	0.274		Guanzhuang_o	China_YR_MN	Russia_Samara_EBA_Yamnaya	0.593824	0.934	0.066	0.119	0.119
Guanzhuang_o	China_YR_LN	Russia_Kalmykia_EBA_Yamnaya.SG	0.513738	1.171	-0.171	0.177	0.177		Guanzhuang_o	China_YR_LN	Russia_Kalmykia_EBA_Yamnaya.SG	0.404049	1.129	-0.129	0.145	0.145		Guanzhuang_o	China_YR_LN	Russia_Kalmykia_EBA_Yamnaya.SG	0.457121	1.347	-0.347	0.282	0.282		Guanzhuang_o	China_YR_MN	Russia_Kalmykia_EBA_Yamnaya.SG	0.721031	0.937	0.063	0.12	0.12
Guanzhuang_o	China_YR_LN	Kyrgyzstan_TianShan_Saka.SG	0.332027	1.168	-0.168	0.218	0.218		Guanzhuang_o	China_YR_LN	Kyrgyzstan_TianShan_Saka.SG	0.212705	1.089	-0.089	0.154	0.154		Guanzhuang_o	China_YR_LN	Kyrgyzstan_TianShan_Saka.SG	0.482517	1.353	-0.353	0.362	0.362		Guanzhuang_o	China_YR_MN	Kyrgyzstan_TianShan_Saka.SG	0.545232	0.886	0.114	0.145	0.145
Guanzhuang_o	China_YR_LN	Kyrgyzstan_TianShan_Hun.SG	0.425329	1.203	-0.203	0.262	0.262		Guanzhuang_o	China_YR_LN	Kyrgyzstan_TianShan_Hun.SG	0.264128	1.128	-0.128	0.184	0.184		Guanzhuang_o	China_YR_LN	Kyrgyzstan_TianShan_Hun.SG	0.263697	1.249	-0.249	0.638	0.638		Guanzhuang_o	China_YR_MN	Kyrgyzstan_TianShan_Hun.SG	0.599381	0.901	0.099	0.178	0.178
Guanzhuang_o	China_YR_LN	Kazakhstan_Central_Saka.SG	0.450069	1.516	-0.516	0.484	0.484		Guanzhuang_o	China_YR_LN	Kazakhstan_Central_Saka.SG	0.21441	1.333	-0.333	0.359	0.359		Guanzhuang_o	China_YR_LN	Kazakhstan_Central_Saka.SG	0.253886	1.466	-0.466	0.661	0.661		Guanzhuang_o	China_YR_MN	Kazakhstan_Central_Saka.SG	0.552252	0.969	0.031	0.196	0.196
Guanzhuang_o	China_YR_LN	Hungary_IA_Scythian.SG	0.309605	1.131	-0.131	0.155	0.155		Guanzhuang_o	China_YR_LN	Hungary_IA_Scythian.SG	0.127518	1.104	-0.104	0.129	0.129		Guanzhuang_o	China_YR_LN	Hungary_IA_Scythian.SG	0.300575	0.834	0.166	0.338	0.338		Guanzhuang_o	China_YR_MN	Hungary_IA_Scythian.SG	0.568267	1.009	-0.009	0.105	0.105
Guanzhuang_o	China_YR_LN	Kazakhstan_Sarmatian_IA	0.446727	1.167	-0.167	0.164	0.164		Guanzhuang_o	China_YR_LN	Kazakhstan_Sarmatian_IA	0.302671	1.139	-0.139	0.134	0.134		Guanzhuang_o	China_YR_LN	Kazakhstan_Sarmatian_IA	0.274175	1.073	-0.073	0.273	0.273		Guanzhuang_o	China_YR_MN	Kazakhstan_Sarmatian_IA	0.548412	0.947	0.053	0.123	0.123
Guanzhuang_o	China_YR_LN	Russia_Sarmatian.SG	0.684363	1.204	-0.204	0.167	0.167		Guanzhuang_o	China_YR_LN	Russia_Sarmatian.SG	0.478933	1.119	-0.119	0.121	0.121		Guanzhuang_o	China_YR_LN	Russia_Sarmatian.SG	0.114923	1.334	-0.334	0.595	0.595		Guanzhuang_o	China_YR_MN	Russia_Sarmatian.SG	0.634353	1.011	-0.011	0.155	0.155
Guanzhuang_o	China_YR_LN	Kazakhstan_Nomad_IA.SG	0.829586	1.183	-0.183	0.147	0.147		Guanzhuang_o	China_YR_LN	Kazakhstan_Nomad_IA.SG	0.666533	1.129	-0.129	0.132	0.132		Guanzhuang_o	China_YR_LN	Kazakhstan_Nomad_IA.SG	0.700716	1.137	-0.137	0.192	0.192		Guanzhuang_o	China_YR_MN	Kazakhstan_Nomad_IA.SG	0.968321	1.033	-0.033	0.13	0.13
Guanzhuang_o	China_YR_LN	Kazakhstan_Nomad_HP.SG	0.437216	-2.141	3.141	10.235	10.235		Guanzhuang_o	China_YR_LN	Kazakhstan_Nomad_HP.SG	0.384206	11.885	-10.885	5578.29	5578.29		Guanzhuang_o	China_YR_LN	Kazakhstan_Nomad_HP.SG	0.916335	-4.566	5.566	12.468	12.468		Guanzhuang_o	China_YR_MN	Kazakhstan_Nomad_HP.SG	0.564952	0.821	0.179	0.523	0.523
Guanzhuang_o	China_YR_LN	Kazakhstan_Medieval_Nomad.SG	0.270051	1.1	-0.1	0.581	0.581		Guanzhuang_o	China_YR_LN	Kazakhstan_Medieval_Nomad.SG	0.1834	1.127	-0.127	0.424	0.424		Guanzhuang_o	China_YR_LN	Kazakhstan_Medieval_Nomad.SG	0.646066	2.104	-1.104	1.262	1.262		Guanzhuang_o	China_YR_MN	Kazakhstan_Medieval_Nomad.SG	0.548863	0.858	0.142	0.29	0.29
Guanzhuang_o	China_YR_LN	Russia_Shamanka_EBA.SG	0.273824	22.669	-21.669	1387.49	1387.49		Guanzhuang_o	China_YR_LN	Russia_Shamanka_EBA.SG	0.278313	7.791	-6.791	47.318	47.318		Guanzhuang_o	China_YR_LN	Russia_Shamanka_EBA.SG	0.732873	67.809	-66.809	13043.2	13043.2		Guanzhuang_o	China_YR_MN	Russia_Shamanka_EBA.SG	0.293302	1.106	-0.106	1.008	1.008
Guanzhuang_o	China_YR_LN	Russia_Shamanka_Eneolithic.SG	0.944417	-21.518	22.518	417.684	417.684		Guanzhuang_o	China_YR_LN	Russia_Shamanka_Eneolithic.SG	0.315003	1.846	-0.846	2.124	2.124		Guanzhuang_o	China_YR_LN	Russia_Shamanka_Eneolithic.SG	0.742565	-2.55	3.55	4.018	4.018		Guanzhuang_o	China_YR_MN	Russia_Shamanka_Eneolithic.SG	0.566763	0.773	0.227	0.869	0.869
Guanzhuang_o	China_YR_LN	Kazakhstan_Kangju.SG	0.192317	1.298	-0.298	0.924	0.924		Guanzhuang_o	China_YR_LN	Kazakhstan_Kangju.SG	0.13304	1.43	-0.43	0.536	0.536		Guanzhuang_o	China_YR_LN	Kazakhstan_Kangju.SG	0.361364	1.858	-0.858	0.799	0.799		Guanzhuang_o	China_YR_MN	Kazakhstan_Kangju.SG	0.147803	0.987	0.013	0.368	0.368
Guanzhuang_o	China_YR_LN	Russia_Tagar.SG	0.493419	1.234	-0.234	0.216	0.216		Guanzhuang_o	China_YR_LN	Russia_Tagar.SG	0.314068	1.159	-0.159	0.164	0.164		Guanzhuang_o	China_YR_LN	Russia_Tagar.SG	0.325757	1.377	-0.377	0.691	0.691		Guanzhuang_o	China_YR_MN	Russia_Tagar.SG	0.580494	0.937	0.063	0.14	0.14
Guanzhuang_o	China_YR_MN	Russia_Andronovo.SG	0.134639	1.061	-0.061	0.199	0.199		Guanzhuang_o	China_YR_MN	Russia_Andronovo.SG	0.0483767	1.19	-0.19	0.18	0.18		Guanzhuang_o	China_YR_MN	Russia_Andronovo.SG	0.0758679	0.959	0.041	0.26	0.26		Guanzhuang_o	JXNT	Russia_Andronovo.SG	0.112167	1.006	-0.006	0.177	0.177
Guanzhuang_o	China_YR_MN	Russia_Srubnaya	0.13021	1.047	-0.047	0.168	0.168		Guanzhuang_o	China_YR_MN	Russia_Srubnaya	0.070263	1.089	-0.089	0.128	0.128		Guanzhuang_o	China_YR_MN	Russia_Srubnaya	0.0573176	0.779	0.221	0.359	0.359		Guanzhuang_o	JXNT	Russia_Srubnaya	0.12086	0.986	0.014	0.139	0.139
Guanzhuang_o	China_YR_MN	Russia_MLBA_Sintashta	0.127522	1.032	-0.032	0.172	0.172		Guanzhuang_o	China_YR_MN	Russia_MLBA_Sintashta	0.0684102	1.092	-0.092	0.136	0.136		Guanzhuang_o	China_YR_MN	Russia_MLBA_Sintashta	0.0556627	0.851	0.149	0.315	0.315		Guanzhuang_o	JXNT	Russia_MLBA_Sintashta	0.123484	0.963	0.037	0.146	0.146
Guanzhuang_o	China_YR_MN	Russia_Afanasievo	0.127643	1.034	-0.034	0.186	0.186		Guanzhuang_o	China_YR_MN	Russia_Afanasievo	0.0731053	1.112	-0.112	0.146	0.146		Guanzhuang_o	China_YR_MN	Russia_Afanasievo	0.0431389	0.975	0.025	0.323	0.323		Guanzhuang_o	JXNT	Russia_Afanasievo	0.123177	0.971	0.029	0.156	0.156
Guanzhuang_o	China_YR_MN	Russia_Samara_EBA_Yamnaya	0.121707	0.987	0.013	0.174	0.174		Guanzhuang_o	China_YR_MN	Russia_Samara_EBA_Yamnaya	0.0619546	1.063	-0.063	0.134	0.134		Guanzhuang_o	China_YR_MN	Russia_Samara_EBA_Yamnaya	0.0478756	0.908	0.092	0.358	0.358		Guanzhuang_o	JXNT	Russia_Samara_EBA_Yamnaya	0.129635	0.937	0.063	0.156	0.156
Guanzhuang_o	China_YR_MN	Russia_Kalmykia_EBA_Yamnaya.SG	0.167362	1.044	-0.044	0.211	0.211		Guanzhuang_o	China_YR_MN	Russia_Kalmykia_EBA_Yamnaya.SG	0.112348	1.1	-0.1	0.161	0.161		Guanzhuang_o	China_YR_MN	Russia_Kalmykia_EBA_Yamnaya.SG	0.0018092	-1.473	2.473	5.079	5.079		Guanzhuang_o	JXNT	Russia_Kalmykia_EBA_Yamnaya.SG	0.129251	0.986	0.014	0.18	0.18
Guanzhuang_o	China_YR_MN	Kyrgyzstan_TianShan_Saka.SG	0.125139	0.993	0.007	0.235	0.235		Guanzhuang_o	China_YR_MN	Kyrgyzstan_TianShan_Saka.SG	0.0595543	1.093	-0.093	0.186	0.186		Guanzhuang_o	China_YR_MN	Kyrgyzstan_TianShan_Saka.SG	0.0626689	0.934	0.066	0.304	0.304		Guanzhuang_o	JXNT	Kyrgyzstan_TianShan_Saka.SG	0.150437	0.894	0.106	0.185	0.185
Guanzhuang_o	China_YR_MN	Kyrgyzstan_TianShan_Hun.SG	0.133523	0.919	0.081	0.277	0.277		Guanzhuang_o	China_YR_MN	Kyrgyzstan_TianShan_Hun.SG	0.0627858	1.098	-0.098	0.226	0.226		Guanzhuang_o	China_YR_MN	Kyrgyzstan_TianShan_Hun.SG	0.0580172	0.621	0.379	0.655	0.655		Guanzhuang_o	JXNT	Kyrgyzstan_TianShan_Hun.SG	0.147293	0.834	0.166	0.213	0.213
Guanzhuang_o	China_YR_MN	Kazakhstan_Central_Saka.SG	0.244925	1.48	-0.48	0.548	0.548		Guanzhuang_o	China_YR_MN	Kazakhstan_Central_Saka.SG	0.159623	1.468	-0.468	0.451	0.451		Guanzhuang_o	China_YR_MN	Kazakhstan_Central_Saka.SG	0.0340019	-1.17	2.17	1.469	1.469		Guanzhuang_o	JXNT	Kazakhstan_Central_Saka.SG	0.126123	0.974	0.026	0.301	0.301
Guanzhuang_o	China_YR_MN	Hungary_IA_Scythian.SG	0.176502	1.014	-0.014	0.164	0.164		Guanzhuang_o	China_YR_MN	Hungary_IA_Scythian.SG	0.0656795	1.148	-0.148	0.148	0.148		Guanzhuang_o	China_YR_MN	Hungary_IA_Scythian.SG	0.167284	0.67	0.33	0.491	0.491		Guanzhuang_o	JXNT	Hungary_IA_Scythian.SG	0.0805194	0.955	0.045	0.145	0.145
Guanzhuang_o	China_YR_MN	Kazakhstan_Sarmatian_IA	0.106305	1.07	-0.07	0.207	0.207		Guanzhuang_o	China_YR_MN	Kazakhstan_Sarmatian_IA	0.0845674	1.149	-0.149	0.159	0.159		Guanzhuang_o	China_YR_MN	Kazakhstan_Sarmatian_IA	0.059131	0.815	0.185	0.308	0.308		Guanzhuang_o	JXNT	Kazakhstan_Sarmatian_IA	0.0892885	1.029	-0.029	0.193	0.193
Guanzhuang_o	China_YR_MN	Russia_Sarmatian.SG	0.0783093	1.188	-0.188	0.272	0.272		Guanzhuang_o	China_YR_MN	Russia_Sarmatian.SG	0.0445923	1.278	-0.278	0.207	0.207		Guanzhuang_o	China_YR_MN	Russia_Sarmatian.SG	0.00274232	0.981	0.019	1.294	1.294		Guanzhuang_o	JXNT	Russia_Sarmatian.SG	0.122819	1.03	-0.03	0.164	0.164
Guanzhuang_o	China_YR_MN	Kazakhstan_Nomad_IA.SG	0.575644	1.147	-0.147	0.179	0.179		Guanzhuang_o	China_YR_MN	Kazakhstan_Nomad_IA.SG	0.379871	1.197	-0.197	0.151	0.151		Guanzhuang_o	China_YR_MN	Kazakhstan_Nomad_IA.SG	0.657701	1.047	-0.047	0.181	0.181		Guanzhuang_o	JXNT	Kazakhstan_Nomad_IA.SG	0.255153	1.046	-0.046	0.222	0.222
Guanzhuang_o	China_YR_MN	Kazakhstan_Nomad_HP.SG	0.308645	0.018	0.982	0.59	0.59		Guanzhuang_o	China_YR_MN	Kazakhstan_Nomad_HP.SG	0.130362	-1.184	2.184	2.378	2.378		Guanzhuang_o	China_YR_MN	Kazakhstan_Nomad_HP.SG	0.786775	-0.558	1.558	0.49	0.49		Guanzhuang_o	JXNT	Kazakhstan_Nomad_HP.SG	0.257379	-0.129	1.129	1.311	1.311
Guanzhuang_o	China_YR_MN	Kazakhstan_Medieval_Nomad.SG	0.131103	0.878	0.122	0.878	0.878		Guanzhuang_o	China_YR_MN	Kazakhstan_Medieval_Nomad.SG	0.0871057	1.23	-0.23	1.637	1.637		Guanzhuang_o	China_YR_MN	Kazakhstan_Medieval_Nomad.SG	0.238408	0.854	0.146	15.469	15.469		Guanzhuang_o	JXNT	Kazakhstan_Medieval_Nomad.SG	0.104747	0.892	0.108	0.739	0.739
Guanzhuang_o	China_YR_MN	Russia_Shamanka_EBA.SG	0.402455	8.003	-7.003	119.496	119.496		Guanzhuang_o	China_YR_MN	Russia_Shamanka_EBA.SG	0.405553	-158.127	159.127	14388	14388		Guanzhuang_o	China_YR_MN	Russia_Shamanka_EBA.SG	0.805775	-5.702	6.702	30.808	30.808		Guanzhuang_o	JXNT	Russia_Shamanka_EBA.SG	0.249903	-12.559	13.559	1669.76	1669.76
Guanzhuang_o	China_YR_MN	Russia_Shamanka_Eneolithic.SG	0.832565	-2.372	3.372	3.456	3.456		Guanzhuang_o	China_YR_MN	Russia_Shamanka_Eneolithic.SG	0.549907	-64.273	65.273	11152.6	11152.6		Guanzhuang_o	China_YR_MN	Russia_Shamanka_Eneolithic.SG	0.866592	-0.866	1.866	0.445	0.445		Guanzhuang_o	JXNT	Russia_Shamanka_Eneolithic.SG	0.344777	-0.95	1.95	4.103	4.103
Guanzhuang_o	China_YR_MN	Kazakhstan_Kangju.SG	0.0485141	1.357	-0.357	61.527	61.527		Guanzhuang_o	China_YR_MN	Kazakhstan_Kangju.SG	0.0442249	0.968	0.032	0.503	0.503		Guanzhuang_o	China_YR_MN	Kazakhstan_Kangju.SG	0.139163	0.983	0.017	5.314	5.314		Guanzhuang_o	JXNT	Kazakhstan_Kangju.SG	0.204253	0.684	0.316	0.326	0.326
Guanzhuang_o	China_YR_MN	Russia_Tagar.SG	0.135558	1.101	-0.101	0.275	0.275		Guanzhuang_o	China_YR_MN	Russia_Tagar.SG	0.0733506	1.136	-0.136	0.192	0.192		Guanzhuang_o	China_YR_MN	Russia_Tagar.SG	0.0562222	0.559	0.441	1.963	1.963		Guanzhuang_o	JXNT	Russia_Tagar.SG	0.119495	0.999	0.001	0.222	0.222
Guanzhuang_o	JXNT	Russia_Andronovo.SG	0.07782	1.018	-0.018	0.195	0.195		Guanzhuang_o	JXNT	Russia_Andronovo.SG	0.00377504	1.168	-0.168	0.224	0.224		Guanzhuang_o	JXNT	Russia_Andronovo.SG	0.909996	0.999	0.001	0.206	0.206		Guanzhuang_o	LG	Russia_Andronovo.SG	0.142608	1.089	-0.089	0.241	0.241
Guanzhuang_o	JXNT	Russia_Srubnaya	0.0835145	0.991	0.009	0.149	0.149		Guanzhuang_o	JXNT	Russia_Srubnaya	0.00326925	1.083	-0.083	0.144	0.144		Guanzhuang_o	JXNT	Russia_Srubnaya	0.913492	0.951	0.049	0.211	0.211		Guanzhuang_o	LG	Russia_Srubnaya	0.170072	1.146	-0.146	0.205	0.205
Guanzhuang_o	JXNT	Russia_MLBA_Sintashta	0.085387	0.967	0.033	0.158	0.158		Guanzhuang_o	JXNT	Russia_MLBA_Sintashta	0.0031548	1.069	-0.069	0.158	0.158		Guanzhuang_o	JXNT	Russia_MLBA_Sintashta	0.914236	0.964	0.036	0.217	0.217		Guanzhuang_o	LG	Russia_MLBA_Sintashta	0.145737	1.031	-0.031	0.178	0.178
Guanzhuang_o	JXNT	Russia_Afanasievo	0.0850993	0.976	0.024	0.166	0.166		Guanzhuang_o	JXNT	Russia_Afanasievo	0.00358725	1.112	-0.112	0.176	0.176		Guanzhuang_o	JXNT	Russia_Afanasievo	0.914964	0.969	0.031	0.211	0.211		Guanzhuang_o	LG	Russia_Afanasievo	0.157003	1.117	-0.117	0.225	0.225
Guanzhuang_o	JXNT	Russia_Samara_EBA_Yamnaya	0.0893739	0.938	0.062	0.161	0.161		Guanzhuang_o	JXNT	Russia_Samara_EBA_Yamnaya	0.002846	1.066	-0.066	0.172	0.172		Guanzhuang_o	JXNT	Russia_Samara_EBA_Yamnaya	0.906702	0.966	0.034	0.19	0.19		Guanzhuang_o	LG	Russia_Samara_EBA_Yamnaya	0.143183	1.051	-0.051	0.214	0.214
Guanzhuang_o	JXNT	Russia_Kalmykia_EBA_Yamnaya.SG	0.0899182	0.99	0.01	0.188	0.188		Guanzhuang_o	JXNT	Russia_Kalmykia_EBA_Yamnaya.SG	0.00740394	1.177	-0.177	0.273	0.273		Guanzhuang_o	JXNT	Russia_Kalmykia_EBA_Yamnaya.SG	0.923905	1.065	-0.065	0.254	0.254		Guanzhuang_o	LG	Russia_Kalmykia_EBA_Yamnaya.SG	0.150419	1.082	-0.082	0.288	0.288
Guanzhuang_o	JXNT	Kyrgyzstan_TianShan_Saka.SG	0.10637	0.897	0.103	0.189	0.189		Guanzhuang_o	JXNT	Kyrgyzstan_TianShan_Saka.SG	0.00311189	0.976	0.024	0.19	0.19		Guanzhuang_o	JXNT	Kyrgyzstan_TianShan_Saka.SG	0.910227	0.979	0.021	0.219	0.219		Guanzhuang_o	LG	Kyrgyzstan_TianShan_Saka.SG	0.14972	1.069	-0.069	0.299	0.299
Guanzhuang_o	JXNT	Kyrgyzstan_TianShan_Hun.SG	0.103508	0.835	0.165	0.216	0.216		Guanzhuang_o	JXNT	Kyrgyzstan_TianShan_Hun.SG	0.00255897	1.02	-0.02	0.262	0.262		Guanzhuang_o	JXNT	Kyrgyzstan_TianShan_Hun.SG	0.897158	0.944	0.056	0.282	0.282		Guanzhuang_o	LG	Kyrgyzstan_TianShan_Hun.SG	0.149329	1.168	-0.168	0.483	0.483
Guanzhuang_o	JXNT	Kazakhstan_Central_Saka.SG	0.098011	0.986	0.014	0.295	0.295		Guanzhuang_o	JXNT	Kazakhstan_Central_Saka.SG	0.0159463	1.682	-0.682	1.98	1.98		Guanzhuang_o	JXNT	Kazakhstan_Central_Saka.SG	0.946794	1.026	-0.026	0.246	0.246		Guanzhuang_o	LG	Kazakhstan_Central_Saka.SG	0.119437	2.135	-1.135	4.5	4.5
Guanzhuang_o	JXNT	Hungary_IA_Scythian.SG	0.0537301	0.952	0.048	0.151	0.151		Guanzhuang_o	JXNT	Hungary_IA_Scythian.SG	0.00272308	1.085	-0.085	0.145	0.145		Guanzhuang_o	JXNT	Hungary_IA_Scythian.SG	0.975318	0.813	0.187	0.162	0.162		Guanzhuang_o	LG	Hungary_IA_Scythian.SG	0.127366	1.171	-0.171	0.224	0.224
Guanzhuang_o	JXNT	Kazakhstan_Sarmatian_IA	0.060059	1.036	-0.036	0.208	0.208		Guanzhuang_o	JXNT	Kazakhstan_Sarmatian_IA	0.00562667	1.229	-0.229	0.233	0.233		Guanzhuang_o	JXNT	Kazakhstan_Sarmatian_IA	0.911318	0.935	0.065	0.214	0.214		Guanzhuang_o	LG	Kazakhstan_Sarmatian_IA	0.144644	1.071	-0.071	0.236	0.236
Guanzhuang_o	JXNT	Russia_Sarmatian.SG	0.0927397	1.065	-0.065	0.191	0.191		Guanzhuang_o	JXNT	Russia_Sarmatian.SG	0.00171987	1.148	-0.148	0.201	0.201		Guanzhuang_o	JXNT	Russia_Sarmatian.SG	0.753105	1.051	-0.051	0.294	0.294		Guanzhuang_o	LG	Russia_Sarmatian.SG	0.315089	1.438	-0.438	0.378	0.378
Guanzhuang_o	JXNT	Kazakhstan_Nomad_IA.SG	0.18964	1.042	-0.042	0.225	0.225		Guanzhuang_o	JXNT	Kazakhstan_Nomad_IA.SG	0.0362607	1.074	-0.074	0.185	0.185		Guanzhuang_o	JXNT	Kazakhstan_Nomad_IA.SG	0.853104	1.02	-0.02	0.347	0.347		Guanzhuang_o	LG	Kazakhstan_Nomad_IA.SG	0.570444	1.402	-0.402	0.569	0.569
Guanzhuang_o	JXNT	Kazakhstan_Nomad_HP.SG	0.443911	-0.443	1.443	0.903	0.903		Guanzhuang_o	JXNT	Kazakhstan_Nomad_HP.SG	0.15313	-0.662	1.662	0.872	0.872		Guanzhuang_o	JXNT	Kazakhstan_Nomad_HP.SG	0.903611	0.811	0.189	0.528	0.528		Guanzhuang_o	LG	Kazakhstan_Nomad_HP.SG	0.288286	14.362	-13.362	3425.94	3425.94
Guanzhuang_o	JXNT	Kazakhstan_Medieval_Nomad.SG	0.0767266	0.83	0.17	0.746	0.746		Guanzhuang_o	JXNT	Kazakhstan_Medieval_Nomad.SG	0.0296074	-3.245	4.245	10.638	10.638		Guanzhuang_o	JXNT	Kazakhstan_Medieval_Nomad.SG	0.652212	1.079	-0.079	0.698	0.698		Guanzhuang_o	LG	Kazakhstan_Medieval_Nomad.SG	0.321975	3.144	-2.144	19.776	19.776
Guanzhuang_o	JXNT	Russia_Shamanka_EBA.SG	0.197105	-10.718	11.718	910.141	910.141		Guanzhuang_o	JXNT	Russia_Shamanka_EBA.SG	0.189489	-2.069	3.069	3.379	3.379		Guanzhuang_o	JXNT	Russia_Shamanka_EBA.SG	0.733444	1.127	-0.127	2.293	2.293		Guanzhuang_o	LG	Russia_Shamanka_EBA.SG	0.246752	5.065	-4.065	22.921	22.921
Guanzhuang_o	JXNT	Russia_Shamanka_Eneolithic.SG	0.453367	-1.239	2.239	2.639	2.639		Guanzhuang_o	JXNT	Russia_Shamanka_Eneolithic.SG	0.589213	-1.862	2.862	1.482	1.482		Guanzhuang_o	JXNT	Russia_Shamanka_Eneolithic.SG	0.922303	1.033	-0.033	0.853	0.853		Guanzhuang_o	LG	Russia_Shamanka_Eneolithic.SG	0.319173	0.147	0.853	1.372	1.372
Guanzhuang_o	JXNT	Kazakhstan_Kangju.SG	0.173693	0.763	0.237	6.776	6.776		Guanzhuang_o	JXNT	Kazakhstan_Kangju.SG	0.0231983	0.397	0.603	77.565	77.565		Guanzhuang_o	JXNT	Kazakhstan_Kangju.SG	0.503048	1.968	-0.968	1.103	1.103		Guanzhuang_o	LG	Kazakhstan_Kangju.SG	0.307226	0.839	0.161	1.114	1.114
Guanzhuang_o	JXNT	Russia_Tagar.SG	0.0828227	1.012	-0.012	0.24	0.24		Guanzhuang_o	JXNT	Russia_Tagar.SG	0.00385328	1.157	-0.157	0.243	0.243		Guanzhuang_o	JXNT	Russia_Tagar.SG	0.93289	0.87	0.13	0.293	0.293		Guanzhuang_o	LG	Russia_Tagar.SG	0.18327	1.263	-0.263	0.367	0.367
Guanzhuang_o	LG	Russia_Andronovo.SG	0.139928	1.231	-0.231	0.383	0.383		Guanzhuang_o	LG	Russia_Andronovo.SG	0.062609	1.19	-0.19	0.198	0.198		Guanzhuang_o	LG	Russia_Andronovo.SG	0.555565	1.136	-0.136	0.287	0.287
Guanzhuang_o	LG	Russia_Srubnaya	0.172859	1.252	-0.252	0.28	0.28		Guanzhuang_o	LG	Russia_Srubnaya	0.0769578	1.127	-0.127	0.136	0.136		Guanzhuang_o	LG	Russia_Srubnaya	0.618167	1.298	-0.298	0.332	0.332
Guanzhuang_o	LG	Russia_MLBA_Sintashta	0.121897	1.083	-0.083	0.217	0.217		Guanzhuang_o	LG	Russia_MLBA_Sintashta	0.0671646	1.09	-0.09	0.135	0.135		Guanzhuang_o	LG	Russia_MLBA_Sintashta	0.541082	1.185	-0.185	0.293	0.293
Guanzhuang_o	LG	Russia_Afanasievo	0.143246	1.198	-0.198	0.283	0.283		Guanzhuang_o	LG	Russia_Afanasievo	0.0755037	1.142	-0.142	0.159	0.159		Guanzhuang_o	LG	Russia_Afanasievo	0.651998	1.312	-0.312	0.311	0.311
Guanzhuang_o	LG	Russia_Samara_EBA_Yamnaya	0.118486	1.099	-0.099	0.26	0.26		Guanzhuang_o	LG	Russia_Samara_EBA_Yamnaya	0.0705331	1.085	-0.085	0.143	0.143		Guanzhuang_o	LG	Russia_Samara_EBA_Yamnaya	0.539146	1.15	-0.15	0.258	0.258
Guanzhuang_o	LG	Russia_Kalmykia_EBA_Yamnaya.SG	0.127445	1.184	-0.184	0.452	0.452		Guanzhuang_o	LG	Russia_Kalmykia_EBA_Yamnaya.SG	0.0654079	1.084	-0.084	0.192	0.192		Guanzhuang_o	LG	Russia_Kalmykia_EBA_Yamnaya.SG	0.529572	1.058	-0.058	0.24	0.24
Guanzhuang_o	LG	Kyrgyzstan_TianShan_Saka.SG	0.121276	1.118	-0.118	0.365	0.365		Guanzhuang_o	LG	Kyrgyzstan_TianShan_Saka.SG	0.0619361	1.1	-0.1	0.193	0.193		Guanzhuang_o	LG	Kyrgyzstan_TianShan_Saka.SG	0.6077	1.234	-0.234	0.281	0.281
Guanzhuang_o	LG	Kyrgyzstan_TianShan_Hun.SG	0.12188	1.205	-0.205	0.529	0.529		Guanzhuang_o	LG	Kyrgyzstan_TianShan_Hun.SG	0.0597012	1.14	-0.14	0.246	0.246		Guanzhuang_o	LG	Kyrgyzstan_TianShan_Hun.SG	0.490393	1.07	-0.07	0.395	0.395
Guanzhuang_o	LG	Kazakhstan_Central_Saka.SG	0.169203	2.463	-1.463	2.297	2.297		Guanzhuang_o	LG	Kazakhstan_Central_Saka.SG	0.0652656	1.49	-0.49	0.902	0.902		Guanzhuang_o	LG	Kazakhstan_Central_Saka.SG	0.419447	1.369	-0.369	0.668	0.668
Guanzhuang_o	LG	Hungary_IA_Scythian.SG	0.123774	1.27	-0.27	0.292	0.292		Guanzhuang_o	LG	Hungary_IA_Scythian.SG	0.0325374	1.17	-0.17	0.153	0.153		Guanzhuang_o	LG	Hungary_IA_Scythian.SG	0.554999	1.039	-0.039	0.294	0.294
Guanzhuang_o	LG	Kazakhstan_Sarmatian_IA	0.129343	1.163	-0.163	0.316	0.316		Guanzhuang_o	LG	Kazakhstan_Sarmatian_IA	0.0741559	1.136	-0.136	0.171	0.171		Guanzhuang_o	LG	Kazakhstan_Sarmatian_IA	0.576227	1.188	-0.188	0.289	0.289
Guanzhuang_o	LG	Russia_Sarmatian.SG	0.290762	1.6	-0.6	0.582	0.582		Guanzhuang_o	LG	Russia_Sarmatian.SG	0.0499889	1.245	-0.245	0.198	0.198		Guanzhuang_o	LG	Russia_Sarmatian.SG	0.562735	1.301	-0.301	0.311	0.311
Guanzhuang_o	LG	Kazakhstan_Nomad_IA.SG	0.533807	1.453	-0.453	0.553	0.553		Guanzhuang_o	LG	Kazakhstan_Nomad_IA.SG	0.318676	1.075	-0.075	0.167	0.167		Guanzhuang_o	LG	Kazakhstan_Nomad_IA.SG	0.814484	1.354	-0.354	0.489	0.489
Guanzhuang_o	LG	Kazakhstan_Nomad_HP.SG	0.216489	12.152	-11.152	1326.56	1326.56		Guanzhuang_o	LG	Kazakhstan_Nomad_HP.SG	0.32136	-111.745	112.745	25314.9	25314.9		Guanzhuang_o	LG	Kazakhstan_Nomad_HP.SG	0.757676	-0.689	1.689	1.049	1.049
Guanzhuang_o	LG	Kazakhstan_Medieval_Nomad.SG	0.356749	1.472	-0.472	2.481	2.481		Guanzhuang_o	LG	Kazakhstan_Medieval_Nomad.SG	0.362144	1.568	-0.568	0.864	0.864		Guanzhuang_o	LG	Kazakhstan_Medieval_Nomad.SG	0.701058	1.016	-0.016	0.487	0.487
Guanzhuang_o	LG	Russia_Shamanka_EBA.SG	0.238443	-43.31	44.31	4751.42	4751.42		Guanzhuang_o	LG	Russia_Shamanka_EBA.SG	0.262876	-7.22	8.22	338.138	338.138		Guanzhuang_o	LG	Russia_Shamanka_EBA.SG	0.537789	1.006	-0.006	0.494	0.494
Guanzhuang_o	LG	Russia_Shamanka_Eneolithic.SG	0.424562	-0.119	1.119	1.138	1.138		Guanzhuang_o	LG	Russia_Shamanka_Eneolithic.SG	0.0622676	-0.588	1.588	2.86	2.86		Guanzhuang_o	LG	Russia_Shamanka_Eneolithic.SG	0.569676	0.596	0.404	0.573	0.573
Guanzhuang_o	LG	Kazakhstan_Kangju.SG	0.301017	1.389	-0.389	2.67	2.67		Guanzhuang_o	LG	Kazakhstan_Kangju.SG	0.253361	1.255	-0.255	0.744	0.744		Guanzhuang_o	LG	Kazakhstan_Kangju.SG	0.923226	1.395	-0.395	0.394	0.394
Guanzhuang_o	LG	Russia_Tagar.SG	0.206198	1.452	-0.452	0.526	0.526		Guanzhuang_o	LG	Russia_Tagar.SG	0.0880171	1.188	-0.188	0.194	0.194		Guanzhuang_o	LG	Russia_Tagar.SG	0.56314	1.262	-0.262	0.374	0.374

## Sheet: I
Table S1I. QpAdm modeling of YR-LBIA populations reported in previous study . We used the following populations as the outgroup: Mbuti.DG, ONG.SG, Russia_Ust_Ishim.DG, Russia_Kostenki14, Israel_Natufian_published, Italy_North_Villabruna_HG, Iran_GanjDareh_N, Turkey_N, Mixe.DG, Papuan.DG, Taiwan_Hanben_IA, and Shandong_EN. Well-fitted qpAdm models (P value ≥0.05, admixture proportion estimates bet…
A. One-way modeling of YR-LBIA populations using the ancient East Asians
Target	Ref1	P value
JXNT	China_YR_LN	0.373609
JXNT	China_YR_MN	0.228148
JXNT	China_Upper_YR_LN	0.00199429
JXNT	China_Upper_YR_IA	0.299908
JXNT	China_WLR_BA	0.538726
JXNT	China_WLR_MN	8.96648e-06
JXNT	China_WLR_LN	0.566626
JXNT	China_AR_EN	6.71196e-07
JXNT	China_AR_IA	2.15308e-05
JXNT	China_Shimao_LN	0.615697
JXNT	China_Miaozigou_MN	0.512353
JXNT	China_Wuzhuangguoliang_LN.EC	0.41766
JXNT	China_HMMH_MN	4.68324e-06
JXNT	China_AR_Xianbei_IA	7.4278e-05
JXNT	GaoHuaHua	8.76962e-07
JXNT	Shenxian	2.52899e-06
JXNT	LaCen	6.96734e-14
JXNT	BaBanQinCen	4.16932e-24
JXNT	Dushan	2.48269e-15
JXNT	Yiyang	1.92653e-06
JXNT	Qihe3	1.324e-07
JXNT	Longlin	8.7828e-20
JXNT	LG	0.873419
JXNT	China_AR_Xianbei_IA	7.4278e-05
JXNT	Yumin	1.27401e-11
JXNT	Liangdao1	7.19844e-10
JXNT	Liangdao2	6.41418e-20
JXNT	Xitoucun	1.81353e-37
JXNT	Tanshishan	6.55415e-19
JXNT	Boshan	4.87209e-09
JXNT	Suogang	3.03364e-08
JXNT	Baojianshan	2.08372e-34
JXNT	China_AmurRiver_N	1.20121e-18
JXNT	China_AmurRiver_EarlyN	4.14275e-05
JXNT	China_AmurRiver_Mesolithic	1.38117e-10
JXNT	China_AmurRiver_Paleolithic	2.97938e-144
LG	China_YR_LN	0.367521
LG	China_YR_MN	0.164796
LG	China_Upper_YR_LN	0.000713541
LG	China_Upper_YR_IA	0.773765
LG	China_WLR_BA	0.697717
LG	China_WLR_MN	5.44713e-08
LG	China_WLR_LN	0.94675
LG	China_AR_EN	6.76306e-09
LG	China_AR_IA	0.00595557
LG	China_Shimao_LN	0.566364
LG	China_Miaozigou_MN	0.0129224
LG	China_Wuzhuangguoliang_LN.EC	0.527842
LG	China_HMMH_MN	1.44422e-07
LG	China_AR_Xianbei_IA	0.104955
LG	GaoHuaHua	2.65677e-05
LG	Shenxian	1.28972e-06
LG	LaCen	1.27932e-12
LG	BaBanQinCen	8.67071e-20
LG	Dushan	2.94097e-15
LG	Yiyang	5.62751e-07
LG	Qihe3	4.00744e-07
LG	Longlin	3.73977e-23
LG	JXNT	0.873419
LG	China_AR_Xianbei_IA	0.104955
LG	Yumin	2.21483e-13
LG	Liangdao1	3.31014e-12
LG	Liangdao2	1.12377e-17
LG	Xitoucun	4.46213e-37
LG	Tanshishan	6.99249e-23
LG	Boshan	2.93364e-11
LG	Suogang	5.30933e-08
LG	Baojianshan	2.03539e-33
LG	China_AmurRiver_N	1.69704e-17
LG	China_AmurRiver_EarlyN	3.4482e-05
LG	China_AmurRiver_Mesolithic	2.91169e-11
LG	China_AmurRiver_Paleolithic	2.97698e-126
B. Two-way modeling of YR-LBIA populations (Using YR-related populations and Southeast Asian populations as sources )
Target	Ref1	Ref2	P value	Coeff1	Coeff2	std.err1	std.err2
JXNT	China_YR_LN	Ami.DG	0.349312	1.038	-0.038	0.046	0.046
JXNT	China_YR_LN	Atayal.DG	0.33749	1.033	-0.033	0.046	0.046
JXNT	China_YR_LN	Tanshishan	0.192005	1.03	-0.03	0.085	0.085
JXNT	China_YR_LN	Xitoucun	0.361674	1.108	-0.108	0.068	0.068
JXNT	China_YR_LN	Thai.DG	0.298697	0.986	0.014	0.08	0.08
JXNT	China_YR_MN	Ami.DG	0.395605	0.916	0.084	0.043	0.043
JXNT	China_YR_MN	Atayal.DG	0.392351	0.918	0.082	0.043	0.043
JXNT	China_YR_MN	Tanshishan	0.403591	0.95	0.05	0.081	0.081
JXNT	China_YR_MN	Xitoucun	0.167982	1.008	-0.008	0.067	0.067
JXNT	China_YR_MN	Thai.DG	0.187525	1.047	-0.047	0.107	0.107
JXNT	China_Upper_YR_LN	Ami.DG	0.0618657	0.856	0.144	0.041	0.041
JXNT	China_Upper_YR_LN	Atayal.DG	0.105791	0.849	0.151	0.041	0.041
JXNT	China_Upper_YR_LN	Tanshishan	0.150567	0.771	0.229	0.067	0.067
JXNT	China_Upper_YR_LN	Thai.DG	0.00120822	0.985	0.015	0.111	0.111
JXNT	China_Upper_YR_IA	Ami.DG	0.239725	1.012	-0.012	0.051	0.051
JXNT	China_Upper_YR_IA	Atayal.DG	0.237351	1.013	-0.013	0.05	0.05
JXNT	China_Upper_YR_IA	Tanshishan	0.873145	1.03	-0.03	0.085	0.085
JXNT	China_Upper_YR_IA	Xitoucun	0.507167	1.085	-0.085	0.08	0.08
JXNT	China_Upper_YR_IA	Thai.DG	0.56625	1.235	-0.235	0.134	0.134
JXNT	China_Shimao_LN	Ami.DG	0.8425	0.909	0.091	0.047	0.047
JXNT	China_Shimao_LN	Atayal.DG	0.862827	0.911	0.089	0.047	0.047
JXNT	China_Shimao_LN	Tanshishan	0.847686	0.912	0.088	0.076	0.076
JXNT	China_Shimao_LN	Xitoucun	0.708401	0.918	0.082	0.064	0.064
JXNT	China_Shimao_LN	Thai.DG	0.604461	0.917	0.083	0.089	0.089
LG	China_YR_LN	Ami.DG	0.317908	1.026	-0.026	0.047	0.047
LG	China_YR_LN	Atayal.DG	0.315378	1.018	-0.018	0.045	0.045
LG	China_YR_LN	Tanshishan	0.0203226	1.061	-0.061	0.086	0.086
LG	China_YR_LN	Xitoucun	0.366479	1.067	-0.067	0.07	0.07
LG	China_YR_LN	Thai.DG	0.481761	0.879	0.121	0.08	0.08
LG	China_YR_MN	Ami.DG	0.563627	0.887	0.113	0.042	0.042
LG	China_YR_MN	Atayal.DG	0.55881	0.889	0.111	0.041	0.041
LG	China_YR_MN	Tanshishan	0.191728	0.965	0.035	0.08	0.08
LG	China_YR_MN	Xitoucun	0.291023	0.937	0.063	0.068	0.068
LG	China_YR_MN	Thai.DG	0.145138	0.923	0.077	0.113	0.113
LG	China_Upper_YR_LN	Ami.DG	0.146392	0.831	0.169	0.038	0.038
LG	China_Upper_YR_LN	Atayal.DG	0.257735	0.827	0.173	0.037	0.037
LG	China_Upper_YR_LN	Tanshishan	0.0492372	0.788	0.212	0.064	0.064
LG	China_Upper_YR_LN	Xitoucun	0.0966132	0.847	0.153	0.057	0.057
LG	China_Upper_YR_LN	Thai.DG	0.000986428	0.851	0.149	0.11	0.11
LG	China_Upper_YR_IA	Ami.DG	0.710652	0.987	0.013	0.05	0.05
LG	China_Upper_YR_IA	Atayal.DG	0.723168	0.983	0.017	0.049	0.049
LG	China_Upper_YR_IA	Tanshishan	0.482287	1.003	-0.003	0.086	0.086
LG	China_Upper_YR_IA	Xitoucun	0.78251	1.026	-0.026	0.08	0.08
LG	China_Upper_YR_IA	Thai.DG	0.772837	1.09	-0.09	0.12	0.12
LG	China_Shimao_LN	Ami.DG	0.927142	0.896	0.104	0.043	0.043
LG	China_Shimao_LN	Atayal.DG	0.953823	0.893	0.107	0.043	0.043
LG	China_Shimao_LN	Tanshishan	0.670804	0.917	0.083	0.075	0.075
LG	China_Shimao_LN	Xitoucun	0.981216	0.873	0.127	0.06	0.06
LG	China_Shimao_LN	Thai.DG	0.712044	0.856	0.144	0.093	0.093
C. Two-way modeling of YR-LBIA populations (Using YR-related populations and Eurasian steppe-related populations as sources )
Target	Ref1	Ref2	P value	Coeff1	Coeff2	std.err1	std.err2
JXNT	China_YR_LN	Kazakhstan_Kangju.SG	0.0879651	1	0	0.016	0.016
JXNT	China_YR_LN	Mongolia_EBA_Chemurchek_2	0.240437	1	0	0.013	0.013
JXNT	China_YR_LN	Kyrgyzstan_TianShan_Hun.SG	0.294372	0.996	0.004	0.015	0.015
JXNT	China_YR_LN	Russia_Sarmatian.SG	0.13385	1.003	-0.003	0.012	0.012
JXNT	China_YR_LN	Kazakhstan_Sarmatian_IA	0.29448	0.998	0.002	0.012	0.012
JXNT	China_YR_LN	Russia_MLBA_Sintashta	0.295049	0.998	0.002	0.01	0.01
JXNT	China_YR_LN	Russia_Tagar.SG	0.274219	0.998	0.002	0.013	0.013
JXNT	China_YR_LN	Russia_Samara_EBA_Yamnaya	0.298271	0.997	0.003	0.011	0.011
JXNT	China_YR_MN	Kazakhstan_Kangju.SG	0.36653	1.022	-0.022	0.018	0.018
JXNT	China_YR_MN	Mongolia_EBA_Chemurchek_2	0.40768	1.035	-0.035	0.015	0.015
JXNT	China_YR_MN	Kyrgyzstan_TianShan_Hun.SG	0.562629	1.04	-0.04	0.017	0.017
JXNT	China_YR_MN	Russia_Sarmatian.SG	0.201701	1.042	-0.042	0.014	0.014
JXNT	China_YR_MN	Kazakhstan_Sarmatian_IA	0.543245	1.03	-0.03	0.013	0.013
JXNT	China_YR_MN	Russia_MLBA_Sintashta	0.542875	1.025	-0.025	0.011	0.011
JXNT	China_YR_MN	Russia_Tagar.SG	0.547619	1.033	-0.033	0.014	0.014
JXNT	China_YR_MN	Russia_Samara_EBA_Yamnaya	0.5741	1.027	-0.027	0.012	0.012
JXNT	China_Upper_YR_LN	Kazakhstan_Kangju.SG	0.000291227	1.021	-0.021	0.017	0.017
JXNT	China_Upper_YR_LN	Mongolia_EBA_Chemurchek_2	0.0288057	1.049	-0.049	0.015	0.015
JXNT	China_Upper_YR_LN	Kyrgyzstan_TianShan_Hun.SG	0.0280948	1.052	-0.052	0.017	0.017
JXNT	China_Upper_YR_LN	Russia_Sarmatian.SG	0.00379065	1.041	-0.041	0.014	0.014
JXNT	China_Upper_YR_LN	Kazakhstan_Sarmatian_IA	0.0250861	1.038	-0.038	0.013	0.013
JXNT	China_Upper_YR_LN	Russia_MLBA_Sintashta	0.0219816	1.032	-0.032	0.011	0.011
JXNT	China_Upper_YR_LN	Russia_Tagar.SG	0.0251375	1.042	-0.042	0.014	0.014
JXNT	China_Upper_YR_LN	Russia_Samara_EBA_Yamnaya	0.0302667	1.036	-0.036	0.012	0.012
JXNT	China_Upper_YR_IA	Kazakhstan_Kangju.SG	0.0312703	1.023	-0.023	0.019	0.019
JXNT	China_Upper_YR_IA	Mongolia_EBA_Chemurchek_2	0.629113	1.029	-0.029	0.016	0.016
JXNT	China_Upper_YR_IA	Kyrgyzstan_TianShan_Hun.SG	0.532576	1.036	-0.036	0.018	0.018
JXNT	China_Upper_YR_IA	Russia_Sarmatian.SG	0.468815	1.034	-0.034	0.014	0.014
JXNT	China_Upper_YR_IA	Kazakhstan_Sarmatian_IA	0.500343	1.027	-0.027	0.014	0.014
JXNT	China_Upper_YR_IA	Russia_MLBA_Sintashta	0.541627	1.024	-0.024	0.012	0.012
JXNT	China_Upper_YR_IA	Russia_Tagar.SG	0.477521	1.029	-0.029	0.015	0.015
JXNT	China_Upper_YR_IA	Russia_Samara_EBA_Yamnaya	0.611318	1.025	-0.025	0.013	0.013
LG	China_YR_LN	Kazakhstan_Kangju.SG	0.861287	1.005	-0.005	0.015	0.015
LG	China_YR_LN	Mongolia_EBA_Chemurchek_2	0.272129	0.99	0.01	0.013	0.013
LG	China_YR_LN	Kyrgyzstan_TianShan_Hun.SG	0.321737	0.989	0.011	0.015	0.015
LG	China_YR_LN	Russia_Sarmatian.SG	0.66188	0.995	0.005	0.011	0.011
LG	China_YR_LN	Kazakhstan_Sarmatian_IA	0.314326	0.993	0.007	0.011	0.011
LG	China_YR_LN	Russia_MLBA_Sintashta	0.313788	0.994	0.006	0.01	0.01
LG	China_YR_LN	Russia_Tagar.SG	0.369017	0.993	0.007	0.012	0.012
LG	China_YR_LN	Russia_Samara_EBA_Yamnaya	0.319558	0.993	0.007	0.01	0.01
LG	China_YR_MN	Kazakhstan_Kangju.SG	0.870031	1.033	-0.033	0.018	0.018
LG	China_YR_MN	Mongolia_EBA_Chemurchek_2	0.306424	1.031	-0.031	0.015	0.015
LG	China_YR_MN	Kyrgyzstan_TianShan_Hun.SG	0.386614	1.037	-0.037	0.017	0.017
LG	China_YR_MN	Russia_Sarmatian.SG	0.575056	1.036	-0.036	0.013	0.013
LG	China_YR_MN	Kazakhstan_Sarmatian_IA	0.406829	1.028	-0.028	0.013	0.013
LG	China_YR_MN	Russia_MLBA_Sintashta	0.375797	1.024	-0.024	0.011	0.011
LG	China_YR_MN	Russia_Tagar.SG	0.382743	1.031	-0.031	0.014	0.014
LG	China_YR_MN	Russia_Samara_EBA_Yamnaya	0.418487	1.026	-0.026	0.012	0.012
LG	China_Upper_YR_LN	Kazakhstan_Kangju.SG	0.0188632	1.029	-0.029	0.018	0.018
LG	China_Upper_YR_LN	Mongolia_EBA_Chemurchek_2	0.00694302	1.042	-0.042	0.015	0.015
LG	China_Upper_YR_LN	Kyrgyzstan_TianShan_Hun.SG	0.00480121	1.045	-0.045	0.018	0.018
LG	China_Upper_YR_LN	Russia_Sarmatian.SG	0.0111404	1.036	-0.036	0.013	0.013
LG	China_Upper_YR_LN	Kazakhstan_Sarmatian_IA	0.00569014	1.033	-0.033	0.013	0.013
LG	China_Upper_YR_LN	Russia_MLBA_Sintashta	0.00379623	1.028	-0.028	0.011	0.011
LG	China_Upper_YR_LN	Russia_Tagar.SG	0.00424946	1.037	-0.037	0.014	0.014
LG	China_Upper_YR_LN	Russia_Samara_EBA_Yamnaya	0.00563642	1.032	-0.032	0.012	0.012
LG	China_Upper_YR_IA	Kazakhstan_Kangju.SG	0.890959	1.031	-0.031	0.019	0.019
LG	China_Upper_YR_IA	Mongolia_EBA_Chemurchek_2	0.858647	1.021	-0.021	0.016	0.016
LG	China_Upper_YR_IA	Kyrgyzstan_TianShan_Hun.SG	0.882063	1.027	-0.027	0.019	0.019
LG	China_Upper_YR_IA	Russia_Sarmatian.SG	0.981529	1.022	-0.022	0.014	0.014
LG	China_Upper_YR_IA	Kazakhstan_Sarmatian_IA	0.872135	1.02	-0.02	0.014	0.014
LG	China_Upper_YR_IA	Russia_MLBA_Sintashta	0.897023	1.019	-0.019	0.012	0.012
LG	China_Upper_YR_IA	Russia_Tagar.SG	0.872856	1.021	-0.021	0.015	0.015
LG	China_Upper_YR_IA	Russia_Samara_EBA_Yamnaya	0.900944	1.019	-0.019	0.013	0.013
D. Two-way modeling of YR_LBIA populations (Using YR-related populations and ANA-related populations as sources )
Target	Ref1	Ref2	P value	Coeff1	Coeff2	std.err1	std.err2
JXNT	China_YR_LN	China_AR_EN	0.244253	1.047	-0.047	0.138	0.138
JXNT	China_YR_LN	Russia_DevilsCave_N.SG	0.292229	0.994	0.006	0.126	0.126
JXNT	China_YR_LN	Mongolia_North_N	0.298361	0.98	0.02	0.076	0.076
JXNT	China_YR_LN	Mongolia_East_N	0.310724	0.99	0.01	0.092	0.092
JXNT	China_YR_MN	China_AR_EN	0.953902	1.197	-0.197	0.178	0.178
JXNT	China_YR_MN	Russia_DevilsCave_N.SG	0.661251	1.454	-0.454	0.252	0.252
JXNT	China_YR_MN	Mongolia_North_N	0.556906	1.231	-0.231	0.114	0.114
JXNT	China_YR_MN	Mongolia_East_N	0.496064	1.297	-0.297	0.144	0.144
JXNT	China_Upper_YR_IA	China_AR_EN	0.79772	1.037	-0.037	0.141	0.141
JXNT	China_Upper_YR_IA	Russia_DevilsCave_N.SG	0.24939	1.08	-0.08	0.164	0.164
JXNT	China_Upper_YR_IA	Mongolia_North_N	0.248072	1.069	-0.069	0.097	0.097
JXNT	China_Upper_YR_IA	Mongolia_East_N	0.204323	1.053	-0.053	0.108	0.108
JXNT	China_Shimao_LN	China_AR_EN	0.543415	1.098	-0.098	0.188	0.188
JXNT	China_Shimao_LN	Russia_DevilsCave_N.SG	0.769647	1.268	-0.268	0.219	0.219
JXNT	China_Shimao_LN	Mongolia_North_N	0.91439	1.232	-0.232	0.125	0.125
JXNT	China_Shimao_LN	Mongolia_East_N	0.920925	1.271	-0.271	0.147	0.147
LG	China_YR_LN	China_AR_EN	0.728752	1.17	-0.17	0.133	0.133
LG	China_YR_LN	Russia_DevilsCave_N.SG	0.292891	0.986	0.014	0.128	0.128
LG	China_YR_LN	Mongolia_North_N	0.314042	0.944	0.056	0.072	0.072
LG	China_YR_LN	Mongolia_East_N	0.414985	0.981	0.019	0.085	0.085
LG	China_YR_MN	China_AR_EN	0.914419	1.435	-0.435	0.218	0.218
LG	China_YR_MN	Mongolia_North_N	0.428034	1.244	-0.244	0.12	0.12
LG	China_YR_MN	Mongolia_East_N	0.573176	1.328	-0.328	0.145	0.145
LG	China_Upper_YR_IA	China_AR_EN	0.972297	1.182	-0.182	0.17	0.17
LG	China_Upper_YR_IA	Russia_DevilsCave_N.SG	0.758667	1.112	-0.112	0.162	0.162
LG	China_Upper_YR_IA	Mongolia_North_N	0.712204	1.057	-0.057	0.096	0.096
LG	China_Upper_YR_IA	Mongolia_East_N	0.802619	1.072	-0.072	0.106	0.106
LG	China_Shimao_LN	China_AR_EN	0.459632	1.386	-0.386	0.269	0.269
LG	China_Shimao_LN	Russia_DevilsCave_N.SG	0.818548	1.327	-0.327	0.228	0.228
LG	China_Shimao_LN	Mongolia_North_N	0.828038	1.214	-0.214	0.122	0.122
LG	China_Shimao_LN	Mongolia_East_N	0.862166	1.268	-0.268	0.146	0.146
E. Three-way modeling of YR-LBIA populations (Using YR-related populations, Southeast Asian populations, and Eurasian steppe-related populations as sources )
Target	Ref1	Ref2	Ref3	P value	Coeff1	Coeff2	Coeff3	std.err1	std.err2	std.err3
JXNT	China_YR_LN	Ami.DG	Kazakhstan_Kangju.SG	0.0824903	1.096	-0.087	-0.01	0.097	0.085	0.019
JXNT	China_YR_LN	Ami.DG	Mongolia_EBA_Chemurchek_2	0.209947	1.047	-0.043	-0.004	0.062	0.053	0.015
JXNT	China_YR_LN	Atayal.DG	Kazakhstan_Kangju.SG	0.0740057	1.075	-0.069	-0.006	0.092	0.083	0.018
JXNT	China_YR_LN	Atayal.DG	Mongolia_EBA_Chemurchek_2	0.208772	1.042	-0.039	-0.004	0.059	0.051	0.015
JXNT	China_YR_LN	Tanshishan	Kazakhstan_Kangju.SG	0.0460829	1	-0.02	0.02	0.185	0.185	0.02
JXNT	China_YR_LN	Tanshishan	Mongolia_EBA_Chemurchek_2	0.142916	0.994	-0.009	0.015	0.089	0.084	0.016
JXNT	China_YR_LN	Xitoucun	Kazakhstan_Kangju.SG	0.0323714	1.137	-0.154	0.017	0.141	0.136	0.019
JXNT	China_YR_LN	Xitoucun	Mongolia_EBA_Chemurchek_2	0.277417	1.083	-0.092	0.009	0.074	0.07	0.015
JXNT	China_YR_LN	Thai.DG	Kazakhstan_Kangju.SG	0.0712343	1.119	-0.129	0.01	0.178	0.191	0.021
JXNT	China_YR_LN	Thai.DG	Mongolia_EBA_Chemurchek_2	0.170006	1.002	-0.003	0.001	0.088	0.094	0.015
JXNT	China_YR_MN	Ami.DG	Kazakhstan_Kangju.SG	0.321763	0.947	0.066	-0.013	0.087	0.076	0.02
JXNT	China_YR_MN	Ami.DG	Mongolia_EBA_Chemurchek_2	0.386471	0.973	0.053	-0.025	0.063	0.052	0.017
JXNT	China_YR_MN	Atayal.DG	Kazakhstan_Kangju.SG	0.363409	0.936	0.078	-0.014	0.08	0.071	0.019
JXNT	China_YR_MN	Atayal.DG	Mongolia_EBA_Chemurchek_2	0.405885	0.974	0.052	-0.026	0.061	0.05	0.017
JXNT	China_YR_MN	Tanshishan	Kazakhstan_Kangju.SG	0.737188	0.997	0.027	-0.023	0.139	0.133	0.024
JXNT	China_YR_MN	Tanshishan	Mongolia_EBA_Chemurchek_2	0.516256	1.013	0.02	-0.032	0.091	0.083	0.02
JXNT	China_YR_MN	Xitoucun	Kazakhstan_Kangju.SG	0.0870894	0.932	0.065	0.003	0.112	0.106	0.02
JXNT	China_YR_MN	Xitoucun	Mongolia_EBA_Chemurchek_2	0.247327	1.057	-0.026	-0.031	0.079	0.072	0.018
JXNT	China_YR_MN	Thai.DG	Kazakhstan_Kangju.SG	0.288155	1.002	0.02	-0.022	0.158	0.167	0.02
JXNT	China_YR_MN	Thai.DG	Mongolia_EBA_Chemurchek_2	0.337718	0.992	0.044	-0.036	0.102	0.105	0.015
JXNT	China_Upper_YR_LN	Ami.DG	Kazakhstan_Kangju.SG	0.00133077	0.83	0.168	0.003	0.082	0.071	0.019
JXNT	China_Upper_YR_LN	Ami.DG	Mongolia_EBA_Chemurchek_2	0.0765496	0.917	0.11	-0.027	0.061	0.049	0.017
JXNT	China_Upper_YR_LN	Atayal.DG	Kazakhstan_Kangju.SG	0.00344925	0.817	0.184	-0.001	0.079	0.07	0.018
JXNT	China_Upper_YR_LN	Atayal.DG	Mongolia_EBA_Chemurchek_2	0.124349	0.911	0.116	-0.027	0.059	0.048	0.017
JXNT	China_Upper_YR_LN	Tanshishan	Kazakhstan_Kangju.SG	0.0854393	0.714	0.295	-0.009	0.12	0.114	0.021
JXNT	China_Upper_YR_LN	Tanshishan	Mongolia_EBA_Chemurchek_2	0.168108	0.841	0.191	-0.032	0.082	0.072	0.019
JXNT	China_Upper_YR_LN	Xitoucun	Kazakhstan_Kangju.SG	0.0074798	0.841	0.151	0.008	0.102	0.097	0.018
JXNT	China_Upper_YR_LN	Xitoucun	Mongolia_EBA_Chemurchek_2	0.17961	0.951	0.084	-0.034	0.072	0.064	0.017
JXNT	China_Upper_YR_LN	Thai.DG	Kazakhstan_Kangju.SG	0.000148639	0.934	0.09	-0.025	0.226	0.237	0.021
JXNT	China_Upper_YR_LN	Thai.DG	Mongolia_EBA_Chemurchek_2	0.023421	0.953	0.097	-0.05	0.103	0.104	0.015
JXNT	China_Upper_YR_IA	Ami.DG	Kazakhstan_Kangju.SG	0.0225529	1.086	-0.055	-0.031	0.122	0.105	0.025
JXNT	China_Upper_YR_IA	Ami.DG	Mongolia_EBA_Chemurchek_2	0.77868	1.155	-0.105	-0.049	0.086	0.07	0.022
JXNT	China_Upper_YR_IA	Atayal.DG	Kazakhstan_Kangju.SG	0.0191885	1.062	-0.036	-0.026	0.119	0.104	0.024
JXNT	China_Upper_YR_IA	Atayal.DG	Mongolia_EBA_Chemurchek_2	0.777564	1.143	-0.096	-0.047	0.08	0.065	0.021
JXNT	China_Upper_YR_IA	Tanshishan	Kazakhstan_Kangju.SG	0.168837	1.019	0.005	-0.024	0.177	0.167	0.025
JXNT	China_Upper_YR_IA	Tanshishan	Mongolia_EBA_Chemurchek_2	0.941336	1.092	-0.065	-0.028	0.104	0.093	0.021
JXNT	China_Upper_YR_IA	Xitoucun	Kazakhstan_Kangju.SG	0.020149	1.059	-0.046	-0.012	0.156	0.144	0.024
JXNT	China_Upper_YR_IA	Xitoucun	Mongolia_EBA_Chemurchek_2	0.717174	1.126	-0.1	-0.025	0.093	0.084	0.019
JXNT	China_Upper_YR_IA	Thai.DG	Kazakhstan_Kangju.SG	0.0389513	1.297	-0.287	-0.01	0.266	0.276	0.024
JXNT	China_Upper_YR_IA	Thai.DG	Mongolia_EBA_Chemurchek_2	0.759294	1.205	-0.182	-0.024	0.13	0.132	0.017
JXNT	China_Shimao_LN	Ami.DG	Kazakhstan_Kangju.SG	0.201508	0.874	0.125	0.001	0.082	0.072	0.02
JXNT	China_Shimao_LN	Ami.DG	Mongolia_EBA_Chemurchek_2	0.76196	0.905	0.096	0	0.059	0.051	0.017
JXNT	China_Shimao_LN	Atayal.DG	Kazakhstan_Kangju.SG	0.205724	0.878	0.123	-0.002	0.079	0.071	0.02
JXNT	China_Shimao_LN	Atayal.DG	Mongolia_EBA_Chemurchek_2	0.792815	0.909	0.092	-0.001	0.058	0.05	0.017
JXNT	China_Shimao_LN	Tanshishan	Kazakhstan_Kangju.SG	0.617862	0.905	0.09	0.005	0.129	0.129	0.022
JXNT	China_Shimao_LN	Tanshishan	Mongolia_EBA_Chemurchek_2	0.731685	0.909	0.091	0	0.083	0.077	0.019
JXNT	China_Shimao_LN	Xitoucun	Kazakhstan_Kangju.SG	0.313768	0.898	0.101	0.001	0.116	0.11	0.021
JXNT	China_Shimao_LN	Xitoucun	Mongolia_EBA_Chemurchek_2	0.589659	0.915	0.093	-0.008	0.07	0.065	0.017
JXNT	China_Shimao_LN	Thai.DG	Kazakhstan_Kangju.SG	0.106529	0.92	0.099	-0.02	0.156	0.167	0.023
JXNT	China_Shimao_LN	Thai.DG	Mongolia_EBA_Chemurchek_2	0.722238	0.871	0.153	-0.024	0.085	0.09	0.017
LG	China_YR_LN	Ami.DG	Kazakhstan_Kangju.SG	0.939882	1.114	-0.099	-0.016	0.085	0.075	0.018
LG	China_YR_LN	Ami.DG	Mongolia_EBA_Chemurchek_2	0.206952	1.006	-0.015	0.009	0.065	0.055	0.015
LG	China_YR_LN	Atayal.DG	Kazakhstan_Kangju.SG	0.925576	1.087	-0.075	-0.011	0.075	0.067	0.017
LG	China_YR_LN	Atayal.DG	Mongolia_EBA_Chemurchek_2	0.217335	0.996	-0.007	0.01	0.058	0.05	0.014
LG	China_YR_LN	Tanshishan	Kazakhstan_Kangju.SG	0.476333	0.975	-0.004	0.028	0.178	0.171	0.021
LG	China_YR_LN	Tanshishan	Mongolia_EBA_Chemurchek_2	0.0515057	0.979	-0.017	0.038	0.082	0.077	0.016
LG	China_YR_LN	Xitoucun	Kazakhstan_Kangju.SG	0.897367	1.15	-0.143	-0.006	0.105	0.1	0.017
LG	China_YR_LN	Xitoucun	Mongolia_EBA_Chemurchek_2	0.31476	1.031	-0.052	0.02	0.075	0.071	0.014
LG	China_YR_LN	Thai.DG	Kazakhstan_Kangju.SG	0.804262	1.032	-0.03	-0.002	0.149	0.159	0.018
LG	China_YR_LN	Thai.DG	Mongolia_EBA_Chemurchek_2	0.328535	0.87	0.13	0	0.09	0.097	0.015
LG	China_YR_MN	Ami.DG	Kazakhstan_Kangju.SG	0.914903	0.936	0.085	-0.021	0.076	0.065	0.019
LG	China_YR_MN	Ami.DG	Mongolia_EBA_Chemurchek_2	0.4418	0.919	0.094	-0.013	0.063	0.052	0.017
LG	China_YR_MN	Atayal.DG	Kazakhstan_Kangju.SG	0.947739	0.932	0.091	-0.023	0.069	0.061	0.018
LG	China_YR_MN	Atayal.DG	Mongolia_EBA_Chemurchek_2	0.470937	0.923	0.091	-0.014	0.059	0.049	0.017
LG	China_YR_MN	Tanshishan	Kazakhstan_Kangju.SG	0.772702	0.914	0.1	-0.014	0.133	0.126	0.022
LG	China_YR_MN	Tanshishan	Mongolia_EBA_Chemurchek_2	0.114967	0.993	0.017	-0.011	0.097	0.087	0.02
LG	China_YR_MN	Xitoucun	Mongolia_EBA_Chemurchek_2	0.298034	0.986	0.033	-0.019	0.082	0.074	0.017
LG	China_YR_MN	Thai.DG	Kazakhstan_Kangju.SG	0.965939	0.831	0.212	-0.043	0.123	0.127	0.017
LG	China_YR_MN	Thai.DG	Mongolia_EBA_Chemurchek_2	0.494657	0.844	0.194	-0.038	0.103	0.106	0.014
LG	China_Upper_YR_LN	Ami.DG	Mongolia_EBA_Chemurchek_2	0.118029	0.859	0.154	-0.013	0.055	0.045	0.016
LG	China_Upper_YR_LN	Atayal.DG	Mongolia_EBA_Chemurchek_2	0.224222	0.861	0.154	-0.014	0.05	0.041	0.016
LG	China_Upper_YR_LN	Tanshishan	Kazakhstan_Kangju.SG	0.171206	0.671	0.325	0.004	0.104	0.099	0.021
LG	China_Upper_YR_LN	Tanshishan	Mongolia_EBA_Chemurchek_2	0.0247079	0.811	0.196	-0.007	0.077	0.068	0.019
LG	China_Upper_YR_LN	Xitoucun	Kazakhstan_Kangju.SG	0.104927	0.858	0.16	-0.019	0.089	0.083	0.019
LG	China_Upper_YR_LN	Xitoucun	Mongolia_EBA_Chemurchek_2	0.106783	0.883	0.137	-0.02	0.068	0.06	0.016
LG	China_Upper_YR_LN	Thai.DG	Kazakhstan_Kangju.SG	0.0252863	0.81	0.229	-0.039	0.152	0.159	0.018
LG	China_Upper_YR_LN	Thai.DG	Mongolia_EBA_Chemurchek_2	0.0546645	0.782	0.27	-0.052	0.095	0.097	0.015
LG	China_Upper_YR_IA	Ami.DG	Kazakhstan_Kangju.SG	0.850573	1.077	-0.041	-0.036	0.097	0.083	0.023
LG	China_Upper_YR_IA	Ami.DG	Mongolia_EBA_Chemurchek_2	0.810628	1.066	-0.039	-0.027	0.077	0.064	0.02
LG	China_Upper_YR_IA	Atayal.DG	Kazakhstan_Kangju.SG	0.846856	1.055	-0.022	-0.033	0.087	0.075	0.021
LG	China_Upper_YR_IA	Atayal.DG	Mongolia_EBA_Chemurchek_2	0.813869	1.05	-0.026	-0.024	0.071	0.059	0.019
LG	China_Upper_YR_IA	Tanshishan	Kazakhstan_Kangju.SG	0.4304	0.925	0.09	-0.014	0.147	0.138	0.024
LG	China_Upper_YR_IA	Tanshishan	Mongolia_EBA_Chemurchek_2	0.364362	1.01	-0.01	-0.001	0.1	0.091	0.021
LG	China_Upper_YR_IA	Xitoucun	Kazakhstan_Kangju.SG	0.76335	1.081	-0.033	-0.048	0.119	0.11	0.024
LG	China_Upper_YR_IA	Xitoucun	Mongolia_EBA_Chemurchek_2	0.706057	1.058	-0.044	-0.014	0.091	0.084	0.018
LG	China_Upper_YR_IA	Thai.DG	Kazakhstan_Kangju.SG	0.845398	1.099	-0.072	-0.027	0.183	0.19	0.022
LG	China_Upper_YR_IA	Thai.DG	Mongolia_EBA_Chemurchek_2	0.796499	1.04	-0.021	-0.019	0.122	0.127	0.017
LG	China_Shimao_LN	Ami.DG	Kazakhstan_Kangju.SG	0.947593	0.909	0.101	-0.01	0.079	0.068	0.02
LG	China_Shimao_LN	Ami.DG	Mongolia_EBA_Chemurchek_2	0.814892	0.873	0.119	0.008	0.058	0.048	0.017
LG	China_Shimao_LN	Atayal.DG	Kazakhstan_Kangju.SG	0.973775	0.906	0.106	-0.012	0.072	0.063	0.019
LG	China_Shimao_LN	Atayal.DG	Mongolia_EBA_Chemurchek_2	0.88263	0.874	0.119	0.007	0.055	0.046	0.016
LG	China_Shimao_LN	Tanshishan	Kazakhstan_Kangju.SG	0.83951	0.834	0.153	0.014	0.112	0.109	0.02
LG	China_Shimao_LN	Tanshishan	Mongolia_EBA_Chemurchek_2	0.556991	0.88	0.104	0.016	0.081	0.074	0.018
LG	China_Shimao_LN	Xitoucun	Kazakhstan_Kangju.SG	0.935936	0.934	0.095	-0.028	0.098	0.089	0.022
LG	China_Shimao_LN	Xitoucun	Mongolia_EBA_Chemurchek_2	0.898601	0.876	0.127	-0.003	0.069	0.063	0.017
LG	China_Shimao_LN	Thai.DG	Kazakhstan_Kangju.SG	0.937947	0.836	0.199	-0.035	0.14	0.147	0.019
LG	China_Shimao_LN	Thai.DG	Mongolia_EBA_Chemurchek_2	0.925831	0.777	0.25	-0.028	0.087	0.092	0.015

## Sheet: J
Table S1J. Information on ancient sites from China used in this study.
Site Symbol	Full name of the site	Groups	Longitude	Latitude	References
Guanzhuang	Guanzhuang Site	Guanzhuang	113.376	34.8508	This Study
Lusixi	Lusixi site	Lusixi	111.935	﻿34.662	MaaScienceBulletin2024
LG	LuoHeGuXiang Site	YR_LBIA	113.546	33.5228	NingNatureCommunications2020
JXNT	JiaoZuoNieCun Site	YR_LBIA	113.247	35.1272	NingNatureCommunications2020
WG	WangGou Site	YR_MN	113.396	34.8137	NingNatureCommunications2020
PLT	PingLiangTai Site	YR_LN	114.924	33.7082	NingNatureCommunications2020
Shimao	ShiMao Site	Shimao_LN	110.307	38.5642	NingNatureCommunications2020
MZG	MiaoZiGou Site	Miaozigou_MN	117.467	41.7409	NingNatureCommunications2020
Yumin	Yumin Site	Yumin	114.324	42.07	YangScience2020
Lajia	Lajia Site	Upper_YR_LN	103.417	36.4416	NingNatureCommunications2020
DCZ	DaCaoZi Site	Upper_YR_IA	102.11	36.5085	NingNatureCommunications2020
EDJZ	ErDaoJingZi Site	WLR_LN	123.232	45.7386	NingNatureCommunications2020
BLS	BanLaShan Site	WLR_MN	122.819	47.4688	NingNatureCommunications2020
MGS	MoGuShan Site	AR_Xianbei_IA	117.716	49.4959	NingNatureCommunications2020
ZLNE	ZhaLaiNuoEr Site	AR_EN	117.733	49.5167	NingNatureCommunications2020
LTS	LongTouShan Site	WLR_BA	121.662	38.9934	NingNatureCommunications2020
Xiaojingshan	Xiaojingshan Site	Shandong_EN	117.532	36.8453	YangScience2020
Xiaogao	Xiaogao Site	China_NEastAsia_Coastal_EN	118.057	36.8392	YangScience2020
Bianbian	Bianbiandong Cave Site	China_NEastAsia_Coastal_EN	118.471	36.062	YangScience2020
Boshan	Boshan Site	China_NEastAsia_Coastal_EN	117.857	36.4169	YangScience2020
Liangdao	Liangdao site	China_SE_Island_EN	119.927	26.1511	YangScience2020
Qihe	Qihe Cave Site	China_SE_Coastal_EN	117.03	25.0916	YangScience2020
Longlin	LongLin, Laomaocao Cave Site	Longlin	104.783	24.3667	WangCell2021
Taiwan_hanben	Hanben Site	Taiwan_Hanben_IA	121.47	24.46	WangNature2021
Dushan	Dushan Cave Site	China_Guangxi_Dushan_N	107.13	23.6	WangCell2021
Baojianshan	Baojianshan Cave Site	China_Guangxi_Baojianshan_N	106.85	22.34	WangCell2021
Layi	Layi (Laba) Cave Site	China_Guangxi_Layi	107.62	24.08	WangCell2021
BaBanQinCen	meta-population from four archeological sites	Guangxi_Historical	NA	NA	WangCell2021
GaoHuaHua	meta-population from three archaeological sites	Guangxi_Historical	NA	NA	WangCell2021
Shenxian	Shenxian Cave Site	Guangxi_Shenxian_Sui_Tang	107.59	23.31	WangCell2021
Yiyang	Yiyang Cave Site	Guangxi_Yiyang_NorthernAndSouthernDynasties_Sui_Tang	107.5	23.33	WangCell2021
SuoGang	Suogang site	China_SEastAsia_Island_LN	119.6	23.5	YangScience2020
Tanshishan	Tanshishan site	China_SEastAsia_Coastal_LN	119.1	26.2	YangScience2020
Xitoucun	Xitoucun Site	China_SEastAsia_Coastal_LN	119.1	26.2	YangScience2020
Baojianshan	Baojianshan Cave Site	China_Guangxi_Baojianshan_N	106.85	22.34	WangCell2021
Chuanyun	Chuanyun Cave Site	China_SEastAsia_Coastal_Historic	117.3	25.6	YangScience2020

[truncated: 1 more sheets: K]
