# Supplementary material for: Genomic insights into the complex demographic history and inbreeding phenomena during Zhou Dynasty on the Central Plains of China
Source: Frontiers journal article supplement (doi:10.3389/fmicb.2024.1471740), 2024-09-13
Supplement: Table_2.XLSX [file Table_2.XLSX]

## Sheet: A
Table S2A. f4(Mbuti, Reference; X, Guanzhuang) to evaluate the genetic divergence between the Guanzhuang population and population X. The 'Reference' group consists of 287 ancient and contemporary populations, while population X includes ancient populations from various regions of East Asia. |Z|>3 indicates the significant values, highlighted in Datas by blue (positive) and red (negative) ; 2<|Z|…
f4(Mbuti, Reference; Guanzhuang, China_AR_EN)
pop1	pop2	pop3	pop4	f4	Z	ABAB	ABBA	SNPs
Mbuti	CHS	Guanzhuang	China_AR_EN	-0.023	-6.155	9714	10171	190299
Mbuti	KHV	Guanzhuang	China_AR_EN	-0.0218	-5.902	9686	10117	190299
Mbuti	CHB	Guanzhuang	China_AR_EN	-0.0213	-5.824	9738	10161	190299
Mbuti	CDX	Guanzhuang	China_AR_EN	-0.0209	-5.613	9693	10106	190299
Mbuti	RIA	Guanzhuang	China_AR_EN	-0.0206	-5.331	9591	9996	189325
Mbuti	Atayal	Guanzhuang	China_AR_EN	-0.0269	-4.894	9332	9848	185633
Mbuti	Miao	Guanzhuang	China_AR_EN	-0.0204	-4.403	9456	9850	185968
Mbuti	Dai	Guanzhuang	China_AR_EN	-0.0178	-4.35	9714	10067	190299
Mbuti	Han	Guanzhuang	China_AR_EN	-0.0187	-4.271	9496	9859	185977
Mbuti	JPT	Guanzhuang	China_AR_EN	-0.0156	-4.239	9801	10112	190299
Mbuti	Kinh	Guanzhuang	China_AR_EN	-0.0182	-4.093	9480	9830	185947
Mbuti	Dusun	Guanzhuang	China_AR_EN	-0.0197	-4.083	9432	9811	185956
Mbuti	Igorot	Guanzhuang	China_AR_EN	-0.0195	-4.029	9454	9829	185961
Mbuti	Vietnam_N	Guanzhuang	China_AR_EN	-0.0477	-3.689	1744	1919	36518
Mbuti	Cambodian	Guanzhuang	China_AR_EN	-0.0165	-3.631	9398	9714	185963
Mbuti	Taiwan_Hanben_IA	Guanzhuang	China_AR_EN	0.004163	-3.611	9694	9990	188957
Mbuti	Nepal_Chokhopani_2800BP	Guanzhuang	China_AR_EN	-0.022	-3.576	9689	10125	190104
Mbuti	ONG	Guanzhuang	China_AR_EN	-0.0161	-3.53	9369	9676	189311
Mbuti	Burmese	Guanzhuang	China_AR_EN	-0.016	-3.528	9449	9756	185969
Mbuti	LaCen	Guanzhuang	China_AR_EN	0.007024	-3.38	6439	6752	129015
Mbuti	GaoHuaHua	Guanzhuang	China_AR_EN	0.005951	-3.297	8024	8345	158743
Mbuti	China_YR_LBIA	Guanzhuang	China_AR_EN	-0.0149	-3.281	9736	10030	188951
Mbuti	China_YR_MN	Guanzhuang	China_AR_EN	-0.0159	-3.249	9747	10062	189207
Mbuti	Tibetan	Guanzhuang	China_AR_EN	-0.0146	-3.237	9465	9746	185963
Mbuti	Ami	Guanzhuang	China_AR_EN	-0.0156	-3.196	9528	9830	185955
Mbuti	China_Lahu	Guanzhuang	China_AR_EN	-0.0153	-3.191	9456	9750	185958
Mbuti	Dungan	Guanzhuang	China_AR_EN	-0.0159	-3.105	9732	10046	190258
Mbuti	Naxi	Guanzhuang	China_AR_EN	-0.0133	-3.037	9576	9834	185979
Mbuti	Mongolia_Xiongnu_o1	Guanzhuang	China_AR_EN	-0.0149	-3.034	9723	10018	190162
Mbuti	China_YR_LN	Guanzhuang	China_AR_EN	-0.0127	-3.024	9817	10069	190120
Mbuti	Maori	Guanzhuang	China_AR_EN	-0.0157	-2.997	9131	9421	185441
Mbuti	LG	Guanzhuang	China_AR_EN	0.005861	-2.996	8769	9083	171679
Mbuti	Malaysia_historical	Guanzhuang	China_AR_EN	-0.0249	-2.765	4043	4249	80830
Mbuti	China_Upper_YR_IA	Guanzhuang	China_AR_EN	-0.0144	-2.746	9383	9656	182724
Mbuti	China_Upper_YR_LN	Guanzhuang	China_AR_EN	-0.0129	-2.733	9734	9987	188688
Mbuti	Thai	Guanzhuang	China_AR_EN	-0.0119	-2.651	9462	9691	185957
Mbuti	JXNT	Guanzhuang	China_AR_EN	0.005554	-2.63	8957	9223	173907
Mbuti	Hawaiian	Guanzhuang	China_AR_EN	-0.014	-2.595	9433	9701	185393
Mbuti	Vietnam_historical	Guanzhuang	China_AR_EN	-0.0305	-2.565	2126	2260	42722
Mbuti	Korean	Guanzhuang	China_AR_EN	-0.0118	-2.561	9573	9801	185966
Mbuti	BaBanQinCen	Guanzhuang	China_AR_EN	0.007006	-2.448	5794	5996	114298
Mbuti	Guam_LateUnai_Ritidian	Guanzhuang	China_AR_EN	-0.0422	-2.426	916	997	19404
Mbuti	Taiwan_Liangdao_LatePaleolithic	Guanzhuang	China_AR_EN	-0.0334	-2.351	1309	1400	25962
Mbuti	Qihe3	Guanzhuang	China_AR_EN	0.00797	-2.34	5030	5221	101722
Mbuti	Liangdao2	Guanzhuang	China_AR_EN	0.006755	-2.323	7135	7362	142243
Mbuti	Vietnam_LN	Guanzhuang	China_AR_EN	-0.0217	-2.3	3135	3274	63380
Mbuti	Xitoucun	Guanzhuang	China_AR_EN	0.008261	-2.297	4190	4353	84814
Mbuti	Kongo	Guanzhuang	China_AR_EN	-0.0109	-2.261	7350	7511	185438
Mbuti	Tonga_2500BP	Guanzhuang	China_AR_EN	-0.028	-2.255	1880	1988	38323
Mbuti	China_SEastAsia_Island_EN	Guanzhuang	China_AR_EN	-0.0138	-2.175	7328	7533	146016
Mbuti	Thailand_IA	Guanzhuang	China_AR_EN	-0.0167	-2.162	5055	5227	102134
Mbuti	Laos_LN_BA	Guanzhuang	China_AR_EN	-0.014	-2.092	7132	7334	141333
Mbuti	English	Guanzhuang	China_AR_EN	-0.0093	-1.973	9104	9276	185969
Mbuti	China_SEastAsia_Coastal_LN	Guanzhuang	China_AR_EN	-0.0136	-1.944	5106	5247	101929
Mbuti	Vietnam_BA_all	Guanzhuang	China_AR_EN	-0.0163	-1.874	3852	3979	76339
Mbuti	Tonga_2700BP	Guanzhuang	China_AR_EN	-0.0267	-1.866	1444	1524	29225
Mbuti	Indonesia_LN_BA_IA	Guanzhuang	China_AR_EN	-0.0365	-1.863	823	885	17215
Mbuti	Georgia_Satsurblia	Guanzhuang	China_AR_EN	-0.012	-1.825	6687	6850	138071
Mbuti	Lebanon_MBA	Guanzhuang	China_AR_EN	-0.0078	-1.79	9185	9330	188931
Mbuti	Igbo	Guanzhuang	China_AR_EN	-0.0069	-1.732	7459	7562	185966
Mbuti	China_Shimao_LN	Guanzhuang	China_AR_EN	-0.0086	-1.706	9775	9945	188177
Mbuti	Shenxian	Guanzhuang	China_AR_EN	0.008302	-1.612	4931	5065	98999
Mbuti	Russia_Samara_EBA_Yamnaya_published2	Guanzhuang	China_AR_EN	-0.0104	-1.604	8751	8935	178842
Mbuti	Sherpa	Guanzhuang	China_AR_EN	-0.0076	-1.578	9602	9748	185968
Mbuti	Madiga	Guanzhuang	China_AR_EN	-0.0069	-1.547	9169	9296	185966
Mbuti	China_SEastAsia_Coastal_Historic	Guanzhuang	China_AR_EN	-0.0175	-1.478	2251	2331	45890
Mbuti	Italy_Sicily_HG_OrienteC	Guanzhuang	China_AR_EN	-0.0385	-1.474	438	473	9264
Mbuti	Baojianshan	Guanzhuang	China_AR_EN	0.007715	-1.472	6234	6377	125058
Mbuti	Yi	Guanzhuang	China_AR_EN	-0.0065	-1.437	9647	9774	185964
Mbuti	Dushan	Guanzhuang	China_AR_EN	0.008803	-1.414	4283	4391	86553
Mbuti	Vietnam_BA_DongSonCulture	Guanzhuang	China_AR_EN	-0.0133	-1.413	3171	3256	67473
Mbuti	Iranian	Guanzhuang	China_AR_EN	-0.0063	-1.387	9045	9160	185969
Mbuti	Liangdao1	Guanzhuang	China_AR_EN	0.010807	-1.368	2829	2914	59234
Mbuti	Bergamo	Guanzhuang	China_AR_EN	-0.0071	-1.347	9038	9168	185529
Mbuti	Russia_IA_EarlySarmatian	Guanzhuang	China_AR_EN	-0.0091	-1.347	5857	5965	119425
Mbuti	China_Wuzhuangguoliang_LN	Guanzhuang	China_AR_EN	-0.0299	-1.338	422	447	8264
Mbuti	Turkey_MLBA_AssyrianColonyPeriod	Guanzhuang	China_AR_EN	-0.0088	-1.332	5995	6102	123913
Mbuti	Taiwan_Gongguan	Guanzhuang	China_AR_EN	-0.0105	-1.324	5363	5477	105388
Mbuti	China_SEastAsia_Coastal_EN	Guanzhuang	China_AR_EN	-0.0157	-1.31	2261	2333	46469
Mbuti	Bengali	Guanzhuang	China_AR_EN	-0.0059	-1.303	9206	9315	185960
Mbuti	French	Guanzhuang	China_AR_EN	-0.0056	-1.268	9135	9237	185977
Mbuti	Spain_ElMiron	Guanzhuang	China_AR_EN	-0.011	-1.257	4450	4550	94475
Mbuti	Turkey_N	Guanzhuang	China_AR_EN	-0.0051	-1.237	9185	9279	187887
Mbuti	Relli_1	Guanzhuang	China_AR_EN	-0.0065	-1.23	9201	9321	185796
Mbuti	Italy_North_Villabruna_HG	Guanzhuang	China_AR_EN	-0.0088	-1.221	6797	6918	140289
Mbuti	Samaritan	Guanzhuang	China_AR_EN	-0.0063	-1.195	8946	9060	184971
Mbuti	Japanese	Guanzhuang	China_AR_EN	-0.0053	-1.194	9638	9741	185977
Mbuti	Polish	Guanzhuang	China_AR_EN	-0.0063	-1.175	9116	9231	185645
Mbuti	Turkmenistan_IA	Guanzhuang	China_AR_EN	-0.0076	-1.169	7779	7898	160458
Mbuti	Palestinian	Guanzhuang	China_AR_EN	-0.005	-1.166	8951	9041	185976
Mbuti	Hungarian	Guanzhuang	China_AR_EN	-0.0053	-1.158	9118	9215	185963
Mbuti	Cretan	Guanzhuang	China_AR_EN	-0.0052	-1.133	9067	9161	185946
Mbuti	Greece_Minoan_Lassithi	Guanzhuang	China_AR_EN	-0.006	-1.132	8057	8153	166627
Mbuti	Basque	Guanzhuang	China_AR_EN	-0.005	-1.102	9102	9193	185967
Mbuti	Myanmar_LN_BA_published_lc	Guanzhuang	China_AR_EN	-0.0588	-1.1	96	108	2174
Mbuti	Lemande	Guanzhuang	China_AR_EN	-0.0043	-1.099	7456	7521	185962
Mbuti	Hungary_IA_Scythian	Guanzhuang	China_AR_EN	-0.006	-1.069	8049	8146	166301
Mbuti	Vietnam_BA	Guanzhuang	China_AR_EN	-0.0112	-1.068	2594	2652	51068
Mbuti	Yiyang	Guanzhuang	China_AR_EN	0.012473	-1.06	1985	2038	40232
Mbuti	Turkey_EBA_II	Guanzhuang	China_AR_EN	-0.0058	-1.036	8130	8225	169559
Mbuti	Tanshishan	Guanzhuang	China_AR_EN	0.009804	-1.035	2926	2986	58562
Mbuti	Bulgaria_C	Guanzhuang	China_AR_EN	-0.0048	-1.008	8266	8346	169616
Mbuti	Turkish	Guanzhuang	China_AR_EN	-0.0043	-1.004	9106	9184	185968
Mbuti	Nepal_Mebrak_2125BP	Guanzhuang	China_AR_EN	-0.0072	-0.997	6388	6480	123849
Mbuti	BedouinB	Guanzhuang	China_AR_EN	-0.0042	-0.924	8944	9019	185952
Mbuti	Longlin	Guanzhuang	China_AR_EN	0.014722	-0.917	1378	1416	28382
Mbuti	Russia_AfontovaGora3	Guanzhuang	China_AR_EN	-0.0111	-0.898	1790	1831	37752
Mbuti	Tuscan_1	Guanzhuang	China_AR_EN	-0.004	-0.897	9112	9186	185963
Mbuti	Vanuatu_2900BP	Guanzhuang	China_AR_EN	-0.0139	-0.895	1144	1176	22730
Mbuti	Japan_Jomon	Guanzhuang	China_AR_EN	-0.0064	-0.891	7667	7765	151519
Mbuti	Spanish	Guanzhuang	China_AR_EN	-0.0039	-0.843	9067	9138	185952
Mbuti	Philippines_RedSlippedPottery	Guanzhuang	China_AR_EN	-0.033	-0.842	163	174	3315
Mbuti	Vietnam_N_published	Guanzhuang	China_AR_EN	-0.0169	-0.836	737	762	15088
Mbuti	Chechen	Guanzhuang	China_AR_EN	-0.0045	-0.828	9104	9187	185528
Mbuti	Ukraine_Scythian	Guanzhuang	China_AR_EN	-0.0047	-0.826	8864	8948	179688
Mbuti	Laos_BA	Guanzhuang	China_AR_EN	-0.0084	-0.813	2928	2978	58190
Mbuti	Sardinian	Guanzhuang	China_AR_EN	-0.0034	-0.798	9112	9174	185977
Mbuti	Greece_Minoan_Odigitria	Guanzhuang	China_AR_EN	-0.0096	-0.798	1984	2022	41242
Mbuti	Brahui	Guanzhuang	China_AR_EN	-0.0035	-0.794	9060	9123	185960
Mbuti	Georgia_Kotias	Guanzhuang	China_AR_EN	-0.005	-0.794	9286	9379	190187
Mbuti	Greece_BA_Mycenaean	Guanzhuang	China_AR_EN	-0.0064	-0.794	3297	3339	73772
Mbuti	Tajik	Guanzhuang	China_AR_EN	-0.0034	-0.775	9163	9226	185969
Mbuti	Germany_EBA_Unetice	Guanzhuang	China_AR_EN	-0.0038	-0.769	8525	8590	173782
Mbuti	Orcadian	Guanzhuang	China_AR_EN	-0.0035	-0.754	9152	9217	185965
Mbuti	Armenian	Guanzhuang	China_AR_EN	-0.0032	-0.718	9081	9139	185970
Mbuti	Vietnam_N_all_published	Guanzhuang	China_AR_EN	-0.013	-0.718	894	918	18100
Mbuti	Balochi	Guanzhuang	China_AR_EN	-0.0032	-0.708	9121	9180	185950
Mbuti	GZ_all_merge_o1	Guanzhuang	China_AR_EN	-0.0282	-0.708	182	192	3657
Mbuti	Kusunda	Guanzhuang	China_AR_EN	-0.0033	-0.705	9421	9485	185954
Mbuti	Mongolia_Bulgan_EarlyMedieval	Guanzhuang	China_AR_EN	-0.0048	-0.686	7248	7318	141886
Mbuti	Russia_Alan	Guanzhuang	China_AR_EN	-0.0032	-0.66	9290	9349	189140
Mbuti	Suogang	Guanzhuang	China_AR_EN	0.026003	-0.646	456	471	9300
Mbuti	China_SEastAsia_Island_LN	Guanzhuang	China_AR_EN	-0.0168	-0.646	456	471	9300
Mbuti	Russia_LBA_1	Guanzhuang	China_AR_EN	-0.0141	-0.627	522	537	10926
Mbuti	Russia_EarlyMedieval_Heshui_Mohe_1	Guanzhuang	China_AR_EN	-0.0078	-0.624	2163	2197	42304
Mbuti	Germany_CordedWare	Guanzhuang	China_AR_EN	-0.0029	-0.608	9092	9144	184625
Mbuti	Estonian	Guanzhuang	China_AR_EN	-0.0027	-0.603	9178	9227	185968
Mbuti	Georgian	Guanzhuang	China_AR_EN	-0.0026	-0.592	9109	9157	185973
Mbuti	Vanuatu_3000BP	Guanzhuang	China_AR_EN	-0.0096	-0.551	1001	1021	19884
Mbuti	Jew_Yemenite	Guanzhuang	China_AR_EN	-0.0024	-0.548	8980	9024	185966
Mbuti	Nepal_Samdzong_1500BP	Guanzhuang	China_AR_EN	-0.0026	-0.545	9817	9869	190218
Mbuti	Armenia_LBA	Guanzhuang	China_AR_EN	-0.0047	-0.537	3920	3957	82650
Mbuti	Turkmenistan_C_Namazga_1d	Guanzhuang	China_AR_EN	-0.0155	-0.536	309	319	6776
Mbuti	Sweden_Motala_HG	Guanzhuang	China_AR_EN	-0.0027	-0.517	8491	8537	172388
Mbuti	Makrani	Guanzhuang	China_AR_EN	-0.0022	-0.484	9063	9103	185967
Mbuti	Brahmin	Guanzhuang	China_AR_EN	-0.002	-0.452	9156	9193	185970
Mbuti	Mongolia_Selenge_Xiongnu	Guanzhuang	China_AR_EN	-0.0031	-0.449	7674	7722	147435
Mbuti	China_WLR_LN	Guanzhuang	China_AR_EN	-0.0026	-0.434	8061	8103	155744
Mbuti	Burusho	Guanzhuang	China_AR_EN	-0.0019	-0.432	9208	9243	185961
Mbuti	Israel_Natufian_published	Guanzhuang	China_AR_EN	-0.0058	-0.404	1368	1383	28775
Mbuti	Albanian	Guanzhuang	China_AR_EN	-0.0022	-0.402	9119	9159	185760
Mbuti	China_Miaozigou_MN	Guanzhuang	China_AR_EN	-0.0041	-0.378	2935	2959	57101
Mbuti	Druze	Guanzhuang	China_AR_EN	-0.0017	-0.376	9053	9084	185956
Mbuti	Russia_Tagar	Guanzhuang	China_AR_EN	-0.0015	-0.352	9468	9497	189564
Mbuti	Adygei	Guanzhuang	China_AR_EN	-0.0016	-0.349	9146	9175	185959
Mbuti	Kalash	Guanzhuang	China_AR_EN	-0.0015	-0.31	9193	9220	185972
Mbuti	Vanuatu_2900BP_all	Guanzhuang	China_AR_EN	-0.0042	-0.306	1746	1761	34616
Mbuti	Kazakhstan_Wusun	Guanzhuang	China_AR_EN	-0.0015	-0.253	8511	8536	172430
Mbuti	Kazakhstan_Kipchak1	Guanzhuang	China_AR_EN	-0.0018	-0.249	6362	6385	128339
Mbuti	Lezgin	Guanzhuang	China_AR_EN	-0.001	-0.226	9133	9152	185973
Mbuti	Russia_Srubnaya	Guanzhuang	China_AR_EN	-0.0009	-0.217	9214	9232	186403
Mbuti	Uyghur	Guanzhuang	China_AR_EN	-0.0009	-0.204	9383	9400	185965
Mbuti	China_WLR_BA	Guanzhuang	China_AR_EN	-0.0015	-0.198	5345	5361	102950
Mbuti	Laos_Hoabinhian	Guanzhuang	China_AR_EN	-0.0015	-0.172	4098	4111	83195
Mbuti	Irula	Guanzhuang	China_AR_EN	-0.0007	-0.17	9229	9243	185964
Mbuti	Russia_NorthOssetian	Guanzhuang	China_AR_EN	-0.0007	-0.16	9167	9181	185972
Mbuti	Kapu	Guanzhuang	China_AR_EN	-0.0007	-0.16	9250	9263	185963
Mbuti	Russia_Samara_EBA_Yamnaya_published	Guanzhuang	China_AR_EN	-0.0013	-0.155	4549	4561	93458
Mbuti	Russia_Samara_EBA_Yamnaya	Guanzhuang	China_AR_EN	-0.0006	-0.13	8961	8972	181991
Mbuti	Russia_Ust_Ishim	Guanzhuang	China_AR_EN	-0.0007	-0.13	8583	8595	175879
Mbuti	Turkmenistan_C_Namazga	Guanzhuang	China_AR_EN	-0.0009	-0.122	5272	5281	111054
Mbuti	Russia_Potapovka	Guanzhuang	China_AR_EN	-0.0019	-0.119	1263	1268	25165
Mbuti	Estonia_CordedWare	Guanzhuang	China_AR_EN	-0.0006	-0.102	8319	8329	170647
Mbuti	China_Tianyuan	Guanzhuang	China_AR_EN	-0.0007	-0.102	6955	6966	141129
Mbuti	Boshan	Guanzhuang	China_AR_EN	0.006496	-0.073	8124	8132	157406
Mbuti	Moldova_Glinoe_Scythian	Guanzhuang	China_AR_EN	-0.0003	-0.071	8970	8976	181277
Mbuti	Iran_GanjDareh_N	Guanzhuang	China_AR_EN	-0.0003	-0.053	8520	8524	174728
Mbuti	Russia_EBA_o1	Guanzhuang	China_AR_EN	-0.0005	-0.042	1823	1825	36725
Mbuti	Spain_C	Guanzhuang	China_AR_EN	0	0.012	9185	9184	186194
Mbuti	Germany_BellBeaker	Guanzhuang	China_AR_EN	0.0002	0.059	9259	9255	187147
Mbuti	Iran_C_SehGabi	Guanzhuang	China_AR_EN	0.0003	0.063	8243	8238	168763
Mbuti	Spain_HG	Guanzhuang	China_AR_EN	0.0005	0.071	7895	7888	158829
Mbuti	Kazakhstan_Karluk_1	Guanzhuang	China_AR_EN	0.0005	0.076	8994	8985	177178
Mbuti	Slovakia_Poprad	Guanzhuang	China_AR_EN	0.0009	0.102	4032	4024	81417
Mbuti	Spain_MLN	Guanzhuang	China_AR_EN	0.0004	0.105	9121	9113	185062
Mbuti	Russian	Guanzhuang	China_AR_EN	0.0005	0.113	9233	9224	185974
Mbuti	Icelandic	Guanzhuang	China_AR_EN	0.0006	0.127	9195	9184	185972
Mbuti	Jordanian	Guanzhuang	China_AR_EN	0.0006	0.155	9002	8991	185978
Mbuti	Mongola	Guanzhuang	China_AR_EN	0.0007	0.159	9662	9648	185967
Mbuti	Kazakhstan_Kangju_o1	Guanzhuang	China_AR_EN	0.0011	0.16	5994	5981	123129
Mbuti	Kazakhstan_Turk	Guanzhuang	China_AR_EN	0.001	0.161	8650	8633	172588
Mbuti	Russia_Abkhasian	Guanzhuang	China_AR_EN	0.0008	0.18	9165	9150	185964
Mbuti	Bougainville	Guanzhuang	China_AR_EN	0.001	0.203	9347	9329	185904
Mbuti	Bulgaria_BeliBreyag_EBA	Guanzhuang	China_AR_EN	0.0025	0.211	2051	2041	42838
Mbuti	Mongolia_Arkhangai_XiongnuEarlyMedieval_1	Guanzhuang	China_AR_EN	0.0014	0.213	7350	7329	149284
Mbuti	Mala	Guanzhuang	China_AR_EN	0.001	0.23	9255	9238	185975
Mbuti	Pathan	Guanzhuang	China_AR_EN	0.001	0.231	9190	9171	185971
Mbuti	Turkmenistan_Gonur_BA_1	Guanzhuang	China_AR_EN	0.0012	0.233	7537	7518	153783
Mbuti	China_Xinjian_IA	Guanzhuang	China_AR_EN	0.0015	0.248	6833	6812	135541
Mbuti	Punjabi	Guanzhuang	China_AR_EN	0.0011	0.262	9234	9214	185982
Mbuti	Israel_C	Guanzhuang	China_AR_EN	0.0013	0.283	8550	8529	175001
Mbuti	Germany_EN_LBK	Guanzhuang	China_AR_EN	0.0012	0.297	9189	9166	186562
Mbuti	Mongolia_Arkhangai_XiongnuEarlyMedieval_3	Guanzhuang	China_AR_EN	0.0014	0.31	9614	9588	187158
Mbuti	Finnish	Guanzhuang	China_AR_EN	0.0014	0.316	9247	9221	185976
Mbuti	China_AR_IA	Guanzhuang	China_AR_EN	0.0081	0.317	497	489	9581
Mbuti	Bulgarian	Guanzhuang	China_AR_EN	0.0015	0.326	9156	9129	185939
Mbuti	Mongolia_Chalcolithic_Afanasievo_1	Guanzhuang	China_AR_EN	0.0024	0.338	6037	6008	122547
Mbuti	Taiwan_Hanben_IA_lc	Guanzhuang	China_AR_EN	0.0078	0.368	630	620	11951
Mbuti	Russia_MLBA_Sintashta	Guanzhuang	China_AR_EN	0.0015	0.379	9285	9257	187413
Mbuti	Kazakhstan_Nomad_IA_o	Guanzhuang	China_AR_EN	0.0043	0.396	2312	2292	47715
Mbuti	Kazakhstan_Karakhanid	Guanzhuang	China_AR_EN	0.003	0.4	5341	5309	105575
Mbuti	Russia_MA1_HG	Guanzhuang	China_AR_EN	0.003	0.402	6581	6542	132431
Mbuti	Sindhi_Pakistan	Guanzhuang	China_AR_EN	0.0019	0.404	9198	9164	185962
Mbuti	Russia_Kalmykia_EBA_Yamnaya	Guanzhuang	China_AR_EN	0.0021	0.409	8884	8847	180731
Mbuti	Yadava	Guanzhuang	China_AR_EN	0.002	0.442	9263	9226	185964
Mbuti	Russia_Afanasievo	Guanzhuang	China_AR_EN	0.0022	0.465	9438	9396	189500
Mbuti	Russia_Siberia_Lena_EBA_o	Guanzhuang	China_AR_EN	0.0127	0.556	576	562	11230
Mbuti	Mongolia_Arkhangai_XiongnuEarlyMedieval_2	Guanzhuang	China_AR_EN	0.0036	0.584	6957	6907	140580
Mbuti	Kashmiri_Pandit	Guanzhuang	China_AR_EN	0.0031	0.584	9190	9133	185550
Mbuti	China_NEastAsia_Coastal_EN	Guanzhuang	China_AR_EN	0.0029	0.589	8972	8921	172031
Mbuti	Shandong_EN	Guanzhuang	China_AR_EN	0.00544	0.623	8126	8071	156010
Mbuti	Poland_Globular_Amphora_published	Guanzhuang	China_AR_EN	0.0144	0.633	575	559	11867
Mbuti	Russia_SaltovoMayaki	Guanzhuang	China_AR_EN	0.0127	0.64	744	726	15632
Mbuti	Armenia_EBA	Guanzhuang	China_AR_EN	0.0033	0.642	8124	8071	165632
Mbuti	Kazakhstan_Kimak	Guanzhuang	China_AR_EN	0.0083	0.669	1841	1811	36089
Mbuti	USA_Anzick_realigned	Guanzhuang	China_AR_EN	0.0043	0.707	9770	9686	188638
Mbuti	Czech	Guanzhuang	China_AR_EN	0.0038	0.711	9217	9147	185604
Mbuti	Mongolia_Arkhangai_EarlyMedieval	Guanzhuang	China_AR_EN	0.003	0.718	9356	9301	187151
Mbuti	Bulgaria_IA	Guanzhuang	China_AR_EN	0.0064	0.745	4824	4763	97988
Mbuti	Armenia_C	Guanzhuang	China_AR_EN	0.0038	0.772	8361	8297	169970
Mbuti	Jordan_EBA	Guanzhuang	China_AR_EN	0.0048	0.829	6670	6607	137548
Mbuti	USA_WA_Kennewick	Guanzhuang	China_AR_EN	0.0063	0.853	5830	5757	113577
Mbuti	Hazara	Guanzhuang	China_AR_EN	0.004	0.862	9469	9395	185955
Mbuti	Mongolia_Khentii_EIA_SlabGrave	Guanzhuang	China_AR_EN	0.0141	0.876	1126	1095	21735
Mbuti	Russia_Andronovo	Guanzhuang	China_AR_EN	0.0046	0.91	9342	9257	188662
Mbuti	Papuan	Guanzhuang	China_AR_EN	0.0044	0.956	9311	9229	185979
Mbuti	Kurumba	Guanzhuang	China_AR_EN	0.0052	1.009	9216	9120	184798
Mbuti	Russia_HG_Karelia	Guanzhuang	China_AR_EN	0.0064	1.019	8370	8263	167878
Mbuti	USA_Ancient_Beringian	Guanzhuang	China_AR_EN	0.0067	1.074	9903	9771	190284
Mbuti	Russia_MBA_Poltavka	Guanzhuang	China_AR_EN	0.0067	1.119	7445	7345	150101
Mbuti	Spain_EN	Guanzhuang	China_AR_EN	0.0056	1.134	8595	8499	175039
Mbuti	Altaian	Guanzhuang	China_AR_EN	0.0066	1.215	9604	9478	185619
Mbuti	Russia_AfontovaGora2	Guanzhuang	China_AR_EN	0.0297	1.325	583	550	11544
Mbuti	Kazakhstan_IA_Saka_dup	Guanzhuang	China_AR_EN	0.0208	1.331	1275	1223	25333
Mbuti	Jordan_PPNB_published	Guanzhuang	China_AR_EN	0.0206	1.335	1190	1141	24146
Mbuti	Kazakhstan_Botai_Eneolithic	Guanzhuang	China_AR_EN	0.0083	1.344	7563	7439	149311
Mbuti	Bulgaria_Varna_C	Guanzhuang	China_AR_EN	0.013	1.345	3239	3156	66558
Mbuti	Kazakhstan_Nomad_IA	Guanzhuang	China_AR_EN	0.0094	1.369	6600	6478	131508
Mbuti	Kazakhstan_TianShan_Saka	Guanzhuang	China_AR_EN	0.0284	1.404	639	604	12673
Mbuti	Khonda_Dora	Guanzhuang	China_AR_EN	0.008	1.428	9403	9254	185744
Mbuti	Mongolia_Uvurkhangai_EIALatEMedieval	Guanzhuang	China_AR_EN	0.0079	1.441	8377	8245	161416
Mbuti	Mongolia_Dundgobi_LatEMedieval	Guanzhuang	China_AR_EN	0.0099	1.453	6891	6756	133212
Mbuti	Chane	Guanzhuang	China_AR_EN	0.0084	1.457	9651	9490	185704
Mbuti	Mongolia_Xiongnu_o2	Guanzhuang	China_AR_EN	0.0091	1.493	8838	8678	175147
Mbuti	Kazakhstan_Kumsay_EBA	Guanzhuang	China_AR_EN	0.0083	1.509	7807	7678	155642
Mbuti	Kazakhstan_Central_Steppe_EMBA	Guanzhuang	China_AR_EN	0.0077	1.521	9735	9587	190248
Mbuti	Russia_Karasuk_oRISE	Guanzhuang	China_AR_EN	0.0068	1.523	9604	9475	189958
Mbuti	Cree1	Guanzhuang	China_AR_EN	0.0081	1.532	9499	9347	185624
Mbuti	Mongolia_Sukhbaatar_MLBA	Guanzhuang	China_AR_EN	0.0125	1.538	5142	5015	99063
Mbuti	Australian	Guanzhuang	China_AR_EN	0.0075	1.554	9329	9191	185936
Mbuti	Kazakhstan_Wusun_LateSaka_dup	Guanzhuang	China_AR_EN	0.0193	1.568	1986	1911	39331
Mbuti	Mexico_Zapotec	Guanzhuang	China_AR_EN	0.0078	1.592	9627	9477	185957
Mbuti	Kazakhstan_Central_Saka	Guanzhuang	China_AR_EN	0.0077	1.597	9322	9179	182822
Mbuti	Canada_MDorset	Guanzhuang	China_AR_EN	0.0379	1.635	602	558	11498
Mbuti	Nahua	Guanzhuang	China_AR_EN	0.009	1.637	9626	9455	185767
Mbuti	Kyrgyzstan_TianShan_Hun	Guanzhuang	China_AR_EN	0.0065	1.678	9629	9503	190274
Mbuti	Russia_Mezhovskaya	Guanzhuang	China_AR_EN	0.0104	1.693	8532	8356	171437
Mbuti	Aleut	Guanzhuang	China_AR_EN	0.0078	1.703	9528	9381	185975
Mbuti	China_AmurRiver_LPaleolithic	Guanzhuang	China_AR_EN	0.0102	1.741	7194	7048	139029
Mbuti	Canada_MDorset_published	Guanzhuang	China_AR_EN	0.033	1.759	914	855	17302
Mbuti	China_AmurRiver_BA	Guanzhuang	China_AR_EN	0.0784	1.811	167	142	2925
Mbuti	Pakistan_Loebanr_IA	Guanzhuang	China_AR_EN	0.0072	1.857	9216	9085	184974
Mbuti	Russia_Tuva_IA_AldyBel	Guanzhuang	China_AR_EN	0.0134	1.876	6517	6345	129165
Mbuti	China_WLR_MN	Guanzhuang	China_AR_EN	0.0108	1.939	10029	9815	188932
Mbuti	Mongolia_Selenge_XiongnuMedieval_o1	Guanzhuang	China_AR_EN	0.0219	1.967	2531	2423	48439
Mbuti	Moldova_Cimmerian	Guanzhuang	China_AR_EN	0.0127	1.969	6450	6289	127242
Mbuti	Russia_Siberia_Tenisei_EBA	Guanzhuang	China_AR_EN	0.0148	2.002	6423	6236	124918
Mbuti	Kazakhstan_Nomad_Hun_Sarmatian	Guanzhuang	China_AR_EN	0.0128	2.078	8486	8271	162732
Mbuti	China_AR_Xianbei_IA	Guanzhuang	China_AR_EN	0.0242	2.116	2558	2437	48170
Mbuti	Mongolia_Ulaanbaatar_EIALatEMedieval	Guanzhuang	China_AR_EN	0.0187	2.123	4277	4120	81764
Mbuti	Chukchi	Guanzhuang	China_AR_EN	0.0113	2.155	9553	9340	185785
Mbuti	Mixtec_1	Guanzhuang	China_AR_EN	0.0118	2.162	9591	9367	185359
Mbuti	Russia_BA_Okunevo	Guanzhuang	China_AR_EN	0.0091	2.176	9728	9552	190256
Mbuti	Mongolia_Uvs_EIAXiongnuLateMedival	Guanzhuang	China_AR_EN	0.0099	2.208	9379	9196	184410
Mbuti	Pima	Guanzhuang	China_AR_EN	0.0112	2.247	9683	9469	185950
Mbuti	Daur	Guanzhuang	China_AR_EN	0.0126	2.261	9783	9540	185499
Mbuti	Tubalar	Guanzhuang	China_AR_EN	0.0099	2.29	9600	9412	185977
Mbuti	Mongolia_LBA_Ulaanzukh_2_dup	Guanzhuang	China_AR_EN	0.0162	2.293	7201	6972	137275
Mbuti	Canada_LateDorset	Guanzhuang	China_AR_EN	0.0267	2.297	2503	2373	48408
Mbuti	Russia_KuengaRiver_N_1	Guanzhuang	China_AR_EN	0.0483	2.302	689	625	12962
Mbuti	Mongolia_Khuvsgul_XiongnuLatEMedieval_1	Guanzhuang	China_AR_EN	0.0114	2.304	8819	8620	174170
Mbuti	Mongolia_Bulgan_Xiongnu	Guanzhuang	China_AR_EN	0.0139	2.339	8470	8238	162292
Mbuti	Russia_Chita_BA	Guanzhuang	China_AR_EN	0.0336	2.382	1494	1397	28151
Mbuti	Piapoco	Guanzhuang	China_AR_EN	0.0123	2.446	9672	9437	185952
Mbuti	Surui	Guanzhuang	China_AR_EN	0.0131	2.488	9729	9477	185956
Mbuti	Karitiana	Guanzhuang	China_AR_EN	0.0125	2.493	9697	9458	185972
Mbuti	Russia_IA_2	Guanzhuang	China_AR_EN	0.0182	2.524	7108	6853	138231
Mbuti	Mongolia_Tuv_Xiongnu	Guanzhuang	China_AR_EN	0.0159	2.545	8707	8435	164877
Mbuti	Mongolia_Dornod_PreBronze	Guanzhuang	China_AR_EN	0.0387	2.768	1622	1501	30537
Mbuti	Mongolia_Arkhangai_MLBAtoEIAorMedieval_o	Guanzhuang	China_AR_EN	0.0395	2.8	1738	1606	32198
Mbuti	Kazakhstan_ZevakinoChilikta_IA_2	Guanzhuang	China_AR_EN	0.0284	2.8	2582	2439	50019
Mbuti	Quechua	Guanzhuang	China_AR_EN	0.0139	2.815	9719	9453	185966
Mbuti	Mongolia_Bulgan_LatEMedieval	Guanzhuang	China_AR_EN	0.0198	2.816	6944	6674	131549
Mbuti	Mixe	Guanzhuang	China_AR_EN	0.0132	2.817	9685	9433	185980
Mbuti	Mongolia_Sukhbaatar_MLBAXiongnuLatEMedieval_sister	Guanzhuang	China_AR_EN	0.0665	2.918	571	500	10342
Mbuti	Mongolia_LBA_CenterWest_4_o	Guanzhuang	China_AR_EN	0.0218	2.927	6779	6490	127620
Mbuti	Mongolia_Sukhbaatar_LatEMedieval	Guanzhuang	China_AR_EN	0.0126	2.985	9938	9691	188701
Mbuti	Russia_Blagovechensk_IA	Guanzhuang	China_AR_EN	0.0274	2.999	4144	3923	77635
Mbuti	Mongolia_IA_Xianbei	Guanzhuang	China_AR_EN	0.0229	3.006	6692	6393	127627
Mbuti	Kazakhstan_Nomad_HP	Guanzhuang	China_AR_EN	0.0159	3.027	9676	9373	183915
Mbuti	Russia_IA_Yankovsky	Guanzhuang	China_AR_EN	0.0251	3.028	5509	5238	103517
Mbuti	Mayan	Guanzhuang	China_AR_EN	0.0152	3.058	9738	9447	185948
Mbuti	Russia_Kurma_EBA	Guanzhuang	China_AR_EN	0.0227	3.134	6075	5805	115556
Mbuti	Mongolia_EBA_Chemurchek_2	Guanzhuang	China_AR_EN	0.0188	3.182	7421	7148	147791
Mbuti	Chipewyan	Guanzhuang	China_AR_EN	0.016	3.182	9762	9455	185967
Mbuti	Russia_KolymaRiver_LN_1d	Guanzhuang	China_AR_EN	0.031	3.219	3734	3509	69809
Mbuti	Russia_CentralYakutia_IA	Guanzhuang	China_AR_EN	0.0687	3.239	687	599	12559
Mbuti	Mongolia_Khovd_MLBAXiongnuLatEMedieval	Guanzhuang	China_AR_EN	0.0276	3.339	4619	4371	86398
Mbuti	Mongolia_Tuv_LatEMedieval	Guanzhuang	China_AR_EN	0.0181	3.398	8523	8220	161877
Mbuti	Mongolia_Khovd_MLBAEarlyMedieval	Guanzhuang	China_AR_EN	0.0188	3.401	8734	8412	170020
Mbuti	Russia_Buryatia_Xiongnu_mother	Guanzhuang	China_AR_EN	0.0268	3.455	6303	5975	118518
Mbuti	Kyrgyzstan_Medieval_Nomad_o	Guanzhuang	China_AR_EN	0.0292	3.463	4195	3957	79598
Mbuti	Kazakhstan_IA_Berel_Pazyryk	Guanzhuang	China_AR_EN	0.0192	3.536	8931	8595	172507
Mbuti	Mongolia_Chalcolithic_Afanasievo_2	Guanzhuang	China_AR_EN	0.0266	3.555	5974	5664	113708
Mbuti	Mongolia_Arkhangai_PreBronze	Guanzhuang	China_AR_EN	0.0259	3.572	6682	6345	126043
Mbuti	Mongolia_Tuv_EIA	Guanzhuang	China_AR_EN	0.0306	3.613	5007	4710	93241
Mbuti	Mongolia_EIA_Xiongnu_7	Guanzhuang	China_AR_EN	0.0272	3.691	6548	6202	123422
Mbuti	Mansi	Guanzhuang	China_AR_EN	0.0173	3.722	9611	9283	185972
Mbuti	Eskimo_Sireniki	Guanzhuang	China_AR_EN	0.0186	3.793	9800	9443	185972
Mbuti	Russia_UstIda_LN	Guanzhuang	China_AR_EN	0.0221	3.941	9211	8813	175679
Mbuti	Hezhen	Guanzhuang	China_AR_EN	0.0182	3.967	9860	9507	185972
Mbuti	Mongolia_Uvurkhangai_Xiongnu	Guanzhuang	China_AR_EN	0.023	3.997	8814	8418	166551
Mbuti	Buryat	Guanzhuang	China_AR_EN	0.0178	4.081	10038	9688	190297
Mbuti	Mongolia_Khentii_Xiongnu	Guanzhuang	China_AR_EN	0.0281	4.129	7887	7456	148208
Mbuti	Kazakhstan_GoldenHordeAsian	Guanzhuang	China_AR_EN	0.0255	4.234	9613	9135	180284
Mbuti	Mongolia_Dornod_Xiongnu	Guanzhuang	China_AR_EN	0.0289	4.288	8226	7764	154133
Mbuti	Eskimo_Naukan	Guanzhuang	China_AR_EN	0.0213	4.329	9823	9414	185969
Mbuti	Mongolia_Arkhangai_Xiongnu_o	Guanzhuang	China_AR_EN	0.0303	4.361	8325	7836	156255
Mbuti	China_HMMH_MN	Guanzhuang	China_AR_EN	0.0323	4.384	6493	6087	121867
Mbuti	Mongolia_EIA_8	Guanzhuang	China_AR_EN	0.0339	4.486	6600	6167	124332
Mbuti	China_AmurRiver_Mesolithic	Guanzhuang	China_AR_EN	0.0308	4.522	5707	5366	107663
Mbuti	Mongolia_Umungobi_LatEMedieval	Guanzhuang	China_AR_EN	0.0222	4.557	9336	8930	176574
Mbuti	Mongolia_Khentii_LatEMedieval	Guanzhuang	China_AR_EN	0.0266	4.637	8503	8063	160676
Mbuti	Russia_Siberia_UP	Guanzhuang	China_AR_EN	0.038	4.64	5126	4751	97020
Mbuti	China_AmurRiver_EarlyN	Guanzhuang	China_AR_EN	0.0316	4.645	6204	5823	117876
Mbuti	Eskimo_Chaplin	Guanzhuang	China_AR_EN	0.0257	4.652	9891	9394	185800
Mbuti	Russia_AginBuryat_N	Guanzhuang	China_AR_EN	0.0451	4.668	3519	3215	64414
Mbuti	Russia_DevilsCave_N	Guanzhuang	China_AR_EN	0.0235	4.723	10197	9729	190247
Mbuti	Koryak	Guanzhuang	China_AR_EN	0.0248	4.726	10096	9608	190291
Mbuti	Mongolia_EBA_Ulgii_1_dup	Guanzhuang	China_AR_EN	0.031	4.74	8489	7979	159480
Mbuti	Russia_Shamanka_EBA	Guanzhuang	China_AR_EN	0.0253	4.928	9286	8827	174785
Mbuti	Ulchi	Guanzhuang	China_AR_EN	0.0234	4.987	9906	9453	185956
Mbuti	Kazakhstan_Korgantas_IA	Guanzhuang	China_AR_EN	0.0347	4.991	7876	7347	147108
Mbuti	Mongolia_Khuvsgul_XiongnuLatEMedieval_2	Guanzhuang	China_AR_EN	0.0238	5.002	9432	8993	179030
Mbuti	Russia_UstIda_EBA	Guanzhuang	China_AR_EN	0.0321	5.073	7617	7143	144107
Mbuti	Russia_KadalinkaRiver_N	Guanzhuang	China_AR_EN	0.0336	5.223	9684	9054	178229
Mbuti	Russia_AngaraRiver_EN	Guanzhuang	China_AR_EN	0.0356	5.397	9691	9025	180086
Mbuti	Mongolia_Khentii_Xiongnu_daughter	Guanzhuang	China_AR_EN	0.0427	5.462	5403	4960	100807
Mbuti	Yakut	Guanzhuang	China_AR_EN	0.0261	5.483	9902	9399	185962
Mbuti	Russia_Krasnoyarsk_BA	Guanzhuang	China_AR_EN	0.0349	5.5	10255	9564	190224
Mbuti	Oroqen	Guanzhuang	China_AR_EN	0.0267	5.659	9979	9461	185959
Mbuti	Russia_Buryatia_PreBronze	Guanzhuang	China_AR_EN	0.0388	5.667	7382	6831	136701
Mbuti	Russia_Lokomotiv_Eneolithic	Guanzhuang	China_AR_EN	0.0326	5.706	9038	8467	168985
Mbuti	Kazakhstan_Berel_IA_o3	Guanzhuang	China_AR_EN	0.0266	5.751	9759	9253	183049
Mbuti	Russia_CentralYakutia_LN	Guanzhuang	China_AR_EN	0.035	5.776	10025	9347	184990
Mbuti	China_NEastAsia_Inland_EN	Guanzhuang	China_AR_EN	0.0446	6.013	7080	6476	132950
Mbuti	Yumin	Guanzhuang	China_AR_EN	0.0446	6.013	7080	6476	132950
Mbuti	Mongolia_Sukhbaatar_MLBAXiongnuLatEMedieval	Guanzhuang	China_AR_EN	0.0263	6.025	9946	9435	186285
Mbuti	Russia_MN_Boisman	Guanzhuang	China_AR_EN	0.0302	6.063	8857	8337	165074
Mbuti	Russia_KuengaRiver_N_2	Guanzhuang	China_AR_EN	0.0404	6.143	9231	8515	169894
Mbuti	Mongolia_Bulgan_EarlyMedievalLatEMedieval	Guanzhuang	China_AR_EN	0.0288	6.302	9735	9189	183337
Mbuti	Russia_KolymaRiver_LN	Guanzhuang	China_AR_EN	0.0328	6.364	10224	9575	190272
Mbuti	Mongolia_LBA_Ulaanzukh_2	Guanzhuang	China_AR_EN	0.0374	6.5	7858	7292	147014
Mbuti	Russia_Siberia_Irkutsk_EBA	Guanzhuang	China_AR_EN	0.0382	6.717	8531	7904	158050
Mbuti	Russia_UstBelaya_Angara	Guanzhuang	China_AR_EN	0.0313	6.83	9650	9064	181086
Mbuti	China_WLR_BA_o	Guanzhuang	China_AR_EN	0.0491	6.888	7183	6510	131950
Mbuti	Russia_ArgunRiver_M	Guanzhuang	China_AR_EN	0.0435	6.937	10193	9344	187100
Mbuti	Russia_LenaRiver_EN	Guanzhuang	China_AR_EN	0.0469	7.003	8804	8015	160425
Mbuti	Russia_Buryatia_Xiongnu	Guanzhuang	China_AR_EN	0.0342	7.145	9530	8899	177619
Mbuti	Greenland_Saqqaq	Guanzhuang	China_AR_EN	0.0461	7.22	9451	8618	175964
Mbuti	Mongolia_Dornod_LatEMedieval	Guanzhuang	China_AR_EN	0.0334	7.271	9803	9170	183340
Mbuti	China_AmurRiver_N	Guanzhuang	China_AR_EN	0.042	7.384	7202	6621	134590
Mbuti	Even	Guanzhuang	China_AR_EN	0.0361	7.836	10047	9346	185973
Mbuti	Mongolia_EIA_SlabGrave_1	Guanzhuang	China_AR_EN	0.0341	7.845	9891	9239	183608
Mbuti	Russia_Shamanka_Eneolithic	Guanzhuang	China_AR_EN	0.0335	8.28	10264	9598	190271
Mbuti	Mongolia_East_N	Guanzhuang	China_AR_EN	0.0476	8.498	8756	7960	160363
Mbuti	Mongolia_North_N	Guanzhuang	China_AR_EN	0.0453	9.217	9494	8672	174849

## Sheet: B
Table S2B. f4(Mbuti, Reference; X, Guanzhuang) to evaluate the genetic divergence between the Guanzhuang population and population X. The 'Reference' group consists of 287 ancient and contemporary populations, while population X includes ancient populations from various regions of East Asia. |Z|>3 indicates the significant values, highlighted in Datas by blue (positive) and red (negative) ; 2<|Z|…
f4(Mbuti, Reference; Guanzhuang, China_AR_Xianbei_IA)
pop1	pop2	pop3	pop4	f4	Z	ABAB	ABBA	SNPs
Mbuti	CHS	Guanzhuang	China_AR_Xianbei_IA	-0.0301	-7.389	7876	8365	154143
Mbuti	CDX	Guanzhuang	China_AR_Xianbei_IA	-0.0283	-6.853	7862	8321	154143
Mbuti	KHV	Guanzhuang	China_AR_Xianbei_IA	-0.0277	-6.736	7862	8310	154143
Mbuti	CHB	Guanzhuang	China_AR_Xianbei_IA	-0.0274	-6.727	7908	8353	154143
Mbuti	RIA	Guanzhuang	China_AR_Xianbei_IA	-0.0247	-5.819	7788	8183	153332
Mbuti	Dai	Guanzhuang	China_AR_Xianbei_IA	-0.026	-5.745	7880	8302	154142
Mbuti	Kinh	Guanzhuang	China_AR_Xianbei_IA	-0.0293	-5.666	7644	8106	150516
Mbuti	Taiwan_Hanben_IA	Guanzhuang	China_AR_Xianbei_IA	-0.0255	-5.55	7816	8225	152771
Mbuti	JPT	Guanzhuang	China_AR_Xianbei_IA	-0.0224	-5.374	7958	8321	154143
Mbuti	China_YR_LN	Guanzhuang	China_AR_Xianbei_IA	-0.0254	-5.29	7921	8335	153979
Mbuti	Dusun	Guanzhuang	China_AR_Xianbei_IA	-0.0277	-5.195	7615	8049	150515
Mbuti	China_Lahu	Guanzhuang	China_AR_Xianbei_IA	-0.0268	-5.116	7652	8073	150515
Mbuti	Miao	Guanzhuang	China_AR_Xianbei_IA	-0.0257	-5.022	7706	8112	150529
Mbuti	China_YR_LBIA	Guanzhuang	China_AR_Xianbei_IA	-0.0251	-5.005	7840	8243	152905
Mbuti	Han	Guanzhuang	China_AR_Xianbei_IA	-0.0237	-4.948	7721	8096	150534
Mbuti	Atayal	Guanzhuang	China_AR_Xianbei_IA	-0.0294	-4.744	7659	8123	150247
Mbuti	Burmese	Guanzhuang	China_AR_Xianbei_IA	-0.0232	-4.578	7651	8015	150528
Mbuti	JXNT	Guanzhuang	China_AR_Xianbei_IA	-0.0289	-4.567	7127	7551	139748
Mbuti	Igorot	Guanzhuang	China_AR_Xianbei_IA	-0.0251	-4.545	7674	8069	150525
Mbuti	Cambodian	Guanzhuang	China_AR_Xianbei_IA	-0.0232	-4.467	7611	7972	150527
Mbuti	Ami	Guanzhuang	China_AR_Xianbei_IA	-0.0239	-4.435	7709	8087	150517
Mbuti	China_SEastAsia_Coastal_LN	Guanzhuang	China_AR_Xianbei_IA	-0.0335	-4.296	3903	4173	78734
Mbuti	LG	Guanzhuang	China_AR_Xianbei_IA	-0.0259	-4.275	7036	7409	138166
Mbuti	Thai	Guanzhuang	China_AR_Xianbei_IA	-0.0215	-4.2	7642	7977	150524
Mbuti	Tonga_2500BP	Guanzhuang	China_AR_Xianbei_IA	-0.0599	-4.144	1428	1610	28860
Mbuti	Laos_LN_BA	Guanzhuang	China_AR_Xianbei_IA	-0.0311	-4.143	5683	6048	114001
Mbuti	China_YR_MN	Guanzhuang	China_AR_Xianbei_IA	-0.0225	-4.084	7905	8270	153078
Mbuti	Nepal_Chokhopani_2800BP	Guanzhuang	China_AR_Xianbei_IA	-0.0275	-4.077	7839	8283	153993
Mbuti	GaoHuaHua	Guanzhuang	China_AR_Xianbei_IA	-0.0258	-3.988	6461	6803	127120
Mbuti	Dungan	Guanzhuang	China_AR_Xianbei_IA	-0.0218	-3.962	7895	8246	154113
Mbuti	ONG	Guanzhuang	China_AR_Xianbei_IA	-0.0208	-3.958	7620	7944	153317
Mbuti	Qihe3	Guanzhuang	China_AR_Xianbei_IA	-0.0358	-3.913	3912	4202	79713
Mbuti	Mongolia_Xiongnu_o1	Guanzhuang	China_AR_Xianbei_IA	-0.0207	-3.84	7883	8217	154048
Mbuti	Sherpa	Guanzhuang	China_AR_Xianbei_IA	-0.019	-3.823	7710	8009	150522
Mbuti	Vietnam_BA_all	Guanzhuang	China_AR_Xianbei_IA	-0.0387	-3.77	2836	3065	57472
Mbuti	BaBanQinCen	Guanzhuang	China_AR_Xianbei_IA	-0.0278	-3.641	4471	4727	89465
Mbuti	Tonga_2700BP	Guanzhuang	China_AR_Xianbei_IA	-0.0602	-3.6	1072	1209	21853
Mbuti	Japanese	Guanzhuang	China_AR_Xianbei_IA	-0.0175	-3.554	7748	8024	150531
Mbuti	Xitoucun	Guanzhuang	China_AR_Xianbei_IA	-0.0321	-3.547	3201	3414	64907
Mbuti	Naxi	Guanzhuang	China_AR_Xianbei_IA	-0.0176	-3.546	7751	8029	150534
Mbuti	Yi	Guanzhuang	China_AR_Xianbei_IA	-0.0183	-3.481	7761	8050	150527
Mbuti	Baojianshan	Guanzhuang	China_AR_Xianbei_IA	-0.0281	-3.435	4855	5135	97779
Mbuti	Turkmenistan_C_Namazga_1d	Guanzhuang	China_AR_Xianbei_IA	-0.1101	-3.39	221	276	5398
Mbuti	Tanshishan	Guanzhuang	China_AR_Xianbei_IA	-0.0374	-3.219	2206	2377	44778
Mbuti	China_WLR_LN	Guanzhuang	China_AR_Xianbei_IA	-0.0214	-3.193	6367	6645	123685
Mbuti	China_Shimao_LN	Guanzhuang	China_AR_Xianbei_IA	-0.0188	-3.146	7894	8197	152243
Mbuti	China_Upper_YR_LN	Guanzhuang	China_AR_Xianbei_IA	-0.0163	-3.096	7939	8202	152808
Mbuti	Tibetan	Guanzhuang	China_AR_Xianbei_IA	-0.0155	-3.071	7723	7967	150528
Mbuti	Indonesia_LN_BA_IA	Guanzhuang	China_AR_Xianbei_IA	-0.0615	-3.059	658	744	13911
Mbuti	LaCen	Guanzhuang	China_AR_Xianbei_IA	-0.0235	-3.012	5123	5369	101746
Mbuti	Taiwan_Gongguan	Guanzhuang	China_AR_Xianbei_IA	-0.027	-3.004	4102	4329	81340
Mbuti	Hawaiian	Guanzhuang	China_AR_Xianbei_IA	-0.0174	-2.956	7667	7938	150063
Mbuti	Vietnam_BA	Guanzhuang	China_AR_Xianbei_IA	-0.0377	-2.955	1902	2051	38344
Mbuti	China_Upper_YR_IA	Guanzhuang	China_AR_Xianbei_IA	-0.0168	-2.927	7633	7893	147779
Mbuti	Khonda_Dora	Guanzhuang	China_AR_Xianbei_IA	-0.0172	-2.927	7496	7758	150351
Mbuti	Vietnam_historical	Guanzhuang	China_AR_Xianbei_IA	-0.0387	-2.904	1753	1894	34411
Mbuti	Liangdao2	Guanzhuang	China_AR_Xianbei_IA	-0.0223	-2.831	5631	5888	112141
Mbuti	Korean	Guanzhuang	China_AR_Xianbei_IA	-0.0146	-2.797	7804	8035	150526
Mbuti	China_SEastAsia_Coastal_Historic	Guanzhuang	China_AR_Xianbei_IA	-0.0362	-2.731	1712	1840	35470
Mbuti	Shenxian	Guanzhuang	China_AR_Xianbei_IA	-0.0268	-2.707	3853	4066	77103
Mbuti	China_SEastAsia_Island_EN	Guanzhuang	China_AR_Xianbei_IA	-0.0194	-2.694	5818	6048	115267
Mbuti	Shandong_EN	Guanzhuang	China_AR_Xianbei_IA	-0.016	-2.596	6315	6521	123471
Mbuti	Mongolia_Selenge_Xiongnu	Guanzhuang	China_AR_Xianbei_IA	-0.0198	-2.566	6032	6276	117491
Mbuti	Malaysia_historical	Guanzhuang	China_AR_Xianbei_IA	-0.025	-2.562	3334	3505	65490
Mbuti	Nepal_Samdzong_1500BP	Guanzhuang	China_AR_Xianbei_IA	-0.0135	-2.554	7954	8172	154062
Mbuti	Relli_1	Guanzhuang	China_AR_Xianbei_IA	-0.0144	-2.465	7443	7660	150403
Mbuti	China_NEastAsia_Coastal_EN	Guanzhuang	China_AR_Xianbei_IA	-0.0138	-2.459	7084	7282	137456
Mbuti	Thailand_IA	Guanzhuang	China_AR_Xianbei_IA	-0.1171	-2.337	115	146	2466
Mbuti	Taiwan_Liangdao_LatePaleolithic	Guanzhuang	China_AR_Xianbei_IA	-0.0392	-2.334	1072	1159	20486
Mbuti	Boshan	Guanzhuang	China_AR_Xianbei_IA	-0.0171	-2.301	6398	6621	125083
Mbuti	Vietnam_N	Guanzhuang	China_AR_Xianbei_IA	-0.0336	-2.292	1357	1452	27433
Mbuti	Vietnam_LN	Guanzhuang	China_AR_Xianbei_IA	-0.0241	-2.273	2472	2594	50494
Mbuti	Palestinian	Guanzhuang	China_AR_Xianbei_IA	-0.0109	-2.268	7279	7440	150536
Mbuti	Maori	Guanzhuang	China_AR_Xianbei_IA	-0.0127	-2.206	7470	7661	150122
Mbuti	Vanuatu_3000BP	Guanzhuang	China_AR_Xianbei_IA	-0.0436	-2.159	740	807	14905
Mbuti	Russia_AfontovaGora2	Guanzhuang	China_AR_Xianbei_IA	-0.0526	-2.106	426	473	9126
Mbuti	China_SEastAsia_Coastal_EN	Guanzhuang	China_AR_Xianbei_IA	-0.0279	-2.097	1713	1812	35040
Mbuti	Kapu	Guanzhuang	China_AR_Xianbei_IA	-0.0107	-2.096	7456	7618	150524
Mbuti	Vanuatu_2900BP_all	Guanzhuang	China_AR_Xianbei_IA	-0.0311	-1.981	1276	1358	25455
Mbuti	Bougainville	Guanzhuang	China_AR_Xianbei_IA	-0.0107	-1.975	7525	7688	150466
Mbuti	Laos_Hoabinhian	Guanzhuang	China_AR_Xianbei_IA	-0.0187	-1.887	3225	3348	66669
Mbuti	Australian	Guanzhuang	China_AR_Xianbei_IA	-0.0102	-1.882	7469	7624	150496
Mbuti	Kusunda	Guanzhuang	China_AR_Xianbei_IA	-0.0101	-1.873	7646	7802	150515
Mbuti	Vietnam_BA_DongSonCulture	Guanzhuang	China_AR_Xianbei_IA	-0.0196	-1.871	2527	2627	53137
Mbuti	Poland_Globular_Amphora_published	Guanzhuang	China_AR_Xianbei_IA	-0.0499	-1.861	411	454	8853
Mbuti	Igbo	Guanzhuang	China_AR_Xianbei_IA	-0.0083	-1.839	6062	6163	150526
Mbuti	Mongola	Guanzhuang	China_AR_Xianbei_IA	-0.0095	-1.825	7808	7958	150525
Mbuti	Bulgaria_Varna_C	Guanzhuang	China_AR_Xianbei_IA	-0.0209	-1.818	2435	2539	51127
Mbuti	Russia_Potapovka	Guanzhuang	China_AR_Xianbei_IA	-0.0326	-1.817	935	998	19452
Mbuti	Brahui	Guanzhuang	China_AR_Xianbei_IA	-0.0085	-1.813	7390	7516	150524
Mbuti	Slovakia_Poprad	Guanzhuang	China_AR_Xianbei_IA	-0.0179	-1.807	3169	3285	65234
Mbuti	Punjabi	Guanzhuang	China_AR_Xianbei_IA	-0.0085	-1.791	7470	7598	150535
Mbuti	Uyghur	Guanzhuang	China_AR_Xianbei_IA	-0.0087	-1.762	7614	7748	150524
Mbuti	Brahmin	Guanzhuang	China_AR_Xianbei_IA	-0.0086	-1.737	7451	7580	150526
Mbuti	Papuan	Guanzhuang	China_AR_Xianbei_IA	-0.0089	-1.732	7490	7624	150533
Mbuti	Yadava	Guanzhuang	China_AR_Xianbei_IA	-0.0087	-1.719	7480	7610	150515
Mbuti	Turkmenistan_Gonur_BA_1	Guanzhuang	China_AR_Xianbei_IA	-0.0104	-1.709	5962	6088	121951
Mbuti	Guam_LateUnai_Ritidian	Guanzhuang	China_AR_Xianbei_IA	-0.0345	-1.683	715	766	15012
Mbuti	Russia_EarlyMedieval_Heshui_Mohe_1	Guanzhuang	China_AR_Xianbei_IA	-0.0227	-1.652	1648	1725	32642
Mbuti	Myanmar_LN_BA_published_lc	Guanzhuang	China_AR_Xianbei_IA	-0.0929	-1.643	83	100	1724
Mbuti	Burusho	Guanzhuang	China_AR_Xianbei_IA	-0.0082	-1.615	7457	7581	150517
Mbuti	Jordan_EBA	Guanzhuang	China_AR_Xianbei_IA	-0.0111	-1.59	5214	5331	107301
Mbuti	Chechen	Guanzhuang	China_AR_Xianbei_IA	-0.0093	-1.558	7412	7552	150174
Mbuti	Dushan	Guanzhuang	China_AR_Xianbei_IA	-0.0161	-1.558	3292	3399	66614
Mbuti	Georgia_Kotias	Guanzhuang	China_AR_Xianbei_IA	-0.0109	-1.545	7550	7717	154072
Mbuti	Nepal_Mebrak_2125BP	Guanzhuang	China_AR_Xianbei_IA	-0.0123	-1.519	5167	5297	99286
Mbuti	Lebanon_MBA	Guanzhuang	China_AR_Xianbei_IA	-0.008	-1.504	7515	7636	152874
Mbuti	Jordan_PPNB_published	Guanzhuang	China_AR_Xianbei_IA	-0.0272	-1.496	846	893	18204
Mbuti	Kazakhstan_Turk	Guanzhuang	China_AR_Xianbei_IA	-0.0103	-1.493	6979	7124	139490
Mbuti	Balochi	Guanzhuang	China_AR_Xianbei_IA	-0.0073	-1.419	7401	7510	150509
Mbuti	Germany_EBA_Unetice	Guanzhuang	China_AR_Xianbei_IA	-0.0079	-1.413	6879	6989	139773
Mbuti	Mala	Guanzhuang	China_AR_Xianbei_IA	-0.0068	-1.408	7507	7610	150530
Mbuti	Greece_Minoan_Odigitria	Guanzhuang	China_AR_Xianbei_IA	-0.0192	-1.396	1543	1604	32035
Mbuti	Taiwan_Hanben_IA_lc	Guanzhuang	China_AR_Xianbei_IA	-0.0363	-1.373	461	496	9225
Mbuti	Turkmenistan_IA	Guanzhuang	China_AR_Xianbei_IA	-0.0098	-1.323	6305	6430	129388
Mbuti	Liangdao1	Guanzhuang	China_AR_Xianbei_IA	-0.0154	-1.304	2235	2305	45820
Mbuti	Mongolia_Bulgan_EarlyMedieval	Guanzhuang	China_AR_Xianbei_IA	-0.01	-1.296	5799	5916	112818
Mbuti	Sardinian	Guanzhuang	China_AR_Xianbei_IA	-0.0062	-1.276	7420	7513	150533
Mbuti	Greece_Minoan_Lassithi	Guanzhuang	China_AR_Xianbei_IA	-0.0076	-1.273	6508	6608	133581
Mbuti	Hungarian	Guanzhuang	China_AR_Xianbei_IA	-0.0068	-1.255	7466	7568	150524
Mbuti	China_Wuzhuangguoliang_LN	Guanzhuang	China_AR_Xianbei_IA	-0.0318	-1.231	329	351	6412
Mbuti	Samaritan	Guanzhuang	China_AR_Xianbei_IA	-0.0075	-1.211	7326	7436	149655
Mbuti	Cretan	Guanzhuang	China_AR_Xianbei_IA	-0.006	-1.185	7414	7503	150503
Mbuti	Yiyang	Guanzhuang	China_AR_Xianbei_IA	-0.0167	-1.16	1528	1580	31103
Mbuti	Greece_BA_Mycenaean	Guanzhuang	China_AR_Xianbei_IA	-0.0106	-1.142	2614	2670	58825
Mbuti	Bengali	Guanzhuang	China_AR_Xianbei_IA	-0.0057	-1.138	7514	7601	150517
Mbuti	Orcadian	Guanzhuang	China_AR_Xianbei_IA	-0.0059	-1.122	7448	7536	150522
Mbuti	Japan_Jomon	Guanzhuang	China_AR_Xianbei_IA	-0.0087	-1.122	6214	6323	122072
Mbuti	Pakistan_Loebanr_IA	Guanzhuang	China_AR_Xianbei_IA	-0.005	-1.121	7405	7479	148952
Mbuti	Makrani	Guanzhuang	China_AR_Xianbei_IA	-0.0057	-1.109	7372	7456	150521
Mbuti	Druze	Guanzhuang	China_AR_Xianbei_IA	-0.0057	-1.107	7356	7441	150515
Mbuti	Daur	Guanzhuang	China_AR_Xianbei_IA	-0.0068	-1.095	7826	7933	150147
Mbuti	Vietnam_N_published	Guanzhuang	China_AR_Xianbei_IA	-0.0255	-1.086	558	587	11089
Mbuti	Bulgaria_BeliBreyag_EBA	Guanzhuang	China_AR_Xianbei_IA	-0.0152	-1.071	1542	1590	32240
Mbuti	Russia_Ust_Ishim	Guanzhuang	China_AR_Xianbei_IA	-0.0068	-1.06	6992	7088	142260
Mbuti	Vietnam_N_all_published	Guanzhuang	China_AR_Xianbei_IA	-0.0221	-1.05	661	690	13330
Mbuti	Sindhi_Pakistan	Guanzhuang	China_AR_Xianbei_IA	-0.0052	-0.987	7444	7521	150520
Mbuti	Kurumba	Guanzhuang	China_AR_Xianbei_IA	-0.0058	-0.949	7478	7564	149603
Mbuti	Estonian	Guanzhuang	China_AR_Xianbei_IA	-0.0046	-0.9	7472	7542	150528
Mbuti	BedouinB	Guanzhuang	China_AR_Xianbei_IA	-0.0045	-0.878	7314	7380	150507
Mbuti	Iranian	Guanzhuang	China_AR_Xianbei_IA	-0.0043	-0.874	7411	7474	150531
Mbuti	Mongolia_Dornod_PreBronze	Guanzhuang	China_AR_Xianbei_IA	-0.0129	-0.822	1207	1238	23780
Mbuti	Russia_Abkhasian	Guanzhuang	China_AR_Xianbei_IA	-0.0041	-0.812	7455	7517	150523
Mbuti	Kalash	Guanzhuang	China_AR_Xianbei_IA	-0.0044	-0.809	7488	7554	150525
Mbuti	Lezgin	Guanzhuang	China_AR_Xianbei_IA	-0.004	-0.782	7442	7502	150527
Mbuti	Basque	Guanzhuang	China_AR_Xianbei_IA	-0.0039	-0.747	7445	7503	150527
Mbuti	Moldova_Cimmerian	Guanzhuang	China_AR_Xianbei_IA	-0.0056	-0.747	5172	5230	102971
Mbuti	Turkey_N	Guanzhuang	China_AR_Xianbei_IA	-0.0035	-0.744	7518	7571	151834
Mbuti	Iran_GanjDareh_N	Guanzhuang	China_AR_Xianbei_IA	-0.0041	-0.704	6815	6871	139588
Mbuti	Irula	Guanzhuang	China_AR_Xianbei_IA	-0.0036	-0.697	7502	7556	150523
Mbuti	Israel_C	Guanzhuang	China_AR_Xianbei_IA	-0.0036	-0.696	6841	6891	139958
Mbuti	French	Guanzhuang	China_AR_Xianbei_IA	-0.0033	-0.667	7497	7546	150534
Mbuti	Jordanian	Guanzhuang	China_AR_Xianbei_IA	-0.003	-0.654	7325	7370	150534
Mbuti	Mongolia_Arkhangai_XiongnuEarlyMedieval_3	Guanzhuang	China_AR_Xianbei_IA	-0.0031	-0.642	7775	7824	151126
Mbuti	Moldova_Glinoe_Scythian	Guanzhuang	China_AR_Xianbei_IA	-0.0036	-0.638	7318	7371	146698
Mbuti	Georgia_Satsurblia	Guanzhuang	China_AR_Xianbei_IA	-0.005	-0.637	5440	5495	111349
Mbuti	China_SEastAsia_Island_LN	Guanzhuang	China_AR_Xianbei_IA	-0.0192	-0.633	318	330	6815
Mbuti	Suogang	Guanzhuang	China_AR_Xianbei_IA	-0.0192	-0.633	318	330	6815
Mbuti	Tajik	Guanzhuang	China_AR_Xianbei_IA	-0.0033	-0.629	7460	7509	150530
Mbuti	Russia_Samara_EBA_Yamnaya_published	Guanzhuang	China_AR_Xianbei_IA	-0.0057	-0.629	3614	3655	74458
Mbuti	Jew_Yemenite	Guanzhuang	China_AR_Xianbei_IA	-0.0032	-0.625	7322	7369	150521
Mbuti	Turkmenistan_C_Namazga	Guanzhuang	China_AR_Xianbei_IA	-0.0048	-0.597	4245	4286	89096
Mbuti	USA_WA_Kennewick	Guanzhuang	China_AR_Xianbei_IA	-0.0051	-0.589	4749	4798	92354
Mbuti	Turkish	Guanzhuang	China_AR_Xianbei_IA	-0.0031	-0.586	7454	7500	150528
Mbuti	Polish	Guanzhuang	China_AR_Xianbei_IA	-0.0035	-0.583	7469	7522	150231
Mbuti	Kongo	Guanzhuang	China_AR_Xianbei_IA	-0.0032	-0.571	6059	6098	150108
Mbuti	Lemande	Guanzhuang	China_AR_Xianbei_IA	-0.0023	-0.518	6113	6141	150518
Mbuti	Armenia_EBA	Guanzhuang	China_AR_Xianbei_IA	-0.003	-0.515	6507	6546	132283
Mbuti	Spain_ElMiron	Guanzhuang	China_AR_Xianbei_IA	-0.0051	-0.515	3527	3563	73651
Mbuti	Bergamo	Guanzhuang	China_AR_Xianbei_IA	-0.0028	-0.468	7441	7483	150148
Mbuti	Mongolia_Sukhbaatar_MLBA	Guanzhuang	China_AR_Xianbei_IA	-0.0042	-0.462	3963	3996	76967
Mbuti	Pathan	Guanzhuang	China_AR_Xianbei_IA	-0.0024	-0.46	7502	7538	150528
Mbuti	Madiga	Guanzhuang	China_AR_Xianbei_IA	-0.0023	-0.449	7550	7584	150523
Mbuti	Hazara	Guanzhuang	China_AR_Xianbei_IA	-0.0023	-0.44	7669	7704	150515
Mbuti	Kazakhstan_Kimak	Guanzhuang	China_AR_Xianbei_IA	-0.0062	-0.437	1466	1484	29189
Mbuti	Philippines_RedSlippedPottery	Guanzhuang	China_AR_Xianbei_IA	-0.0202	-0.436	132	137	2705
Mbuti	Bulgarian	Guanzhuang	China_AR_Xianbei_IA	-0.0021	-0.415	7445	7476	150505
Mbuti	Mongolia_Selenge_XiongnuMedieval_o1	Guanzhuang	China_AR_Xianbei_IA	-0.0051	-0.41	1942	1962	38141
Mbuti	Russian	Guanzhuang	China_AR_Xianbei_IA	-0.0021	-0.397	7542	7574	150527
Mbuti	Ukraine_Scythian	Guanzhuang	China_AR_Xianbei_IA	-0.0025	-0.394	7263	7300	145346
Mbuti	Turkey_EBA_II	Guanzhuang	China_AR_Xianbei_IA	-0.0025	-0.393	6714	6747	137010
Mbuti	China_WLR_BA	Guanzhuang	China_AR_Xianbei_IA	-0.0034	-0.391	4213	4242	81232
Mbuti	Israel_Natufian_published	Guanzhuang	China_AR_Xianbei_IA	-0.0061	-0.364	1017	1029	21698
Mbuti	Vanuatu_2900BP	Guanzhuang	China_AR_Xianbei_IA	-0.0067	-0.358	853	865	16709
Mbuti	Armenian	Guanzhuang	China_AR_Xianbei_IA	-0.0018	-0.347	7474	7501	150526
Mbuti	Russia_Alan	Guanzhuang	China_AR_Xianbei_IA	-0.0019	-0.347	7615	7644	153163
Mbuti	Mongolia_Chalcolithic_Afanasievo_1	Guanzhuang	China_AR_Xianbei_IA	-0.003	-0.343	4762	4790	95813
Mbuti	USA_Anzick_realigned	Guanzhuang	China_AR_Xianbei_IA	-0.0022	-0.321	7940	7975	152655
Mbuti	Mongolia_Dundgobi_LatEMedieval	Guanzhuang	China_AR_Xianbei_IA	-0.002	-0.252	5416	5438	104890
Mbuti	Italy_Sicily_HG_OrienteC	Guanzhuang	China_AR_Xianbei_IA	-0.0068	-0.238	355	360	7167
Mbuti	Russia_Afanasievo	Guanzhuang	China_AR_Xianbei_IA	-0.0011	-0.237	7530	7547	150460
Mbuti	China_Xinjian_IA	Guanzhuang	China_AR_Xianbei_IA	-0.0015	-0.208	5570	5587	109151
Mbuti	Mongolia_Khentii_EIA_SlabGrave	Guanzhuang	China_AR_Xianbei_IA	-0.0037	-0.197	852	858	16674
Mbuti	Turkey_MLBA_AssyrianColonyPeriod	Guanzhuang	China_AR_Xianbei_IA	-0.0014	-0.194	4899	4913	99927
Mbuti	Kazakhstan_Nomad_IA	Guanzhuang	China_AR_Xianbei_IA	-0.001	-0.125	5347	5357	106355
Mbuti	Bulgaria_C	Guanzhuang	China_AR_Xianbei_IA	-0.0007	-0.124	6700	6709	135219
Mbuti	Icelandic	Guanzhuang	China_AR_Xianbei_IA	-0.0006	-0.12	7516	7525	150527
Mbuti	Bulgaria_IA	Guanzhuang	China_AR_Xianbei_IA	-0.0011	-0.115	3750	3758	75318
Mbuti	Russia_EBA_o1	Guanzhuang	China_AR_Xianbei_IA	-0.0015	-0.109	1425	1429	29590
Mbuti	Mongolia_Sukhbaatar_MLBAXiongnuLatEMedieval_sister	Guanzhuang	China_AR_Xianbei_IA	-0.0022	-0.082	431	433	8041
Mbuti	Russia_Samara_EBA_Yamnaya_published2	Guanzhuang	China_AR_Xianbei_IA	-0.0005	-0.067	7124	7131	143658
Mbuti	Russia_MLBA_Sintashta	Guanzhuang	China_AR_Xianbei_IA	-0.0002	-0.046	7551	7554	151340
Mbuti	Russia_MA1_HG	Guanzhuang	China_AR_Xianbei_IA	-0.0002	-0.03	5341	5343	106462
Mbuti	Kazakhstan_Kangju_o1	Guanzhuang	China_AR_Xianbei_IA	0	-0.002	4916	4916	99245
Mbuti	Yumin	Guanzhuang	China_AR_Xianbei_IA	0.0145	0.008742	1.654	5432	5277
Mbuti	Kashmiri_Pandit	Guanzhuang	China_AR_Xianbei_IA	0.0001	0.009	7445	7444	150172
Mbuti	Laos_BA	Guanzhuang	China_AR_Xianbei_IA	0.0001	0.011	2432	2432	47376
Mbuti	Longlin	Guanzhuang	China_AR_Xianbei_IA	0.0141	0.016531	0.853	1080	1050
Mbuti	China_AR_IA	Guanzhuang	China_AR_Xianbei_IA	0.001	0.035	375	374	7530
Mbuti	Germany_BellBeaker	Guanzhuang	China_AR_Xianbei_IA	0.0003	0.062	7543	7538	151148
Mbuti	Spain_C	Guanzhuang	China_AR_Xianbei_IA	0.0004	0.09	7492	7486	150240
Mbuti	Czech	Guanzhuang	China_AR_Xianbei_IA	0.0006	0.099	7494	7485	150235
Mbuti	Russia_Siberia_Lena_EBA_o	Guanzhuang	China_AR_Xianbei_IA	0.0027	0.105	463	461	8636
Mbuti	Tuscan_1	Guanzhuang	China_AR_Xianbei_IA	0.0006	0.105	7521	7513	150516
Mbuti	TAOSI	Guanzhuang	China_AR_Xianbei_IA	0.0022	0.135	1045	1041	21352
Mbuti	Adygei	Guanzhuang	China_AR_Xianbei_IA	0.0007	0.139	7492	7481	150520
Mbuti	Russia_AfontovaGora3	Guanzhuang	China_AR_Xianbei_IA	0.0021	0.146	1358	1353	29123
Mbuti	Russia_Tuva_IA_AldyBel	Guanzhuang	China_AR_Xianbei_IA	0.0014	0.176	5148	5134	101664
Mbuti	China_WLR_MN	Guanzhuang	China_AR_Xianbei_IA	0.0011	0.188	8086	8067	152885
Mbuti	China_Miaozigou_MN	Guanzhuang	China_AR_Xianbei_IA	0.0025	0.212	2344	2332	45058
Mbuti	Russia_IA_EarlySarmatian	Guanzhuang	China_AR_Xianbei_IA	0.0019	0.234	4720	4702	95266
Mbuti	Mongolia_Uvurkhangai_EIALatEMedieval	Guanzhuang	China_AR_Xianbei_IA	0.0016	0.252	6632	6610	128126
Mbuti	Mongolia_Arkhangai_XiongnuEarlyMedieval_1	Guanzhuang	China_AR_Xianbei_IA	0.002	0.255	5845	5821	118473
Mbuti	Hungary_IA_Scythian	Guanzhuang	China_AR_Xianbei_IA	0.0017	0.258	6649	6627	134551
Mbuti	Russia_NorthOssetian	Guanzhuang	China_AR_Xianbei_IA	0.0013	0.264	7512	7492	150527
Mbuti	Italy_North_Villabruna_HG	Guanzhuang	China_AR_Xianbei_IA	0.0022	0.279	5448	5424	110413
Mbuti	Kazakhstan_Kipchak1	Guanzhuang	China_AR_Xianbei_IA	0.0027	0.325	5245	5217	103686
Mbuti	Mixtec_1	Guanzhuang	China_AR_Xianbei_IA	0.0022	0.359	7734	7700	150058
Mbuti	Iran_C_SehGabi	Guanzhuang	China_AR_Xianbei_IA	0.0021	0.366	6659	6631	134742
Mbuti	Russia_Andronovo	Guanzhuang	China_AR_Xianbei_IA	0.0021	0.372	7629	7597	152574
Mbuti	Kazakhstan_Nomad_IA_o	Guanzhuang	China_AR_Xianbei_IA	0.0047	0.375	1949	1931	38483
Mbuti	Estonia_CordedWare	Guanzhuang	China_AR_Xianbei_IA	0.0023	0.378	6798	6767	136711
Mbuti	Germany_EN_LBK	Guanzhuang	China_AR_Xianbei_IA	0.0019	0.387	7508	7480	150668
Mbuti	Georgian	Guanzhuang	China_AR_Xianbei_IA	0.002	0.396	7468	7438	150527
Mbuti	Spain_MLN	Guanzhuang	China_AR_Xianbei_IA	0.0019	0.404	7438	7410	149179
Mbuti	Spain_HG	Guanzhuang	China_AR_Xianbei_IA	0.0032	0.414	6439	6398	127798
Mbuti	China_Tianyuan	Guanzhuang	China_AR_Xianbei_IA	0.0035	0.415	5507	5469	111157
Mbuti	Armenia_LBA	Guanzhuang	China_AR_Xianbei_IA	0.0042	0.421	3178	3152	64630
Mbuti	Kazakhstan_Wusun	Guanzhuang	China_AR_Xianbei_IA	0.003	0.438	7090	7048	139759
Mbuti	English	Guanzhuang	China_AR_Xianbei_IA	0.0023	0.438	7520	7486	150525
Mbuti	Spanish	Guanzhuang	China_AR_Xianbei_IA	0.0023	0.443	7471	7437	150516
Mbuti	Mongolia_Arkhangai_EarlyMedieval	Guanzhuang	China_AR_Xianbei_IA	0.0021	0.444	7611	7579	151164
Mbuti	Finnish	Guanzhuang	China_AR_Xianbei_IA	0.0023	0.473	7579	7544	150535
Mbuti	Sweden_Motala_HG	Guanzhuang	China_AR_Xianbei_IA	0.0028	0.474	6953	6914	138561
Mbuti	Albanian	Guanzhuang	China_AR_Xianbei_IA	0.0029	0.48	7492	7449	150337
Mbuti	Mongolia_Khovd_MLBAXiongnuLatEMedieval	Guanzhuang	China_AR_Xianbei_IA	0.0051	0.528	3487	3452	67151
Mbuti	China_AmurRiver_LPaleolithic	Guanzhuang	China_AR_Xianbei_IA	0.0035	0.528	5703	5663	109820
Mbuti	Russia_Srubnaya	Guanzhuang	China_AR_Xianbei_IA	0.0027	0.529	7579	7538	150656
Mbuti	Russia_BA_Okunevo	Guanzhuang	China_AR_Xianbei_IA	0.0026	0.529	7880	7840	154104
Mbuti	Russia_Kalmykia_EBA_Yamnaya	Guanzhuang	China_AR_Xianbei_IA	0.0031	0.549	7278	7234	145477
Mbuti	Russia_MBA_Poltavka	Guanzhuang	China_AR_Xianbei_IA	0.0038	0.558	5972	5927	119687
Mbuti	Russia_Tagar	Guanzhuang	China_AR_Xianbei_IA	0.0028	0.559	7746	7703	153542
Mbuti	Canada_MDorset	Guanzhuang	China_AR_Xianbei_IA	0.0143	0.566	458	445	9065
Mbuti	Kazakhstan_Karluk_1	Guanzhuang	China_AR_Xianbei_IA	0.0041	0.579	7371	7311	143593
Mbuti	Russia_Siberia_Tenisei_EBA	Guanzhuang	China_AR_Xianbei_IA	0.0051	0.599	5053	5002	98579
Mbuti	Russia_HG_Karelia	Guanzhuang	China_AR_Xianbei_IA	0.0045	0.605	6791	6730	135022
Mbuti	Kazakhstan_Central_Saka	Guanzhuang	China_AR_Xianbei_IA	0.0036	0.635	7585	7530	148198
Mbuti	Mongolia_Khuvsgul_XiongnuLatEMedieval_1	Guanzhuang	China_AR_Xianbei_IA	0.0037	0.647	7083	7031	139437
Mbuti	Russia_Samara_EBA_Yamnaya	Guanzhuang	China_AR_Xianbei_IA	0.0038	0.684	7346	7291	146669
Mbuti	Mongolia_Xiongnu_o2	Guanzhuang	China_AR_Xianbei_IA	0.0047	0.688	7253	7185	141957
Mbuti	Karitiana	Guanzhuang	China_AR_Xianbei_IA	0.0039	0.688	7836	7776	150533
Mbuti	Germany_CordedWare	Guanzhuang	China_AR_Xianbei_IA	0.0037	0.701	7461	7405	148983
Mbuti	Mongolia_Arkhangai_MLBAtoEIAorMedieval_o	Guanzhuang	China_AR_Xianbei_IA	0.0113	0.722	1347	1316	25623
Mbuti	Kazakhstan_TianShan_Saka	Guanzhuang	China_AR_Xianbei_IA	0.0172	0.746	502	485	10015
Mbuti	Russia_Mezhovskaya	Guanzhuang	China_AR_Xianbei_IA	0.0052	0.748	6907	6835	137254
Mbuti	Spain_EN	Guanzhuang	China_AR_Xianbei_IA	0.0044	0.794	6943	6882	140269
Mbuti	Russia_Karasuk_oRISE	Guanzhuang	China_AR_Xianbei_IA	0.0039	0.802	7837	7776	153769
Mbuti	Mongolia_EBA_Chemurchek_2	Guanzhuang	China_AR_Xianbei_IA	0.0057	0.846	5851	5784	116326
Mbuti	Nahua	Guanzhuang	China_AR_Xianbei_IA	0.0053	0.88	7835	7752	150360
Mbuti	Russia_SaltovoMayaki	Guanzhuang	China_AR_Xianbei_IA	0.0203	0.882	596	572	12068
Mbuti	Armenia_C	Guanzhuang	China_AR_Xianbei_IA	0.0054	0.917	6748	6676	135863
Mbuti	Mexico_Zapotec	Guanzhuang	China_AR_Xianbei_IA	0.0052	0.929	7815	7734	150523
Mbuti	Altaian	Guanzhuang	China_AR_Xianbei_IA	0.0061	0.977	7825	7730	150276
Mbuti	Kazakhstan_Kumsay_EBA	Guanzhuang	China_AR_Xianbei_IA	0.0063	1.009	6232	6154	123237
Mbuti	Piapoco	Guanzhuang	China_AR_Xianbei_IA	0.0056	1.052	7860	7772	150516
Mbuti	Kyrgyzstan_TianShan_Hun	Guanzhuang	China_AR_Xianbei_IA	0.0048	1.078	7867	7792	154128
Mbuti	Mongolia_Ulaanbaatar_EIALatEMedieval	Guanzhuang	China_AR_Xianbei_IA	0.0109	1.13	3324	3253	63276
Mbuti	Canada_MDorset_published	Guanzhuang	China_AR_Xianbei_IA	0.0243	1.15	739	703	13591
Mbuti	Russia_IA_2	Guanzhuang	China_AR_Xianbei_IA	0.0092	1.151	5659	5556	109708
Mbuti	Kazakhstan_ZevakinoChilikta_IA_2	Guanzhuang	China_AR_Xianbei_IA	0.0143	1.177	2056	1998	40104
Mbuti	Aleut	Guanzhuang	China_AR_Xianbei_IA	0.0061	1.191	7754	7660	150530
Mbuti	Russia_DevilsCave_N	Guanzhuang	China_AR_Xianbei_IA	0.0069	1.195	8185	8072	154097
Mbuti	Quechua	Guanzhuang	China_AR_Xianbei_IA	0.0069	1.258	7839	7731	150528
Mbuti	Kazakhstan_Karakhanid	Guanzhuang	China_AR_Xianbei_IA	0.0114	1.277	4368	4270	85521
Mbuti	Russia_Kurma_EBA	Guanzhuang	China_AR_Xianbei_IA	0.0106	1.281	4915	4812	93538
Mbuti	Kazakhstan_IA_Saka_dup	Guanzhuang	China_AR_Xianbei_IA	0.021	1.284	1038	996	20362
Mbuti	Kazakhstan_Wusun_LateSaka_dup	Guanzhuang	China_AR_Xianbei_IA	0.0179	1.31	1665	1606	31971
Mbuti	Mongolia_Khovd_MLBAEarlyMedieval	Guanzhuang	China_AR_Xianbei_IA	0.0081	1.314	6934	6823	135947
Mbuti	Russia_LBA_1	Guanzhuang	China_AR_Xianbei_IA	0.0337	1.317	465	435	8807
Mbuti	Mixe	Guanzhuang	China_AR_Xianbei_IA	0.0072	1.348	7868	7756	150532
Mbuti	Russia_AginBuryat_N	Guanzhuang	China_AR_Xianbei_IA	0.0147	1.372	2780	2700	52227
Mbuti	Kyrgyzstan_Medieval_Nomad_o	Guanzhuang	China_AR_Xianbei_IA	0.0139	1.373	3346	3254	64476
Mbuti	Russia_Siberia_UP	Guanzhuang	China_AR_Xianbei_IA	0.013	1.382	3978	3876	75674
Mbuti	China_AmurRiver_BA	Guanzhuang	China_AR_Xianbei_IA	0.0816	1.535	124	105	2281
Mbuti	Mongolia_Sukhbaatar_LatEMedieval	Guanzhuang	China_AR_Xianbei_IA	0.007	1.535	8065	7954	152592
Mbuti	Kazakhstan_Nomad_HP	Guanzhuang	China_AR_Xianbei_IA	0.0091	1.574	7860	7718	148773
Mbuti	Russia_UstIda_LN	Guanzhuang	China_AR_Xianbei_IA	0.0101	1.619	7426	7279	142274
Mbuti	Russia_Lokomotiv_Eneolithic	Guanzhuang	China_AR_Xianbei_IA	0.0103	1.643	7237	7089	136707
Mbuti	USA_Ancient_Beringian	Guanzhuang	China_AR_Xianbei_IA	0.0108	1.649	8091	7918	154129
Mbuti	China_NEastAsia_Inland_EN	Guanzhuang	China_AR_Xianbei_IA	0.0145	1.654	5432	5277	103865
Mbuti	Russia_CentralYakutia_IA	Guanzhuang	China_AR_Xianbei_IA	0.0384	1.655	556	515	10151
Mbuti	Mongolia_LBA_Ulaanzukh_2_dup	Guanzhuang	China_AR_Xianbei_IA	0.0136	1.666	5699	5546	108224
Mbuti	Pima	Guanzhuang	China_AR_Xianbei_IA	0.0095	1.67	7892	7743	150514
Mbuti	Chipewyan	Guanzhuang	China_AR_Xianbei_IA	0.0096	1.731	7893	7742	150527
Mbuti	Mayan	Guanzhuang	China_AR_Xianbei_IA	0.0093	1.743	7882	7736	150509
Mbuti	Mongolia_EIA_8	Guanzhuang	China_AR_Xianbei_IA	0.0145	1.768	5138	4991	97186
Mbuti	Surui	Guanzhuang	China_AR_Xianbei_IA	0.0107	1.807	7870	7704	150513
Mbuti	Kazakhstan_Central_Steppe_EMBA	Guanzhuang	China_AR_Xianbei_IA	0.0104	1.818	7983	7818	154096
Mbuti	Kazakhstan_Botai_Eneolithic	Guanzhuang	China_AR_Xianbei_IA	0.0128	1.82	6062	5909	118361
Mbuti	Chane	Guanzhuang	China_AR_Xianbei_IA	0.0112	1.839	7906	7732	150305
Mbuti	Mongolia_Tuv_Xiongnu	Guanzhuang	China_AR_Xianbei_IA	0.0129	1.843	7008	6829	131952
Mbuti	Mongolia_Uvurkhangai_Xiongnu	Guanzhuang	China_AR_Xianbei_IA	0.0116	1.854	7027	6866	132774
Mbuti	Mongolia_Tuv_LatEMedieval	Guanzhuang	China_AR_Xianbei_IA	0.0109	1.872	6825	6678	129037
Mbuti	Cree1	Guanzhuang	China_AR_Xianbei_IA	0.0113	1.873	7803	7629	150227
Mbuti	Mongolia_Uvs_EIAXiongnuLateMedival	Guanzhuang	China_AR_Xianbei_IA	0.0096	1.888	7637	7492	148704
Mbuti	Russia_Buryatia_PreBronze	Guanzhuang	China_AR_Xianbei_IA	0.0148	1.898	5750	5583	108110
Mbuti	Mongolia_Arkhangai_XiongnuEarlyMedieval_2	Guanzhuang	China_AR_Xianbei_IA	0.0131	1.93	5605	5461	110999
Mbuti	Chukchi	Guanzhuang	China_AR_Xianbei_IA	0.0108	1.936	7761	7595	150371
Mbuti	Mongolia_Arkhangai_PreBronze	Guanzhuang	China_AR_Xianbei_IA	0.0164	1.995	5256	5087	99263
Mbuti	Russia_Chita_BA	Guanzhuang	China_AR_Xianbei_IA	0.0327	2.01	1234	1156	22516
Mbuti	Canada_LateDorset	Guanzhuang	China_AR_Xianbei_IA	0.0267	2.033	2015	1910	38279
Mbuti	China_AR_EN	Guanzhuang	China_AR_Xianbei_IA	0.0242	2.126	2558	2437	48170
Mbuti	Kazakhstan_IA_Berel_Pazyryk	Guanzhuang	China_AR_Xianbei_IA	0.0132	2.141	7218	7031	138872
Mbuti	Tubalar	Guanzhuang	China_AR_Xianbei_IA	0.0109	2.165	7833	7664	150532
Mbuti	Russia_Blagovechensk_IA	Guanzhuang	China_AR_Xianbei_IA	0.0216	2.167	3401	3257	62850
Mbuti	Mansi	Guanzhuang	China_AR_Xianbei_IA	0.011	2.213	7784	7614	150529
Mbuti	Mongolia_Tuv_EIA	Guanzhuang	China_AR_Xianbei_IA	0.0215	2.218	3950	3784	73130
Mbuti	China_AmurRiver_EarlyN	Guanzhuang	China_AR_Xianbei_IA	0.018	2.248	4837	4666	92101
Mbuti	Mongolia_LBA_Ulaanzukh_2	Guanzhuang	China_AR_Xianbei_IA	0.0151	2.257	6120	5938	115812
Mbuti	Eskimo_Sireniki	Guanzhuang	China_AR_Xianbei_IA	0.0126	2.33	7945	7748	150528
Mbuti	Russia_KuengaRiver_N_1	Guanzhuang	China_AR_Xianbei_IA	0.0537	2.342	589	529	10403
Mbuti	Mongolia_LBA_CenterWest_4_o	Guanzhuang	China_AR_Xianbei_IA	0.0193	2.346	5283	5083	99765
Mbuti	Mongolia_Bulgan_Xiongnu	Guanzhuang	China_AR_Xianbei_IA	0.0148	2.377	6837	6637	128899
Mbuti	Hezhen	Guanzhuang	China_AR_Xianbei_IA	0.0127	2.4	8000	7799	150528
Mbuti	China_HMMH_MN	Guanzhuang	China_AR_Xianbei_IA	0.0205	2.433	5164	4957	96612
Mbuti	Kazakhstan_Nomad_Hun_Sarmatian	Guanzhuang	China_AR_Xianbei_IA	0.0171	2.541	6954	6721	131768
Mbuti	China_AmurRiver_Mesolithic	Guanzhuang	China_AR_Xianbei_IA	0.0205	2.563	4446	4268	83785
Mbuti	Russia_KolymaRiver_LN_1d	Guanzhuang	China_AR_Xianbei_IA	0.0273	2.714	3102	2937	56726
Mbuti	Kazakhstan_Korgantas_IA	Guanzhuang	China_AR_Xianbei_IA	0.0218	2.773	6225	5959	116952
Mbuti	Mongolia_Khuvsgul_XiongnuLatEMedieval_2	Guanzhuang	China_AR_Xianbei_IA	0.0153	2.911	7618	7387	143957
Mbuti	Russia_Buryatia_Xiongnu_mother	Guanzhuang	China_AR_Xianbei_IA	0.0257	2.942	4957	4708	92703
Mbuti	Kazakhstan_Berel_IA_o3	Guanzhuang	China_AR_Xianbei_IA	0.0169	3.017	7830	7570	147440
Mbuti	Mongolia_Sukhbaatar_MLBAXiongnuLatEMedieval	Guanzhuang	China_AR_Xianbei_IA	0.0148	3.055	7995	7763	150323
Mbuti	Mongolia_IA_Xianbei	Guanzhuang	China_AR_Xianbei_IA	0.0251	3.078	5292	5033	99793
Mbuti	Russia_UstIda_EBA	Guanzhuang	China_AR_Xianbei_IA	0.0212	3.106	6136	5881	116466
Mbuti	Buryat	Guanzhuang	China_AR_Xianbei_IA	0.016	3.189	8204	7946	154139
Mbuti	Mongolia_EIA_Xiongnu_7	Guanzhuang	China_AR_Xianbei_IA	0.0256	3.219	5151	4893	96173
Mbuti	Mongolia_Bulgan_LatEMedieval	Guanzhuang	China_AR_Xianbei_IA	0.0255	3.227	5585	5307	104121
Mbuti	Russia_Shamanka_EBA	Guanzhuang	China_AR_Xianbei_IA	0.0199	3.275	7515	7221	141497
Mbuti	Yakut	Guanzhuang	China_AR_Xianbei_IA	0.0168	3.278	8009	7745	150515
Mbuti	Mongolia_EBA_Ulgii_1_dup	Guanzhuang	China_AR_Xianbei_IA	0.0255	3.427	6745	6409	126924
Mbuti	Mongolia_Khentii_Xiongnu_daughter	Guanzhuang	China_AR_Xianbei_IA	0.032	3.472	4243	3980	79233
Mbuti	Koryak	Guanzhuang	China_AR_Xianbei_IA	0.0207	3.556	8270	7934	154133
Mbuti	Mongolia_East_N	Guanzhuang	China_AR_Xianbei_IA	0.0244	3.613	6841	6515	127652
Mbuti	China_AmurRiver_N	Guanzhuang	China_AR_Xianbei_IA	0.0245	3.626	5642	5372	106138
Mbuti	Russia_MN_Boisman	Guanzhuang	China_AR_Xianbei_IA	0.0215	3.64	7035	6739	131463
Mbuti	Russia_IA_Yankovsky	Guanzhuang	China_AR_Xianbei_IA	0.0328	3.699	4302	4029	79989
Mbuti	Mongolia_Chalcolithic_Afanasievo_2	Guanzhuang	China_AR_Xianbei_IA	0.033	3.755	4721	4419	88540
Mbuti	Russia_UstBelaya_Angara	Guanzhuang	China_AR_Xianbei_IA	0.0189	3.758	7702	7417	145546
Mbuti	Russia_ArgunRiver_M	Guanzhuang	China_AR_Xianbei_IA	0.0267	3.817	8169	7745	151403
Mbuti	Russia_CentralYakutia_LN	Guanzhuang	China_AR_Xianbei_IA	0.0257	3.825	8070	7666	149649
Mbuti	Eskimo_Naukan	Guanzhuang	China_AR_Xianbei_IA	0.0218	3.908	8024	7681	150528
Mbuti	Mongolia_Umungobi_LatEMedieval	Guanzhuang	China_AR_Xianbei_IA	0.0211	3.915	7528	7217	141387
Mbuti	Russia_Buryatia_Xiongnu	Guanzhuang	China_AR_Xianbei_IA	0.0214	3.945	7588	7269	142222
Mbuti	Kazakhstan_GoldenHordeAsian	Guanzhuang	China_AR_Xianbei_IA	0.0281	3.95	7824	7396	145839
Mbuti	Eskimo_Chaplin	Guanzhuang	China_AR_Xianbei_IA	0.0245	3.999	8058	7673	150385
Mbuti	Russia_AngaraRiver_EN	Guanzhuang	China_AR_Xianbei_IA	0.0295	4.093	7871	7420	145749
Mbuti	Russia_Krasnoyarsk_BA	Guanzhuang	China_AR_Xianbei_IA	0.0293	4.187	8334	7859	154071
Mbuti	Mongolia_Dornod_Xiongnu	Guanzhuang	China_AR_Xianbei_IA	0.0325	4.25	6613	6197	122257
Mbuti	Russia_LenaRiver_EN	Guanzhuang	China_AR_Xianbei_IA	0.0322	4.25	7041	6601	129558
Mbuti	Russia_KuengaRiver_N_2	Guanzhuang	China_AR_Xianbei_IA	0.032	4.288	7553	7084	137843
Mbuti	Russia_Shamanka_Eneolithic	Guanzhuang	China_AR_Xianbei_IA	0.0198	4.311	8267	7946	154133
Mbuti	Mongolia_Khentii_LatEMedieval	Guanzhuang	China_AR_Xianbei_IA	0.027	4.331	6852	6491	128035
Mbuti	Oroqen	Guanzhuang	China_AR_Xianbei_IA	0.0237	4.37	8124	7747	150523
Mbuti	Russia_Siberia_Irkutsk_EBA	Guanzhuang	China_AR_Xianbei_IA	0.0298	4.441	6783	6390	125981
Mbuti	Greenland_Saqqaq	Guanzhuang	China_AR_Xianbei_IA	0.034	4.695	7610	7110	141476
Mbuti	China_WLR_BA_o	Guanzhuang	China_AR_Xianbei_IA	0.0406	4.838	5802	5349	105623
Mbuti	Ulchi	Guanzhuang	China_AR_Xianbei_IA	0.0244	4.902	8096	7711	150522
Mbuti	Russia_KadalinkaRiver_N	Guanzhuang	China_AR_Xianbei_IA	0.0363	4.908	7850	7300	143972
Mbuti	Mongolia_North_N	Guanzhuang	China_AR_Xianbei_IA	0.0262	4.91	7516	7132	139820
Mbuti	Mongolia_Khentii_Xiongnu	Guanzhuang	China_AR_Xianbei_IA	0.039	4.914	6426	5944	117490
Mbuti	Mongolia_Dornod_LatEMedieval	Guanzhuang	China_AR_Xianbei_IA	0.0259	4.964	7935	7534	147562
Mbuti	Russia_KolymaRiver_LN	Guanzhuang	China_AR_Xianbei_IA	0.0275	4.987	8335	7889	154120
Mbuti	Even	Guanzhuang	China_AR_Xianbei_IA	0.0271	5.061	8121	7692	150531
Mbuti	Mongolia_EIA_SlabGrave_1	Guanzhuang	China_AR_Xianbei_IA	0.0261	5.43	7968	7562	147775
Mbuti	Mongolia_Bulgan_EarlyMedievalLatEMedieval	Guanzhuang	China_AR_Xianbei_IA	0.028	5.491	7906	7476	147531
Mbuti	Mongolia_Arkhangai_Xiongnu_o	Guanzhuang	China_AR_Xianbei_IA	0.0423	5.723	6808	6256	124364

## Sheet: C
Table S2C. f4(Mbuti, Reference; X, Guanzhuang) to evaluate the genetic divergence between the Guanzhuang population and population X. The 'Reference' group consists of 287 ancient and contemporary populations, while population X includes ancient populations from various regions of East Asia. |Z|>3 indicates the significant values, highlighted in Datas by blue (positive) and red (negative) ; 2<|Z|…
f4(Mbuti, Reference; Guanzhuang, China_HMMH_MN )
pop1	pop2	pop3	pop4	f4	Z	ABAB	ABBA	SNPs
Mbuti	KHV	Guanzhuang	China_HMMH_MN	-0.0276	-8.394	20475	21638	402682
Mbuti	CHS	Guanzhuang	China_HMMH_MN	-0.0275	-8.331	20566	21730	402682
Mbuti	CDX	Guanzhuang	China_HMMH_MN	-0.0264	-7.943	20499	21610	402682
Mbuti	CHB	Guanzhuang	China_HMMH_MN	-0.0241	-7.287	20647	21668	402682
Mbuti	Dai	Guanzhuang	China_HMMH_MN	-0.0262	-6.908	20503	21608	402680
Mbuti	Taiwan_Hanben_IA	Guanzhuang	China_HMMH_MN	-0.0248	-6.714	20287	21317	397585
Mbuti	Atayal	Guanzhuang	China_HMMH_MN	-0.0341	-6.634	19644	21032	390463
Mbuti	Han	Guanzhuang	China_HMMH_MN	-0.025	-6.448	19996	21021	391179
Mbuti	Miao	Guanzhuang	China_HMMH_MN	-0.0274	-6.263	19917	21040	391164
Mbuti	Kinh	Guanzhuang	China_HMMH_MN	-0.0261	-6.205	19850	20913	391123
Mbuti	China_Lahu	Guanzhuang	China_HMMH_MN	-0.0266	-6.079	19847	20930	391152
Mbuti	Dusun	Guanzhuang	China_HMMH_MN	-0.0253	-5.897	19788	20817	391123
Mbuti	China_YR_LBIA	Guanzhuang	China_HMMH_MN	-0.022	-5.783	20443	21364	398565
Mbuti	BaBanQinCen	Guanzhuang	China_HMMH_MN	-0.032	-5.754	10983	11708	222016
Mbuti	Burmese	Guanzhuang	China_HMMH_MN	-0.023	-5.657	19811	20745	391156
Mbuti	China_SEastAsia_Coastal_Historic	Guanzhuang	China_HMMH_MN	-0.0507	-5.657	4043	4475	84754
Mbuti	China_YR_LN	Guanzhuang	China_HMMH_MN	-0.02	-5.526	20683	21528	401718
Mbuti	RIA	Guanzhuang	China_HMMH_MN	-0.0185	-5.423	20433	21205	400631
Mbuti	JPT	Guanzhuang	China_HMMH_MN	-0.0177	-5.326	20811	21560	402682
Mbuti	Hawaiian	Guanzhuang	China_HMMH_MN	-0.0252	-5.323	19690	20707	389947
Mbuti	Thai	Guanzhuang	China_HMMH_MN	-0.0216	-5.295	19810	20685	391153
Mbuti	Ami	Guanzhuang	China_HMMH_MN	-0.0236	-5.285	19982	20950	391147
Mbuti	Mongolia_Selenge_Xiongnu	Guanzhuang	China_HMMH_MN	-0.0305	-5.259	14793	15724	294047
Mbuti	LG	Guanzhuang	China_HMMH_MN	-0.0243	-5.21	18211	19116	357151
Mbuti	Taiwan_Liangdao_LatePaleolithic	Guanzhuang	China_HMMH_MN	-0.0515	-4.846	2808	3113	54238
Mbuti	Maori	Guanzhuang	China_HMMH_MN	-0.0211	-4.685	19241	20071	390106
Mbuti	Malaysia_historical	Guanzhuang	China_HMMH_MN	-0.0444	-4.666	3253	3556	65915
Mbuti	GaoHuaHua	Guanzhuang	China_HMMH_MN	-0.0224	-4.61	16424	17175	323579
Mbuti	China_SEastAsia_Coastal_LN	Guanzhuang	China_HMMH_MN	-0.0275	-4.599	9627	10172	195577
Mbuti	Cambodian	Guanzhuang	China_HMMH_MN	-0.0195	-4.503	19842	20633	391158
Mbuti	China_Shimao_LN	Guanzhuang	China_HMMH_MN	-0.0205	-4.445	20472	21327	397069
Mbuti	Xitoucun	Guanzhuang	China_HMMH_MN	-0.0291	-4.431	7895	8369	162036
Mbuti	Shenxian	Guanzhuang	China_HMMH_MN	-0.0278	-4.342	9434	9975	190556
Mbuti	Korean	Guanzhuang	China_HMMH_MN	-0.0182	-4.273	20113	20859	391156
Mbuti	Vietnam_BA	Guanzhuang	China_HMMH_MN	-0.0352	-4.193	4835	5187	98181
Mbuti	Tanshishan	Guanzhuang	China_HMMH_MN	-0.0331	-4.135	5266	5627	108361
Mbuti	Taiwan_Gongguan	Guanzhuang	China_HMMH_MN	-0.027	-4.08	9954	10507	200301
Mbuti	JXNT	Guanzhuang	China_HMMH_MN	-0.0195	-4.001	18661	19405	363365
Mbuti	Naxi	Guanzhuang	China_HMMH_MN	-0.0154	-3.96	20160	20792	391175
Mbuti	Vietnam_BA_all	Guanzhuang	China_HMMH_MN	-0.0278	-3.896	7215	7627	144714
Mbuti	LaCen	Guanzhuang	China_HMMH_MN	-0.0206	-3.532	12511	13039	250355
Mbuti	China_Upper_YR_IA	Guanzhuang	China_HMMH_MN	-0.015	-3.422	19757	20357	381821
Mbuti	China_YR_MN	Guanzhuang	China_HMMH_MN	-0.0142	-3.332	20695	21291	399698
Mbuti	Mongolia_Xiongnu_o1	Guanzhuang	China_HMMH_MN	-0.0137	-3.284	20684	21257	402397
Mbuti	Vietnam_LN	Guanzhuang	China_HMMH_MN	-0.023	-3.261	6708	7024	136032
Mbuti	Laos_BA	Guanzhuang	China_HMMH_MN	-0.0257	-3.242	6371	6706	127412
Mbuti	Tonga_2500BP	Guanzhuang	China_HMMH_MN	-0.0322	-3.211	3495	3728	70937
Mbuti	Laos_LN_BA	Guanzhuang	China_HMMH_MN	-0.0185	-3.157	15222	15796	301431
Mbuti	Vietnam_N	Guanzhuang	China_HMMH_MN	-0.0289	-3.096	3382	3583	69800
Mbuti	Thailand_IA	Guanzhuang	China_HMMH_MN	-0.0176	-3.069	10874	11263	217884
Mbuti	China_SEastAsia_Island_EN	Guanzhuang	China_HMMH_MN	-0.0154	-2.857	14465	14917	288741
Mbuti	Tibetan	Guanzhuang	China_HMMH_MN	-0.0117	-2.85	20074	20548	391155
Mbuti	Yi	Guanzhuang	China_HMMH_MN	-0.0119	-2.794	20234	20722	391157
Mbuti	Baojianshan	Guanzhuang	China_HMMH_MN	-0.017	-2.792	12070	12487	243707
Mbuti	Kusunda	Guanzhuang	China_HMMH_MN	-0.0118	-2.741	19776	20248	391118
Mbuti	China_Upper_YR_LN	Guanzhuang	China_HMMH_MN	-0.0109	-2.708	20750	21206	398755
Mbuti	Guam_LateUnai_Ritidian	Guanzhuang	China_HMMH_MN	-0.0352	-2.648	1735	1861	37166
Mbuti	China_SEastAsia_Coastal_EN	Guanzhuang	China_HMMH_MN	-0.0247	-2.606	4096	4303	86001
Mbuti	Liangdao2	Guanzhuang	China_HMMH_MN	-0.0151	-2.602	14074	14504	280495
Mbuti	China_WLR_LN	Guanzhuang	China_HMMH_MN	-0.0134	-2.587	16410	16856	319317
Mbuti	Nepal_Chokhopani_2800BP	Guanzhuang	China_HMMH_MN	-0.0138	-2.557	20711	21290	402198
Mbuti	Japanese	Guanzhuang	China_HMMH_MN	-0.0101	-2.521	20270	20683	391175
Mbuti	Dungan	Guanzhuang	China_HMMH_MN	-0.0111	-2.51	20768	21232	402567
Mbuti	Vietnam_historical	Guanzhuang	China_HMMH_MN	-0.0219	-2.486	4565	4770	90294
Mbuti	Sherpa	Guanzhuang	China_HMMH_MN	-0.0105	-2.386	20182	20609	391150
Mbuti	Dushan	Guanzhuang	China_HMMH_MN	-0.0167	-2.304	8087	8361	164448
Mbuti	Uyghur	Guanzhuang	China_HMMH_MN	-0.0087	-2.133	19736	20083	391156
Mbuti	Germany_EBA_Unetice	Guanzhuang	China_HMMH_MN	-0.0091	-2.086	17428	17748	355887
Mbuti	Indonesia_LN_BA_IA	Guanzhuang	China_HMMH_MN	-0.0267	-2.078	1784	1882	36414
Mbuti	Russia_EBA_o1	Guanzhuang	China_HMMH_MN	-0.0185	-2.07	3829	3974	78810
Mbuti	ONG	Guanzhuang	China_HMMH_MN	-0.0086	-2.032	20099	20448	400597
Mbuti	Vietnam_BA_DongSonCulture	Guanzhuang	China_HMMH_MN	-0.0133	-2.011	7116	7308	147960
Mbuti	Nepal_Samdzong_1500BP	Guanzhuang	China_HMMH_MN	-0.0078	-1.971	20842	21170	402415
Mbuti	China_SEastAsia_Island_LN	Guanzhuang	China_HMMH_MN	-0.0372	-1.846	787	848	16522
Mbuti	Suogang	Guanzhuang	China_HMMH_MN	-0.0372	-1.846	787	848	16522
Mbuti	Qihe3	Guanzhuang	China_HMMH_MN	-0.012	-1.83	10056	10300	201781
Mbuti	Greece_BA_Mycenaean	Guanzhuang	China_HMMH_MN	-0.0115	-1.829	6582	6736	147980
Mbuti	China_Tianyuan	Guanzhuang	China_HMMH_MN	-0.0103	-1.705	13481	13760	274368
Mbuti	Slovakia_Poprad	Guanzhuang	China_HMMH_MN	-0.0114	-1.669	8308	8500	170548
Mbuti	China_Wuzhuangguoliang_LN	Guanzhuang	China_HMMH_MN	-0.0262	-1.653	782	824	16317
Mbuti	Sindhi_Pakistan	Guanzhuang	China_HMMH_MN	-0.0065	-1.634	19361	19616	391142
Mbuti	French	Guanzhuang	China_HMMH_MN	-0.0061	-1.626	19314	19549	391181
Mbuti	Iranian	Guanzhuang	China_HMMH_MN	-0.0064	-1.625	19142	19388	391169
Mbuti	Taiwan_Hanben_IA_lc	Guanzhuang	China_HMMH_MN	-0.0266	-1.623	1133	1195	22807
Mbuti	Yiyang	Guanzhuang	China_HMMH_MN	-0.0158	-1.596	3721	3840	74859
Mbuti	Burusho	Guanzhuang	China_HMMH_MN	-0.0062	-1.595	19433	19676	391129
Mbuti	Turkmenistan_IA	Guanzhuang	China_HMMH_MN	-0.0082	-1.539	16628	16904	340444
Mbuti	Shandong_EN	Guanzhuang	China_HMMH_MN	-0.0074	-1.517	15907	16142	310028
Mbuti	Orcadian	Guanzhuang	China_HMMH_MN	-0.0063	-1.506	19314	19557	391147
Mbuti	Hungarian	Guanzhuang	China_HMMH_MN	-0.0061	-1.503	19296	19533	391142
Mbuti	Longlin	Guanzhuang	China_HMMH_MN	-0.0179	-1.494	2426	2514	50796
Mbuti	Guanzhuang_o1	Guanzhuang	China_HMMH_MN	-0.0367	-1.489	447	481	8710
Mbuti	Mongolia_Bulgan_EarlyMedieval	Guanzhuang	China_HMMH_MN	-0.0089	-1.487	14293	14551	281441
Mbuti	Russia_Tagar	Guanzhuang	China_HMMH_MN	-0.0055	-1.449	20041	20262	401072
Mbuti	Mongola	Guanzhuang	China_HMMH_MN	-0.006	-1.431	20257	20503	391163
Mbuti	Khonda_Dora	Guanzhuang	China_HMMH_MN	-0.0069	-1.425	19612	19884	390673
Mbuti	Tajik	Guanzhuang	China_HMMH_MN	-0.0058	-1.408	19324	19550	391161
Mbuti	Greece_Minoan_Odigitria	Guanzhuang	China_HMMH_MN	-0.0124	-1.385	3754	3848	78526
Mbuti	Georgian	Guanzhuang	China_HMMH_MN	-0.0055	-1.37	19188	19400	391165
Mbuti	Adygei	Guanzhuang	China_HMMH_MN	-0.0054	-1.321	19298	19509	391138
Mbuti	Russia_Ust_Ishim	Guanzhuang	China_HMMH_MN	-0.0067	-1.316	17992	18235	367542
Mbuti	Basque	Guanzhuang	China_HMMH_MN	-0.0054	-1.311	19289	19497	391156
Mbuti	Spanish	Guanzhuang	China_HMMH_MN	-0.0051	-1.295	19225	19422	391122
Mbuti	Liangdao1	Guanzhuang	China_HMMH_MN	-0.011	-1.295	5451	5572	113601
Mbuti	Chechen	Guanzhuang	China_HMMH_MN	-0.0055	-1.269	19241	19453	390250
Mbuti	Jordanian	Guanzhuang	China_HMMH_MN	-0.0045	-1.244	18991	19163	391182
Mbuti	China_NEastAsia_Coastal_EN	Guanzhuang	China_HMMH_MN	-0.0053	-1.22	18019	18210	348425
Mbuti	Turkish	Guanzhuang	China_HMMH_MN	-0.0047	-1.191	19287	19471	391162
Mbuti	Cretan	Guanzhuang	China_HMMH_MN	-0.0048	-1.191	19204	19389	391135
Mbuti	Vietnam_N_published	Guanzhuang	China_HMMH_MN	-0.0179	-1.191	1393	1443	28516
Mbuti	Sardinian	Guanzhuang	China_HMMH_MN	-0.0044	-1.18	19265	19437	391178
Mbuti	Bengali	Guanzhuang	China_HMMH_MN	-0.0047	-1.179	19513	19698	391144
Mbuti	Tonga_2700BP	Guanzhuang	China_HMMH_MN	-0.0133	-1.146	2696	2768	53991
Mbuti	Turkmenistan_C_Namazga_1d	Guanzhuang	China_HMMH_MN	-0.0232	-1.126	694	727	14723
Mbuti	Boshan	Guanzhuang	China_HMMH_MN	-0.0063	-1.103	16005	16207	312585
Mbuti	Vanuatu_3000BP	Guanzhuang	China_HMMH_MN	-0.0145	-1.101	1917	1973	37731
Mbuti	Nepal_Mebrak_2125BP	Guanzhuang	China_HMMH_MN	-0.0069	-1.097	13332	13517	257895
Mbuti	Vanuatu_2900BP_all	Guanzhuang	China_HMMH_MN	-0.0121	-1.096	3201	3279	62905
Mbuti	Punjabi	Guanzhuang	China_HMMH_MN	-0.0039	-1.062	19478	19631	391187
Mbuti	Hazara	Guanzhuang	China_HMMH_MN	-0.0042	-1.042	19814	19979	391130
Mbuti	English	Guanzhuang	China_HMMH_MN	-0.0045	-1.042	19349	19522	391159
Mbuti	Samaritan	Guanzhuang	China_HMMH_MN	-0.0048	-1.016	18927	19111	388905
Mbuti	Russia_MBA_Poltavka	Guanzhuang	China_HMMH_MN	-0.0052	-1.01	14766	14921	300154
Mbuti	Relli_1	Guanzhuang	China_HMMH_MN	-0.0048	-0.998	19503	19690	390803
Mbuti	Madiga	Guanzhuang	China_HMMH_MN	-0.004	-0.993	19480	19636	391158
Mbuti	Russia_AfontovaGora2	Guanzhuang	China_HMMH_MN	-0.0163	-0.99	1071	1107	21810
Mbuti	Ukraine_Scythian	Guanzhuang	China_HMMH_MN	-0.0044	-0.972	18744	18911	379614
Mbuti	Russia_IA_EarlySarmatian	Guanzhuang	China_HMMH_MN	-0.0055	-0.968	11872	12003	240905
Mbuti	Jew_Yemenite	Guanzhuang	China_HMMH_MN	-0.0037	-0.926	19009	19150	391160
Mbuti	Russian	Guanzhuang	China_HMMH_MN	-0.0038	-0.922	19456	19604	391167
Mbuti	Lezgin	Guanzhuang	China_HMMH_MN	-0.0035	-0.889	19284	19419	391166
Mbuti	Bulgaria_Varna_C	Guanzhuang	China_HMMH_MN	-0.0068	-0.868	6043	6126	125620
Mbuti	Estonian	Guanzhuang	China_HMMH_MN	-0.0034	-0.849	19406	19540	391156
Mbuti	Armenia_EBA	Guanzhuang	China_HMMH_MN	-0.0037	-0.828	16363	16484	334797
Mbuti	Japan_Jomon	Guanzhuang	China_HMMH_MN	-0.0049	-0.824	16448	16609	321754
Mbuti	Yadava	Guanzhuang	China_HMMH_MN	-0.0032	-0.812	19477	19602	391142
Mbuti	Bougainville	Guanzhuang	China_HMMH_MN	-0.0037	-0.812	19625	19770	391017
Mbuti	Russia_MLBA_Sintashta	Guanzhuang	China_HMMH_MN	-0.0026	-0.753	19490	19592	391893
Mbuti	Papuan	Guanzhuang	China_HMMH_MN	-0.0032	-0.746	19527	19652	391184
Mbuti	Turkey_EBA_II	Guanzhuang	China_HMMH_MN	-0.0035	-0.746	17442	17566	358385
Mbuti	Russia_Siberia_Lena_EBA_o	Guanzhuang	China_HMMH_MN	-0.0121	-0.728	1068	1094	21656
Mbuti	Kazakhstan_Nomad_IA_o	Guanzhuang	China_HMMH_MN	-0.0056	-0.694	5032	5088	102728
Mbuti	Myanmar_LN_BA_published_lc	Guanzhuang	China_HMMH_MN	-0.0274	-0.692	211	223	4412
Mbuti	Turkmenistan_Gonur_BA_1	Guanzhuang	China_HMMH_MN	-0.0028	-0.67	15000	15085	305730
Mbuti	Bulgaria_IA	Guanzhuang	China_HMMH_MN	-0.0046	-0.669	8768	8849	179467
Mbuti	Mongolia_Tuv_Xiongnu	Guanzhuang	China_HMMH_MN	-0.0036	-0.667	17441	17567	335679
Mbuti	Mongolia_Selenge_XiongnuMedieval_o1	Guanzhuang	China_HMMH_MN	-0.0055	-0.649	4807	4860	93709
Mbuti	Kazakhstan_Karakhanid	Guanzhuang	China_HMMH_MN	-0.0038	-0.648	11257	11344	224689
Mbuti	Albanian	Guanzhuang	China_HMMH_MN	-0.0031	-0.634	19335	19455	390723
Mbuti	Vanuatu_2900BP	Guanzhuang	China_HMMH_MN	-0.0079	-0.61	2157	2191	42691
Mbuti	Estonia_CordedWare	Guanzhuang	China_HMMH_MN	-0.0027	-0.604	17424	17520	354925
Mbuti	Moldova_Glinoe_Scythian	Guanzhuang	China_HMMH_MN	-0.0025	-0.603	19071	19166	384520
Mbuti	Russia_Samara_EBA_Yamnaya	Guanzhuang	China_HMMH_MN	-0.0024	-0.598	18647	18736	376642
Mbuti	China_WLR_BA	Guanzhuang	China_HMMH_MN	-0.0034	-0.594	10678	10751	206696
Mbuti	Greece_Minoan_Lassithi	Guanzhuang	China_HMMH_MN	-0.0026	-0.589	16462	16549	338805
Mbuti	Lebanon_MBA	Guanzhuang	China_HMMH_MN	-0.0023	-0.578	19737	19826	399810
Mbuti	Icelandic	Guanzhuang	China_HMMH_MN	-0.0023	-0.566	19438	19528	391154
Mbuti	Quechua	Guanzhuang	China_HMMH_MN	-0.0026	-0.555	20182	20285	391146
Mbuti	Poland_Globular_Amphora_published	Guanzhuang	China_HMMH_MN	-0.0091	-0.541	1043	1062	21423
Mbuti	Mongolia_Bulgan_LatEMedieval	Guanzhuang	China_HMMH_MN	-0.0031	-0.536	13442	13526	260802
Mbuti	Russia_Afanasievo	Guanzhuang	China_HMMH_MN	-0.002	-0.511	19966	20048	399624
Mbuti	USA_WA_Kennewick	Guanzhuang	China_HMMH_MN	-0.0033	-0.507	12834	12919	249449
Mbuti	Daur	Guanzhuang	China_HMMH_MN	-0.0024	-0.502	20318	20418	390200
Mbuti	Kalash	Guanzhuang	China_HMMH_MN	-0.0021	-0.501	19438	19520	391158
Mbuti	Hungary_IA_Scythian	Guanzhuang	China_HMMH_MN	-0.0023	-0.494	17406	17485	353361
Mbuti	Kazakhstan_Turk	Guanzhuang	China_HMMH_MN	-0.0025	-0.492	18420	18514	365566
Mbuti	China_Miaozigou_MN	Guanzhuang	China_HMMH_MN	-0.0036	-0.491	6007	6051	115888
Mbuti	Russia_Alan	Guanzhuang	China_HMMH_MN	-0.002	-0.487	19863	19941	400249
Mbuti	Finnish	Guanzhuang	China_HMMH_MN	-0.0017	-0.452	19464	19531	391180
Mbuti	Mongolia_Arkhangai_XiongnuEarlyMedieval_3	Guanzhuang	China_HMMH_MN	-0.0017	-0.441	20081	20148	391751
Mbuti	Italy_Sicily_HG_OrienteC	Guanzhuang	China_HMMH_MN	-0.008	-0.438	868	882	17552
Mbuti	Vietnam_N_all_published	Guanzhuang	China_HMMH_MN	-0.0061	-0.436	1680	1701	33973
Mbuti	Germany_CordedWare	Guanzhuang	China_HMMH_MN	-0.0017	-0.434	19065	19130	383932
Mbuti	Georgia_Kotias	Guanzhuang	China_HMMH_MN	-0.0022	-0.411	19836	19922	402441
Mbuti	Bulgarian	Guanzhuang	China_HMMH_MN	-0.0016	-0.385	19303	19363	391097
Mbuti	Laos_Hoabinhian	Guanzhuang	China_HMMH_MN	-0.0025	-0.38	8957	9002	183304
Mbuti	Chane	Guanzhuang	China_HMMH_MN	-0.0019	-0.371	20184	20263	390622
Mbuti	Kashmiri_Pandit	Guanzhuang	China_HMMH_MN	-0.0018	-0.368	19395	19464	390376
Mbuti	Georgia_Satsurblia	Guanzhuang	China_HMMH_MN	-0.0019	-0.349	14434	14490	294116
Mbuti	Germany_BellBeaker	Guanzhuang	China_HMMH_MN	-0.0011	-0.331	19408	19453	391125
Mbuti	Russia_NorthOssetian	Guanzhuang	China_HMMH_MN	-0.0013	-0.316	19442	19493	391169
Mbuti	Russia_HG_Karelia	Guanzhuang	China_HMMH_MN	-0.0017	-0.306	16889	16947	341338
Mbuti	Armenia_C	Guanzhuang	China_HMMH_MN	-0.0012	-0.269	16909	16948	344764
Mbuti	Makrani	Guanzhuang	China_HMMH_MN	-0.0011	-0.264	19223	19264	391141
Mbuti	Russia_Abkhasian	Guanzhuang	China_HMMH_MN	-0.0011	-0.255	19319	19360	391149
Mbuti	Kazakhstan_Kipchak1	Guanzhuang	China_HMMH_MN	-0.0015	-0.253	13698	13739	273763
Mbuti	Kazakhstan_Nomad_IA	Guanzhuang	China_HMMH_MN	-0.0013	-0.24	13908	13943	278156
Mbuti	Pathan	Guanzhuang	China_HMMH_MN	-0.0009	-0.238	19432	19468	391158
Mbuti	China_Xinjian_IA	Guanzhuang	China_HMMH_MN	-0.0011	-0.23	14612	14645	286389
Mbuti	Armenian	Guanzhuang	China_HMMH_MN	-0.0008	-0.199	19305	19337	391150
Mbuti	Mongolia_Xiongnu_o2	Guanzhuang	China_HMMH_MN	-0.0008	-0.168	18650	18681	370940
Mbuti	Irula	Guanzhuang	China_HMMH_MN	-0.0005	-0.132	19527	19547	391155
Mbuti	Kongo	Guanzhuang	China_HMMH_MN	-0.0005	-0.125	15716	15731	390051
Mbuti	Brahmin	Guanzhuang	China_HMMH_MN	-0.0003	-0.078	19452	19463	391159
Mbuti	Brahui	Guanzhuang	China_HMMH_MN	-0.0003	-0.067	19309	19319	391146
Mbuti	Russia_Srubnaya	Guanzhuang	China_HMMH_MN	-0.0002	-0.058	19380	19388	388811
Mbuti	Russia_LBA_1	Guanzhuang	China_HMMH_MN	-0.0009	-0.058	1112	1114	22910
Mbuti	Kazakhstan_Kumsay_EBA	Guanzhuang	China_HMMH_MN	-0.0002	-0.038	15474	15479	309028
Mbuti	Spain_C	Guanzhuang	China_HMMH_MN	0	-0.011	19210	19212	387788
Mbuti	Mayan	Guanzhuang	China_HMMH_MN	0	0.009	20263	20261	391103
Mbuti	Polish	Guanzhuang	China_HMMH_MN	0	0.009	19373	19372	390460
Mbuti	Russia_Samara_EBA_Yamnaya_published2	Guanzhuang	China_HMMH_MN	0.0003	0.054	18289	18278	368086
Mbuti	Australian	Guanzhuang	China_HMMH_MN	0.0003	0.067	19597	19585	391097
Mbuti	Turkey_MLBA_AssyrianColonyPeriod	Guanzhuang	China_HMMH_MN	0.0004	0.07	12939	12930	264169
Mbuti	Russia_SaltovoMayaki	Guanzhuang	China_HMMH_MN	0.001	0.071	1437	1434	30515
Mbuti	Mala	Guanzhuang	China_HMMH_MN	0.0005	0.122	19586	19568	391174
Mbuti	Sweden_Motala_HG	Guanzhuang	China_HMMH_MN	0.0006	0.128	17462	17443	352381
Mbuti	Palestinian	Guanzhuang	China_HMMH_MN	0.0005	0.143	19051	19031	391177
Mbuti	Spain_EN	Guanzhuang	China_HMMH_MN	0.0006	0.151	17441	17420	355724
Mbuti	Italy_North_Villabruna_HG	Guanzhuang	China_HMMH_MN	0.001	0.164	13443	13416	274438
Mbuti	Mexico_Zapotec	Guanzhuang	China_HMMH_MN	0.0008	0.175	20235	20203	391132
Mbuti	Russia_Andronovo	Guanzhuang	China_HMMH_MN	0.0008	0.198	19773	19739	397822
Mbuti	Moldova_Cimmerian	Guanzhuang	China_HMMH_MN	0.001	0.2	13637	13610	271106
Mbuti	Russia_Samara_EBA_Yamnaya_published	Guanzhuang	China_HMMH_MN	0.0014	0.202	9064	9039	185975
Mbuti	Russia_KuengaRiver_N_1	Guanzhuang	China_HMMH_MN	0.0031	0.206	1422	1414	27377
Mbuti	Russia_Tuva_IA_AldyBel	Guanzhuang	China_HMMH_MN	0.0012	0.206	12436	12407	249050
Mbuti	Karitiana	Guanzhuang	China_HMMH_MN	0.001	0.206	20332	20294	391167
Mbuti	Mongolia_Dundgobi_LatEMedieval	Guanzhuang	China_HMMH_MN	0.0014	0.232	13625	13587	262377
Mbuti	Druze	Guanzhuang	China_HMMH_MN	0.001	0.233	19216	19178	391140
Mbuti	Bulgaria_BeliBreyag_EBA	Guanzhuang	China_HMMH_MN	0.0024	0.237	3600	3583	74981
Mbuti	Armenia_LBA	Guanzhuang	China_HMMH_MN	0.0014	0.24	7866	7844	163696
Mbuti	Mixtec_1	Guanzhuang	China_HMMH_MN	0.0012	0.243	20137	20088	389906
Mbuti	Turkey_N	Guanzhuang	China_HMMH_MN	0.0009	0.244	19496	19460	394096
Mbuti	Spain_ElMiron	Guanzhuang	China_HMMH_MN	0.0017	0.247	8543	8514	178493
Mbuti	Mixe	Guanzhuang	China_HMMH_MN	0.0012	0.28	20284	20234	391172
Mbuti	Kurumba	Guanzhuang	China_HMMH_MN	0.0014	0.289	19457	19404	389025
Mbuti	Kapu	Guanzhuang	China_HMMH_MN	0.0012	0.302	19638	19592	391159
Mbuti	Nahua	Guanzhuang	China_HMMH_MN	0.0016	0.316	20226	20161	390700
Mbuti	Canada_MDorset_published	Guanzhuang	China_HMMH_MN	0.0047	0.322	1659	1644	32055
Mbuti	Israel_C	Guanzhuang	China_HMMH_MN	0.0013	0.33	17428	17383	356039
Mbuti	Philippines_RedSlippedPottery	Guanzhuang	China_HMMH_MN	0.0092	0.342	376	369	7480
Mbuti	Bergamo	Guanzhuang	China_HMMH_MN	0.0017	0.342	19350	19285	390220
Mbuti	Russia_EarlyMedieval_Heshui_Mohe_1	Guanzhuang	China_HMMH_MN	0.0035	0.367	4010	3982	77232
Mbuti	Iran_GanjDareh_N	Guanzhuang	China_HMMH_MN	0.0016	0.377	17458	17403	357119
Mbuti	Germany_EN_LBK	Guanzhuang	China_HMMH_MN	0.0014	0.385	19254	19199	389548
Mbuti	Mongolia_Sukhbaatar_MLBAXiongnuLatEMedieval_sister	Guanzhuang	China_HMMH_MN	0.0075	0.417	1022	1007	19473
Mbuti	Chipewyan	Guanzhuang	China_HMMH_MN	0.002	0.423	20303	20222	391161
Mbuti	Kazakhstan_Karluk_1	Guanzhuang	China_HMMH_MN	0.0026	0.501	19166	19065	375212
Mbuti	Russia_Potapovka	Guanzhuang	China_HMMH_MN	0.0061	0.504	2311	2283	46540
Mbuti	Russia_MA1_HG	Guanzhuang	China_HMMH_MN	0.0031	0.513	13819	13734	275127
Mbuti	Kazakhstan_Kangju_o1	Guanzhuang	China_HMMH_MN	0.0028	0.519	12972	12900	261643
Mbuti	Turkmenistan_C_Namazga	Guanzhuang	China_HMMH_MN	0.0029	0.527	11674	11606	241209
Mbuti	Balochi	Guanzhuang	China_HMMH_MN	0.0021	0.536	19407	19324	391124
Mbuti	Russia_Kalmykia_EBA_Yamnaya	Guanzhuang	China_HMMH_MN	0.0023	0.543	18646	18561	375137
Mbuti	Russia_CentralYakutia_IA	Guanzhuang	China_HMMH_MN	0.0084	0.546	1426	1403	26566
Mbuti	China_AR_IA	Guanzhuang	China_HMMH_MN	0.0095	0.551	949	931	18702
Mbuti	Kazakhstan_Wusun	Guanzhuang	China_HMMH_MN	0.0029	0.591	18285	18180	364844
Mbuti	BedouinB	Guanzhuang	China_HMMH_MN	0.0025	0.617	19088	18992	391128
Mbuti	Lemande	Guanzhuang	China_HMMH_MN	0.0023	0.643	15918	15846	391139
Mbuti	Mongolia_Arkhangai_EarlyMedieval	Guanzhuang	China_HMMH_MN	0.0022	0.643	19626	19541	391242
Mbuti	Mongolia_Khuvsgul_XiongnuLatEMedieval_1	Guanzhuang	China_HMMH_MN	0.0026	0.646	17985	17893	355901
Mbuti	Czech	Guanzhuang	China_HMMH_MN	0.0031	0.661	19503	19383	390399
Mbuti	Cree1	Guanzhuang	China_HMMH_MN	0.0032	0.672	20012	19882	390445
Mbuti	Mongolia_Arkhangai_XiongnuEarlyMedieval_1	Guanzhuang	China_HMMH_MN	0.0041	0.719	14854	14732	298896
Mbuti	Kyrgyzstan_Medieval_Nomad_o	Guanzhuang	China_HMMH_MN	0.005	0.727	8630	8544	168644
Mbuti	Mongolia_Tuv_LatEMedieval	Guanzhuang	China_HMMH_MN	0.0033	0.734	16942	16831	325637
Mbuti	Pakistan_Loebanr_IA	Guanzhuang	China_HMMH_MN	0.0026	0.76	19164	19066	383957
Mbuti	Kazakhstan_Botai_Eneolithic	Guanzhuang	China_HMMH_MN	0.0039	0.776	14890	14774	295237
Mbuti	Tuscan_1	Guanzhuang	China_HMMH_MN	0.0032	0.797	19422	19297	391150
Mbuti	Bulgaria_C	Guanzhuang	China_HMMH_MN	0.0033	0.805	16864	16753	342043
Mbuti	Iran_C_SehGabi	Guanzhuang	China_HMMH_MN	0.0035	0.806	16922	16805	343150
Mbuti	Igbo	Guanzhuang	China_HMMH_MN	0.0027	0.808	15905	15818	391152
Mbuti	USA_Anzick_realigned	Guanzhuang	China_HMMH_MN	0.0046	0.816	20647	20457	397002
Mbuti	Mongolia_EBA_Chemurchek_2	Guanzhuang	China_HMMH_MN	0.0045	0.85	14429	14301	289170
Mbuti	Russia_Mezhovskaya	Guanzhuang	China_HMMH_MN	0.0045	0.851	17653	17497	353665
Mbuti	Russia_AfontovaGora3	Guanzhuang	China_HMMH_MN	0.0091	0.882	3378	3317	70463
Mbuti	Kyrgyzstan_TianShan_Hun	Guanzhuang	China_HMMH_MN	0.0031	0.932	20467	20342	402623
Mbuti	Canada_MDorset	Guanzhuang	China_HMMH_MN	0.0153	0.933	1123	1089	21619
Mbuti	Spain_HG	Guanzhuang	China_HMMH_MN	0.0053	0.944	16337	16164	327003
Mbuti	USA_Ancient_Beringian	Guanzhuang	China_HMMH_MN	0.0051	0.968	21019	20805	402638
Mbuti	Mongolia_Chalcolithic_Afanasievo_1	Guanzhuang	China_HMMH_MN	0.0059	0.971	11625	11489	233164
Mbuti	Kazakhstan_TianShan_Saka	Guanzhuang	China_HMMH_MN	0.0143	0.995	1381	1342	27392
Mbuti	Hezhen	Guanzhuang	China_HMMH_MN	0.0046	1.054	20515	20328	391160
Mbuti	Piapoco	Guanzhuang	China_HMMH_MN	0.005	1.065	20333	20130	391124
Mbuti	Russia_Siberia_Tenisei_EBA	Guanzhuang	China_HMMH_MN	0.0069	1.083	12686	12512	248202
Mbuti	Kazakhstan_IA_Saka_dup	Guanzhuang	China_HMMH_MN	0.0119	1.09	2722	2658	53819
Mbuti	China_WLR_MN	Guanzhuang	China_HMMH_MN	0.0056	1.105	21149	20914	399407
Mbuti	Kazakhstan_Nomad_Hun_Sarmatian	Guanzhuang	China_HMMH_MN	0.0058	1.151	17991	17783	345449
Mbuti	Russia_DevilsCave_N	Guanzhuang	China_HMMH_MN	0.0054	1.185	21232	21005	402559
Mbuti	Kazakhstan_Kimak	Guanzhuang	China_HMMH_MN	0.0111	1.208	4045	3957	78525
Mbuti	Kazakhstan_Central_Saka	Guanzhuang	China_HMMH_MN	0.0049	1.224	19768	19576	386449
Mbuti	Spain_MLN	Guanzhuang	China_HMMH_MN	0.0045	1.244	19090	18919	384131
Mbuti	China_AmurRiver_BA	Guanzhuang	China_HMMH_MN	0.0453	1.317	286	261	5049
Mbuti	Mongolia_Uvurkhangai_EIALatEMedieval	Guanzhuang	China_HMMH_MN	0.0066	1.34	16742	16522	321102
Mbuti	Aleut	Guanzhuang	China_HMMH_MN	0.0056	1.348	20080	19855	391168
Mbuti	Russia_IA_2	Guanzhuang	China_HMMH_MN	0.0083	1.357	14164	13931	277577
Mbuti	Mongolia_Khentii_EIA_SlabGrave	Guanzhuang	China_HMMH_MN	0.017	1.369	2127	2056	41395
Mbuti	Tubalar	Guanzhuang	China_HMMH_MN	0.0056	1.407	20137	19912	391163
Mbuti	Jordan_EBA	Guanzhuang	China_HMMH_MN	0.0071	1.414	12973	12791	265769
Mbuti	Kazakhstan_Wusun_LateSaka_dup	Guanzhuang	China_HMMH_MN	0.0134	1.483	4352	4237	84823
Mbuti	Mongolia_Ulaanbaatar_EIALatEMedieval	Guanzhuang	China_HMMH_MN	0.0101	1.494	8170	8007	157261
Mbuti	Altaian	Guanzhuang	China_HMMH_MN	0.0075	1.521	20274	19970	390469
Mbuti	Mbuti	Guanzhuang	China_HMMH_MN	0.0023	1.529	13062	13003	391178
Mbuti	Israel_Natufian_published	Guanzhuang	China_HMMH_MN	0.0166	1.555	2726	2637	56015
Mbuti	Kazakhstan_ZevakinoChilikta_IA_2	Guanzhuang	China_HMMH_MN	0.0125	1.57	5309	5178	103717
Mbuti	Pima	Guanzhuang	China_HMMH_MN	0.0076	1.624	20427	20119	391132
Mbuti	Kazakhstan_Central_Steppe_EMBA	Guanzhuang	China_HMMH_MN	0.0074	1.654	20740	20436	402548
Mbuti	Surui	Guanzhuang	China_HMMH_MN	0.0089	1.738	20505	20143	391131
Mbuti	Jordan_PPNB_published	Guanzhuang	China_HMMH_MN	0.0206	1.768	2222	2132	45548
Mbuti	Chukchi	Guanzhuang	China_HMMH_MN	0.0087	1.769	20124	19779	390772
Mbuti	Kazakhstan_Nomad_HP	Guanzhuang	China_HMMH_MN	0.0081	1.799	20418	20089	389639
Mbuti	Mongolia_Khovd_MLBAXiongnuLatEMedieval	Guanzhuang	China_HMMH_MN	0.0124	1.802	8754	8540	167313
Mbuti	Russia_Karasuk_oRISE	Guanzhuang	China_HMMH_MN	0.0069	1.815	20435	20156	401376
Mbuti	Mongolia_EIA_Xiongnu_7	Guanzhuang	China_HMMH_MN	0.0111	1.846	12286	12017	234669
Mbuti	Mongolia_Sukhbaatar_LatEMedieval	Guanzhuang	China_HMMH_MN	0.0066	1.848	20900	20625	396718
Mbuti	Eskimo_Sireniki	Guanzhuang	China_HMMH_MN	0.0085	1.852	20519	20175	391168
Mbuti	Mongolia_Arkhangai_XiongnuEarlyMedieval_2	Guanzhuang	China_HMMH_MN	0.0096	1.873	13799	13536	276740
Mbuti	China_AmurRiver_LPaleolithic	Guanzhuang	China_HMMH_MN	0.0096	1.909	14037	13769	271039
Mbuti	Mongolia_Uvs_EIAXiongnuLateMedival	Guanzhuang	China_HMMH_MN	0.0074	2.018	19567	19277	383253
Mbuti	Russia_Buryatia_Xiongnu_mother	Guanzhuang	China_HMMH_MN	0.0134	2.04	12099	11778	231071
Mbuti	Mongolia_LBA_CenterWest_4_o	Guanzhuang	China_HMMH_MN	0.0124	2.049	12776	12463	244319
Mbuti	Mongolia_Khentii_Xiongnu_daughter	Guanzhuang	China_HMMH_MN	0.0147	2.099	10105	9812	193023
Mbuti	Mongolia_Bulgan_Xiongnu	Guanzhuang	China_HMMH_MN	0.0099	2.117	17165	16828	328275
Mbuti	Buryat	Guanzhuang	China_HMMH_MN	0.0081	2.129	21151	20813	402674
Mbuti	Russia_Chita_BA	Guanzhuang	China_HMMH_MN	0.0227	2.245	3216	3073	60544
Mbuti	Russia_BA_Okunevo	Guanzhuang	China_HMMH_MN	0.0083	2.246	20671	20332	402575
Mbuti	Eskimo_Chaplin	Guanzhuang	China_HMMH_MN	0.0117	2.311	20552	20078	390800
Mbuti	Mongolia_Khovd_MLBAEarlyMedieval	Guanzhuang	China_HMMH_MN	0.0108	2.321	17616	17240	345761
Mbuti	Oroqen	Guanzhuang	China_HMMH_MN	0.0107	2.433	20693	20256	391140
Mbuti	Russia_Siberia_UP	Guanzhuang	China_HMMH_MN	0.0167	2.471	9425	9115	182225
Mbuti	Mongolia_Umungobi_LatEMedieval	Guanzhuang	China_HMMH_MN	0.0103	2.567	18902	18518	361281
Mbuti	Mongolia_Uvurkhangai_Xiongnu	Guanzhuang	China_HMMH_MN	0.0126	2.601	17821	17376	338803
Mbuti	Mansi	Guanzhuang	China_HMMH_MN	0.0107	2.628	20175	19748	391164
Mbuti	China_AmurRiver_EarlyN	Guanzhuang	China_HMMH_MN	0.0153	2.651	11676	11324	222991
Mbuti	Koryak	Guanzhuang	China_HMMH_MN	0.0123	2.68	21317	20800	402659
Mbuti	Mongolia_Sukhbaatar_MLBA	Guanzhuang	China_HMMH_MN	0.0182	2.704	10034	9675	190788
Mbuti	Mongolia_IA_Xianbei	Guanzhuang	China_HMMH_MN	0.0167	2.808	12613	12199	241695
Mbuti	China_AR_Xianbei_IA	Guanzhuang	China_HMMH_MN	0.0237	2.824	5164	4925	96612
Mbuti	Kazakhstan_Korgantas_IA	Guanzhuang	China_HMMH_MN	0.0167	2.926	15574	15064	295413
Mbuti	Kazakhstan_GoldenHordeAsian	Guanzhuang	China_HMMH_MN	0.0159	2.957	20253	19618	382118
Mbuti	Russia_IA_Yankovsky	Guanzhuang	China_HMMH_MN	0.0212	2.997	10164	9741	192073
Mbuti	Kazakhstan_Berel_IA_o3	Guanzhuang	China_HMMH_MN	0.013	3.038	19953	19441	379454
Mbuti	Mongolia_Tuv_EIA	Guanzhuang	China_HMMH_MN	0.0218	3.053	9645	9234	181147
Mbuti	Mongolia_Arkhangai_MLBAtoEIAorMedieval_o	Guanzhuang	China_HMMH_MN	0.0305	3.06	3389	3188	63580
Mbuti	Mongolia_Dornod_PreBronze	Guanzhuang	China_HMMH_MN	0.0329	3.1	3112	2913	58834
Mbuti	Mongolia_LBA_Ulaanzukh_2_dup	Guanzhuang	China_HMMH_MN	0.0194	3.156	14024	13490	267263
Mbuti	Ulchi	Guanzhuang	China_HMMH_MN	0.0143	3.215	20771	20185	391142
Mbuti	Russia_UstIda_LN	Guanzhuang	China_HMMH_MN	0.0152	3.216	19514	18929	372910
Mbuti	Russia_Blagovechensk_IA	Guanzhuang	China_HMMH_MN	0.0233	3.355	8846	8444	163940
Mbuti	Mongolia_Arkhangai_Xiongnu_o	Guanzhuang	China_HMMH_MN	0.0197	3.413	16810	16160	316595
Mbuti	Russia_UstIda_EBA	Guanzhuang	China_HMMH_MN	0.0164	3.461	16025	15507	306341
Mbuti	Yakut	Guanzhuang	China_HMMH_MN	0.0152	3.47	20712	20094	391146
Mbuti	Russia_Krasnoyarsk_BA	Guanzhuang	China_HMMH_MN	0.0195	3.482	21465	20645	402487
Mbuti	Canada_LateDorset	Guanzhuang	China_HMMH_MN	0.0309	3.49	4936	4641	93191
Mbuti	Russia_MN_Boisman	Guanzhuang	China_HMMH_MN	0.0158	3.495	17491	16948	330316
Mbuti	China_AmurRiver_N	Guanzhuang	China_HMMH_MN	0.0173	3.57	13585	13123	259055
Mbuti	Russia_KolymaRiver_LN_1d	Guanzhuang	China_HMMH_MN	0.0263	3.577	7944	7537	148001
Mbuti	Mongolia_Khentii_LatEMedieval	Guanzhuang	China_HMMH_MN	0.018	3.602	17014	16411	322499
Mbuti	Mongolia_Bulgan_EarlyMedievalLatEMedieval	Guanzhuang	China_HMMH_MN	0.0148	3.637	20070	19483	380382
Mbuti	China_AR_EN	Guanzhuang	China_HMMH_MN	0.0263	3.694	6493	6160	121867
Mbuti	Eskimo_Naukan	Guanzhuang	China_HMMH_MN	0.0171	3.773	20697	20001	391144
Mbuti	Mongolia_EIA_8	Guanzhuang	China_HMMH_MN	0.0245	3.939	12535	11936	236549
Mbuti	Russia_UstBelaya_Angara	Guanzhuang	China_HMMH_MN	0.0164	4.016	19743	19104	372873
Mbuti	Mongolia_Dornod_Xiongnu	Guanzhuang	China_HMMH_MN	0.0234	4.093	16417	15665	309361
Mbuti	Mongolia_Dornod_LatEMedieval	Guanzhuang	China_HMMH_MN	0.0164	4.134	20098	19450	380124
Mbuti	Russia_KolymaRiver_LN	Guanzhuang	China_HMMH_MN	0.0188	4.165	21467	20675	402608
Mbuti	Russia_Kurma_EBA	Guanzhuang	China_HMMH_MN	0.0243	4.224	12917	12306	245098
Mbuti	Russia_Shamanka_EBA	Guanzhuang	China_HMMH_MN	0.0196	4.275	19657	18903	370837
Mbuti	Kazakhstan_IA_Berel_Pazyryk	Guanzhuang	China_HMMH_MN	0.0207	4.38	18363	17619	353800
Mbuti	Russia_AginBuryat_N	Guanzhuang	China_HMMH_MN	0.0313	4.384	7447	6995	137270
Mbuti	Russia_Buryatia_Xiongnu	Guanzhuang	China_HMMH_MN	0.0183	4.395	19288	18595	364504
Mbuti	Mongolia_Khuvsgul_XiongnuLatEMedieval_2	Guanzhuang	China_HMMH_MN	0.0186	4.418	19411	18704	368164
Mbuti	China_WLR_BA_o	Guanzhuang	China_HMMH_MN	0.0265	4.513	14411	13666	269057
Mbuti	Mongolia_Chalcolithic_Afanasievo_2	Guanzhuang	China_HMMH_MN	0.0303	4.599	11267	10605	212486
Mbuti	Greenland_Saqqaq	Guanzhuang	China_HMMH_MN	0.027	4.646	19281	18266	364058
Mbuti	Russia_ArgunRiver_M	Guanzhuang	China_HMMH_MN	0.0264	4.703	21303	20206	396209
Mbuti	Mongolia_EBA_Ulgii_1_dup	Guanzhuang	China_HMMH_MN	0.0285	4.799	16986	16043	320763
Mbuti	Mongolia_Khentii_Xiongnu	Guanzhuang	China_HMMH_MN	0.0271	4.902	15658	14831	292939
Mbuti	Mongolia_LBA_Ulaanzukh_2	Guanzhuang	China_HMMH_MN	0.0236	4.929	15128	14431	285965
Mbuti	Russia_Lokomotiv_Eneolithic	Guanzhuang	China_HMMH_MN	0.0244	5.139	19206	18291	358641
Mbuti	China_AmurRiver_Mesolithic	Guanzhuang	China_HMMH_MN	0.0298	5.241	10617	10004	201326
Mbuti	Russia_Buryatia_PreBronze	Guanzhuang	China_HMMH_MN	0.0287	5.33	14441	13636	270554
Mbuti	Russia_CentralYakutia_LN	Guanzhuang	China_HMMH_MN	0.0277	5.386	21091	19953	390931
Mbuti	Even	Guanzhuang	China_HMMH_MN	0.0237	5.403	20912	19943	391171
Mbuti	Mongolia_Sukhbaatar_MLBAXiongnuLatEMedieval	Guanzhuang	China_HMMH_MN	0.0199	5.424	20748	19939	388718
Mbuti	Mongolia_Arkhangai_PreBronze	Guanzhuang	China_HMMH_MN	0.0341	5.467	13340	12460	249601
Mbuti	Russia_LenaRiver_EN	Guanzhuang	China_HMMH_MN	0.0314	5.496	18245	17135	336911
Mbuti	Russia_AngaraRiver_EN	Guanzhuang	China_HMMH_MN	0.03	5.543	20518	19322	381162
Mbuti	Russia_KuengaRiver_N_2	Guanzhuang	China_HMMH_MN	0.0313	5.585	19647	18455	362029
Mbuti	Russia_Siberia_Irkutsk_EBA	Guanzhuang	China_HMMH_MN	0.0297	5.848	17104	16118	320146
Mbuti	Mongolia_EIA_SlabGrave_1	Guanzhuang	China_HMMH_MN	0.0222	5.872	20331	19448	379876
Mbuti	Russia_KadalinkaRiver_N	Guanzhuang	China_HMMH_MN	0.0322	5.878	20369	19099	375599
Mbuti	China_NEastAsia_Inland_EN	Guanzhuang	China_HMMH_MN	0.0404	6.652	13650	12590	256133
Mbuti	Yumin	Guanzhuang	China_HMMH_MN	0.0404	6.652	13650	12590	256133
Mbuti	Russia_Shamanka_Eneolithic	Guanzhuang	China_HMMH_MN	0.0252	6.803	21644	20578	402632
Mbuti	Mongolia_East_N	Guanzhuang	China_HMMH_MN	0.0399	7.902	17444	16106	320923
Mbuti	Mongolia_North_N	Guanzhuang	China_HMMH_MN	0.0389	9.149	19155	17719	354143

## Sheet: D
Table S2D. f4(Mbuti, Reference; X, Guanzhuang) to evaluate the genetic divergence between the Guanzhuang population and population X. The 'Reference' group consists of 287 ancient and contemporary populations, while population X includes ancient populations from various regions of East Asia. |Z|>3 indicates the significant values, highlighted in Datas by blue (positive) and red (negative) ; 2<|Z|…
f4(Mbuti, Reference; Guanzhuang, China_Miaozigou_MN)
pop1	pop2	pop3	pop4	f4	Z	ABAB	ABBA	SNPs
Mbuti	JPT	Guanzhuang	China_Miaozigou_MN	-0.0086	-2.367	9258	9419	180824
Mbuti	Indonesia_LN_BA_IA	Guanzhuang	China_Miaozigou_MN	-0.0442	-2.319	766	836	16203
Mbuti	Shenxian	Guanzhuang	China_Miaozigou_MN	-0.019	-2.208	4537	4713	92037
Mbuti	Xitoucun	Guanzhuang	China_Miaozigou_MN	-0.0175	-2.139	3845	3982	78302
Mbuti	Taiwan_Liangdao_LatePaleolithic	Guanzhuang	China_Miaozigou_MN	-0.0316	-2.128	1254	1336	24338
Mbuti	Tonga_2500BP	Guanzhuang	China_Miaozigou_MN	-0.0272	-2.081	1699	1794	34974
Mbuti	KHV	Guanzhuang	China_Miaozigou_MN	-0.007	-1.916	9222	9351	180824
Mbuti	Atayal	Guanzhuang	China_Miaozigou_MN	-0.0105	-1.89	8949	9138	176292
Mbuti	RIA	Guanzhuang	China_Miaozigou_MN	-0.0073	-1.87	9104	9238	179885
Mbuti	USA_WA_Kennewick	Guanzhuang	China_Miaozigou_MN	-0.0138	-1.774	5441	5594	108555
Mbuti	Lebanon_MBA	Guanzhuang	China_Miaozigou_MN	-0.0082	-1.757	8622	8765	179479
Mbuti	Kongo	Guanzhuang	China_Miaozigou_MN	-0.0081	-1.711	6925	7039	176115
Mbuti	CHS	Guanzhuang	China_Miaozigou_MN	-0.0059	-1.608	9277	9387	180824
Mbuti	CDX	Guanzhuang	China_Miaozigou_MN	-0.0058	-1.598	9235	9343	180824
Mbuti	Malaysia_historical	Guanzhuang	China_Miaozigou_MN	-0.0135	-1.509	3851	3957	77054
Mbuti	ONG	Guanzhuang	China_Miaozigou_MN	-0.007	-1.492	8849	8974	179876
Mbuti	China_SEastAsia_Coastal_LN	Guanzhuang	China_Miaozigou_MN	-0.0106	-1.436	4712	4813	94530
Mbuti	Mixtec_1	Guanzhuang	China_Miaozigou_MN	-0.0077	-1.42	8808	8945	176046
Mbuti	Sardinian	Guanzhuang	China_Miaozigou_MN	-0.0061	-1.333	8519	8622	176614
Mbuti	Bulgarian	Guanzhuang	China_Miaozigou_MN	-0.0063	-1.317	8543	8651	176577
Mbuti	Ukraine_Scythian	Guanzhuang	China_Miaozigou_MN	-0.0072	-1.299	8248	8368	170518
Mbuti	Greece_BA_Mycenaean	Guanzhuang	China_Miaozigou_MN	-0.011	-1.276	3046	3114	69268
Mbuti	Dusun	Guanzhuang	China_Miaozigou_MN	-0.0057	-1.221	8936	9038	176584
Mbuti	Ami	Guanzhuang	China_Miaozigou_MN	-0.0055	-1.185	9042	9141	176593
Mbuti	Vietnam_BA_all	Guanzhuang	China_Miaozigou_MN	-0.0109	-1.168	3546	3624	69891
Mbuti	China_Tianyuan	Guanzhuang	China_Miaozigou_MN	-0.0084	-1.165	6427	6536	132114
Mbuti	Kinh	Guanzhuang	China_Miaozigou_MN	-0.0052	-1.134	9024	9119	176586
Mbuti	Liangdao1	Guanzhuang	China_Miaozigou_MN	-0.0124	-1.118	2595	2661	54943
Mbuti	Thailand_IA	Guanzhuang	China_Miaozigou_MN	-0.0485	-1.079	139	153	3033
Mbuti	English	Guanzhuang	China_Miaozigou_MN	-0.005	-1.07	8586	8673	176598
Mbuti	Hawaiian	Guanzhuang	China_Miaozigou_MN	-0.0053	-1.047	8947	9043	176054
Mbuti	CHB	Guanzhuang	China_Miaozigou_MN	-0.0038	-1.035	9303	9373	180824
Mbuti	French	Guanzhuang	China_Miaozigou_MN	-0.0047	-1.026	8585	8666	176612
Mbuti	Maori	Guanzhuang	China_Miaozigou_MN	-0.0054	-1.018	8666	8761	176132
Mbuti	Turkmenistan_C_Namazga	Guanzhuang	China_Miaozigou_MN	-0.0075	-0.997	4909	4983	105404
Mbuti	Myanmar_LN_BA_published_lc	Guanzhuang	China_Miaozigou_MN	-0.0541	-0.97	87	97	2055
Mbuti	Vanuatu_2900BP	Guanzhuang	China_Miaozigou_MN	-0.0158	-0.961	1052	1086	20565
Mbuti	Vietnam_BA	Guanzhuang	China_Miaozigou_MN	-0.0111	-0.959	2354	2407	46801
Mbuti	Dai	Guanzhuang	China_Miaozigou_MN	-0.0037	-0.944	9254	9324	180819
Mbuti	Thai	Guanzhuang	China_Miaozigou_MN	-0.004	-0.898	8968	9040	176595
Mbuti	Chechen	Guanzhuang	China_Miaozigou_MN	-0.0047	-0.883	8540	8621	176179
Mbuti	Guanzhuang_o1	Guanzhuang	China_Miaozigou_MN	-0.0339	-0.867	173	185	3587
Mbuti	Igorot	Guanzhuang	China_Miaozigou_MN	-0.0036	-0.777	9009	9075	176604
Mbuti	Madiga	Guanzhuang	China_Miaozigou_MN	-0.0035	-0.776	8644	8704	176606
Mbuti	Tanshishan	Guanzhuang	China_Miaozigou_MN	-0.0081	-0.776	2695	2739	53921
Mbuti	SYC	Guanzhuang	China_Miaozigou_MN	-0.0051	-0.752	5281	5335	101259
Mbuti	Vanuatu_2900BP_all	Guanzhuang	China_Miaozigou_MN	-0.0105	-0.739	1549	1582	30986
Mbuti	Russia_Ust_Ishim	Guanzhuang	China_Miaozigou_MN	-0.0041	-0.738	8058	8124	167013
Mbuti	Sindhi_Pakistan	Guanzhuang	China_Miaozigou_MN	-0.0031	-0.728	8615	8670	176595
Mbuti	Kazakhstan_Nomad_HP	Guanzhuang	China_Miaozigou_MN	-0.0038	-0.72	8840	8907	174602
Mbuti	Bergamo	Guanzhuang	China_Miaozigou_MN	-0.0037	-0.714	8523	8586	176184
Mbuti	Guam_LateUnai_Ritidian	Guanzhuang	China_Miaozigou_MN	-0.0134	-0.714	838	861	17930
Mbuti	Spain_ElMiron	Guanzhuang	China_Miaozigou_MN	-0.0063	-0.695	4127	4180	87452
Mbuti	Laos_Hoabinhian	Guanzhuang	China_Miaozigou_MN	-0.0058	-0.646	3766	3810	79380
Mbuti	Slovakia_Poprad	Guanzhuang	China_Miaozigou_MN	-0.0058	-0.645	3699	3742	77005
Mbuti	Palestinian	Guanzhuang	China_Miaozigou_MN	-0.0027	-0.635	8434	8480	176609
Mbuti	Basque	Guanzhuang	China_Miaozigou_MN	-0.0031	-0.631	8583	8637	176602
Mbuti	Bengali	Guanzhuang	China_Miaozigou_MN	-0.0028	-0.628	8671	8720	176591
Mbuti	Mala	Guanzhuang	China_Miaozigou_MN	-0.0026	-0.612	8652	8697	176613
Mbuti	Korean	Guanzhuang	China_Miaozigou_MN	-0.0028	-0.607	9062	9113	176604
Mbuti	Russia_Tagar	Guanzhuang	China_Miaozigou_MN	-0.0027	-0.59	8870	8919	180067
Mbuti	Hungary_IA_Scythian	Guanzhuang	China_Miaozigou_MN	-0.0034	-0.588	7649	7702	158147
Mbuti	Russia_MA1_HG	Guanzhuang	China_Miaozigou_MN	-0.0044	-0.588	6140	6195	125209
Mbuti	Russia_Samara_EBA_Yamnaya_published	Guanzhuang	China_Miaozigou_MN	-0.005	-0.584	4187	4229	87942
Mbuti	Tuscan_1	Guanzhuang	China_Miaozigou_MN	-0.0027	-0.575	8582	8628	176605
Mbuti	Vietnam_LN	Guanzhuang	China_Miaozigou_MN	-0.0053	-0.573	2945	2977	60134
Mbuti	Baojianshan	Guanzhuang	China_Miaozigou_MN	-0.0043	-0.569	5722	5771	116109
Mbuti	Kalash	Guanzhuang	China_Miaozigou_MN	-0.0025	-0.551	8613	8657	176604
Mbuti	Kapu	Guanzhuang	China_Miaozigou_MN	-0.0025	-0.551	8664	8707	176607
Mbuti	Spanish	Guanzhuang	China_Miaozigou_MN	-0.0026	-0.551	8559	8604	176583
Mbuti	Jew_Yemenite	Guanzhuang	China_Miaozigou_MN	-0.0025	-0.541	8415	8457	176601
Mbuti	Russian	Guanzhuang	China_Miaozigou_MN	-0.0025	-0.536	8639	8681	176609
Mbuti	Spain_HG	Guanzhuang	China_Miaozigou_MN	-0.0037	-0.529	7270	7325	150005
Mbuti	Mongolia_Bulgan_LatEMedieval	Guanzhuang	China_Miaozigou_MN	-0.0038	-0.519	6310	6358	123479
Mbuti	Vanuatu_3000BP	Guanzhuang	China_Miaozigou_MN	-0.0094	-0.512	912	930	18272
Mbuti	Germany_EBA_Unetice	Guanzhuang	China_Miaozigou_MN	-0.0026	-0.502	7931	7972	164300
Mbuti	Brahmin	Guanzhuang	China_Miaozigou_MN	-0.0022	-0.496	8607	8646	176601
Mbuti	Bulgaria_BeliBreyag_EBA	Guanzhuang	China_Miaozigou_MN	-0.0062	-0.475	1860	1883	39289
Mbuti	Russia_EarlyMedieval_Heshui_Mohe_1	Guanzhuang	China_Miaozigou_MN	-0.0054	-0.433	1956	1977	38748
Mbuti	Laos_BA	Guanzhuang	China_Miaozigou_MN	-0.0045	-0.432	2758	2782	55446
Mbuti	Iranian	Guanzhuang	China_Miaozigou_MN	-0.0019	-0.425	8533	8566	176607
Mbuti	Orcadian	Guanzhuang	China_Miaozigou_MN	-0.002	-0.419	8603	8638	176596
Mbuti	She	Guanzhuang	China_Miaozigou_MN	-0.0015	-0.397	9312	9341	180822
Mbuti	Laos_LN_BA	Guanzhuang	China_Miaozigou_MN	-0.0028	-0.388	6800	6838	134468
Mbuti	Burusho	Guanzhuang	China_Miaozigou_MN	-0.0017	-0.379	8640	8670	176589
Mbuti	Han	Guanzhuang	China_Miaozigou_MN	-0.0016	-0.379	9093	9123	176613
Mbuti	Taiwan_Hanben_IA_lc	Guanzhuang	China_Miaozigou_MN	-0.0082	-0.358	570	580	11110
Mbuti	Kazakhstan_Nomad_IA	Guanzhuang	China_Miaozigou_MN	-0.0025	-0.352	6142	6173	124523
Mbuti	Taiwan_Gongguan	Guanzhuang	China_Miaozigou_MN	-0.003	-0.351	4910	4939	97191
Mbuti	Russia_AfontovaGora3	Guanzhuang	China_Miaozigou_MN	-0.0046	-0.333	1588	1603	34852
Mbuti	Nepal_Chokhopani_2800BP	Guanzhuang	China_Miaozigou_MN	-0.002	-0.327	9281	9320	180619
Mbuti	China_Lahu	Guanzhuang	China_Miaozigou_MN	-0.0014	-0.3	9008	9033	176595
Mbuti	Russia_Alan	Guanzhuang	China_Miaozigou_MN	-0.0014	-0.293	8755	8780	179706
Mbuti	Vietnam_historical	Guanzhuang	China_Miaozigou_MN	-0.0028	-0.241	2059	2070	40635
Mbuti	Italy_North_Villabruna_HG	Guanzhuang	China_Miaozigou_MN	-0.0018	-0.239	6327	6349	131165
Mbuti	Hungarian	Guanzhuang	China_Miaozigou_MN	-0.0011	-0.238	8610	8630	176597
Mbuti	USA_Anzick_realigned	Guanzhuang	China_Miaozigou_MN	-0.0015	-0.235	9113	9140	178943
Mbuti	Cambodian	Guanzhuang	China_Miaozigou_MN	-0.001	-0.218	8965	8984	176606
Mbuti	Taiwan_Hanben_IA	Guanzhuang	China_Miaozigou_MN	-0.0009	-0.209	9207	9223	179452
Mbuti	Pathan	Guanzhuang	China_Miaozigou_MN	-0.0009	-0.201	8583	8599	176608
Mbuti	Dungan	Guanzhuang	China_Miaozigou_MN	-0.0009	-0.186	9272	9290	180781
Mbuti	Russia_EBA_o1	Guanzhuang	China_Miaozigou_MN	-0.0024	-0.177	1696	1704	35326
Mbuti	Philippines_RedSlippedPottery	Guanzhuang	China_Miaozigou_MN	-0.0052	-0.128	169	170	3252
Mbuti	Mongolia_Bulgan_EarlyMedieval	Guanzhuang	China_Miaozigou_MN	-0.0008	-0.117	6787	6798	133019
Mbuti	Dushan	Guanzhuang	China_Miaozigou_MN	-0.001	-0.11	3942	3950	79967
Mbuti	Russia_MBA_Poltavka	Guanzhuang	China_Miaozigou_MN	-0.0006	-0.103	6842	6850	140982
Mbuti	Khonda_Dora	Guanzhuang	China_Miaozigou_MN	-0.0003	-0.055	8783	8788	176399
Mbuti	Mongolia_Xiongnu_o2	Guanzhuang	China_Miaozigou_MN	-0.0003	-0.046	8234	8239	166657
Mbuti	Russia_BA_Okunevo	Guanzhuang	China_Miaozigou_MN	-0.0002	-0.04	9022	9026	180775
Mbuti	Greece_Minoan_Lassithi	Guanzhuang	China_Miaozigou_MN	-0.0002	-0.035	7585	7588	157350
Mbuti	Jordanian	Guanzhuang	China_Miaozigou_MN	-0.0001	-0.027	8445	8447	176613
Mbuti	Makrani	Guanzhuang	China_Miaozigou_MN	-0.0001	-0.027	8523	8525	176594
Mbuti	Russia_Buryatia_Xiongnu_mother	Guanzhuang	China_Miaozigou_MN	-0.0001	-0.014	5639	5640	110841
Mbuti	Karitiana	Guanzhuang	China_Miaozigou_MN	-0.0001	-0.013	9005	9006	176611
Mbuti	LG	Guanzhuang	China_Miaozigou_MN	-0.0001	-0.01	8386	8387	162813
Mbuti	Tajik	Guanzhuang	China_Miaozigou_MN	0	-0.005	8634	8634	176603
Mbuti	Germany_CordedWare	Guanzhuang	China_Miaozigou_MN	0.0001	0.014	8541	8540	174889
Mbuti	Kazakhstan_Wusun	Guanzhuang	China_Miaozigou_MN	0.0001	0.014	8044	8043	164225
Mbuti	Russia_Chita_BA	Guanzhuang	China_Miaozigou_MN	0.0004	0.027	1359	1358	26492
Mbuti	Georgia_Satsurblia	Guanzhuang	China_Miaozigou_MN	0.0002	0.032	6361	6358	131433
Mbuti	LaCen	Guanzhuang	China_Miaozigou_MN	0.0002	0.034	6097	6094	120700
Mbuti	Vietnam_N_published	Guanzhuang	China_Miaozigou_MN	0.0013	0.065	690	688	13523
Mbuti	Kusunda	Guanzhuang	China_Miaozigou_MN	0.0004	0.083	8905	8898	176592
Mbuti	Mongolia_Sukhbaatar_MLBA	Guanzhuang	China_Miaozigou_MN	0.0007	0.084	4695	4688	92162
Mbuti	Russia_Siberia_Lena_EBA_o	Guanzhuang	China_Miaozigou_MN	0.002	0.084	511	509	10403
Mbuti	Vietnam_BA_DongSonCulture	Guanzhuang	China_Miaozigou_MN	0.001	0.106	3039	3033	63709
Mbuti	Quechua	Guanzhuang	China_Miaozigou_MN	0.0006	0.114	8982	8972	176603
Mbuti	Miao	Guanzhuang	China_Miaozigou_MN	0.0004	0.116	9319	9310	180821
Mbuti	Albanian	Guanzhuang	China_Miaozigou_MN	0.0007	0.125	8629	8617	176391
Mbuti	Georgian	Guanzhuang	China_Miaozigou_MN	0.0007	0.14	8545	8534	176606
Mbuti	BedouinB	Guanzhuang	China_Miaozigou_MN	0.0008	0.156	8440	8427	176589
Mbuti	Turkish	Guanzhuang	China_Miaozigou_MN	0.0007	0.159	8600	8587	176605
Mbuti	Russia_Samara_EBA_Yamnaya_published2	Guanzhuang	China_Miaozigou_MN	0.0012	0.174	8224	8205	169009
Mbuti	USA_Ancient_Beringian	Guanzhuang	China_Miaozigou_MN	0.0011	0.174	9170	9149	180804
Mbuti	Kazakhstan_Nomad_IA_o	Guanzhuang	China_Miaozigou_MN	0.002	0.181	2169	2161	45007
Mbuti	Armenian	Guanzhuang	China_Miaozigou_MN	0.0008	0.185	8554	8539	176597
Mbuti	Russia_KuengaRiver_N_1	Guanzhuang	China_Miaozigou_MN	0.0041	0.186	608	603	12281
Mbuti	Tonga_2700BP	Guanzhuang	China_Miaozigou_MN	0.0028	0.187	1291	1284	26537
Mbuti	Russia_Tuva_IA_AldyBel	Guanzhuang	China_Miaozigou_MN	0.0015	0.202	5954	5937	120558
Mbuti	Bulgaria_Varna_C	Guanzhuang	China_Miaozigou_MN	0.0021	0.205	2940	2928	61518
Mbuti	Druze	Guanzhuang	China_Miaozigou_MN	0.001	0.206	8532	8516	176593
Mbuti	Italy_Sicily_HG_OrienteC	Guanzhuang	China_Miaozigou_MN	0.0058	0.218	421	417	8599
Mbuti	Moldova_Cimmerian	Guanzhuang	China_Miaozigou_MN	0.0016	0.224	5987	5969	121186
Mbuti	Tujia	Guanzhuang	China_Miaozigou_MN	0.0009	0.235	9328	9312	180821
Mbuti	Mongolia_Selenge_XiongnuMedieval_o1	Guanzhuang	China_Miaozigou_MN	0.0029	0.243	2297	2283	45194
Mbuti	Israel_Natufian_published	Guanzhuang	China_Miaozigou_MN	0.0037	0.25	1272	1263	26354
Mbuti	Liangdao2	Guanzhuang	China_Miaozigou_MN	0.0018	0.25	6666	6642	132802
Mbuti	Kazakhstan_Kimak	Guanzhuang	China_Miaozigou_MN	0.0033	0.254	1681	1670	34410
Mbuti	Punjabi	Guanzhuang	China_Miaozigou_MN	0.0011	0.261	8666	8648	176615
Mbuti	Balochi	Guanzhuang	China_Miaozigou_MN	0.0013	0.276	8588	8566	176583
Mbuti	Estonian	Guanzhuang	China_Miaozigou_MN	0.0013	0.292	8658	8634	176604
Mbuti	Russia_Kalmykia_EBA_Yamnaya	Guanzhuang	China_Miaozigou_MN	0.0016	0.297	8327	8301	171201
Mbuti	China_SEastAsia_Island_EN	Guanzhuang	China_Miaozigou_MN	0.002	0.306	6851	6823	136524
Mbuti	Mansi	Guanzhuang	China_Miaozigou_MN	0.0014	0.314	8849	8824	176607
Mbuti	Chane	Guanzhuang	China_Miaozigou_MN	0.0018	0.325	8969	8936	176340
Mbuti	Papuan	Guanzhuang	China_Miaozigou_MN	0.0015	0.325	8699	8672	176615
Mbuti	Bulgaria_IA	Guanzhuang	China_Miaozigou_MN	0.0029	0.333	4373	4348	89971
Mbuti	Kyrgyzstan_Medieval_Nomad_o	Guanzhuang	China_Miaozigou_MN	0.003	0.336	3800	3777	75630
Mbuti	China_SEastAsia_Coastal_EN	Guanzhuang	China_Miaozigou_MN	0.0043	0.349	2083	2065	42285
Mbuti	Kashmiri_Pandit	Guanzhuang	China_Miaozigou_MN	0.0019	0.351	8621	8588	176226
Mbuti	Greece_Minoan_Odigitria	Guanzhuang	China_Miaozigou_MN	0.0045	0.358	1847	1831	38227
Mbuti	Turkmenistan_IA	Guanzhuang	China_Miaozigou_MN	0.0025	0.375	7348	7312	152386
Mbuti	Kazakhstan_Karakhanid	Guanzhuang	China_Miaozigou_MN	0.0029	0.376	5016	4988	100371
Mbuti	Relli_1	Guanzhuang	China_Miaozigou_MN	0.002	0.383	8711	8676	176435
Mbuti	China_Wuzhuangguoliang_LN	Guanzhuang	China_Miaozigou_MN	0.0091	0.396	381	374	7691
Mbuti	Russia_Abkhasian	Guanzhuang	China_Miaozigou_MN	0.0019	0.396	8596	8563	176600
Mbuti	GaoHuaHua	Guanzhuang	China_Miaozigou_MN	0.0024	0.4	7679	7642	150081
Mbuti	Russia_Potapovka	Guanzhuang	China_Miaozigou_MN	0.0071	0.407	1127	1111	23112
Mbuti	Samaritan	Guanzhuang	China_Miaozigou_MN	0.0023	0.418	8488	8449	175610
Mbuti	Chukchi	Guanzhuang	China_Miaozigou_MN	0.0022	0.419	8837	8799	176404
Mbuti	Icelandic	Guanzhuang	China_Miaozigou_MN	0.0019	0.42	8635	8601	176601
Mbuti	Vietnam_N	Guanzhuang	China_Miaozigou_MN	0.0055	0.425	1680	1662	33301
Mbuti	Turkey_EBA_II	Guanzhuang	China_Miaozigou_MN	0.0025	0.432	7733	7693	161125
Mbuti	Turkey_MLBA_AssyrianColonyPeriod	Guanzhuang	China_Miaozigou_MN	0.0031	0.438	5714	5678	118292
Mbuti	Cretan	Guanzhuang	China_Miaozigou_MN	0.002	0.441	8575	8540	176590
Mbuti	Japan_Jomon	Guanzhuang	China_Miaozigou_MN	0.0031	0.442	7264	7220	143723
Mbuti	China_Xinjian_IA	Guanzhuang	China_Miaozigou_MN	0.0029	0.444	6441	6404	128319
Mbuti	Iran_C_SehGabi	Guanzhuang	China_Miaozigou_MN	0.0023	0.45	7706	7670	159163
Mbuti	Russia_HG_Karelia	Guanzhuang	China_Miaozigou_MN	0.0031	0.469	7728	7680	158399
Mbuti	Lemande	Guanzhuang	China_Miaozigou_MN	0.0019	0.475	7069	7042	176598
Mbuti	Georgia_Kotias	Guanzhuang	China_Miaozigou_MN	0.003	0.479	8789	8737	180725
Mbuti	Cree1	Guanzhuang	China_Miaozigou_MN	0.0027	0.492	8861	8814	176266
Mbuti	Kazakhstan_Wusun_LateSaka_dup	Guanzhuang	China_Miaozigou_MN	0.0062	0.496	1881	1857	37909
Mbuti	Vietnam_N_all_published	Guanzhuang	China_Miaozigou_MN	0.0097	0.508	835	819	16301
Mbuti	Australian	Guanzhuang	China_Miaozigou_MN	0.0025	0.509	8702	8659	176569
Mbuti	Mexico_Zapotec	Guanzhuang	China_Miaozigou_MN	0.0025	0.516	8979	8934	176592
Mbuti	Igbo	Guanzhuang	China_Miaozigou_MN	0.002	0.525	7075	7046	176603
Mbuti	Russia_Afanasievo	Guanzhuang	China_Miaozigou_MN	0.0026	0.533	8865	8819	180033
Mbuti	Lezgin	Guanzhuang	China_Miaozigou_MN	0.0024	0.539	8627	8585	176609
Mbuti	Qihe3	Guanzhuang	China_Miaozigou_MN	0.0044	0.541	4768	4726	95107
Mbuti	Kazakhstan_GoldenHordeAsian	Guanzhuang	China_Miaozigou_MN	0.0036	0.546	8777	8715	171401
Mbuti	Kazakhstan_Turk	Guanzhuang	China_Miaozigou_MN	0.0033	0.549	8158	8105	164245
Mbuti	Canada_MDorset_published	Guanzhuang	China_Miaozigou_MN	0.011	0.556	824	806	15974
Mbuti	Czech	Guanzhuang	China_Miaozigou_MN	0.003	0.56	8652	8599	176260
Mbuti	Hazara	Guanzhuang	China_Miaozigou_MN	0.0025	0.562	8843	8799	176587
Mbuti	Daur	Guanzhuang	China_Miaozigou_MN	0.0032	0.582	9084	9027	176167
Mbuti	Mongolia_Khentii_Xiongnu_daughter	Guanzhuang	China_Miaozigou_MN	0.005	0.593	4841	4793	93954
Mbuti	Russia_NorthOssetian	Guanzhuang	China_Miaozigou_MN	0.0029	0.602	8652	8602	176605
Mbuti	Altaian	Guanzhuang	China_Miaozigou_MN	0.0033	0.606	8965	8906	176302
Mbuti	Mongolia_Arkhangai_XiongnuEarlyMedieval_1	Guanzhuang	China_Miaozigou_MN	0.0042	0.607	6809	6752	140332
Mbuti	Bulgaria_C	Guanzhuang	China_Miaozigou_MN	0.003	0.615	7758	7712	159666
Mbuti	Spain_MLN	Guanzhuang	China_Miaozigou_MN	0.0026	0.621	8540	8495	175354
Mbuti	Russia_UstIda_LN	Guanzhuang	China_Miaozigou_MN	0.0035	0.638	8532	8472	167234
Mbuti	Kazakhstan_Kumsay_EBA	Guanzhuang	China_Miaozigou_MN	0.0036	0.645	7160	7109	145721
Mbuti	Mongolia_Bulgan_Xiongnu	Guanzhuang	China_Miaozigou_MN	0.0038	0.658	7820	7762	153409
Mbuti	Kazakhstan_Central_Saka	Guanzhuang	China_Miaozigou_MN	0.0034	0.666	8709	8650	173871
Mbuti	Sweden_Motala_HG	Guanzhuang	China_Miaozigou_MN	0.0037	0.672	7945	7886	162713
Mbuti	Mongolia_Arkhangai_MLBAtoEIAorMedieval_o	Guanzhuang	China_Miaozigou_MN	0.0093	0.677	1531	1503	29987
Mbuti	Mixe	Guanzhuang	China_Miaozigou_MN	0.0032	0.679	9001	8944	176610
Mbuti	China_SEastAsia_Coastal_Historic	Guanzhuang	China_Miaozigou_MN	0.0085	0.68	2104	2068	42253
Mbuti	Russia_Andronovo	Guanzhuang	China_Miaozigou_MN	0.0035	0.684	8760	8699	179297
Mbuti	JXNT	Guanzhuang	China_Miaozigou_MN	0.0039	0.689	8541	8475	164807
Mbuti	Longlin	Guanzhuang	China_Miaozigou_MN	0.015658	0.701	1262	1235	25808
Mbuti	China_AR_IA	Guanzhuang	China_Miaozigou_MN	0.0181	0.703	453	437	8973
Mbuti	Finnish	Guanzhuang	China_Miaozigou_MN	0.0031	0.705	8689	8635	176610
Mbuti	Kazakhstan_Kipchak1	Guanzhuang	China_Miaozigou_MN	0.0054	0.706	6032	5967	123083
Mbuti	Mbuti	Guanzhuang	China_Miaozigou_MN	0.0048	0.706	5385	5334	106850
Mbuti	Estonia_CordedWare	Guanzhuang	China_Miaozigou_MN	0.0041	0.707	7863	7799	161550
Mbuti	Irula	Guanzhuang	China_Miaozigou_MN	0.0031	0.707	8674	8620	176604
Mbuti	Russia_Srubnaya	Guanzhuang	China_Miaozigou_MN	0.0032	0.71	8676	8620	176842
Mbuti	Russia_KuengaRiver_N_2	Guanzhuang	China_Miaozigou_MN	0.0047	0.711	8425	8347	161535
Mbuti	Iran_GanjDareh_N	Guanzhuang	China_Miaozigou_MN	0.0035	0.714	7925	7869	164761
Mbuti	Polish	Guanzhuang	China_Miaozigou_MN	0.0039	0.728	8622	8555	176259
Mbuti	Russia_KolymaRiver_LN_1d	Guanzhuang	China_Miaozigou_MN	0.0075	0.734	3429	3377	66507
Mbuti	China_SEastAsia_Island_LN	Guanzhuang	China_Miaozigou_MN	0.0197	0.738	417	401	8362
Mbuti	Suogang	Guanzhuang	China_Miaozigou_MN	0.0197	0.738	417	401	8362
Mbuti	Xibo	Guanzhuang	China_Miaozigou_MN	0.0028	0.754	9332	9279	180822
Mbuti	Naxi	Guanzhuang	China_Miaozigou_MN	0.0032	0.758	9127	9069	176615
Mbuti	Russia_CentralYakutia_LN	Guanzhuang	China_Miaozigou_MN	0.0048	0.764	9075	8989	175648
Mbuti	Armenia_LBA	Guanzhuang	China_Miaozigou_MN	0.0067	0.772	3680	3631	77352
Mbuti	Adygei	Guanzhuang	China_Miaozigou_MN	0.0037	0.773	8659	8595	176598
Mbuti	Surui	Guanzhuang	China_Miaozigou_MN	0.004	0.775	9055	8984	176593
Mbuti	Russia_LBA_1	Guanzhuang	China_Miaozigou_MN	0.019	0.793	520	501	10443
Mbuti	Mongola	Guanzhuang	China_Miaozigou_MN	0.0031	0.794	9339	9282	180820
Mbuti	Brahui	Guanzhuang	China_Miaozigou_MN	0.0036	0.795	8589	8528	176591
Mbuti	Turkmenistan_Gonur_BA_1	Guanzhuang	China_Miaozigou_MN	0.0043	0.795	6986	6926	144077
Mbuti	Uyghur	Guanzhuang	China_Miaozigou_MN	0.0035	0.799	8854	8791	176603
Mbuti	Mongolia_Xiongnu_o1	Guanzhuang	China_Miaozigou_MN	0.004	0.802	9312	9238	180715
Mbuti	Russia_MLBA_Sintashta	Guanzhuang	China_Miaozigou_MN	0.0034	0.805	8745	8686	177890
Mbuti	Yadava	Guanzhuang	China_Miaozigou_MN	0.0037	0.805	8713	8648	176596
Mbuti	Burmese	Guanzhuang	China_Miaozigou_MN	0.0037	0.809	9025	8960	176605
Mbuti	Kazakhstan_Kangju_o1	Guanzhuang	China_Miaozigou_MN	0.0057	0.815	5706	5641	116841
Mbuti	Kazakhstan_Botai_Eneolithic	Guanzhuang	China_Miaozigou_MN	0.0053	0.827	6947	6875	139691
Mbuti	Mongolia_Selenge_Xiongnu	Guanzhuang	China_Miaozigou_MN	0.0056	0.83	7151	7071	138543
Mbuti	Tibetan	Guanzhuang	China_Miaozigou_MN	0.0038	0.839	9068	8999	176601
Mbuti	Mongolia_EBA_Chemurchek_2	Guanzhuang	China_Miaozigou_MN	0.0056	0.894	6790	6715	138163
Mbuti	Russia_AfontovaGora2	Guanzhuang	China_Miaozigou_MN	0.0217	0.9	533	510	10739
Mbuti	China_WLR_BA	Guanzhuang	China_Miaozigou_MN	0.0073	0.921	5020	4947	97758
Mbuti	Piapoco	Guanzhuang	China_Miaozigou_MN	0.0047	0.93	9060	8976	176586
Mbuti	Germany_BellBeaker	Guanzhuang	China_Miaozigou_MN	0.0039	0.935	8703	8635	177583
Mbuti	Mayan	Guanzhuang	China_Miaozigou_MN	0.0047	0.957	9043	8959	176577
Mbuti	Kazakhstan_IA_Saka_dup	Guanzhuang	China_Miaozigou_MN	0.0158	0.976	1189	1152	23891
Mbuti	Spain_C	Guanzhuang	China_Miaozigou_MN	0.0042	0.979	8638	8566	176552
Mbuti	China_AR_Xianbei_IA	Guanzhuang	China_Miaozigou_MN	0.0112	0.996	2344	2292	45058
Mbuti	Mongolia_Arkhangai_XiongnuEarlyMedieval_3	Guanzhuang	China_Miaozigou_MN	0.0045	1.008	9000	8919	177571
Mbuti	Eskimo_Chaplin	Guanzhuang	China_Miaozigou_MN	0.0059	1.042	9081	8975	176432
Mbuti	Russia_Karasuk_oRISE	Guanzhuang	China_Miaozigou_MN	0.0047	1.048	8963	8878	180513
Mbuti	Yi	Guanzhuang	China_Miaozigou_MN	0.0051	1.097	9156	9063	176598
Mbuti	Russia_Samara_EBA_Yamnaya	Guanzhuang	China_Miaozigou_MN	0.0054	1.115	8452	8361	172434
Mbuti	Russia_Mezhovskaya	Guanzhuang	China_Miaozigou_MN	0.0068	1.119	7960	7853	162366
Mbuti	Mongolia_Tuv_Xiongnu	Guanzhuang	China_Miaozigou_MN	0.0071	1.121	8005	7892	155619
Mbuti	Japanese	Guanzhuang	China_Miaozigou_MN	0.0047	1.122	9120	9035	176611
Mbuti	Russia_CentralYakutia_IA	Guanzhuang	China_Miaozigou_MN	0.0234	1.123	644	614	11992
Mbuti	Nepal_Samdzong_1500BP	Guanzhuang	China_Miaozigou_MN	0.0053	1.13	9312	9215	180734
Mbuti	Yiyang	Guanzhuang	China_Miaozigou_MN	0.015	1.146	1872	1816	37340
Mbuti	China_HMMH_MN	Guanzhuang	China_Miaozigou_MN	0.0083	1.15	6007	5909	115888
Mbuti	Tubalar	Guanzhuang	China_Miaozigou_MN	0.0052	1.153	8940	8847	176609
Mbuti	Canada_LateDorset	Guanzhuang	China_Miaozigou_MN	0.0131	1.154	2299	2239	44545
Mbuti	Aleut	Guanzhuang	China_Miaozigou_MN	0.0058	1.173	8929	8826	176605
Mbuti	Kyrgyzstan_TianShan_Hun	Guanzhuang	China_Miaozigou_MN	0.0047	1.174	9003	8919	180803
Mbuti	Jordan_EBA	Guanzhuang	China_Miaozigou_MN	0.0074	1.177	6173	6082	127585
Mbuti	Moldova_Glinoe_Scythian	Guanzhuang	China_Miaozigou_MN	0.0061	1.183	8432	8329	172084
Mbuti	Nepal_Mebrak_2125BP	Guanzhuang	China_Miaozigou_MN	0.0085	1.186	6054	5952	117148
Mbuti	Boshan	Guanzhuang	China_Miaozigou_MN	0.0081	1.188	7569	7446	147423
Mbuti	Mongolia_Dornod_PreBronze	Guanzhuang	China_Miaozigou_MN	0.0178	1.2	1435	1385	28367
Mbuti	Kurumba	Guanzhuang	China_Miaozigou_MN	0.0065	1.213	8658	8546	175514
Mbuti	Nahua	Guanzhuang	China_Miaozigou_MN	0.0068	1.22	9013	8890	176414
Mbuti	Russia_Blagovechensk_IA	Guanzhuang	China_Miaozigou_MN	0.0115	1.236	3792	3705	73492
Mbuti	Kazakhstan_Karluk_1	Guanzhuang	China_Miaozigou_MN	0.008	1.251	8495	8360	168336
Mbuti	Mongolia_Sukhbaatar_MLBAXiongnuLatEMedieval_sister	Guanzhuang	China_Miaozigou_MN	0.0323	1.277	503	472	9630
Mbuti	Mongolia_LBA_CenterWest_4_o	Guanzhuang	China_Miaozigou_MN	0.0099	1.283	6069	5949	118511
Mbuti	Mongolia_Khentii_EIA_SlabGrave	Guanzhuang	China_Miaozigou_MN	0.0223	1.305	1028	983	20016
Mbuti	Russia_IA_2	Guanzhuang	China_Miaozigou_MN	0.0095	1.325	6578	6454	130499
Mbuti	Russia_SaltovoMayaki	Guanzhuang	China_Miaozigou_MN	0.0265	1.346	688	652	14749
Mbuti	Kazakhstan_Nomad_Hun_Sarmatian	Guanzhuang	China_Miaozigou_MN	0.0086	1.368	7945	7811	154760
Mbuti	Russia_IA_Yankovsky	Guanzhuang	China_Miaozigou_MN	0.0115	1.369	4963	4851	95709
Mbuti	China_YR_LBIA	Guanzhuang	China_Miaozigou_MN	0.0063	1.386	9319	9202	179483
Mbuti	China_AR_EN	Guanzhuang	China_Miaozigou_MN	0.0147	1.388	2935	2850	57101
Mbuti	Oroqen	Guanzhuang	China_Miaozigou_MN	0.0065	1.425	9167	9049	176600
Mbuti	China_Upper_YR_IA	Guanzhuang	China_Miaozigou_MN	0.0073	1.44	8959	8829	173289
Mbuti	Eskimo_Sireniki	Guanzhuang	China_Miaozigou_MN	0.0071	1.455	9099	8971	176609
Mbuti	Russia_AginBuryat_N	Guanzhuang	China_Miaozigou_MN	0.0137	1.463	3264	3175	61467
Mbuti	Germany_EN_LBK	Guanzhuang	China_Miaozigou_MN	0.0067	1.47	8655	8541	176946
Mbuti	Tu	Guanzhuang	China_Miaozigou_MN	0.0055	1.471	9329	9227	180820
Mbuti	Russia_UstIda_EBA	Guanzhuang	China_Miaozigou_MN	0.0094	1.492	7023	6892	136886
Mbuti	Kazakhstan_ZevakinoChilikta_IA_2	Guanzhuang	China_Miaozigou_MN	0.0164	1.512	2380	2303	47454
Mbuti	Mongolia_Tuv_LatEMedieval	Guanzhuang	China_Miaozigou_MN	0.0082	1.523	7859	7731	152563
Mbuti	Poland_Globular_Amphora_published	Guanzhuang	China_Miaozigou_MN	0.0367	1.528	533	495	10796
Mbuti	Turkey_N	Guanzhuang	China_Miaozigou_MN	0.0067	1.529	8717	8601	178295
Mbuti	Russia_Buryatia_PreBronze	Guanzhuang	China_Miaozigou_MN	0.0107	1.552	6616	6475	127791
Mbuti	China_YR_MN	Guanzhuang	China_Miaozigou_MN	0.0078	1.588	9379	9234	179742
Mbuti	Russia_AngaraRiver_EN	Guanzhuang	China_Miaozigou_MN	0.0105	1.645	8818	8636	171118
Mbuti	Russia_IA_EarlySarmatian	Guanzhuang	China_Miaozigou_MN	0.0116	1.646	5560	5433	112743
Mbuti	Mongolia_EIA_8	Guanzhuang	China_Miaozigou_MN	0.0121	1.655	5961	5818	115416
Mbuti	Armenia_EBA	Guanzhuang	China_Miaozigou_MN	0.0088	1.666	7605	7473	156061
Mbuti	Kazakhstan_TianShan_Saka	Guanzhuang	China_Miaozigou_MN	0.0362	1.682	603	561	12132
Mbuti	Mongolia_Uvurkhangai_EIALatEMedieval	Guanzhuang	China_Miaozigou_MN	0.0099	1.711	7763	7611	151313
Mbuti	Mongolia_Chalcolithic_Afanasievo_1	Guanzhuang	China_Miaozigou_MN	0.0133	1.72	5611	5464	113748
Mbuti	Jordan_PPNB_published	Guanzhuang	China_Miaozigou_MN	0.0274	1.721	1071	1014	22017
Mbuti	Chipewyan	Guanzhuang	China_Miaozigou_MN	0.0084	1.74	9047	8897	176605
Mbuti	Armenia_C	Guanzhuang	China_Miaozigou_MN	0.0092	1.743	7835	7692	160331
Mbuti	China_AmurRiver_EarlyN	Guanzhuang	China_Miaozigou_MN	0.013	1.743	5619	5475	109462
Mbuti	Mongolia_Tuv_EIA	Guanzhuang	China_Miaozigou_MN	0.0153	1.758	4550	4413	87332
Mbuti	Yakut	Guanzhuang	China_Miaozigou_MN	0.0068	1.764	9328	9203	180824
Mbuti	Russia_LenaRiver_EN	Guanzhuang	China_Miaozigou_MN	0.0121	1.808	7927	7737	151896
Mbuti	China_WLR_BA_o	Guanzhuang	China_Miaozigou_MN	0.0139	1.828	6492	6314	125041
Mbuti	Kazakhstan_Central_Steppe_EMBA	Guanzhuang	China_Miaozigou_MN	0.0095	1.832	9175	9003	180766
Mbuti	Mongolia_LBA_Ulaanzukh_2_dup	Guanzhuang	China_Miaozigou_MN	0.0136	1.845	6618	6441	127722
Mbuti	Ulchi	Guanzhuang	China_Miaozigou_MN	0.0088	1.856	9152	8992	176597
Mbuti	China_Upper_YR_LN	Guanzhuang	China_Miaozigou_MN	0.0086	1.861	9358	9198	179320
Mbuti	Mongolia_Umungobi_LatEMedieval	Guanzhuang	China_Miaozigou_MN	0.0091	1.861	8538	8383	166663
Mbuti	China_YR_LN	Guanzhuang	China_Miaozigou_MN	0.0078	1.87	9411	9265	180632
Mbuti	Russia_DevilsCave_N	Guanzhuang	China_Miaozigou_MN	0.0096	1.87	9399	9221	180781
Mbuti	Kazakhstan_IA_Berel_Pazyryk	Guanzhuang	China_Miaozigou_MN	0.0108	1.88	8282	8105	163153
Mbuti	China_AmurRiver_LPaleolithic	Guanzhuang	China_Miaozigou_MN	0.0119	1.899	6630	6474	129816
Mbuti	Hezhen	Guanzhuang	China_Miaozigou_MN	0.0089	1.914	9137	8976	176602
Mbuti	Mongolia_Khovd_MLBAXiongnuLatEMedieval	Guanzhuang	China_Miaozigou_MN	0.0158	1.945	4175	4046	80228
Mbuti	Buryat	Guanzhuang	China_Miaozigou_MN	0.0085	1.949	9309	9152	180819
Mbuti	Mongolia_Arkhangai_Xiongnu_o	Guanzhuang	China_Miaozigou_MN	0.0129	1.952	7626	7432	147300
Mbuti	Spain_EN	Guanzhuang	China_Miaozigou_MN	0.0098	1.958	8046	7890	165064
Mbuti	Sherpa	Guanzhuang	China_Miaozigou_MN	0.0091	1.978	9169	9004	176602
Mbuti	China_AmurRiver_BA	Guanzhuang	China_Miaozigou_MN	0.0929	1.998	152	126	2685
Mbuti	Mongolia_Arkhangai_PreBronze	Guanzhuang	China_Miaozigou_MN	0.0147	2	6092	5915	117904
Mbuti	Koryak	Guanzhuang	China_Miaozigou_MN	0.0111	2.048	9351	9145	180815
Mbuti	Mongolia_Khentii_LatEMedieval	Guanzhuang	China_Miaozigou_MN	0.0121	2.068	7782	7596	150681
Mbuti	Mongolia_Arkhangai_XiongnuEarlyMedieval_2	Guanzhuang	China_Miaozigou_MN	0.0128	2.069	6485	6320	131677
Mbuti	Turkmenistan_C_Namazga_1d	Guanzhuang	China_Miaozigou_MN	0.0622	2.077	322	284	6448
Mbuti	Russia_Shamanka_EBA	Guanzhuang	China_Miaozigou_MN	0.012	2.08	8562	8360	166198
Mbuti	Israel_C	Guanzhuang	China_Miaozigou_MN	0.0102	2.095	8031	7869	165086
Mbuti	Mongolia_EBA_Ulgii_1_dup	Guanzhuang	China_Miaozigou_MN	0.0148	2.117	7707	7482	150030
Mbuti	Russia_KolymaRiver_LN	Guanzhuang	China_Miaozigou_MN	0.0113	2.144	9372	9164	180799
Mbuti	Mongolia_Ulaanbaatar_EIALatEMedieval	Guanzhuang	China_Miaozigou_MN	0.02	2.16	3951	3796	76455
Mbuti	Mongolia_EIA_Xiongnu_7	Guanzhuang	China_Miaozigou_MN	0.0158	2.161	5909	5724	114227
Mbuti	China_Shimao_LN	Guanzhuang	China_Miaozigou_MN	0.0115	2.167	9323	9111	178827
Mbuti	Eskimo_Naukan	Guanzhuang	China_Miaozigou_MN	0.0106	2.18	9120	8928	176600
Mbuti	Mongolia_Dundgobi_LatEMedieval	Guanzhuang	China_Miaozigou_MN	0.0155	2.238	6417	6222	124776
Mbuti	Russia_Buryatia_Xiongnu	Guanzhuang	China_Miaozigou_MN	0.0114	2.263	8677	8482	167663
Mbuti	Russia_Siberia_UP	Guanzhuang	China_Miaozigou_MN	0.0198	2.263	4609	4430	90342
Mbuti	Russia_Siberia_Tenisei_EBA	Guanzhuang	China_Miaozigou_MN	0.0169	2.271	5980	5782	117131
Mbuti	Shandong_EN	Guanzhuang	China_Miaozigou_MN	0.0126	2.297	7554	7366	146133
Mbuti	Russia_Lokomotiv_Eneolithic	Guanzhuang	China_Miaozigou_MN	0.0134	2.331	8339	8120	160660
Mbuti	Russia_Kurma_EBA	Guanzhuang	China_Miaozigou_MN	0.0168	2.363	5626	5440	110099
Mbuti	Kazakhstan_Korgantas_IA	Guanzhuang	China_Miaozigou_MN	0.0168	2.369	7187	6949	138332
Mbuti	Mongolia_Dornod_Xiongnu	Guanzhuang	China_Miaozigou_MN	0.017	2.449	7520	7269	144654
Mbuti	China_AmurRiver_N	Guanzhuang	China_Miaozigou_MN	0.0149	2.456	6434	6245	125156
Mbuti	Pakistan_Loebanr_IA	Guanzhuang	China_Miaozigou_MN	0.01	2.496	8634	8463	175181
Mbuti	Mongolia_Khentii_Xiongnu	Guanzhuang	China_Miaozigou_MN	0.018	2.532	7210	6955	138483
Mbuti	Mongolia_Dornod_LatEMedieval	Guanzhuang	China_Miaozigou_MN	0.0119	2.555	8948	8739	173479
Mbuti	China_WLR_LN	Guanzhuang	China_Miaozigou_MN	0.0158	2.556	7720	7480	148107
Mbuti	Mongolia_Sukhbaatar_LatEMedieval	Guanzhuang	China_Miaozigou_MN	0.0107	2.557	9292	9095	179240
Mbuti	Mongolia_Khovd_MLBAEarlyMedieval	Guanzhuang	China_Miaozigou_MN	0.0149	2.623	8102	7864	160522
Mbuti	Mongolia_Khuvsgul_XiongnuLatEMedieval_1	Guanzhuang	China_Miaozigou_MN	0.0139	2.65	8287	8059	164413
Mbuti	Russia_Krasnoyarsk_BA	Guanzhuang	China_Miaozigou_MN	0.0165	2.671	9416	9111	180743
Mbuti	Mongolia_East_N	Guanzhuang	China_Miaozigou_MN	0.0154	2.677	7836	7598	150767
Mbuti	China_WLR_MN	Guanzhuang	China_Miaozigou_MN	0.0151	2.684	9426	9145	179524
Mbuti	Mongolia_Sukhbaatar_MLBAXiongnuLatEMedieval	Guanzhuang	China_Miaozigou_MN	0.0116	2.773	9162	8952	176644
Mbuti	Russia_Siberia_Irkutsk_EBA	Guanzhuang	China_Miaozigou_MN	0.0164	2.78	7740	7491	148685
Mbuti	Mongolia_Arkhangai_EarlyMedieval	Guanzhuang	China_Miaozigou_MN	0.0123	2.781	8837	8623	177590
Mbuti	Kazakhstan_Berel_IA_o3	Guanzhuang	China_Miaozigou_MN	0.0132	2.795	8979	8744	173133
Mbuti	Mongolia_Uvurkhangai_Xiongnu	Guanzhuang	China_Miaozigou_MN	0.0161	2.813	8200	7939	156806
Mbuti	Russia_KadalinkaRiver_N	Guanzhuang	China_Miaozigou_MN	0.0179	2.824	8918	8604	169006
Mbuti	Mongolia_Chalcolithic_Afanasievo_2	Guanzhuang	China_Miaozigou_MN	0.0231	2.899	5458	5211	105269
Mbuti	Mongolia_IA_Xianbei	Guanzhuang	China_Miaozigou_MN	0.0234	2.977	6167	5885	118603
Mbuti	Mongolia_Uvs_EIAXiongnuLateMedival	Guanzhuang	China_Miaozigou_MN	0.0133	2.989	8801	8571	174825
Mbuti	Russia_Shamanka_Eneolithic	Guanzhuang	China_Miaozigou_MN	0.0127	3.003	9402	9167	180810
Mbuti	Even	Guanzhuang	China_Miaozigou_MN	0.0138	3.037	9164	8915	176604
Mbuti	Russia_MN_Boisman	Guanzhuang	China_Miaozigou_MN	0.0151	3.095	8044	7805	155134
Mbuti	Russia_UstBelaya_Angara	Guanzhuang	China_Miaozigou_MN	0.0146	3.199	8864	8609	171217
Mbuti	Mongolia_LBA_Ulaanzukh_2	Guanzhuang	China_Miaozigou_MN	0.0191	3.261	7119	6852	137185
Mbuti	China_AmurRiver_Mesolithic	Guanzhuang	China_Miaozigou_MN	0.024	3.321	5149	4908	99279
Mbuti	Mongolia_EIA_SlabGrave_1	Guanzhuang	China_Miaozigou_MN	0.0139	3.328	9069	8820	173888
Mbuti	Mongolia_Bulgan_EarlyMedievalLatEMedieval	Guanzhuang	China_Miaozigou_MN	0.0155	3.393	9004	8730	173614
Mbuti	Greenland_Saqqaq	Guanzhuang	China_Miaozigou_MN	0.0225	3.443	8635	8256	165987
Mbuti	Russia_ArgunRiver_M	Guanzhuang	China_Miaozigou_MN	0.0215	3.475	9317	8925	177737
Mbuti	Mongolia_Khuvsgul_XiongnuLatEMedieval_2	Guanzhuang	China_Miaozigou_MN	0.0171	3.555	8764	8469	169231
Mbuti	China_NEastAsia_Inland_EN	Guanzhuang	China_Miaozigou_MN	0.0323	4.254	6438	6035	123746
Mbuti	Mongolia_North_N	Guanzhuang	China_Miaozigou_MN	0.0227	4.565	8599	8217	164832

## Sheet: E
Table S2E. f4(Mbuti, Reference; X, Guanzhuang) to evaluate the genetic divergence between the Guanzhuang population and population X. The 'Reference' group consists of 287 ancient and contemporary populations, while population X includes ancient populations from various regions of East Asia. |Z|>3 indicates the significant values, highlighted in Datas by blue (positive) and red (negative) ; 2<|Z|…
f4(Mbuti, Reference; Guanzhuang, China_Shimao_LN)
pop1	pop2	pop3	pop4	f4	Z	ABAB	ABBA	SNPs
Mbuti	JPT	Guanzhuang	China_Shimao_LN	-0.0116	-4.942	33547	34333	646183
Mbuti	CDX	Guanzhuang	China_Shimao_LN	-0.0101	-4.243	33435	34118	646183
Mbuti	KHV	Guanzhuang	China_Shimao_LN	-0.0099	-4.199	33438	34105	646183
Mbuti	Malaysia_historical	Guanzhuang	China_Shimao_LN	-0.0201	-4.169	13965	14539	275668
Mbuti	Atayal	Guanzhuang	China_Shimao_LN	-0.0156	-4.135	32225	33244	627097
Mbuti	CHS	Guanzhuang	China_Shimao_LN	-0.0097	-4.115	33584	34241	646183
Mbuti	Taiwan_Liangdao_LatePaleolithic	Guanzhuang	China_Shimao_LN	-0.0292	-3.822	4476	4746	84078
Mbuti	Kinh	Guanzhuang	China_Shimao_LN	-0.0117	-3.788	32374	33139	628150
Mbuti	Dai	Guanzhuang	China_Shimao_LN	-0.0103	-3.767	33407	34099	646179
Mbuti	Kazakhstan_Nomad_IA_o	Guanzhuang	China_Shimao_LN	-0.0211	-3.506	7726	8059	160381
Mbuti	Dusun	Guanzhuang	China_Shimao_LN	-0.0105	-3.336	32281	32963	628142
Mbuti	CHB	Guanzhuang	China_Shimao_LN	-0.0075	-3.238	33679	34190	646183
Mbuti	Shenxian	Guanzhuang	China_Shimao_LN	-0.0156	-3.192	14885	15356	299559
Mbuti	Ami	Guanzhuang	China_Shimao_LN	-0.01	-3.111	32493	33150	628174
Mbuti	Lebanon_MBA	Guanzhuang	China_Shimao_LN	-0.0087	-3.085	31272	31823	640169
Mbuti	Taiwan_Hanben_IA	Guanzhuang	China_Shimao_LN	-0.008	-3.044	32999	33534	636835
Mbuti	Cretan	Guanzhuang	China_Shimao_LN	-0.0088	-3.027	30651	31197	628158
Mbuti	Hawaiian	Guanzhuang	China_Shimao_LN	-0.0108	-3.027	32071	32773	626252
Mbuti	Indonesia_LN_BA_IA	Guanzhuang	China_Shimao_LN	-0.0273	-2.958	2831	2990	57989
Mbuti	Qihe3	Guanzhuang	China_Shimao_LN	-0.0138	-2.926	15569	16005	313492
Mbuti	China_Lahu	Guanzhuang	China_Shimao_LN	-0.0091	-2.852	32402	32995	628171
Mbuti	Russian	Guanzhuang	China_Shimao_LN	-0.008	-2.769	31020	31518	628211
Mbuti	Madiga	Guanzhuang	China_Shimao_LN	-0.0078	-2.752	31098	31588	628198
Mbuti	China_SEastAsia_Coastal_LN	Guanzhuang	China_Shimao_LN	-0.0109	-2.711	15190	15524	303788
Mbuti	GaoHuaHua	Guanzhuang	China_Shimao_LN	-0.0093	-2.665	26573	27071	516967
Mbuti	Bulgarian	Guanzhuang	China_Shimao_LN	-0.0076	-2.651	30711	31182	628103
Mbuti	Cambodian	Guanzhuang	China_Shimao_LN	-0.0081	-2.629	32168	32695	628191
Mbuti	Tanshishan	Guanzhuang	China_Shimao_LN	-0.0142	-2.586	8362	8603	168733
Mbuti	Vietnam_LN	Guanzhuang	China_Shimao_LN	-0.0135	-2.584	10453	10739	210769
Mbuti	Tonga_2700BP	Guanzhuang	China_Shimao_LN	-0.0208	-2.562	4017	4188	81166
Mbuti	Xitoucun	Guanzhuang	China_Shimao_LN	-0.0118	-2.533	12356	12651	248933
Mbuti	Tonga_2500BP	Guanzhuang	China_Shimao_LN	-0.0175	-2.423	5421	5614	108135
Mbuti	Vietnam_BA_DongSonCulture	Guanzhuang	China_Shimao_LN	-0.0118	-2.393	10615	10868	221487
Mbuti	Bengali	Guanzhuang	China_Shimao_LN	-0.0067	-2.39	31205	31626	628174
Mbuti	Finnish	Guanzhuang	China_Shimao_LN	-0.0066	-2.376	31069	31482	628235
Mbuti	Nepal_Chokhopani_2800BP	Guanzhuang	China_Shimao_LN	-0.0094	-2.334	33426	34058	645361
Mbuti	Sardinian	Guanzhuang	China_Shimao_LN	-0.0066	-2.31	30782	31192	628232
Mbuti	Mongolia_Xiongnu_o2	Guanzhuang	China_Shimao_LN	-0.0081	-2.279	29447	29926	592841
Mbuti	Germany_EBA_Unetice	Guanzhuang	China_Shimao_LN	-0.0068	-2.223	27810	28189	568089
Mbuti	Jordanian	Guanzhuang	China_Shimao_LN	-0.006	-2.223	30376	30740	628236
Mbuti	Turkmenistan_IA	Guanzhuang	China_Shimao_LN	-0.0087	-2.211	26322	26783	540523
Mbuti	Basque	Guanzhuang	China_Shimao_LN	-0.0068	-2.198	30808	31228	628195
Mbuti	Sindhi_Pakistan	Guanzhuang	China_Shimao_LN	-0.0064	-2.176	30978	31377	628166
Mbuti	Tujia	Guanzhuang	China_Shimao_LN	-0.0055	-2.154	33705	34076	646169
Mbuti	Estonian	Guanzhuang	China_Shimao_LN	-0.0064	-2.125	30957	31358	628199
Mbuti	Turkey_EBA_II	Guanzhuang	China_Shimao_LN	-0.007	-2.111	27545	27934	571323
Mbuti	Miao	Guanzhuang	China_Shimao_LN	-0.0064	-2.101	32665	33084	628198
Mbuti	Tajik	Guanzhuang	China_Shimao_LN	-0.006	-2.1	30990	31365	628208
Mbuti	She	Guanzhuang	China_Shimao_LN	-0.0054	-2.099	33717	34080	646163
Mbuti	Hungarian	Guanzhuang	China_Shimao_LN	-0.0064	-2.099	30905	31304	628167
Mbuti	Adygei	Guanzhuang	China_Shimao_LN	-0.0062	-2.081	30905	31288	628172
Mbuti	Kazakhstan_Nomad_IA	Guanzhuang	China_Shimao_LN	-0.0081	-2.07	21951	22309	442544
Mbuti	Brahmin	Guanzhuang	China_Shimao_LN	-0.0058	-2.057	30996	31357	628200
Mbuti	Russia_Samara_EBA_Yamnaya_published	Guanzhuang	China_Shimao_LN	-0.0098	-2.052	14217	14498	295091
Mbuti	Vietnam_BA	Guanzhuang	China_Shimao_LN	-0.0129	-2.049	7487	7684	147244
Mbuti	BedouinB	Guanzhuang	China_Shimao_LN	-0.0061	-2.032	30284	30652	628146
Mbuti	Palestinian	Guanzhuang	China_Shimao_LN	-0.0056	-2.02	30365	30709	628230
Mbuti	Guam_LateUnai_Ritidian	Guanzhuang	China_Shimao_LN	-0.0188	-2.011	2726	2831	57678
Mbuti	Baojianshan	Guanzhuang	China_Shimao_LN	-0.0089	-2.006	19028	19369	381267
Mbuti	Liangdao1	Guanzhuang	China_Shimao_LN	-0.0119	-1.994	8423	8626	175396
Mbuti	JXNT	Guanzhuang	China_Shimao_LN	-0.0067	-1.941	29896	30296	575126
Mbuti	English	Guanzhuang	China_Shimao_LN	-0.0056	-1.939	30959	31306	628192
Mbuti	Greece_BA_Mycenaean	Guanzhuang	China_Shimao_LN	-0.0085	-1.933	10349	10528	233383
Mbuti	Mala	Guanzhuang	China_Shimao_LN	-0.0053	-1.918	31188	31521	628225
Mbuti	LaCen	Guanzhuang	China_Shimao_LN	-0.008	-1.89	20118	20441	396999
Mbuti	Maori	Guanzhuang	China_Shimao_LN	-0.0065	-1.881	31321	31727	626560
Mbuti	Burusho	Guanzhuang	China_Shimao_LN	-0.0055	-1.871	31141	31485	628154
Mbuti	Dushan	Guanzhuang	China_Shimao_LN	-0.0096	-1.825	12634	12879	255530
Mbuti	Makrani	Guanzhuang	China_Shimao_LN	-0.0053	-1.81	30634	30961	628176
Mbuti	Brahui	Guanzhuang	China_Shimao_LN	-0.0051	-1.804	30744	31062	628179
Mbuti	Spanish	Guanzhuang	China_Shimao_LN	-0.0053	-1.8	30816	31147	628141
Mbuti	Russia_Tagar	Guanzhuang	China_Shimao_LN	-0.0048	-1.792	32101	32412	643254
Mbuti	Kazakhstan_Turk	Guanzhuang	China_Shimao_LN	-0.0062	-1.754	29227	29592	584044
Mbuti	Kazakhstan_Kipchak1	Guanzhuang	China_Shimao_LN	-0.0074	-1.752	21529	21850	435066
Mbuti	Burmese	Guanzhuang	China_Shimao_LN	-0.0052	-1.744	32414	32750	628196
Mbuti	China_SEastAsia_Coastal_Historic	Guanzhuang	China_Shimao_LN	-0.0111	-1.705	6667	6817	134425
Mbuti	Chechen	Guanzhuang	China_Shimao_LN	-0.0056	-1.693	30827	31177	626727
Mbuti	Khonda_Dora	Guanzhuang	China_Shimao_LN	-0.0059	-1.682	31457	31833	627427
Mbuti	Punjabi	Guanzhuang	China_Shimao_LN	-0.0046	-1.676	31126	31415	628238
Mbuti	Poland_Globular_Amphora_published	Guanzhuang	China_Shimao_LN	-0.0197	-1.674	1568	1631	33135
Mbuti	Yadava	Guanzhuang	China_Shimao_LN	-0.0048	-1.665	31122	31421	628176
Mbuti	Russia_Alan	Guanzhuang	China_Shimao_LN	-0.0049	-1.66	31663	31972	641890
Mbuti	Orcadian	Guanzhuang	China_Shimao_LN	-0.005	-1.65	30993	31307	628178
Mbuti	Kazakhstan_Karakhanid	Guanzhuang	China_Shimao_LN	-0.0072	-1.638	17801	18059	356468
Mbuti	Japanese	Guanzhuang	China_Shimao_LN	-0.0046	-1.634	32690	32993	628224
Mbuti	China_SEastAsia_Island_EN	Guanzhuang	China_Shimao_LN	-0.0062	-1.585	22898	23186	455144
Mbuti	Sweden_Motala_HG	Guanzhuang	China_Shimao_LN	-0.0051	-1.551	27652	27934	562378
Mbuti	Korean	Guanzhuang	China_Shimao_LN	-0.0049	-1.551	32727	33050	628201
Mbuti	Italy_Sicily_HG_OrienteC	Guanzhuang	China_Shimao_LN	-0.0206	-1.536	1329	1385	27425
Mbuti	Kyrgyzstan_TianShan_Hun	Guanzhuang	China_Shimao_LN	-0.0037	-1.521	32467	32707	646074
Mbuti	Russia_Srubnaya	Guanzhuang	China_Shimao_LN	-0.0041	-1.505	30727	30979	622428
Mbuti	Russia_Samara_EBA_Yamnaya	Guanzhuang	China_Shimao_LN	-0.0043	-1.501	29654	29908	602130
Mbuti	China_Tianyuan	Guanzhuang	China_Shimao_LN	-0.0065	-1.483	21183	21462	434075
Mbuti	Han	Guanzhuang	China_Shimao_LN	-0.0041	-1.483	32791	33062	628233
Mbuti	Mixtec_1	Guanzhuang	China_Shimao_LN	-0.0056	-1.476	31945	32305	626131
Mbuti	Russia_KuengaRiver_N_1	Guanzhuang	China_Shimao_LN	-0.0149	-1.469	2193	2259	43180
Mbuti	Taiwan_Gongguan	Guanzhuang	China_Shimao_LN	-0.007	-1.466	15814	16038	311134
Mbuti	Spain_HG	Guanzhuang	China_Shimao_LN	-0.006	-1.462	25690	25999	521680
Mbuti	Spain_ElMiron	Guanzhuang	China_Shimao_LN	-0.0072	-1.453	13295	13487	281366
Mbuti	Turkish	Guanzhuang	China_Shimao_LN	-0.0042	-1.446	30888	31151	628205
Mbuti	Bergamo	Guanzhuang	China_Shimao_LN	-0.0049	-1.438	30792	31094	626680
Mbuti	Kazakhstan_Karluk_1	Guanzhuang	China_Shimao_LN	-0.0056	-1.437	30330	30672	600387
Mbuti	Igbo	Guanzhuang	China_Shimao_LN	-0.0033	-1.425	25364	25530	628186
Mbuti	Pathan	Guanzhuang	China_Shimao_LN	-0.0041	-1.421	31046	31300	628200
Mbuti	Russia_Samara_EBA_Yamnaya_published2	Guanzhuang	China_Shimao_LN	-0.0054	-1.405	28849	29162	587312
Mbuti	Russia_Ust_Ishim	Guanzhuang	China_Shimao_LN	-0.0051	-1.392	28853	29149	589968
Mbuti	Russia_HG_Karelia	Guanzhuang	China_Shimao_LN	-0.0057	-1.39	26799	27107	545694
Mbuti	Russia_SaltovoMayaki	Guanzhuang	China_Shimao_LN	-0.0144	-1.386	2225	2290	48049
Mbuti	Germany_BellBeaker	Guanzhuang	China_Shimao_LN	-0.0035	-1.38	30935	31154	626319
Mbuti	Icelandic	Guanzhuang	China_Shimao_LN	-0.004	-1.369	31023	31272	628200
Mbuti	Kapu	Guanzhuang	China_Shimao_LN	-0.0039	-1.36	31243	31489	628194
Mbuti	Uyghur	Guanzhuang	China_Shimao_LN	-0.0039	-1.34	31753	32002	628190
Mbuti	Russia_MBA_Poltavka	Guanzhuang	China_Shimao_LN	-0.0048	-1.328	23427	23654	477227
Mbuti	Germany_CordedWare	Guanzhuang	China_Shimao_LN	-0.0039	-1.326	30326	30565	614585
Mbuti	Iranian	Guanzhuang	China_Shimao_LN	-0.004	-1.313	30756	31002	628208
Mbuti	Yakut	Guanzhuang	China_Shimao_LN	-0.0039	-1.307	32439	32693	628174
Mbuti	Jew_Yemenite	Guanzhuang	China_Shimao_LN	-0.0038	-1.304	30445	30678	628184
Mbuti	China_YR_MN	Guanzhuang	China_Shimao_LN	-0.0038	-1.293	33394	33647	640062
Mbuti	Liangdao2	Guanzhuang	China_Shimao_LN	-0.0054	-1.283	22217	22458	441764
Mbuti	China_YR_LBIA	Guanzhuang	China_Shimao_LN	-0.0035	-1.278	33341	33573	638105
Mbuti	Turkey_MLBA_AssyrianColonyPeriod	Guanzhuang	China_Shimao_LN	-0.005	-1.276	20288	20492	416968
Mbuti	Armenian	Guanzhuang	China_Shimao_LN	-0.0036	-1.26	30814	31038	628193
Mbuti	Hungary_IA_Scythian	Guanzhuang	China_Shimao_LN	-0.0042	-1.26	27583	27813	562685
Mbuti	Ulchi	Guanzhuang	China_Shimao_LN	-0.0038	-1.255	32581	32829	628168
Mbuti	Albanian	Guanzhuang	China_Shimao_LN	-0.0043	-1.25	30855	31123	627480
Mbuti	Thai	Guanzhuang	China_Shimao_LN	-0.0038	-1.222	32414	32664	628175
Mbuti	Myanmar_LN_BA_published_lc	Guanzhuang	China_Shimao_LN	-0.0328	-1.211	317	338	6479
Mbuti	Tuscan_1	Guanzhuang	China_Shimao_LN	-0.0035	-1.192	30929	31148	628183
Mbuti	Canada_MDorset	Guanzhuang	China_Shimao_LN	-0.0146	-1.192	1680	1730	34040
Mbuti	Russia_LenaRiver_EN	Guanzhuang	China_Shimao_LN	-0.0048	-1.188	28055	28328	537882
Mbuti	Russia_BA_Okunevo	Guanzhuang	China_Shimao_LN	-0.0031	-1.179	32700	32905	645985
Mbuti	Kazakhstan_Central_Steppe_EMBA	Guanzhuang	China_Shimao_LN	-0.0038	-1.169	32695	32943	645940
Mbuti	BaBanQinCen	Guanzhuang	China_Shimao_LN	-0.0047	-1.168	17800	17969	348809
Mbuti	Druze	Guanzhuang	China_Shimao_LN	-0.0034	-1.165	30633	30842	628156
Mbuti	Russia_Lokomotiv_Eneolithic	Guanzhuang	China_Shimao_LN	-0.0039	-1.152	29658	29891	572509
Mbuti	Russia_Abkhasian	Guanzhuang	China_Shimao_LN	-0.0035	-1.146	30933	31149	628189
Mbuti	Mongolia_Xiongnu_o1	Guanzhuang	China_Shimao_LN	-0.0035	-1.138	33501	33737	645656
Mbuti	Tu	Guanzhuang	China_Shimao_LN	-0.0027	-1.128	33631	33811	646166
Mbuti	Turkey_N	Guanzhuang	China_Shimao_LN	-0.003	-1.128	30955	31144	630533
Mbuti	Russia_IA_EarlySarmatian	Guanzhuang	China_Shimao_LN	-0.0046	-1.128	18742	18915	381641
Mbuti	Tibetan	Guanzhuang	China_Shimao_LN	-0.0033	-1.121	32523	32738	628185
Mbuti	Japan_Jomon	Guanzhuang	China_Shimao_LN	-0.0047	-1.119	25849	26093	508019
Mbuti	French	Guanzhuang	China_Shimao_LN	-0.0032	-1.111	31039	31237	628238
Mbuti	Russia_DevilsCave_N	Guanzhuang	China_Shimao_LN	-0.0036	-1.105	33702	33942	645969
Mbuti	Mansi	Guanzhuang	China_Shimao_LN	-0.0033	-1.099	31808	32015	628206
Mbuti	Moldova_Cimmerian	Guanzhuang	China_Shimao_LN	-0.0043	-1.089	21512	21698	430285
Mbuti	Turkmenistan_C_Namazga	Guanzhuang	China_Shimao_LN	-0.0045	-1.075	17867	18030	373982
Mbuti	Australian	Guanzhuang	China_Shimao_LN	-0.0034	-1.054	31234	31446	628091
Mbuti	Russia_ArgunRiver_M	Guanzhuang	China_Shimao_LN	-0.004	-1.039	32916	33180	634704
Mbuti	Russia_MA1_HG	Guanzhuang	China_Shimao_LN	-0.0046	-1.035	21809	22011	438923
Mbuti	Kazakhstan_Central_Saka	Guanzhuang	China_Shimao_LN	-0.0029	-0.998	31320	31502	618855
Mbuti	Russia_Buryatia_Xiongnu_mother	Guanzhuang	China_Shimao_LN	-0.0045	-0.993	18612	18780	363795
Mbuti	Kazakhstan_Wusun	Guanzhuang	China_Shimao_LN	-0.0036	-0.988	28998	29206	582733
Mbuti	Russia_AfontovaGora2	Guanzhuang	China_Shimao_LN	-0.0115	-0.984	1681	1720	34481
Mbuti	Kazakhstan_Kangju_o1	Guanzhuang	China_Shimao_LN	-0.0037	-0.958	20326	20479	414942
Mbuti	Altaian	Guanzhuang	China_Shimao_LN	-0.0036	-0.95	32164	32394	627047
Mbuti	Laos_LN_BA	Guanzhuang	China_Shimao_LN	-0.004	-0.942	24590	24785	478162
Mbuti	Kazakhstan_Nomad_HP	Guanzhuang	China_Shimao_LN	-0.0031	-0.931	32208	32411	623503
Mbuti	Mexico_Zapotec	Guanzhuang	China_Shimao_LN	-0.003	-0.93	32270	32464	628161
Mbuti	Mongolia_Khuvsgul_XiongnuLatEMedieval_1	Guanzhuang	China_Shimao_LN	-0.0028	-0.925	28393	28553	566831
Mbuti	China_SEastAsia_Coastal_EN	Guanzhuang	China_Shimao_LN	-0.0063	-0.906	6492	6574	132079
Mbuti	Italy_North_Villabruna_HG	Guanzhuang	China_Shimao_LN	-0.004	-0.903	21075	21246	433927
Mbuti	Kyrgyzstan_Medieval_Nomad_o	Guanzhuang	China_Shimao_LN	-0.0045	-0.891	13563	13685	267257
Mbuti	Balochi	Guanzhuang	China_Shimao_LN	-0.0026	-0.883	30955	31118	628144
Mbuti	Germany_EN_LBK	Guanzhuang	China_Shimao_LN	-0.0025	-0.883	30624	30775	623369
Mbuti	Kalash	Guanzhuang	China_Shimao_LN	-0.0027	-0.88	31116	31283	628203
Mbuti	Kusunda	Guanzhuang	China_Shimao_LN	-0.0027	-0.879	32000	32170	628135
Mbuti	LG	Guanzhuang	China_Shimao_LN	-0.0029	-0.855	29453	29627	565731
Mbuti	Lezgin	Guanzhuang	China_Shimao_LN	-0.0025	-0.845	30925	31077	628210
Mbuti	Xibo	Guanzhuang	China_Shimao_LN	-0.0021	-0.841	33698	33838	646163
Mbuti	Czech	Guanzhuang	China_Shimao_LN	-0.0028	-0.827	30990	31162	626986
Mbuti	Greece_Minoan_Odigitria	Guanzhuang	China_Shimao_LN	-0.0051	-0.795	5887	5948	122610
Mbuti	Vietnam_historical	Guanzhuang	China_Shimao_LN	-0.0046	-0.792	7409	7477	143385
Mbuti	Georgia_Satsurblia	Guanzhuang	China_Shimao_LN	-0.0032	-0.787	22940	23088	467106
Mbuti	Eskimo_Sireniki	Guanzhuang	China_Shimao_LN	-0.0025	-0.775	32442	32606	628201
Mbuti	Armenia_C	Guanzhuang	China_Shimao_LN	-0.0024	-0.767	26841	26968	549064
Mbuti	Kazakhstan_Kimak	Guanzhuang	China_Shimao_LN	-0.0049	-0.766	6156	6216	122144
Mbuti	Russia_Krasnoyarsk_BA	Guanzhuang	China_Shimao_LN	-0.0029	-0.76	33432	33629	645826
Mbuti	Nepal_Mebrak_2125BP	Guanzhuang	China_Shimao_LN	-0.0032	-0.744	21184	21319	408002
Mbuti	Relli_1	Guanzhuang	China_Shimao_LN	-0.0025	-0.737	31304	31460	627574
Mbuti	Samaritan	Guanzhuang	China_Shimao_LN	-0.0025	-0.731	30461	30615	624621
Mbuti	Ukraine_Scythian	Guanzhuang	China_Shimao_LN	-0.0025	-0.73	30069	30220	607711
Mbuti	Mongola	Guanzhuang	China_Shimao_LN	-0.0022	-0.728	32648	32795	628197
Mbuti	Russia_Shamanka_EBA	Guanzhuang	China_Shimao_LN	-0.0024	-0.726	30666	30814	592993
Mbuti	Papuan	Guanzhuang	China_Shimao_LN	-0.0021	-0.725	31301	31434	628240
Mbuti	Turkmenistan_C_Namazga_1d	Guanzhuang	China_Shimao_LN	-0.0104	-0.705	1084	1107	22873
Mbuti	Kongo	Guanzhuang	China_Shimao_LN	-0.002	-0.704	25150	25250	626401
Mbuti	Polish	Guanzhuang	China_Shimao_LN	-0.0024	-0.698	30958	31107	627053
Mbuti	Spain_C	Guanzhuang	China_Shimao_LN	-0.0018	-0.681	30613	30722	620519
Mbuti	Vietnam_N_published	Guanzhuang	China_Shimao_LN	-0.0076	-0.68	2066	2097	41495
Mbuti	Daur	Guanzhuang	China_Shimao_LN	-0.0023	-0.668	32611	32758	626633
Mbuti	Vietnam_N_all_published	Guanzhuang	China_Shimao_LN	-0.0067	-0.667	2456	2490	49605
Mbuti	Dungan	Guanzhuang	China_Shimao_LN	-0.0021	-0.663	33561	33699	645995
Mbuti	Laos_BA	Guanzhuang	China_Shimao_LN	-0.0036	-0.662	10318	10393	202286
Mbuti	Kazakhstan_TianShan_Saka	Guanzhuang	China_Shimao_LN	-0.007	-0.662	2071	2100	42529
Mbuti	Mongolia_Dundgobi_LatEMedieval	Guanzhuang	China_Shimao_LN	-0.0029	-0.645	21217	21339	413490
Mbuti	Vietnam_N	Guanzhuang	China_Shimao_LN	-0.004	-0.623	5188	5230	103228
Mbuti	Mixe	Guanzhuang	China_Shimao_LN	-0.0019	-0.611	32333	32458	628224
Mbuti	Georgian	Guanzhuang	China_Shimao_LN	-0.0018	-0.61	30883	30997	628205
Mbuti	Estonia_CordedWare	Guanzhuang	China_Shimao_LN	-0.0019	-0.597	27690	27797	564332
Mbuti	Russia_EarlyMedieval_Heshui_Mohe_1	Guanzhuang	China_Shimao_LN	-0.0041	-0.595	6226	6277	122540
Mbuti	Turkmenistan_Gonur_BA_1	Guanzhuang	China_Shimao_LN	-0.0017	-0.587	23678	23760	484549
Mbuti	Yiyang	Guanzhuang	China_Shimao_LN	-0.004	-0.57	5807	5853	117051
Mbuti	Kazakhstan_Nomad_Hun_Sarmatian	Guanzhuang	China_Shimao_LN	-0.002	-0.562	28298	28413	550497
Mbuti	Russia_NorthOssetian	Guanzhuang	China_Shimao_LN	-0.0017	-0.554	31094	31198	628216
Mbuti	China_Upper_YR_IA	Guanzhuang	China_Shimao_LN	-0.0017	-0.551	31944	32054	611091
Mbuti	Piapoco	Guanzhuang	China_Shimao_LN	-0.0018	-0.55	32349	32464	628145
Mbuti	Russia_Tuva_IA_AldyBel	Guanzhuang	China_Shimao_LN	-0.0022	-0.545	19657	19744	395861
Mbuti	Russia_MLBA_Sintashta	Guanzhuang	China_Shimao_LN	-0.0014	-0.527	31130	31215	627635
Mbuti	Kazakhstan_Kumsay_EBA	Guanzhuang	China_Shimao_LN	-0.0018	-0.518	24341	24427	489864
Mbuti	Russia_AfontovaGora3	Guanzhuang	China_Shimao_LN	-0.0037	-0.497	5188	5226	110309
Mbuti	Karitiana	Guanzhuang	China_Shimao_LN	-0.0016	-0.491	32434	32539	628215
Mbuti	Vanuatu_2900BP	Guanzhuang	China_Shimao_LN	-0.0043	-0.49	3219	3247	63200
Mbuti	Russia_Chita_BA	Guanzhuang	China_Shimao_LN	-0.0034	-0.483	4917	4950	94692
Mbuti	Russia_CentralYakutia_LN	Guanzhuang	China_Shimao_LN	-0.0018	-0.481	32549	32665	625857
Mbuti	Hazara	Guanzhuang	China_Shimao_LN	-0.0013	-0.462	31872	31957	628151
Mbuti	Mongolia_Khentii_EIA_SlabGrave	Guanzhuang	China_Shimao_LN	-0.0041	-0.461	3200	3227	62861
Mbuti	Chukchi	Guanzhuang	China_Shimao_LN	-0.0015	-0.458	31848	31946	627556
Mbuti	Koryak	Guanzhuang	China_Shimao_LN	-0.0015	-0.457	33572	33674	646146
Mbuti	Spain_MLN	Guanzhuang	China_Shimao_LN	-0.0012	-0.446	30272	30344	614149
Mbuti	Russia_KuengaRiver_N_2	Guanzhuang	China_Shimao_LN	-0.0018	-0.435	30165	30275	576869
Mbuti	Georgia_Kotias	Guanzhuang	China_Shimao_LN	-0.0016	-0.427	31814	31916	645712
Mbuti	Mayan	Guanzhuang	China_Shimao_LN	-0.0013	-0.413	32359	32442	628108
Mbuti	Quechua	Guanzhuang	China_Shimao_LN	-0.0013	-0.41	32361	32444	628172
Mbuti	China_SEastAsia_Island_LN	Guanzhuang	China_Shimao_LN	-0.0058	-0.408	1211	1225	24899
Mbuti	Suogang	Guanzhuang	China_Shimao_LN	-0.0058	-0.408	1211	1225	24899
Mbuti	Mongolia_Dornod_Xiongnu	Guanzhuang	China_Shimao_LN	-0.0015	-0.379	25333	25410	491219
Mbuti	Russia_Siberia_Tenisei_EBA	Guanzhuang	China_Shimao_LN	-0.0016	-0.379	19819	19884	391040
Mbuti	China_YR_LN	Guanzhuang	China_Shimao_LN	-0.0009	-0.35	33818	33882	644487
Mbuti	China_WLR_BA	Guanzhuang	China_Shimao_LN	-0.0015	-0.338	16651	16700	321490
Mbuti	Israel_C	Guanzhuang	China_Shimao_LN	-0.001	-0.334	27598	27652	566576
Mbuti	Russia_Afanasievo	Guanzhuang	China_Shimao_LN	-0.0009	-0.33	30941	30996	622408
Mbuti	Iran_C_SehGabi	Guanzhuang	China_Shimao_LN	-0.0011	-0.329	26715	26771	546134
Mbuti	Longlin	Guanzhuang	China_Shimao_LN	-0.0027	-0.328	3890	3912	80022
Mbuti	USA_Anzick_realigned	Guanzhuang	China_Shimao_LN	-0.0013	-0.322	32907	32993	636543
Mbuti	Bougainville	Guanzhuang	China_Shimao_LN	-0.0011	-0.322	31559	31627	627949
Mbuti	Russia_Potapovka	Guanzhuang	China_Shimao_LN	-0.0027	-0.317	3596	3616	73358
Mbuti	China_HMMH_MN	Guanzhuang	China_Shimao_LN	-0.0014	-0.316	20472	20529	397069
Mbuti	Tubalar	Guanzhuang	China_Shimao_LN	-0.0009	-0.313	32071	32129	628211
Mbuti	Russia_Karasuk_oRISE	Guanzhuang	China_Shimao_LN	-0.0009	-0.313	32342	32397	643625
Mbuti	Russia_Kurma_EBA	Guanzhuang	China_Shimao_LN	-0.0014	-0.311	19980	20034	389555
Mbuti	Nahua	Guanzhuang	China_Shimao_LN	-0.001	-0.286	32359	32426	627468
Mbuti	Surui	Guanzhuang	China_Shimao_LN	-0.001	-0.282	32476	32540	628145
Mbuti	Kurumba	Guanzhuang	China_Shimao_LN	-0.001	-0.274	31179	31239	624776
Mbuti	Kazakhstan_ZevakinoChilikta_IA_2	Guanzhuang	China_Shimao_LN	-0.0016	-0.272	8238	8264	164409
Mbuti	Mongolia_Bulgan_EarlyMedieval	Guanzhuang	China_Shimao_LN	-0.0011	-0.268	22995	23046	447957
Mbuti	Sherpa	Guanzhuang	China_Shimao_LN	-0.0008	-0.246	32722	32772	628190
Mbuti	Slovakia_Poprad	Guanzhuang	China_Shimao_LN	-0.0012	-0.238	13291	13321	270152
Mbuti	Moldova_Glinoe_Scythian	Guanzhuang	China_Shimao_LN	-0.0007	-0.226	30510	30551	614354
Mbuti	Aleut	Guanzhuang	China_Shimao_LN	-0.0006	-0.207	31981	32021	628217
Mbuti	Vietnam_BA_all	Guanzhuang	China_Shimao_LN	-0.001	-0.193	11299	11322	219612
Mbuti	Spain_EN	Guanzhuang	China_Shimao_LN	-0.0006	-0.191	27709	27741	567262
Mbuti	Russia_AngaraRiver_EN	Guanzhuang	China_Shimao_LN	-0.0007	-0.164	31663	31705	609514
Mbuti	Yi	Guanzhuang	China_Shimao_LN	-0.0005	-0.149	32863	32893	628188
Mbuti	Kazakhstan_GoldenHordeAsian	Guanzhuang	China_Shimao_LN	-0.0005	-0.123	31612	31642	610737
Mbuti	Canada_MDorset_published	Guanzhuang	China_Shimao_LN	-0.0012	-0.116	2663	2669	50818
Mbuti	Kazakhstan_Wusun_LateSaka_dup	Guanzhuang	China_Shimao_LN	-0.0007	-0.106	6755	6765	134292
Mbuti	Russia_UstIda_LN	Guanzhuang	China_Shimao_LN	-0.0003	-0.102	30666	30686	596293
Mbuti	Bulgaria_Varna_C	Guanzhuang	China_Shimao_LN	-0.0005	-0.099	9496	9506	196183
Mbuti	Mongolia_Ulaanbaatar_EIALatEMedieval	Guanzhuang	China_Shimao_LN	-0.0004	-0.077	12521	12531	245137
Mbuti	Mongolia_Arkhangai_PreBronze	Guanzhuang	China_Shimao_LN	-0.0003	-0.07	20197	20209	392067
Mbuti	Taiwan_Hanben_IA_lc	Guanzhuang	China_Shimao_LN	-0.0006	-0.056	1777	1780	34947
Mbuti	USA_Ancient_Beringian	Guanzhuang	China_Shimao_LN	-0.0002	-0.046	33355	33366	646107
Mbuti	Mongolia_Selenge_Xiongnu	Guanzhuang	China_Shimao_LN	-0.0002	-0.037	24377	24384	468426
Mbuti	Laos_Hoabinhian	Guanzhuang	China_Shimao_LN	-0.0002	-0.036	13712	13717	280125
Mbuti	Chipewyan	Guanzhuang	China_Shimao_LN	-0.0001	-0.032	32438	32445	628195
Mbuti	Irula	Guanzhuang	China_Shimao_LN	-0.0001	-0.031	31286	31291	628197
Mbuti	Kashmiri_Pandit	Guanzhuang	China_Shimao_LN	-0.0001	-0.028	31096	31103	626891
Mbuti	Bulgaria_IA	Guanzhuang	China_Shimao_LN	-0.0001	-0.021	13856	13859	283444
Mbuti	Russia_Kalmykia_EBA_Yamnaya	Guanzhuang	China_Shimao_LN	0	-0.015	29513	29516	598786
Mbuti	Russia_UstIda_EBA	Guanzhuang	China_Shimao_LN	0	-0.014	25032	25035	488043
Mbuti	Russia_Siberia_Lena_EBA_o	Guanzhuang	China_Shimao_LN	-0.0001	-0.009	1710	1710	34311
Mbuti	Thailand_IA	Guanzhuang	China_Shimao_LN	0.0005	0.022	484	483	9589
Mbuti	China_AR_IA	Guanzhuang	China_Shimao_LN	0.0003	0.026	1442	1441	29044
Mbuti	Cree1	Guanzhuang	China_Shimao_LN	0.0001	0.033	31926	31919	626992
Mbuti	Even	Guanzhuang	China_Shimao_LN	0.0001	0.045	32639	32630	628208
Mbuti	Russia_Blagovechensk_IA	Guanzhuang	China_Shimao_LN	0.0004	0.076	13582	13572	261070
Mbuti	Mongolia_Arkhangai_XiongnuEarlyMedieval_1	Guanzhuang	China_Shimao_LN	0.0004	0.09	23408	23390	474975
Mbuti	Hezhen	Guanzhuang	China_Shimao_LN	0.0003	0.09	32766	32747	628201
Mbuti	Lemande	Guanzhuang	China_Shimao_LN	0.0002	0.094	25451	25439	628173
Mbuti	Chane	Guanzhuang	China_Shimao_LN	0.0004	0.12	32418	32390	627315
Mbuti	Mongolia_Selenge_XiongnuMedieval_o1	Guanzhuang	China_Shimao_LN	0.0008	0.125	7565	7553	147742
Mbuti	Pima	Guanzhuang	China_Shimao_LN	0.0004	0.132	32454	32426	628143
Mbuti	China_WLR_BA_o	Guanzhuang	China_Shimao_LN	0.0005	0.134	22002	21978	425167
Mbuti	Mongolia_Bulgan_LatEMedieval	Guanzhuang	China_Shimao_LN	0.0006	0.142	21391	21366	413717
Mbuti	Mongolia_IA_Xianbei	Guanzhuang	China_Shimao_LN	0.0007	0.155	19628	19600	383549
Mbuti	Russia_UstBelaya_Angara	Guanzhuang	China_Shimao_LN	0.0005	0.158	30853	30824	595781
Mbuti	Mongolia_Bulgan_Xiongnu	Guanzhuang	China_Shimao_LN	0.0006	0.164	26869	26837	519869
Mbuti	Russia_IA_2	Guanzhuang	China_Shimao_LN	0.0008	0.168	22162	22129	439382
Mbuti	Russia_KolymaRiver_LN	Guanzhuang	China_Shimao_LN	0.0005	0.175	33637	33600	646064
Mbuti	Eskimo_Chaplin	Guanzhuang	China_Shimao_LN	0.0007	0.18	32643	32599	627585
Mbuti	Russia_KadalinkaRiver_N	Guanzhuang	China_Shimao_LN	0.0008	0.19	31456	31407	601176
Mbuti	Russia_AginBuryat_N	Guanzhuang	China_Shimao_LN	0.0011	0.225	11365	11341	218357
Mbuti	Jordan_EBA	Guanzhuang	China_Shimao_LN	0.0008	0.238	20277	20243	418279
Mbuti	Eskimo_Naukan	Guanzhuang	China_Shimao_LN	0.0008	0.248	32563	32512	628181
Mbuti	Iran_GanjDareh_N	Guanzhuang	China_Shimao_LN	0.0008	0.248	27655	27613	567230
Mbuti	Greece_Minoan_Lassithi	Guanzhuang	China_Shimao_LN	0.0008	0.253	26200	26157	538949
Mbuti	Mongolia_Uvurkhangai_Xiongnu	Guanzhuang	China_Shimao_LN	0.0009	0.257	27902	27852	538564
Mbuti	Naxi	Guanzhuang	China_Shimao_LN	0.0008	0.282	32929	32877	628229
Mbuti	Mongolia_LBA_Ulaanzukh_2_dup	Guanzhuang	China_Shimao_LN	0.0013	0.298	21822	21765	423277
Mbuti	Vanuatu_3000BP	Guanzhuang	China_Shimao_LN	0.0029	0.303	2903	2886	56491
Mbuti	Mongolia_EIA_Xiongnu_7	Guanzhuang	China_Shimao_LN	0.0013	0.31	19143	19091	371323
Mbuti	Mongolia_Tuv_EIA	Guanzhuang	China_Shimao_LN	0.0016	0.312	14835	14789	286268
Mbuti	Mongolia_Bulgan_EarlyMedievalLatEMedieval	Guanzhuang	China_Shimao_LN	0.0009	0.317	31480	31424	607694
Mbuti	China_Xinjian_IA	Guanzhuang	China_Shimao_LN	0.0012	0.33	22980	22925	453016
Mbuti	Russia_Buryatia_PreBronze	Guanzhuang	China_Shimao_LN	0.0014	0.341	22077	22017	427398
Mbuti	Pakistan_Loebanr_IA	Guanzhuang	China_Shimao_LN	0.0008	0.343	30426	30376	613501
Mbuti	Mongolia_Arkhangai_XiongnuEarlyMedieval_3	Guanzhuang	China_Shimao_LN	0.001	0.373	32169	32103	627276
Mbuti	Russia_LBA_1	Guanzhuang	China_Shimao_LN	0.0045	0.391	1768	1753	36314
Mbuti	Bulgaria_C	Guanzhuang	China_Shimao_LN	0.0012	0.419	26744	26679	544240
Mbuti	Russia_CentralYakutia_IA	Guanzhuang	China_Shimao_LN	0.0049	0.46	2224	2202	42106
Mbuti	Mongolia_Arkhangai_EarlyMedieval	Guanzhuang	China_Shimao_LN	0.0012	0.464	31307	31233	626496
Mbuti	Buryat	Guanzhuang	China_Shimao_LN	0.0013	0.486	33533	33446	646170
Mbuti	Mongolia_EIA_8	Guanzhuang	China_Shimao_LN	0.0023	0.494	19296	19208	374002
Mbuti	Russia_Shamanka_Eneolithic	Guanzhuang	China_Shimao_LN	0.0013	0.495	33752	33664	646105
Mbuti	Mongolia_Khentii_Xiongnu_daughter	Guanzhuang	China_Shimao_LN	0.0025	0.502	15743	15666	305954
Mbuti	Mongolia_Tuv_Xiongnu	Guanzhuang	China_Shimao_LN	0.002	0.505	27850	27740	534812
Mbuti	Mongolia_Arkhangai_Xiongnu_o	Guanzhuang	China_Shimao_LN	0.0021	0.506	26040	25929	502121
Mbuti	China_Wuzhuangguoliang_LN	Guanzhuang	China_Shimao_LN	0.0061	0.553	1320	1304	25915
Mbuti	Armenia_EBA	Guanzhuang	China_Shimao_LN	0.0018	0.562	26111	26018	532868
Mbuti	China_AR_Xianbei_IA	Guanzhuang	China_Shimao_LN	0.0031	0.564	7894	7845	152243
Mbuti	Mongolia_Arkhangai_MLBAtoEIAorMedieval_o	Guanzhuang	China_Shimao_LN	0.0044	0.602	5165	5120	100203
Mbuti	China_AmurRiver_EarlyN	Guanzhuang	China_Shimao_LN	0.0026	0.622	18216	18120	354760
Mbuti	Mongolia_Sukhbaatar_MLBAXiongnuLatEMedieval	Guanzhuang	China_Shimao_LN	0.0017	0.631	32397	32288	621725
Mbuti	Israel_Natufian_published	Guanzhuang	China_Shimao_LN	0.0051	0.637	4043	4002	83738
Mbuti	Kazakhstan_Korgantas_IA	Guanzhuang	China_Shimao_LN	0.0028	0.68	24196	24061	468379
Mbuti	Russia_Siberia_UP	Guanzhuang	China_Shimao_LN	0.0035	0.719	14702	14600	289003
Mbuti	Vanuatu_2900BP_all	Guanzhuang	China_Shimao_LN	0.0054	0.734	4797	4746	93574
Mbuti	Mongolia_Sukhbaatar_MLBAXiongnuLatEMedieval_sister	Guanzhuang	China_Shimao_LN	0.0094	0.743	1607	1577	30791
Mbuti	Mongolia_Khentii_Xiongnu	Guanzhuang	China_Shimao_LN	0.0031	0.748	24058	23911	464199
Mbuti	Bulgaria_BeliBreyag_EBA	Guanzhuang	China_Shimao_LN	0.0051	0.756	5663	5605	117650
Mbuti	Mongolia_Khovd_MLBAEarlyMedieval	Guanzhuang	China_Shimao_LN	0.0025	0.773	27771	27630	550685
Mbuti	Russia_Andronovo	Guanzhuang	China_Shimao_LN	0.0024	0.773	31639	31490	637198
Mbuti	Russia_KolymaRiver_LN_1d	Guanzhuang	China_Shimao_LN	0.0039	0.79	12333	12238	235744
Mbuti	Mongolia_Khuvsgul_XiongnuLatEMedieval_2	Guanzhuang	China_Shimao_LN	0.0023	0.798	30405	30267	588260
Mbuti	Mongolia_Sukhbaatar_MLBA	Guanzhuang	China_Shimao_LN	0.0039	0.805	15394	15274	298901
Mbuti	Boshan	Guanzhuang	China_Shimao_LN	0.0032	0.806	25589	25425	496783
Mbuti	Armenia_LBA	Guanzhuang	China_Shimao_LN	0.0038	0.843	12357	12262	256334
Mbuti	Guanzhuang_o1	Guanzhuang	China_Shimao_LN	0.0157	0.855	737	714	13636
Mbuti	Mongolia_Tuv_LatEMedieval	Guanzhuang	China_Shimao_LN	0.0028	0.866	26764	26612	517253
Mbuti	Philippines_RedSlippedPottery	Guanzhuang	China_Shimao_LN	0.0178	0.919	596	575	11553
Mbuti	Nepal_Samdzong_1500BP	Guanzhuang	China_Shimao_LN	0.0027	0.974	33770	33585	645697
Mbuti	Mongolia_Dornod_PreBronze	Guanzhuang	China_Shimao_LN	0.0076	0.993	4699	4628	92162
Mbuti	Oroqen	Guanzhuang	China_Shimao_LN	0.0032	1.004	32889	32680	628173
Mbuti	Mongolia_Chalcolithic_Afanasievo_1	Guanzhuang	China_Shimao_LN	0.0046	1.009	18277	18111	369139
Mbuti	Kazakhstan_Botai_Eneolithic	Guanzhuang	China_Shimao_LN	0.0037	1.019	23556	23382	468943
Mbuti	China_Upper_YR_LN	Guanzhuang	China_Shimao_LN	0.003	1.02	33695	33494	638920
Mbuti	Mongolia_Sukhbaatar_LatEMedieval	Guanzhuang	China_Shimao_LN	0.0027	1.044	33230	33052	635595
Mbuti	Kazakhstan_IA_Berel_Pazyryk	Guanzhuang	China_Shimao_LN	0.0036	1.07	28836	28629	564888
Mbuti	Kazakhstan_IA_Saka_dup	Guanzhuang	China_Shimao_LN	0.0086	1.083	4307	4233	85552
Mbuti	Mongolia_Khentii_LatEMedieval	Guanzhuang	China_Shimao_LN	0.0038	1.091	26477	26276	513035
Mbuti	Jordan_PPNB_published	Guanzhuang	China_Shimao_LN	0.0096	1.094	3325	3262	68825
Mbuti	Mongolia_Uvs_EIAXiongnuLateMedival	Guanzhuang	China_Shimao_LN	0.0031	1.126	31023	30831	613004
Mbuti	China_AmurRiver_LPaleolithic	Guanzhuang	China_Shimao_LN	0.0042	1.139	22163	21978	431335
Mbuti	Mongolia_Dornod_LatEMedieval	Guanzhuang	China_Shimao_LN	0.0033	1.156	31539	31335	607739
Mbuti	China_WLR_LN	Guanzhuang	China_Shimao_LN	0.0044	1.18	26086	25859	498136
Mbuti	Shandong_EN	Guanzhuang	China_Shimao_LN	0.0041	1.2	25502	25296	491642
Mbuti	Canada_LateDorset	Guanzhuang	China_Shimao_LN	0.0073	1.203	7595	7486	146742
Mbuti	Russia_Mezhovskaya	Guanzhuang	China_Shimao_LN	0.0044	1.209	27943	27698	562892
Mbuti	China_Miaozigou_MN	Guanzhuang	China_Shimao_LN	0.0067	1.236	9323	9199	178827
Mbuti	Mongolia_EBA_Ulgii_1_dup	Guanzhuang	China_Shimao_LN	0.0055	1.339	26300	26014	509875
Mbuti	Greenland_Saqqaq	Guanzhuang	China_Shimao_LN	0.0054	1.347	30036	29711	580552
Mbuti	Russia_MN_Boisman	Guanzhuang	China_Shimao_LN	0.0043	1.351	27345	27111	525540
Mbuti	Mongolia_Arkhangai_XiongnuEarlyMedieval_2	Guanzhuang	China_Shimao_LN	0.0049	1.359	21708	21495	437731
Mbuti	Mongolia_LBA_CenterWest_4_o	Guanzhuang	China_Shimao_LN	0.0064	1.461	19991	19735	385850
Mbuti	Kazakhstan_Berel_IA_o3	Guanzhuang	China_Shimao_LN	0.0044	1.463	31489	31213	606216
Mbuti	China_AR_EN	Guanzhuang	China_Shimao_LN	0.0077	1.496	9775	9626	188177
Mbuti	Mongolia_East_N	Guanzhuang	China_Shimao_LN	0.0055	1.545	26636	26343	510019
Mbuti	Russia_Buryatia_Xiongnu	Guanzhuang	China_Shimao_LN	0.0047	1.618	30198	29916	580633
Mbuti	Mongolia_Umungobi_LatEMedieval	Guanzhuang	China_Shimao_LN	0.0048	1.635	29838	29554	576129
Mbuti	China_WLR_MN	Guanzhuang	China_Shimao_LN	0.0063	1.693	33797	33372	639908
Mbuti	Mongolia_North_N	Guanzhuang	China_Shimao_LN	0.0052	1.696	29341	29040	564098
Mbuti	China_NEastAsia_Coastal_EN	Guanzhuang	China_Shimao_LN	0.0052	1.741	28935	28634	555191
Mbuti	Mongolia_EBA_Chemurchek_2	Guanzhuang	China_Shimao_LN	0.0063	1.758	22699	22413	457497
Mbuti	Mongolia_Khovd_MLBAXiongnuLatEMedieval	Guanzhuang	China_Shimao_LN	0.0087	1.862	13603	13367	262065
Mbuti	Mongolia_Uvurkhangai_EIALatEMedieval	Guanzhuang	China_Shimao_LN	0.0067	1.9	26533	26182	510950
Mbuti	China_AmurRiver_Mesolithic	Guanzhuang	China_Shimao_LN	0.0076	1.91	16467	16218	319907
Mbuti	China_AmurRiver_N	Guanzhuang	China_Shimao_LN	0.0078	2.209	21378	21049	412875
Mbuti	China_AmurRiver_BA	Guanzhuang	China_Shimao_LN	0.0559	2.221	449	402	8231
Mbuti	Russia_IA_Yankovsky	Guanzhuang	China_Shimao_LN	0.0115	2.437	15884	15522	303753
Mbuti	Russia_Siberia_Irkutsk_EBA	Guanzhuang	China_Shimao_LN	0.0088	2.465	26542	26081	508832
Mbuti	Mongolia_EIA_SlabGrave_1	Guanzhuang	China_Shimao_LN	0.0069	2.599	31798	31365	607009
Mbuti	Mongolia_LBA_Ulaanzukh_2	Guanzhuang	China_Shimao_LN	0.0107	2.938	23561	23064	452401
Mbuti	Mongolia_Chalcolithic_Afanasievo_2	Guanzhuang	China_Shimao_LN	0.0134	2.976	17504	17040	336418
Mbuti	China_NEastAsia_Inland_EN	Guanzhuang	China_Shimao_LN	0.0165	3.703	20976	20297	404292
Mbuti	Yumin	Guanzhuang	China_Shimao_LN	0.0165	3.703	20976	20297	404292

## Sheet: F
Table S2F. f4(Mbuti, Reference; X, Guanzhuang) to evaluate the genetic divergence between the Guanzhuang population and population X. The 'Reference' group consists of 287 ancient and contemporary populations, while population X includes ancient populations from various regions of East Asia. |Z|>3 indicates the significant values, highlighted in Datas by blue (positive) and red (negative) ; 2<|Z|…
f4(Mbuti, Reference; Guanzhuang, China_Upper_YR_IA)
pop1	pop2	pop3	pop4	f4	Z	ABAB	ABBA	SNPs
Mbuti	JPT	Guanzhuang	China_Upper_YR_IA	-0.0109	-4.917	32200	32910	620490
Mbuti	Tonga_2500BP	Guanzhuang	China_Upper_YR_IA	-0.0282	-4.143	5283	5589	105650
Mbuti	CHS	Guanzhuang	China_Upper_YR_IA	-0.0091	-4.087	32243	32837	620490
Mbuti	CHB	Guanzhuang	China_Upper_YR_IA	-0.0083	-3.732	32294	32834	620490
Mbuti	Kinh	Guanzhuang	China_Upper_YR_IA	-0.0093	-3.245	31199	31787	604273
Mbuti	KHV	Guanzhuang	China_Upper_YR_IA	-0.0069	-3.098	32186	32632	620490
Mbuti	CDX	Guanzhuang	China_Upper_YR_IA	-0.0068	-3.047	32199	32639	620490
Mbuti	Indonesia_LN_BA_IA	Guanzhuang	China_Upper_YR_IA	-0.0242	-2.817	2695	2829	55614
Mbuti	Taiwan_Liangdao_LatePaleolithic	Guanzhuang	China_Upper_YR_IA	-0.0202	-2.754	4305	4482	80901
Mbuti	Russia_DevilsCave_N	Guanzhuang	China_Upper_YR_IA	-0.0078	-2.546	32144	32647	620291
Mbuti	Han	Guanzhuang	China_Upper_YR_IA	-0.0067	-2.527	31404	31826	604354
Mbuti	Lebanon_MBA	Guanzhuang	China_Upper_YR_IA	-0.0066	-2.442	30084	30482	614853
Mbuti	Mongolia_Xiongnu_o1	Guanzhuang	China_Upper_YR_IA	-0.0066	-2.286	32002	32424	620002
Mbuti	China_SEastAsia_Island_LN	Guanzhuang	China_Upper_YR_IA	-0.0312	-2.278	1170	1245	24404
Mbuti	Suogang	Guanzhuang	China_Upper_YR_IA	-0.0312	-2.278	1170	1245	24404
Mbuti	Atayal	Guanzhuang	China_Upper_YR_IA	-0.0077	-2.227	31234	31717	603246
Mbuti	Maori	Guanzhuang	China_Upper_YR_IA	-0.0069	-2.224	30098	30515	602737
Mbuti	Qihe3	Guanzhuang	China_Upper_YR_IA	-0.0098	-2.201	15239	15541	304788
Mbuti	Kazakhstan_Nomad_HP	Guanzhuang	China_Upper_YR_IA	-0.007	-2.13	30771	31202	598700
Mbuti	USA_Ancient_Beringian	Guanzhuang	China_Upper_YR_IA	-0.0076	-2.121	31754	32242	620423
Mbuti	Laos_LN_BA	Guanzhuang	China_Upper_YR_IA	-0.0078	-2.033	23449	23818	459034
Mbuti	Burmese	Guanzhuang	China_Upper_YR_IA	-0.0056	-2.03	31127	31479	604321
Mbuti	Canada_MDorset_published	Guanzhuang	China_Upper_YR_IA	-0.0198	-2.012	2556	2659	49766
Mbuti	Hungary_IA_Scythian	Guanzhuang	China_Upper_YR_IA	-0.0061	-1.999	26399	26724	540250
Mbuti	LG	Guanzhuang	China_Upper_YR_IA	-0.0066	-1.999	28307	28681	545768
Mbuti	Mongolia_Tuv_EIA	Guanzhuang	China_Upper_YR_IA	-0.0096	-1.986	14238	14513	278771
Mbuti	JXNT	Guanzhuang	China_Upper_YR_IA	-0.0065	-1.95	28825	29200	554465
Mbuti	Tibetan	Guanzhuang	China_Upper_YR_IA	-0.0054	-1.938	31179	31514	604309
Mbuti	China_Tianyuan	Guanzhuang	China_Upper_YR_IA	-0.008	-1.926	20657	20989	423335
Mbuti	Nepal_Chokhopani_2800BP	Guanzhuang	China_Upper_YR_IA	-0.007	-1.915	32130	32587	619730
Mbuti	China_SEastAsia_Coastal_Historic	Guanzhuang	China_Upper_YR_IA	-0.0119	-1.904	6529	6686	131446
Mbuti	Turkmenistan_IA	Guanzhuang	China_Upper_YR_IA	-0.007	-1.884	25322	25679	518988
Mbuti	Eskimo_Sireniki	Guanzhuang	China_Upper_YR_IA	-0.0056	-1.859	31060	31409	604324
Mbuti	She	Guanzhuang	China_Upper_YR_IA	-0.0043	-1.848	32383	32665	620477
Mbuti	Kazakhstan_Karakhanid	Guanzhuang	China_Upper_YR_IA	-0.0076	-1.848	17072	17333	342454
Mbuti	Igorot	Guanzhuang	China_Upper_YR_IA	-0.0053	-1.843	31289	31621	604292
Mbuti	Kazakhstan_Central_Steppe_EMBA	Guanzhuang	China_Upper_YR_IA	-0.0058	-1.84	31314	31679	620266
Mbuti	Mongolia_Bulgan_Xiongnu	Guanzhuang	China_Upper_YR_IA	-0.006	-1.837	25828	26139	503480
Mbuti	Russia_EBA_o1	Guanzhuang	China_Upper_YR_IA	-0.0113	-1.837	5775	5908	118510
Mbuti	Dai	Guanzhuang	China_Upper_YR_IA	-0.0046	-1.834	32249	32549	620488
Mbuti	Russia_ArgunRiver_M	Guanzhuang	China_Upper_YR_IA	-0.0066	-1.805	31518	31938	609494
Mbuti	Korean	Guanzhuang	China_Upper_YR_IA	-0.0052	-1.798	31431	31762	604319
Mbuti	USA_Anzick_realigned	Guanzhuang	China_Upper_YR_IA	-0.007	-1.784	31417	31858	612052
Mbuti	Russia_HG_Karelia	Guanzhuang	China_Upper_YR_IA	-0.0066	-1.783	25962	26307	529078
Mbuti	Russia_KadalinkaRiver_N	Guanzhuang	China_Upper_YR_IA	-0.0069	-1.783	29967	30387	577667
Mbuti	China_Lahu	Guanzhuang	China_Upper_YR_IA	-0.0052	-1.774	31281	31609	604294
Mbuti	Baojianshan	Guanzhuang	China_Upper_YR_IA	-0.0074	-1.765	18588	18865	371163
Mbuti	Russia_KolymaRiver_LN	Guanzhuang	China_Upper_YR_IA	-0.0054	-1.761	32134	32481	620386
Mbuti	Xibo	Guanzhuang	China_Upper_YR_IA	-0.0041	-1.756	32258	32524	620476
Mbuti	Miao	Guanzhuang	China_Upper_YR_IA	-0.0041	-1.755	32369	32633	620473
Mbuti	Laos_BA	Guanzhuang	China_Upper_YR_IA	-0.0093	-1.739	9729	9912	193209
Mbuti	Russia_Lokomotiv_Eneolithic	Guanzhuang	China_Upper_YR_IA	-0.0054	-1.732	28383	28692	549711
Mbuti	Australian	Guanzhuang	China_Upper_YR_IA	-0.0049	-1.721	29988	30282	604209
Mbuti	Chukchi	Guanzhuang	China_Upper_YR_IA	-0.0055	-1.705	30456	30791	603701
Mbuti	Vietnam_BA	Guanzhuang	China_Upper_YR_IA	-0.0103	-1.656	7330	7483	143342
Mbuti	Mongolia_Dornod_Xiongnu	Guanzhuang	China_Upper_YR_IA	-0.0064	-1.653	24432	24744	476303
Mbuti	Russia_BA_Okunevo	Guanzhuang	China_Upper_YR_IA	-0.0041	-1.633	31338	31597	620303
Mbuti	China_Xinjian_IA	Guanzhuang	China_Upper_YR_IA	-0.0055	-1.609	22027	22271	435673
Mbuti	Dusun	Guanzhuang	China_Upper_YR_IA	-0.0046	-1.599	31228	31514	604264
Mbuti	Guam_LateUnai_Ritidian	Guanzhuang	China_Upper_YR_IA	-0.0145	-1.599	2680	2759	56304
Mbuti	Orcadian	Guanzhuang	China_Upper_YR_IA	-0.0045	-1.584	29798	30066	604299
Mbuti	USA_WA_Kennewick	Guanzhuang	China_Upper_YR_IA	-0.0063	-1.573	19228	19470	377773
Mbuti	Japanese	Guanzhuang	China_Upper_YR_IA	-0.0042	-1.569	31433	31699	604347
Mbuti	Mixtec_1	Guanzhuang	China_Upper_YR_IA	-0.0053	-1.568	30688	31014	602350
Mbuti	English	Guanzhuang	China_Upper_YR_IA	-0.0044	-1.532	29794	30060	604309
Mbuti	Mongolia_Bulgan_LatEMedieval	Guanzhuang	China_Upper_YR_IA	-0.006	-1.527	20587	20837	401765
Mbuti	Poland_Globular_Amphora_published	Guanzhuang	China_Upper_YR_IA	-0.0182	-1.525	1540	1597	32472
Mbuti	Burusho	Guanzhuang	China_Upper_YR_IA	-0.0041	-1.515	29945	30194	604279
Mbuti	Thai	Guanzhuang	China_Upper_YR_IA	-0.0042	-1.496	31140	31406	604299
Mbuti	Cambodian	Guanzhuang	China_Upper_YR_IA	-0.0045	-1.496	31066	31346	604314
Mbuti	Russia_Tagar	Guanzhuang	China_Upper_YR_IA	-0.0038	-1.491	30806	31044	617794
Mbuti	Ami	Guanzhuang	China_Upper_YR_IA	-0.0044	-1.48	31464	31745	604298
Mbuti	Russia_Shamanka_EBA	Guanzhuang	China_Upper_YR_IA	-0.0045	-1.48	29280	29548	569400
Mbuti	Mixe	Guanzhuang	China_Upper_YR_IA	-0.0043	-1.475	30958	31224	604345
Mbuti	China_YR_LBIA	Guanzhuang	China_Upper_YR_IA	-0.0039	-1.472	32031	32283	613511
Mbuti	Tujia	Guanzhuang	China_Upper_YR_IA	-0.0034	-1.47	32395	32615	620477
Mbuti	Koryak	Guanzhuang	China_Upper_YR_IA	-0.0048	-1.456	32061	32370	620458
Mbuti	Russia_KolymaRiver_LN_1d	Guanzhuang	China_Upper_YR_IA	-0.0074	-1.445	11719	11894	226404
Mbuti	Hungarian	Guanzhuang	China_Upper_YR_IA	-0.004	-1.437	29793	30035	604291
Mbuti	Dungan	Guanzhuang	China_Upper_YR_IA	-0.0044	-1.433	32123	32405	620315
Mbuti	Chechen	Guanzhuang	China_Upper_YR_IA	-0.0047	-1.423	29673	29952	602913
Mbuti	Shenxian	Guanzhuang	China_Upper_YR_IA	-0.0065	-1.404	14724	14917	291827
Mbuti	Russia_Shamanka_Eneolithic	Guanzhuang	China_Upper_YR_IA	-0.0035	-1.392	32215	32444	620414
Mbuti	Kyrgyzstan_TianShan_Hun	Guanzhuang	China_Upper_YR_IA	-0.0032	-1.39	31160	31360	620386
Mbuti	Turkey_EBA_II	Guanzhuang	China_Upper_YR_IA	-0.0043	-1.38	26510	26737	548884
Mbuti	Russia_CentralYakutia_LN	Guanzhuang	China_Upper_YR_IA	-0.005	-1.377	31110	31421	601028
Mbuti	GaoHuaHua	Guanzhuang	China_Upper_YR_IA	-0.0045	-1.363	25766	25997	499834
Mbuti	Germany_EBA_Unetice	Guanzhuang	China_Upper_YR_IA	-0.0041	-1.347	26978	27198	550016
Mbuti	Vietnam_LN	Guanzhuang	China_Upper_YR_IA	-0.0064	-1.34	10082	10211	202049
Mbuti	Tonga_2700BP	Guanzhuang	China_Upper_YR_IA	-0.0107	-1.337	3957	4043	79280
Mbuti	Kazakhstan_Kumsay_EBA	Guanzhuang	China_Upper_YR_IA	-0.0044	-1.329	23606	23812	475778
Mbuti	Kazakhstan_Turk	Guanzhuang	China_Upper_YR_IA	-0.0045	-1.321	28088	28341	561007
Mbuti	Russia_Krasnoyarsk_BA	Guanzhuang	China_Upper_YR_IA	-0.0048	-1.304	31982	32289	620163
Mbuti	Xitoucun	Guanzhuang	China_Upper_YR_IA	-0.0058	-1.3	12163	12305	242603
Mbuti	Sherpa	Guanzhuang	China_Upper_YR_IA	-0.004	-1.294	31357	31607	604313
Mbuti	Tu	Guanzhuang	China_Upper_YR_IA	-0.0029	-1.274	32261	32449	620477
Mbuti	Ulchi	Guanzhuang	China_Upper_YR_IA	-0.0036	-1.272	31319	31545	604291
Mbuti	Russia_Samara_EBA_Yamnaya_published2	Guanzhuang	China_Upper_YR_IA	-0.0046	-1.261	27881	28138	567601
Mbuti	Greece_BA_Mycenaean	Guanzhuang	China_Upper_YR_IA	-0.0052	-1.26	10078	10183	226944
Mbuti	Vietnam_N	Guanzhuang	China_Upper_YR_IA	-0.0084	-1.256	5116	5203	100689
Mbuti	Russia_UstIda_LN	Guanzhuang	China_Upper_YR_IA	-0.0037	-1.253	29275	29495	572583
Mbuti	Russia_IA_2	Guanzhuang	China_Upper_YR_IA	-0.0051	-1.244	21341	21560	425900
Mbuti	China_Shimao_LN	Guanzhuang	China_Upper_YR_IA	-0.0037	-1.243	31944	32184	611091
Mbuti	Russian	Guanzhuang	China_Upper_YR_IA	-0.0034	-1.225	29983	30186	604327
Mbuti	Mongolia_Uvurkhangai_EIALatEMedieval	Guanzhuang	China_Upper_YR_IA	-0.004	-1.223	25449	25655	496261
Mbuti	Hazara	Guanzhuang	China_Upper_YR_IA	-0.0034	-1.209	30596	30803	604274
Mbuti	Russia_AfontovaGora3	Guanzhuang	China_Upper_YR_IA	-0.0085	-1.209	5033	5119	107762
Mbuti	Mongolia_Arkhangai_Xiongnu_o	Guanzhuang	China_Upper_YR_IA	-0.0049	-1.191	25061	25308	486026
Mbuti	Vietnam_BA_DongSonCulture	Guanzhuang	China_Upper_YR_IA	-0.0054	-1.189	10177	10288	211800
Mbuti	China_Upper_YR_LN	Guanzhuang	China_Upper_YR_IA	-0.0032	-1.188	32137	32345	613955
Mbuti	China_YR_MN	Guanzhuang	China_Upper_YR_IA	-0.0034	-1.184	32120	32340	615091
Mbuti	Mongolia_Arkhangai_XiongnuEarlyMedieval_3	Guanzhuang	China_Upper_YR_IA	-0.003	-1.176	30853	31040	604144
Mbuti	Tanshishan	Guanzhuang	China_Upper_YR_IA	-0.0066	-1.17	8272	8383	164870
Mbuti	Kazakhstan_Kimak	Guanzhuang	China_Upper_YR_IA	-0.0073	-1.159	5877	5963	117137
Mbuti	Russia_Ust_Ishim	Guanzhuang	China_Upper_YR_IA	-0.0038	-1.116	27801	28011	568420
Mbuti	Vietnam_N_published	Guanzhuang	China_Upper_YR_IA	-0.012	-1.094	2002	2050	40471
Mbuti	Madiga	Guanzhuang	China_Upper_YR_IA	-0.0028	-1.078	30046	30215	604321
Mbuti	Mongolia_Xiongnu_o2	Guanzhuang	China_Upper_YR_IA	-0.0037	-1.059	28405	28617	569401
Mbuti	Yi	Guanzhuang	China_Upper_YR_IA	-0.0031	-1.057	31501	31697	604311
Mbuti	Papuan	Guanzhuang	China_Upper_YR_IA	-0.0028	-1.053	30058	30227	604360
Mbuti	Oroqen	Guanzhuang	China_Upper_YR_IA	-0.0029	-1.034	31370	31553	604298
Mbuti	China_SEastAsia_Coastal_LN	Guanzhuang	China_Upper_YR_IA	-0.0041	-1.028	14966	15088	295905
Mbuti	Basque	Guanzhuang	China_Upper_YR_IA	-0.0029	-1.026	29728	29898	604317
Mbuti	Nepal_Mebrak_2125BP	Guanzhuang	China_Upper_YR_IA	-0.0042	-1.025	20385	20557	393117
Mbuti	Kazakhstan_ZevakinoChilikta_IA_2	Guanzhuang	China_Upper_YR_IA	-0.0058	-1.019	7903	7995	158610
Mbuti	Mansi	Guanzhuang	China_Upper_YR_IA	-0.0027	-1.014	30589	30757	604327
Mbuti	Brahmin	Guanzhuang	China_Upper_YR_IA	-0.0027	-1.012	29904	30064	604321
Mbuti	Even	Guanzhuang	China_Upper_YR_IA	-0.0029	-1.007	31281	31464	604333
Mbuti	Liangdao1	Guanzhuang	China_Upper_YR_IA	-0.0059	-0.997	8300	8399	171262
Mbuti	Italy_Sicily_HG_OrienteC	Guanzhuang	China_Upper_YR_IA	-0.0129	-0.991	1310	1345	26792
Mbuti	Mongolia_Sukhbaatar_MLBA	Guanzhuang	China_Upper_YR_IA	-0.0048	-0.99	14931	15076	291354
Mbuti	Taiwan_Hanben_IA	Guanzhuang	China_Upper_YR_IA	-0.0025	-0.989	31935	32093	612643
Mbuti	China_YR_LN	Guanzhuang	China_Upper_YR_IA	-0.0025	-0.983	32427	32590	619298
Mbuti	Lemande	Guanzhuang	China_Upper_YR_IA	-0.0024	-0.983	24374	24490	604297
Mbuti	Bulgarian	Guanzhuang	China_Upper_YR_IA	-0.0027	-0.982	29700	29861	604228
Mbuti	Aleut	Guanzhuang	China_Upper_YR_IA	-0.0028	-0.975	30678	30847	604339
Mbuti	LaCen	Guanzhuang	China_Upper_YR_IA	-0.0037	-0.949	19705	19852	386745
Mbuti	Samaritan	Guanzhuang	China_Upper_YR_IA	-0.0032	-0.947	29241	29428	600872
Mbuti	Hezhen	Guanzhuang	China_Upper_YR_IA	-0.0027	-0.945	31356	31526	604324
Mbuti	Russia_AfontovaGora2	Guanzhuang	China_Upper_YR_IA	-0.0113	-0.941	1644	1681	33649
Mbuti	Mongolia_Uvurkhangai_Xiongnu	Guanzhuang	China_Upper_YR_IA	-0.0032	-0.936	26817	26988	520870
Mbuti	Mexico_Zapotec	Guanzhuang	China_Upper_YR_IA	-0.0027	-0.916	31018	31188	604283
Mbuti	Daur	Guanzhuang	China_Upper_YR_IA	-0.0031	-0.899	31326	31521	602814
Mbuti	Russia_MBA_Poltavka	Guanzhuang	China_Upper_YR_IA	-0.0031	-0.878	22782	22924	463406
Mbuti	Kazakhstan_Kangju_o1	Guanzhuang	China_Upper_YR_IA	-0.0033	-0.872	19523	19653	398572
Mbuti	China_SEastAsia_Coastal_EN	Guanzhuang	China_Upper_YR_IA	-0.0054	-0.866	6362	6432	129160
Mbuti	Palestinian	Guanzhuang	China_Upper_YR_IA	-0.0021	-0.853	29263	29388	604353
Mbuti	Russia_AginBuryat_N	Guanzhuang	China_Upper_YR_IA	-0.004	-0.834	10830	10917	209573
Mbuti	Russia_Karasuk_oRISE	Guanzhuang	China_Upper_YR_IA	-0.0021	-0.833	31029	31160	618353
Mbuti	Russia_Afanasievo	Guanzhuang	China_Upper_YR_IA	-0.002	-0.824	29786	29908	600040
Mbuti	Kazakhstan_GoldenHordeAsian	Guanzhuang	China_Upper_YR_IA	-0.003	-0.82	30361	30541	586387
Mbuti	Vietnam_N_all_published	Guanzhuang	China_Upper_YR_IA	-0.008	-0.808	2410	2449	48413
Mbuti	Russia_SaltovoMayaki	Guanzhuang	China_Upper_YR_IA	-0.0076	-0.803	2145	2177	46682
Mbuti	Mongola	Guanzhuang	China_Upper_YR_IA	-0.0023	-0.791	31383	31528	604319
Mbuti	Kazakhstan_Nomad_IA_o	Guanzhuang	China_Upper_YR_IA	-0.0044	-0.785	7548	7614	153878
Mbuti	China_Miaozigou_MN	Guanzhuang	China_Upper_YR_IA	-0.0042	-0.775	8959	9035	173289
Mbuti	Nepal_Samdzong_1500BP	Guanzhuang	China_Upper_YR_IA	-0.0021	-0.771	32214	32353	620055
Mbuti	China_Wuzhuangguoliang_LN	Guanzhuang	China_Upper_YR_IA	-0.0087	-0.77	1258	1280	25111
Mbuti	Kongo	Guanzhuang	China_Upper_YR_IA	-0.002	-0.768	24150	24246	602611
Mbuti	Russia_Alan	Guanzhuang	China_Upper_YR_IA	-0.0021	-0.764	30435	30561	616379
Mbuti	Cretan	Guanzhuang	China_Upper_YR_IA	-0.0021	-0.758	29657	29782	604277
Mbuti	Mongolia_Sukhbaatar_LatEMedieval	Guanzhuang	China_Upper_YR_IA	-0.0019	-0.751	31810	31928	611624
Mbuti	Georgia_Kotias	Guanzhuang	China_Upper_YR_IA	-0.0026	-0.719	30484	30644	620066
Mbuti	Mongolia_Dundgobi_LatEMedieval	Guanzhuang	China_Upper_YR_IA	-0.0029	-0.708	20591	20710	401578
Mbuti	Vietnam_BA_all	Guanzhuang	China_Upper_YR_IA	-0.0037	-0.706	11006	11087	214051
Mbuti	Kazakhstan_Nomad_IA	Guanzhuang	China_Upper_YR_IA	-0.0025	-0.705	21178	21286	425363
Mbuti	Mongolia_Khentii_EIA_SlabGrave	Guanzhuang	China_Upper_YR_IA	-0.0062	-0.692	3110	3148	61346
Mbuti	Hawaiian	Guanzhuang	China_Upper_YR_IA	-0.0022	-0.673	31130	31269	602443
Mbuti	Russia_Samara_EBA_Yamnaya_published	Guanzhuang	China_Upper_YR_IA	-0.0031	-0.66	13883	13969	286824
Mbuti	Mongolia_LBA_CenterWest_4_o	Guanzhuang	China_Upper_YR_IA	-0.0027	-0.656	19331	19437	376615
Mbuti	Turkmenistan_C_Namazga	Guanzhuang	China_Upper_YR_IA	-0.0025	-0.647	17106	17193	358298
Mbuti	Malaysia_historical	Guanzhuang	China_Upper_YR_IA	-0.0045	-0.639	5165	5213	100679
Mbuti	Balochi	Guanzhuang	China_Upper_YR_IA	-0.0017	-0.636	29769	29870	604263
Mbuti	Laos_Hoabinhian	Guanzhuang	China_Upper_YR_IA	-0.003	-0.635	13122	13200	268077
Mbuti	Moldova_Cimmerian	Guanzhuang	China_Upper_YR_IA	-0.0023	-0.63	20652	20746	413002
Mbuti	Chipewyan	Guanzhuang	China_Upper_YR_IA	-0.0019	-0.623	31106	31223	604316
Mbuti	Cree1	Guanzhuang	China_Upper_YR_IA	-0.002	-0.621	30610	30735	603159
Mbuti	Shandong_EN	Guanzhuang	China_Upper_YR_IA	-0.002	-0.615	24623	24722	477494
Mbuti	Kazakhstan_Wusun	Guanzhuang	China_Upper_YR_IA	-0.0021	-0.611	27735	27849	559731
Mbuti	Uyghur	Guanzhuang	China_Upper_YR_IA	-0.0017	-0.609	30613	30717	604313
Mbuti	Brahui	Guanzhuang	China_Upper_YR_IA	-0.0017	-0.596	29646	29745	604303
Mbuti	Turkmenistan_C_Namazga_1d	Guanzhuang	China_Upper_YR_IA	-0.0089	-0.592	1032	1051	21989
Mbuti	Russia_UstIda_EBA	Guanzhuang	China_Upper_YR_IA	-0.0019	-0.585	23930	24023	468650
Mbuti	Piapoco	Guanzhuang	China_Upper_YR_IA	-0.0018	-0.584	31064	31175	604263
Mbuti	Altaian	Guanzhuang	China_Upper_YR_IA	-0.0019	-0.579	30967	31084	603240
Mbuti	Russia_Tuva_IA_AldyBel	Guanzhuang	China_Upper_YR_IA	-0.0023	-0.574	19180	19268	386176
Mbuti	Kyrgyzstan_Medieval_Nomad_o	Guanzhuang	China_Upper_YR_IA	-0.0026	-0.558	13047	13115	256730
Mbuti	Russia_Samara_EBA_Yamnaya	Guanzhuang	China_Upper_YR_IA	-0.0015	-0.554	28710	28794	581529
Mbuti	Russia_Siberia_Tenisei_EBA	Guanzhuang	China_Upper_YR_IA	-0.0023	-0.547	19196	19286	379690
Mbuti	Vanuatu_2900BP_all	Guanzhuang	China_Upper_YR_IA	-0.0041	-0.538	4684	4722	91447
Mbuti	Russia_NorthOssetian	Guanzhuang	China_Upper_YR_IA	-0.0015	-0.536	29895	29982	604337
Mbuti	Kazakhstan_Karluk_1	Guanzhuang	China_Upper_YR_IA	-0.002	-0.532	29299	29415	576697
Mbuti	Kazakhstan_Nomad_Hun_Sarmatian	Guanzhuang	China_Upper_YR_IA	-0.0019	-0.531	27194	27296	528806
Mbuti	Russia_AngaraRiver_EN	Guanzhuang	China_Upper_YR_IA	-0.002	-0.531	30294	30417	585414
Mbuti	Turkey_N	Guanzhuang	China_Upper_YR_IA	-0.0013	-0.515	29856	29937	607133
Mbuti	Spain_HG	Guanzhuang	China_Upper_YR_IA	-0.002	-0.511	24868	24969	504252
Mbuti	Kashmiri_Pandit	Guanzhuang	China_Upper_YR_IA	-0.0017	-0.503	29851	29950	603053
Mbuti	Russia_KuengaRiver_N_2	Guanzhuang	China_Upper_YR_IA	-0.0019	-0.502	28884	28993	553725
Mbuti	Sardinian	Guanzhuang	China_Upper_YR_IA	-0.0013	-0.501	29733	29812	604352
Mbuti	BedouinB	Guanzhuang	China_Upper_YR_IA	-0.0014	-0.498	29258	29339	604274
Mbuti	Eskimo_Naukan	Guanzhuang	China_Upper_YR_IA	-0.0015	-0.498	31172	31266	604308
Mbuti	Thailand_IA	Guanzhuang	China_Upper_YR_IA	-0.0045	-0.491	3016	3043	59271
Mbuti	Naxi	Guanzhuang	China_Upper_YR_IA	-0.0013	-0.479	31567	31647	604348
Mbuti	Quechua	Guanzhuang	China_Upper_YR_IA	-0.0014	-0.459	31072	31157	604297
Mbuti	Yadava	Guanzhuang	China_Upper_YR_IA	-0.0012	-0.442	30055	30128	604301
Mbuti	Moldova_Glinoe_Scythian	Guanzhuang	China_Upper_YR_IA	-0.0012	-0.421	29258	29328	589756
Mbuti	Germany_CordedWare	Guanzhuang	China_Upper_YR_IA	-0.0012	-0.409	29369	29437	593013
Mbuti	Kazakhstan_Berel_IA_o3	Guanzhuang	China_Upper_YR_IA	-0.0012	-0.408	30248	30318	585239
Mbuti	Kazakhstan_Central_Saka	Guanzhuang	China_Upper_YR_IA	-0.0011	-0.406	30116	30184	594743
Mbuti	Karitiana	Guanzhuang	China_Upper_YR_IA	-0.0012	-0.388	31156	31232	604337
Mbuti	Russia_Chita_BA	Guanzhuang	China_Upper_YR_IA	-0.0028	-0.384	4662	4688	90595
Mbuti	Buryat	Guanzhuang	China_Upper_YR_IA	-0.001	-0.365	32136	32197	620478
Mbuti	Tuscan_1	Guanzhuang	China_Upper_YR_IA	-0.001	-0.359	29798	29858	604304
Mbuti	Estonia_CordedWare	Guanzhuang	China_Upper_YR_IA	-0.0011	-0.356	26678	26738	543408
Mbuti	Russia_MA1_HG	Guanzhuang	China_Upper_YR_IA	-0.0014	-0.35	20991	21051	422786
Mbuti	Estonian	Guanzhuang	China_Upper_YR_IA	-0.001	-0.345	29959	30017	604320
Mbuti	Bergamo	Guanzhuang	China_Upper_YR_IA	-0.0011	-0.339	29728	29796	602858
Mbuti	Bougainville	Guanzhuang	China_Upper_YR_IA	-0.001	-0.333	30356	30415	604092
Mbuti	BaBanQinCen	Guanzhuang	China_Upper_YR_IA	-0.0012	-0.325	17356	17399	339595
Mbuti	Kalash	Guanzhuang	China_Upper_YR_IA	-0.0009	-0.322	29951	30006	604318
Mbuti	Tubalar	Guanzhuang	China_Upper_YR_IA	-0.0009	-0.32	30819	30872	604332
Mbuti	Georgian	Guanzhuang	China_Upper_YR_IA	-0.0008	-0.31	29707	29757	604327
Mbuti	Kusunda	Guanzhuang	China_Upper_YR_IA	-0.0009	-0.299	30836	30893	604265
Mbuti	Sweden_Motala_HG	Guanzhuang	China_Upper_YR_IA	-0.0009	-0.286	26905	26953	544491
Mbuti	Turkmenistan_Gonur_BA_1	Guanzhuang	China_Upper_YR_IA	-0.0008	-0.283	22993	23031	470778
Mbuti	Bengali	Guanzhuang	China_Upper_YR_IA	-0.0007	-0.276	30184	30226	604294
Mbuti	Dushan	Guanzhuang	China_Upper_YR_IA	-0.0013	-0.276	12441	12474	249271
Mbuti	Chane	Guanzhuang	China_Upper_YR_IA	-0.0009	-0.274	31078	31137	603469
Mbuti	Kazakhstan_Wusun_LateSaka_dup	Guanzhuang	China_Upper_YR_IA	-0.0016	-0.264	6432	6453	128813
Mbuti	Russia_Buryatia_Xiongnu_mother	Guanzhuang	China_Upper_YR_IA	-0.0012	-0.262	18224	18266	353710
Mbuti	Mongolia_Khentii_Xiongnu	Guanzhuang	China_Upper_YR_IA	-0.001	-0.25	23269	23316	451181
Mbuti	Pathan	Guanzhuang	China_Upper_YR_IA	-0.0007	-0.239	29940	29979	604326
Mbuti	Mala	Guanzhuang	China_Upper_YR_IA	-0.0006	-0.223	30110	30144	604344
Mbuti	Punjabi	Guanzhuang	China_Upper_YR_IA	-0.0006	-0.214	30077	30110	604362
Mbuti	Kapu	Guanzhuang	China_Upper_YR_IA	-0.0006	-0.212	30154	30189	604314
Mbuti	Adygei	Guanzhuang	China_Upper_YR_IA	-0.0006	-0.21	29868	29904	604297
Mbuti	China_AR_EN	Guanzhuang	China_Upper_YR_IA	-0.0011	-0.209	9383	9403	182724
Mbuti	Armenian	Guanzhuang	China_Upper_YR_IA	-0.0006	-0.207	29721	29756	604310
Mbuti	Yakut	Guanzhuang	China_Upper_YR_IA	-0.0006	-0.206	31283	31319	604296
Mbuti	Vanuatu_3000BP	Guanzhuang	China_Upper_YR_IA	-0.0019	-0.204	2810	2820	54989
Mbuti	Spanish	Guanzhuang	China_Upper_YR_IA	-0.0006	-0.201	29728	29762	604265
Mbuti	Turkish	Guanzhuang	China_Upper_YR_IA	-0.0005	-0.201	29807	29839	604324
Mbuti	Mongolia_Selenge_XiongnuMedieval_o1	Guanzhuang	China_Upper_YR_IA	-0.0012	-0.197	7372	7389	143789
Mbuti	Mongolia_Dornod_LatEMedieval	Guanzhuang	China_Upper_YR_IA	-0.0005	-0.193	30338	30370	586498
Mbuti	Mongolia_IA_Xianbei	Guanzhuang	China_Upper_YR_IA	-0.0008	-0.189	19151	19182	374779
Mbuti	Vietnam_historical	Guanzhuang	China_Upper_YR_IA	-0.0011	-0.178	7168	7183	137864
Mbuti	Mongolia_Umungobi_LatEMedieval	Guanzhuang	China_Upper_YR_IA	-0.0005	-0.172	28694	28721	557300
Mbuti	Mongolia_Bulgan_EarlyMedieval	Guanzhuang	China_Upper_YR_IA	-0.0007	-0.169	22347	22378	435144
Mbuti	Tajik	Guanzhuang	China_Upper_YR_IA	-0.0004	-0.144	29943	29966	604329
Mbuti	Guanzhuang_o1	Guanzhuang	China_Upper_YR_IA	-0.0025	-0.144	687	691	12913
Mbuti	Surui	Guanzhuang	China_Upper_YR_IA	-0.0004	-0.133	31191	31217	604273
Mbuti	Lezgin	Guanzhuang	China_Upper_YR_IA	-0.0003	-0.123	29786	29806	604331
Mbuti	Mongolia_Bulgan_EarlyMedievalLatEMedieval	Guanzhuang	China_Upper_YR_IA	-0.0003	-0.119	30322	30342	586449
Mbuti	Icelandic	Guanzhuang	China_Upper_YR_IA	-0.0003	-0.116	29965	29985	604323
Mbuti	Vanuatu_2900BP	Guanzhuang	China_Upper_YR_IA	-0.001	-0.112	3151	3157	61603
Mbuti	Mongolia_Arkhangai_MLBAtoEIAorMedieval_o	Guanzhuang	China_Upper_YR_IA	-0.0008	-0.111	5011	5019	97279
Mbuti	Russia_CentralYakutia_IA	Guanzhuang	China_Upper_YR_IA	-0.0011	-0.11	2133	2137	40412
Mbuti	Kazakhstan_Kipchak1	Guanzhuang	China_Upper_YR_IA	-0.0004	-0.108	20736	20754	417236
Mbuti	Russia_Siberia_Lena_EBA_o	Guanzhuang	China_Upper_YR_IA	-0.0011	-0.097	1669	1673	33387
Mbuti	Philippines_RedSlippedPottery	Guanzhuang	China_Upper_YR_IA	-0.0017	-0.084	559	561	11052
Mbuti	Mongolia_Dornod_PreBronze	Guanzhuang	China_Upper_YR_IA	-0.0006	-0.08	4584	4590	89765
Mbuti	French	Guanzhuang	China_Upper_YR_IA	-0.0002	-0.074	29936	29948	604357
Mbuti	Relli_1	Guanzhuang	China_Upper_YR_IA	-0.0002	-0.071	30174	30188	603728
Mbuti	Russia_KuengaRiver_N_1	Guanzhuang	China_Upper_YR_IA	-0.0007	-0.069	2141	2144	41471
Mbuti	Yiyang	Guanzhuang	China_Upper_YR_IA	-0.0003	-0.047	5741	5745	114481
Mbuti	Mongolia_Tuv_Xiongnu	Guanzhuang	China_Upper_YR_IA	-0.0002	-0.045	26863	26872	517822
Mbuti	Jordanian	Guanzhuang	China_Upper_YR_IA	-0.0001	-0.024	29378	29382	604357
Mbuti	Russia_Srubnaya	Guanzhuang	China_Upper_YR_IA	0	-0.018	29795	29798	600319
Mbuti	Taiwan_Hanben_IA_lc	Guanzhuang	China_Upper_YR_IA	-0.0001	-0.01	1728	1728	34077
Mbuti	Mongolia_Selenge_Xiongnu	Guanzhuang	China_Upper_YR_IA	0	-0.009	23671	23672	454813
Mbuti	Turkey_MLBA_AssyrianColonyPeriod	Guanzhuang	China_Upper_YR_IA	0	-0.007	19527	19528	400342
Mbuti	China_SEastAsia_Island_EN	Guanzhuang	China_Upper_YR_IA	0	-0.003	22476	22477	442657
Mbuti	Eskimo_Chaplin	Guanzhuang	China_Upper_YR_IA	0	0.005	31272	31270	603734
Mbuti	Slovakia_Poprad	Guanzhuang	China_Upper_YR_IA	0	0.006	12799	12798	260102
Mbuti	Albanian	Guanzhuang	China_Upper_YR_IA	0	0.008	29814	29812	603646
Mbuti	Russia_EarlyMedieval_Heshui_Mohe_1	Guanzhuang	China_Upper_YR_IA	0.0001	0.011	6158	6157	119917
Mbuti	China_AmurRiver_BA	Guanzhuang	China_Upper_YR_IA	0.0009	0.035	434	433	8113
Mbuti	Mongolia_Ulaanbaatar_EIALatEMedieval	Guanzhuang	China_Upper_YR_IA	0.0003	0.051	12232	12226	238353
Mbuti	Boshan	Guanzhuang	China_Upper_YR_IA	0.0002	0.057	24756	24745	482918
Mbuti	China_AR_IA	Guanzhuang	China_Upper_YR_IA	0.0009	0.073	1422	1419	28283
Mbuti	Jew_Yemenite	Guanzhuang	China_Upper_YR_IA	0.0003	0.089	29371	29357	604306
Mbuti	Mongolia_East_N	Guanzhuang	China_Upper_YR_IA	0.0003	0.092	25704	25688	495145
Mbuti	Liangdao2	Guanzhuang	China_Upper_YR_IA	0.0004	0.096	21817	21800	429744
Mbuti	Russia_UstBelaya_Angara	Guanzhuang	China_Upper_YR_IA	0.0003	0.104	29816	29798	575930
Mbuti	China_HMMH_MN	Guanzhuang	China_Upper_YR_IA	0.0005	0.118	19757	19738	381821
Mbuti	Russia_Andronovo	Guanzhuang	China_Upper_YR_IA	0.0003	0.119	30331	30310	612370
Mbuti	Mongolia_Uvs_EIAXiongnuLateMedival	Guanzhuang	China_Upper_YR_IA	0.0003	0.128	29813	29793	591451
Mbuti	Kazakhstan_Botai_Eneolithic	Guanzhuang	China_Upper_YR_IA	0.0005	0.143	22869	22846	455899
Mbuti	Spain_ElMiron	Guanzhuang	China_Upper_YR_IA	0.0007	0.15	13119	13099	274964
Mbuti	Mayan	Guanzhuang	China_Upper_YR_IA	0.0005	0.153	31158	31129	604231
Mbuti	Polish	Guanzhuang	China_Upper_YR_IA	0.0005	0.159	29833	29801	603230
Mbuti	Canada_MDorset	Guanzhuang	China_Upper_YR_IA	0.002	0.167	1667	1660	33208
Mbuti	Mongolia_Sukhbaatar_MLBAXiongnuLatEMedieval	Guanzhuang	China_Upper_YR_IA	0.0005	0.188	31213	31184	599428
Mbuti	Russia_LBA_1	Guanzhuang	China_Upper_YR_IA	0.0023	0.2	1716	1708	34849
Mbuti	China_AmurRiver_LPaleolithic	Guanzhuang	China_Upper_YR_IA	0.0007	0.203	21486	21455	420096
Mbuti	Russia_MLBA_Sintashta	Guanzhuang	China_Upper_YR_IA	0.0005	0.212	30045	30014	604739
Mbuti	Russia_LenaRiver_EN	Guanzhuang	China_Upper_YR_IA	0.0008	0.214	27127	27083	517337
Mbuti	Georgia_Satsurblia	Guanzhuang	China_Upper_YR_IA	0.0008	0.216	22044	22007	448427
Mbuti	Kazakhstan_Korgantas_IA	Guanzhuang	China_Upper_YR_IA	0.0009	0.217	23424	23383	454026
Mbuti	Russia_Potapovka	Guanzhuang	China_Upper_YR_IA	0.0019	0.223	3540	3526	71735
Mbuti	Germany_BellBeaker	Guanzhuang	China_Upper_YR_IA	0.0006	0.225	29955	29922	603789
Mbuti	Russia_Abkhasian	Guanzhuang	China_Upper_YR_IA	0.0007	0.247	29845	29801	604311
Mbuti	Khonda_Dora	Guanzhuang	China_Upper_YR_IA	0.0008	0.252	30522	30474	603582
Mbuti	Russia_Blagovechensk_IA	Guanzhuang	China_Upper_YR_IA	0.0012	0.253	13155	13123	251018
Mbuti	Mongolia_Sukhbaatar_MLBAXiongnuLatEMedieval_sister	Guanzhuang	China_Upper_YR_IA	0.0032	0.259	1553	1543	30078
Mbuti	Mongolia_Khuvsgul_XiongnuLatEMedieval_2	Guanzhuang	China_Upper_YR_IA	0.0007	0.262	29375	29331	568556
Mbuti	Russia_Kurma_EBA	Guanzhuang	China_Upper_YR_IA	0.0011	0.274	19231	19189	374206
Mbuti	Mongolia_Khentii_Xiongnu_daughter	Guanzhuang	China_Upper_YR_IA	0.0013	0.283	15428	15388	298322
Mbuti	Spain_C	Guanzhuang	China_Upper_YR_IA	0.0007	0.286	29606	29563	598557
Mbuti	Greece_Minoan_Lassithi	Guanzhuang	China_Upper_YR_IA	0.0009	0.289	25416	25369	522136
Mbuti	Iranian	Guanzhuang	China_Upper_YR_IA	0.0008	0.292	29680	29632	604331
Mbuti	Armenia_LBA	Guanzhuang	China_Upper_YR_IA	0.0013	0.293	11880	11850	248435
Mbuti	Irula	Guanzhuang	China_Upper_YR_IA	0.0008	0.302	30108	30057	604316
Mbuti	Druze	Guanzhuang	China_Upper_YR_IA	0.0009	0.333	29557	29504	604285
Mbuti	Russia_MN_Boisman	Guanzhuang	China_Upper_YR_IA	0.001	0.358	26427	26372	510348
Mbuti	Spain_MLN	Guanzhuang	China_Upper_YR_IA	0.0009	0.36	29295	29242	592807
Mbuti	Russia_Buryatia_Xiongnu	Guanzhuang	China_Upper_YR_IA	0.0011	0.397	29057	28993	561338
Mbuti	Makrani	Guanzhuang	China_Upper_YR_IA	0.0011	0.409	29638	29570	604298
Mbuti	Russia_Buryatia_PreBronze	Guanzhuang	China_Upper_YR_IA	0.0017	0.449	21481	21409	415154
Mbuti	Mongolia_LBA_Ulaanzukh_2_dup	Guanzhuang	China_Upper_YR_IA	0.0019	0.451	21325	21245	412168
Mbuti	Russia_IA_EarlySarmatian	Guanzhuang	China_Upper_YR_IA	0.0019	0.473	18348	18280	370406
Mbuti	Iran_C_SehGabi	Guanzhuang	China_Upper_YR_IA	0.0014	0.475	25917	25846	528733
Mbuti	China_WLR_MN	Guanzhuang	China_Upper_YR_IA	0.0017	0.483	32230	32123	614609
Mbuti	Mongolia_Khovd_MLBAEarlyMedieval	Guanzhuang	China_Upper_YR_IA	0.0016	0.491	26859	26776	533240
Mbuti	Czech	Guanzhuang	China_Upper_YR_IA	0.0016	0.501	29929	29832	603142
Mbuti	China_WLR_BA_o	Guanzhuang	China_Upper_YR_IA	0.0021	0.506	21401	21311	412030
Mbuti	Ukraine_Scythian	Guanzhuang	China_Upper_YR_IA	0.0017	0.507	28982	28886	583751
Mbuti	China_NEastAsia_Coastal_EN	Guanzhuang	China_Upper_YR_IA	0.0015	0.521	27927	27841	538068
Mbuti	Mongolia_Arkhangai_XiongnuEarlyMedieval_1	Guanzhuang	China_Upper_YR_IA	0.0023	0.579	22743	22640	460202
Mbuti	Finnish	Guanzhuang	China_Upper_YR_IA	0.0016	0.597	30112	30016	604352
Mbuti	Russia_Siberia_Irkutsk_EBA	Guanzhuang	China_Upper_YR_IA	0.0021	0.599	25512	25407	492577
Mbuti	Bulgaria_BeliBreyag_EBA	Guanzhuang	China_Upper_YR_IA	0.004	0.601	5597	5552	115341
Mbuti	Bulgaria_C	Guanzhuang	China_Upper_YR_IA	0.0018	0.619	25925	25834	527734
Mbuti	China_WLR_LN	Guanzhuang	China_Upper_YR_IA	0.0022	0.634	25158	25048	481705
Mbuti	Mongolia_Khovd_MLBAXiongnuLatEMedieval	Guanzhuang	China_Upper_YR_IA	0.003	0.655	13184	13106	254684
Mbuti	Mongolia_EIA_8	Guanzhuang	China_Upper_YR_IA	0.0029	0.662	18876	18767	365228
Mbuti	Mongolia_Chalcolithic_Afanasievo_2	Guanzhuang	China_Upper_YR_IA	0.003	0.663	16942	16839	329011
Mbuti	Bulgaria_IA	Guanzhuang	China_Upper_YR_IA	0.0031	0.664	13661	13576	277433
Mbuti	Kazakhstan_IA_Saka_dup	Guanzhuang	China_Upper_YR_IA	0.0053	0.667	4079	4036	82288
Mbuti	China_AmurRiver_EarlyN	Guanzhuang	China_Upper_YR_IA	0.0027	0.678	17777	17679	346536
Mbuti	Longlin	Guanzhuang	China_Upper_YR_IA	0.0057	0.695	3852	3808	78476
Mbuti	Russia_Mezhovskaya	Guanzhuang	China_Upper_YR_IA	0.0025	0.725	26871	26739	542954
Mbuti	China_AR_Xianbei_IA	Guanzhuang	China_Upper_YR_IA	0.0042	0.736	7633	7569	147779
Mbuti	China_WLR_BA	Guanzhuang	China_Upper_YR_IA	0.0032	0.739	16155	16053	311663
Mbuti	Bulgaria_Varna_C	Guanzhuang	China_Upper_YR_IA	0.0039	0.748	9310	9237	191487
Mbuti	Mongolia_Tuv_LatEMedieval	Guanzhuang	China_Upper_YR_IA	0.0025	0.762	25964	25837	501471
Mbuti	Russia_Siberia_UP	Guanzhuang	China_Upper_YR_IA	0.0037	0.772	14396	14290	282499
Mbuti	Mongolia_Arkhangai_PreBronze	Guanzhuang	China_Upper_YR_IA	0.0035	0.843	19764	19624	380581
Mbuti	Japan_Jomon	Guanzhuang	China_Upper_YR_IA	0.0034	0.848	24987	24820	487948
Mbuti	Russia_Kalmykia_EBA_Yamnaya	Guanzhuang	China_Upper_YR_IA	0.0024	0.851	28530	28391	577350
Mbuti	Iran_GanjDareh_N	Guanzhuang	China_Upper_YR_IA	0.0025	0.855	26831	26698	548855
Mbuti	Mongolia_Khuvsgul_XiongnuLatEMedieval_1	Guanzhuang	China_Upper_YR_IA	0.0024	0.861	27639	27505	548464
Mbuti	Sindhi_Pakistan	Guanzhuang	China_Upper_YR_IA	0.0024	0.882	30075	29930	604290
Mbuti	China_AmurRiver_N	Guanzhuang	China_Upper_YR_IA	0.0031	0.895	20686	20560	402413
Mbuti	Myanmar_LN_BA_published_lc	Guanzhuang	China_Upper_YR_IA	0.0238	0.901	320	305	6287
Mbuti	Taiwan_Gongguan	Guanzhuang	China_Upper_YR_IA	0.0043	0.909	15702	15567	303771
Mbuti	Nahua	Guanzhuang	China_Upper_YR_IA	0.0029	0.916	31152	30970	603641
Mbuti	Armenia_EBA	Guanzhuang	China_Upper_YR_IA	0.0028	0.927	25364	25223	516548
Mbuti	Canada_LateDorset	Guanzhuang	China_Upper_YR_IA	0.0063	1.046	7325	7234	143226
Mbuti	Russia_IA_Yankovsky	Guanzhuang	China_Upper_YR_IA	0.005	1.073	15444	15290	297091
Mbuti	Armenia_C	Guanzhuang	China_Upper_YR_IA	0.0032	1.089	26161	25996	531702
Mbuti	Mongolia_EIA_SlabGrave_1	Guanzhuang	China_Upper_YR_IA	0.0029	1.126	30605	30430	586284
Mbuti	Greece_Minoan_Odigitria	Guanzhuang	China_Upper_YR_IA	0.0073	1.167	5868	5783	119630
Mbuti	Italy_North_Villabruna_HG	Guanzhuang	China_Upper_YR_IA	0.005	1.186	20758	20550	422345
Mbuti	Germany_EN_LBK	Guanzhuang	China_Upper_YR_IA	0.0032	1.232	29668	29480	600946
Mbuti	Mongolia_Khentii_LatEMedieval	Guanzhuang	China_Upper_YR_IA	0.0041	1.282	25747	25534	497468
Mbuti	Spain_EN	Guanzhuang	China_Upper_YR_IA	0.0038	1.29	26915	26713	549637
Mbuti	Israel_Natufian_published	Guanzhuang	China_Upper_YR_IA	0.01	1.308	3959	3881	81396
Mbuti	Kazakhstan_IA_Berel_Pazyryk	Guanzhuang	China_Upper_YR_IA	0.0043	1.324	27857	27620	546585
Mbuti	Mongolia_North_N	Guanzhuang	China_Upper_YR_IA	0.0042	1.43	28386	28148	546804
Mbuti	Mongolia_Arkhangai_XiongnuEarlyMedieval_2	Guanzhuang	China_Upper_YR_IA	0.0054	1.467	21084	20860	425445
Mbuti	Mongolia_EIA_Xiongnu_7	Guanzhuang	China_Upper_YR_IA	0.0065	1.52	18801	18557	362301
Mbuti	Pakistan_Loebanr_IA	Guanzhuang	China_Upper_YR_IA	0.0036	1.537	29435	29224	592151
Mbuti	Mongolia_Chalcolithic_Afanasievo_1	Guanzhuang	China_Upper_YR_IA	0.0065	1.583	17869	17637	360327
Mbuti	Mongolia_EBA_Ulgii_1_dup	Guanzhuang	China_Upper_YR_IA	0.0062	1.605	25465	25153	494465
Mbuti	Mongolia_LBA_Ulaanzukh_2	Guanzhuang	China_Upper_YR_IA	0.006	1.71	22862	22588	440743
Mbuti	China_AmurRiver_Mesolithic	Guanzhuang	China_Upper_YR_IA	0.0065	1.743	16123	15913	312588
Mbuti	Greenland_Saqqaq	Guanzhuang	China_Upper_YR_IA	0.0067	1.764	28959	28576	559264
Mbuti	Kurumba	Guanzhuang	China_Upper_YR_IA	0.0059	1.804	30129	29779	600986
Mbuti	China_NEastAsia_Inland_EN	Guanzhuang	China_Upper_YR_IA	0.0082	1.89	20217	19888	393855
Mbuti	Yumin	Guanzhuang	China_Upper_YR_IA	0.0082	1.89	20217	19888	393855
Mbuti	Jordan_EBA	Guanzhuang	China_Upper_YR_IA	0.0064	1.915	19848	19594	407453
Mbuti	Israel_C	Guanzhuang	China_Upper_YR_IA	0.0054	1.943	26887	26599	548822
Mbuti	Mongolia_Arkhangai_EarlyMedieval	Guanzhuang	China_Upper_YR_IA	0.0053	2.066	30283	29965	603687
Mbuti	Mongolia_EBA_Chemurchek_2	Guanzhuang	China_Upper_YR_IA	0.0075	2.119	22206	21875	445246
Mbuti	Jordan_PPNB_published	Guanzhuang	China_Upper_YR_IA	0.0194	2.241	3300	3175	67103
Mbuti	Kazakhstan_TianShan_Saka	Guanzhuang	China_Upper_YR_IA	0.0312	2.937	2049	1925	40774

## Sheet: G
Table S2G. f4(Mbuti, Reference; X, Guanzhuang) to evaluate the genetic divergence between the Guanzhuang population and population X. The 'Reference' group consists of 287 ancient and contemporary populations, while population X includes ancient populations from various regions of East Asia. |Z|>3 indicates the significant values, highlighted in Datas by blue (positive) and red (negative) ; 2<|Z|…
f4(Mbuti, Reference; Guanzhuang, China_Upper_YR_LN)
pop1	pop2	pop3	pop4	f4	Z	ABAB	ABBA	SNPs
Mbuti	CHS	Guanzhuang	China_Upper_YR_LN	-0.013	-6.457	33708	34594	649700
Mbuti	KHV	Guanzhuang	China_Upper_YR_LN	-0.0132	-6.443	33556	34450	649700
Mbuti	Atayal	Guanzhuang	China_Upper_YR_LN	-0.0204	-6.38	32208	33548	630212
Mbuti	CDX	Guanzhuang	China_Upper_YR_LN	-0.0128	-6.281	33568	34440	649700
Mbuti	JPT	Guanzhuang	China_Upper_YR_LN	-0.0121	-5.95	33760	34587	649700
Mbuti	China_SEastAsia_Coastal_LN	Guanzhuang	China_Upper_YR_LN	-0.0184	-5.133	15100	15665	304225
Mbuti	CHB	Guanzhuang	China_Upper_YR_LN	-0.01	-4.998	33833	34518	649700
Mbuti	Taiwan_Hanben_IA	Guanzhuang	China_Upper_YR_LN	-0.0112	-4.994	33117	33864	639999
Mbuti	Ami	Guanzhuang	China_Upper_YR_LN	-0.0133	-4.776	32610	33486	631310
Mbuti	Dusun	Guanzhuang	China_Upper_YR_LN	-0.0123	-4.687	32447	33253	631274
Mbuti	Malaysia_historical	Guanzhuang	China_Upper_YR_LN	-0.02	-4.666	14062	14636	277107
Mbuti	Kinh	Guanzhuang	China_Upper_YR_LN	-0.0118	-4.625	32596	33376	631283
Mbuti	Xitoucun	Guanzhuang	China_Upper_YR_LN	-0.0178	-4.375	12276	12722	249230
Mbuti	Dai	Guanzhuang	China_Upper_YR_LN	-0.0101	-4.348	33635	34320	649696
Mbuti	Lebanon_MBA	Guanzhuang	China_Upper_YR_LN	-0.0105	-4.329	31423	32092	643576
Mbuti	Taiwan_Liangdao_LatePaleolithic	Guanzhuang	China_Upper_YR_LN	-0.0293	-4.327	4452	4721	84455
Mbuti	RIA	Guanzhuang	China_Upper_YR_LN	-0.0089	-4.141	33336	33938	646395
Mbuti	GaoHuaHua	Guanzhuang	China_Upper_YR_LN	-0.0124	-4.087	26593	27260	518902
Mbuti	She	Guanzhuang	China_Upper_YR_LN	-0.0087	-4.048	33832	34427	649684
Mbuti	Cambodian	Guanzhuang	China_Upper_YR_LN	-0.0106	-4.031	32328	33018	631325
Mbuti	Han	Guanzhuang	China_Upper_YR_LN	-0.0096	-4.021	32784	33416	631369
Mbuti	Tonga_2500BP	Guanzhuang	China_Upper_YR_LN	-0.0256	-3.939	5373	5654	108225
Mbuti	Tanshishan	Guanzhuang	China_Upper_YR_LN	-0.0197	-3.847	8313	8646	168825
Mbuti	China_Lahu	Guanzhuang	China_Upper_YR_LN	-0.0099	-3.677	32603	33256	631305
Mbuti	LG	Guanzhuang	China_Upper_YR_LN	-0.0106	-3.603	29374	30004	567979
Mbuti	Tujia	Guanzhuang	China_Upper_YR_LN	-0.0078	-3.595	33861	34391	649685
Mbuti	Hawaiian	Guanzhuang	China_Upper_YR_LN	-0.0107	-3.584	32287	32986	629369
Mbuti	Vietnam_BA_DongSonCulture	Guanzhuang	China_Upper_YR_LN	-0.0152	-3.53	10644	10974	222521
Mbuti	Thai	Guanzhuang	China_Upper_YR_LN	-0.0092	-3.459	32437	33042	631309
Mbuti	Kazakhstan_Karakhanid	Guanzhuang	China_Upper_YR_LN	-0.0127	-3.327	17857	18318	358257
Mbuti	China_SEastAsia_Coastal_EN	Guanzhuang	China_Upper_YR_LN	-0.0185	-3.255	6416	6658	132255
Mbuti	Japanese	Guanzhuang	China_Upper_YR_LN	-0.0076	-3.152	32787	33291	631360
Mbuti	LaCen	Guanzhuang	China_Upper_YR_LN	-0.0113	-3.11	20102	20560	397924
Mbuti	Guam_LateUnai_Ritidian	Guanzhuang	China_Upper_YR_LN	-0.0268	-3.046	2723	2873	57789
Mbuti	BaBanQinCen	Guanzhuang	China_Upper_YR_LN	-0.0104	-3.031	17666	18039	349515
Mbuti	Chechen	Guanzhuang	China_Upper_YR_LN	-0.0086	-2.99	30947	31482	629859
Mbuti	China_YR_LBIA	Guanzhuang	China_Upper_YR_LN	-0.0072	-2.986	33421	33903	641323
Mbuti	ONG	Guanzhuang	China_Upper_YR_LN	-0.0081	-2.907	32428	32955	646324
Mbuti	JXNT	Guanzhuang	China_Upper_YR_LN	-0.0085	-2.844	30007	30521	577616
Mbuti	Vietnam_BA	Guanzhuang	China_Upper_YR_LN	-0.0159	-2.832	7438	7679	147468
Mbuti	Laos_BA	Guanzhuang	China_Upper_YR_LN	-0.0137	-2.719	10220	10504	203452
Mbuti	Finnish	Guanzhuang	China_Upper_YR_LN	-0.0065	-2.699	31263	31669	631369
Mbuti	Shenxian	Guanzhuang	China_Upper_YR_LN	-0.0112	-2.655	15025	15364	300150
Mbuti	China_SEastAsia_Coastal_Historic	Guanzhuang	China_Upper_YR_LN	-0.0157	-2.652	6620	6832	134600
Mbuti	Kazakhstan_Turk	Guanzhuang	China_Upper_YR_LN	-0.0083	-2.619	29352	29842	587113
Mbuti	Cretan	Guanzhuang	China_Upper_YR_LN	-0.0064	-2.554	30920	31319	631293
Mbuti	Uyghur	Guanzhuang	China_Upper_YR_LN	-0.0062	-2.546	31889	32289	631327
Mbuti	Bengali	Guanzhuang	China_Upper_YR_LN	-0.0061	-2.528	31431	31817	631311
Mbuti	Germany_EBA_Unetice	Guanzhuang	China_Upper_YR_LN	-0.0066	-2.486	27920	28291	570307
Mbuti	Sweden_Motala_HG	Guanzhuang	China_Upper_YR_LN	-0.007	-2.46	27744	28135	564525
Mbuti	Indonesia_LN_BA_IA	Guanzhuang	China_Upper_YR_LN	-0.0197	-2.399	2893	3009	58314
Mbuti	Yadava	Guanzhuang	China_Upper_YR_LN	-0.0059	-2.38	31311	31683	631310
Mbuti	Vietnam_LN	Guanzhuang	China_Upper_YR_LN	-0.0104	-2.358	10521	10743	211653
Mbuti	Makrani	Guanzhuang	China_Upper_YR_LN	-0.0058	-2.343	30827	31184	631308
Mbuti	Korean	Guanzhuang	China_Upper_YR_LN	-0.0062	-2.321	32892	33302	631331
Mbuti	English	Guanzhuang	China_Upper_YR_LN	-0.0057	-2.316	31171	31527	631323
Mbuti	Russia_Tagar	Guanzhuang	China_Upper_YR_LN	-0.0053	-2.302	32292	32634	646749
Mbuti	Orcadian	Guanzhuang	China_Upper_YR_LN	-0.006	-2.282	31171	31548	631311
Mbuti	Basque	Guanzhuang	China_Upper_YR_LN	-0.0057	-2.281	31058	31416	631328
Mbuti	Samaritan	Guanzhuang	China_Upper_YR_LN	-0.0066	-2.274	30503	30906	627714
Mbuti	Poland_Globular_Amphora_published	Guanzhuang	China_Upper_YR_LN	-0.0251	-2.273	1576	1657	33187
Mbuti	Dushan	Guanzhuang	China_Upper_YR_LN	-0.0099	-2.257	12627	12879	255822
Mbuti	Russia_EBA_o1	Guanzhuang	China_Upper_YR_LN	-0.0128	-2.252	6034	6191	124261
Mbuti	French	Guanzhuang	China_Upper_YR_LN	-0.0051	-2.219	31174	31493	631374
Mbuti	Mongolia_Xiongnu_o1	Guanzhuang	China_Upper_YR_LN	-0.0059	-2.218	33633	34034	649151
Mbuti	Tonga_2700BP	Guanzhuang	China_Upper_YR_LN	-0.0161	-2.183	4033	4165	81222
Mbuti	Sindhi_Pakistan	Guanzhuang	China_Upper_YR_LN	-0.0052	-2.137	31212	31541	631300
Mbuti	Liangdao1	Guanzhuang	China_Upper_YR_LN	-0.0113	-2.131	8434	8628	175678
Mbuti	Relli_1	Guanzhuang	China_Upper_YR_LN	-0.0063	-2.12	31416	31814	630707
Mbuti	Khonda_Dora	Guanzhuang	China_Upper_YR_LN	-0.0063	-2.087	31682	32081	630559
Mbuti	Laos_LN_BA	Guanzhuang	China_Upper_YR_LN	-0.0077	-2.077	24652	25036	480719
Mbuti	Vietnam_N_published	Guanzhuang	China_Upper_YR_LN	-0.021	-2.067	2040	2127	41544
Mbuti	Mongola	Guanzhuang	China_Upper_YR_LN	-0.0052	-2.061	32751	33095	631334
Mbuti	China_YR_LN	Guanzhuang	China_Upper_YR_LN	-0.0047	-2.041	33926	34244	647845
Mbuti	Vietnam_historical	Guanzhuang	China_Upper_YR_LN	-0.0107	-2.037	7442	7603	144175
Mbuti	USA_WA_Kennewick	Guanzhuang	China_Upper_YR_LN	-0.0076	-2.034	20320	20633	397933
Mbuti	Hungarian	Guanzhuang	China_Upper_YR_LN	-0.0051	-2.034	31155	31475	631302
Mbuti	Kyrgyzstan_TianShan_Hun	Guanzhuang	China_Upper_YR_LN	-0.0042	-2.006	32698	32972	649584
Mbuti	Hazara	Guanzhuang	China_Upper_YR_LN	-0.0049	-1.985	31946	32262	631283
Mbuti	Turkey_EBA_II	Guanzhuang	China_Upper_YR_LN	-0.0055	-1.967	27762	28067	574150
Mbuti	Taiwan_Gongguan	Guanzhuang	China_Upper_YR_LN	-0.0083	-1.956	15845	16111	311727
Mbuti	Greece_BA_Mycenaean	Guanzhuang	China_Upper_YR_LN	-0.0074	-1.907	10419	10575	234038
Mbuti	Russia_HG_Karelia	Guanzhuang	China_Upper_YR_LN	-0.0062	-1.898	26924	27260	547741
Mbuti	Punjabi	Guanzhuang	China_Upper_YR_LN	-0.0045	-1.889	31381	31662	631375
Mbuti	USA_Ancient_Beringian	Guanzhuang	China_Upper_YR_LN	-0.0062	-1.889	33357	33770	649618
Mbuti	Qihe3	Guanzhuang	China_Upper_YR_LN	-0.0076	-1.878	15708	15950	314226
Mbuti	Sardinian	Guanzhuang	China_Upper_YR_LN	-0.0045	-1.857	31008	31289	631368
Mbuti	Germany_CordedWare	Guanzhuang	China_Upper_YR_LN	-0.0045	-1.857	30516	30792	617333
Mbuti	Chukchi	Guanzhuang	China_Upper_YR_LN	-0.0055	-1.853	31955	32307	630677
Mbuti	Moldova_Glinoe_Scythian	Guanzhuang	China_Upper_YR_LN	-0.0048	-1.849	30591	30886	617615
Mbuti	Miao	Guanzhuang	China_Upper_YR_LN	-0.0049	-1.847	32924	33247	631329
Mbuti	Kapu	Guanzhuang	China_Upper_YR_LN	-0.0047	-1.846	31440	31734	631329
Mbuti	Mixe	Guanzhuang	China_Upper_YR_LN	-0.005	-1.823	32393	32719	631358
Mbuti	Mixtec_1	Guanzhuang	China_Upper_YR_LN	-0.0056	-1.794	32129	32489	629240
Mbuti	Daur	Guanzhuang	China_Upper_YR_LN	-0.0054	-1.792	32671	33025	629756
Mbuti	Bulgaria_IA	Guanzhuang	China_Upper_YR_LN	-0.0076	-1.771	13800	14013	283832
Mbuti	Bulgarian	Guanzhuang	China_Upper_YR_LN	-0.0042	-1.768	31008	31270	631234
Mbuti	Kazakhstan_Nomad_IA_o	Guanzhuang	China_Upper_YR_LN	-0.009	-1.758	7864	8006	161148
Mbuti	Russia_MLBA_Sintashta	Guanzhuang	China_Upper_YR_LN	-0.0039	-1.754	31248	31491	630494
Mbuti	Russia_BA_Okunevo	Guanzhuang	China_Upper_YR_LN	-0.0038	-1.738	32883	33133	649492
Mbuti	Vietnam_BA_all	Guanzhuang	China_Upper_YR_LN	-0.0083	-1.736	11195	11382	219937
Mbuti	Kyrgyzstan_Medieval_Nomad_o	Guanzhuang	China_Upper_YR_LN	-0.0074	-1.73	13666	13870	268610
Mbuti	Madiga	Guanzhuang	China_Upper_YR_LN	-0.0043	-1.729	31425	31698	631336
Mbuti	Brahmin	Guanzhuang	China_Upper_YR_LN	-0.0042	-1.727	31260	31522	631332
Mbuti	Xibo	Guanzhuang	China_Upper_YR_LN	-0.0038	-1.723	33882	34138	649682
Mbuti	Kazakhstan_Nomad_IA	Guanzhuang	China_Upper_YR_LN	-0.0058	-1.718	22202	22459	445051
Mbuti	Cree1	Guanzhuang	China_Upper_YR_LN	-0.0053	-1.711	31940	32279	630104
Mbuti	Burusho	Guanzhuang	China_Upper_YR_LN	-0.0043	-1.698	31370	31641	631289
Mbuti	Russia_MBA_Poltavka	Guanzhuang	China_Upper_YR_LN	-0.0055	-1.692	23488	23747	478761
Mbuti	Turkmenistan_IA	Guanzhuang	China_Upper_YR_LN	-0.0056	-1.689	26563	26862	543353
Mbuti	Tuscan_1	Guanzhuang	China_Upper_YR_LN	-0.0042	-1.688	31115	31379	631318
Mbuti	Icelandic	Guanzhuang	China_Upper_YR_LN	-0.0042	-1.688	31212	31479	631335
Mbuti	Burmese	Guanzhuang	China_Upper_YR_LN	-0.0042	-1.675	32631	32907	631331
Mbuti	Iranian	Guanzhuang	China_Upper_YR_LN	-0.0042	-1.671	30945	31206	631345
Mbuti	Kazakhstan_Kumsay_EBA	Guanzhuang	China_Upper_YR_LN	-0.0045	-1.647	24351	24574	491318
Mbuti	Spanish	Guanzhuang	China_Upper_YR_LN	-0.0041	-1.638	31024	31281	631272
Mbuti	Brahui	Guanzhuang	China_Upper_YR_LN	-0.0039	-1.574	30980	31223	631315
Mbuti	Kazakhstan_Kipchak1	Guanzhuang	China_Upper_YR_LN	-0.0055	-1.557	21713	21954	437378
Mbuti	Russia_Potapovka	Guanzhuang	China_Upper_YR_LN	-0.0117	-1.543	3556	3640	73481
Mbuti	Lezgin	Guanzhuang	China_Upper_YR_LN	-0.0038	-1.541	31095	31329	631346
Mbuti	Pathan	Guanzhuang	China_Upper_YR_LN	-0.0038	-1.539	31280	31521	631336
Mbuti	Palestinian	Guanzhuang	China_Upper_YR_LN	-0.0035	-1.532	30618	30833	631366
Mbuti	Vietnam_N_all_published	Guanzhuang	China_Upper_YR_LN	-0.0139	-1.532	2458	2527	49672
Mbuti	Taiwan_Hanben_IA_lc	Guanzhuang	China_Upper_YR_LN	-0.016	-1.522	1759	1816	34991
Mbuti	Jordanian	Guanzhuang	China_Upper_YR_LN	-0.0035	-1.52	30658	30876	631371
Mbuti	Albanian	Guanzhuang	China_Upper_YR_LN	-0.0045	-1.512	31078	31356	630611
Mbuti	Bergamo	Guanzhuang	China_Upper_YR_LN	-0.0046	-1.508	30992	31281	629793
Mbuti	Russia_Afanasievo	Guanzhuang	China_Upper_YR_LN	-0.0034	-1.505	31054	31263	625266
Mbuti	Vietnam_N	Guanzhuang	China_Upper_YR_LN	-0.0092	-1.493	5196	5292	103335
Mbuti	Thailand_IA	Guanzhuang	China_Upper_YR_LN	-0.0297	-1.472	468	497	9592
Mbuti	Russia_DevilsCave_N	Guanzhuang	China_Upper_YR_LN	-0.0041	-1.456	33885	34163	649471
Mbuti	Polish	Guanzhuang	China_Upper_YR_LN	-0.0043	-1.451	31067	31334	630183
Mbuti	Russia_Srubnaya	Guanzhuang	China_Upper_YR_LN	-0.0034	-1.445	30955	31165	625254
Mbuti	Russia_Alan	Guanzhuang	China_Upper_YR_LN	-0.0035	-1.443	31936	32162	645357
Mbuti	Russian	Guanzhuang	China_Upper_YR_LN	-0.0036	-1.443	31371	31600	631347
Mbuti	Russia_Samara_EBA_Yamnaya	Guanzhuang	China_Upper_YR_LN	-0.0035	-1.423	29839	30050	604632
Mbuti	Baojianshan	Guanzhuang	China_Upper_YR_LN	-0.0057	-1.412	19148	19367	382120
Mbuti	Eskimo_Sireniki	Guanzhuang	China_Upper_YR_LN	-0.0038	-1.397	32603	32852	631335
Mbuti	Mongolia_Dundgobi_LatEMedieval	Guanzhuang	China_Upper_YR_LN	-0.0053	-1.395	21248	21473	414591
Mbuti	Moldova_Cimmerian	Guanzhuang	China_Upper_YR_LN	-0.0046	-1.394	21655	21855	432681
Mbuti	Kazakhstan_Karluk_1	Guanzhuang	China_Upper_YR_LN	-0.0046	-1.389	30618	30903	603657
Mbuti	Russia_KuengaRiver_N_1	Guanzhuang	China_Upper_YR_LN	-0.0131	-1.382	2221	2280	43373
Mbuti	Adygei	Guanzhuang	China_Upper_YR_LN	-0.0035	-1.379	31161	31380	631309
Mbuti	Nepal_Chokhopani_2800BP	Guanzhuang	China_Upper_YR_LN	-0.0047	-1.373	33840	34160	648855
Mbuti	Dungan	Guanzhuang	China_Upper_YR_LN	-0.0036	-1.365	33785	34033	649516
Mbuti	Russia_KolymaRiver_LN	Guanzhuang	China_Upper_YR_LN	-0.0037	-1.33	33759	34008	649571
Mbuti	Irula	Guanzhuang	China_Upper_YR_LN	-0.0034	-1.33	31390	31603	631332
Mbuti	China_Tianyuan	Guanzhuang	China_Upper_YR_LN	-0.005	-1.311	21348	21561	435069
Mbuti	Vanuatu_3000BP	Guanzhuang	China_Upper_YR_LN	-0.0111	-1.31	2865	2930	56553
Mbuti	Suogang	Guanzhuang	China_Upper_YR_LN	-0.0172	-1.293	1198	1240	24924
Mbuti	China_SEastAsia_Island_LN	Guanzhuang	China_Upper_YR_LN	-0.0172	-1.293	1198	1240	24924
Mbuti	Tajik	Guanzhuang	China_Upper_YR_LN	-0.0032	-1.29	31279	31480	631340
Mbuti	Mayan	Guanzhuang	China_Upper_YR_LN	-0.0037	-1.288	32498	32737	631242
Mbuti	Turkish	Guanzhuang	China_Upper_YR_LN	-0.0032	-1.286	31133	31331	631339
Mbuti	China_SEastAsia_Island_EN	Guanzhuang	China_Upper_YR_LN	-0.0042	-1.283	23036	23232	456349
Mbuti	Russia_Karasuk_oRISE	Guanzhuang	China_Upper_YR_LN	-0.0029	-1.28	32506	32694	647013
Mbuti	Armenia_C	Guanzhuang	China_Upper_YR_LN	-0.0035	-1.278	26961	27149	551071
Mbuti	Russia_Samara_EBA_Yamnaya_published	Guanzhuang	China_Upper_YR_LN	-0.0055	-1.268	14294	14451	295932
Mbuti	Piapoco	Guanzhuang	China_Upper_YR_LN	-0.0035	-1.263	32485	32713	631276
Mbuti	Russia_NorthOssetian	Guanzhuang	China_Upper_YR_LN	-0.0031	-1.261	31261	31454	631350
Mbuti	Armenian	Guanzhuang	China_Upper_YR_LN	-0.0031	-1.259	31023	31218	631325
Mbuti	Altaian	Guanzhuang	China_Upper_YR_LN	-0.0037	-1.198	32352	32595	630170
Mbuti	Turkey_N	Guanzhuang	China_Upper_YR_LN	-0.0027	-1.182	31170	31340	633549
Mbuti	Ukraine_Scythian	Guanzhuang	China_Upper_YR_LN	-0.0034	-1.181	30223	30426	610865
Mbuti	USA_Anzick_realigned	Guanzhuang	China_Upper_YR_LN	-0.004	-1.178	33055	33322	639840
Mbuti	Russia_Samara_EBA_Yamnaya_published2	Guanzhuang	China_Upper_YR_LN	-0.0038	-1.172	29017	29237	589671
Mbuti	Russia_Tuva_IA_AldyBel	Guanzhuang	China_Upper_YR_LN	-0.0043	-1.169	19703	19872	396834
Mbuti	Russia_AfontovaGora3	Guanzhuang	China_Upper_YR_LN	-0.0073	-1.165	5170	5246	110486
Mbuti	Russia_SaltovoMayaki	Guanzhuang	China_Upper_YR_LN	-0.0107	-1.153	2244	2293	48162
Mbuti	Hungary_IA_Scythian	Guanzhuang	China_Upper_YR_LN	-0.0032	-1.14	27754	27930	565672
Mbuti	Estonian	Guanzhuang	China_Upper_YR_LN	-0.0028	-1.133	31282	31459	631334
Mbuti	Liangdao2	Guanzhuang	China_Upper_YR_LN	-0.004	-1.124	22336	22517	442912
Mbuti	Kalash	Guanzhuang	China_Upper_YR_LN	-0.0029	-1.122	31319	31503	631333
Mbuti	Myanmar_LN_BA_published_lc	Guanzhuang	China_Upper_YR_LN	-0.0275	-1.109	322	340	6491
Mbuti	Mexico_Zapotec	Guanzhuang	China_Upper_YR_LN	-0.003	-1.103	32442	32638	631292
Mbuti	Mala	Guanzhuang	China_Upper_YR_LN	-0.0026	-1.101	31473	31636	631360
Mbuti	Kazakhstan_ZevakinoChilikta_IA_2	Guanzhuang	China_Upper_YR_LN	-0.0057	-1.1	8287	8382	165014
Mbuti	Quechua	Guanzhuang	China_Upper_YR_LN	-0.003	-1.093	32488	32682	631304
Mbuti	Russia_KolymaRiver_LN_1d	Guanzhuang	China_Upper_YR_LN	-0.005	-1.082	12278	12401	236957
Mbuti	Boshan	Guanzhuang	China_Upper_YR_LN	-0.0038	-1.076	25487	25681	498191
Mbuti	China_Upper_YR_IA	Guanzhuang	China_Upper_YR_LN	-0.0029	-1.043	32137	32322	613955
Mbuti	Karitiana	Guanzhuang	China_Upper_YR_LN	-0.003	-1.042	32579	32776	631350
Mbuti	Kazakhstan_Kangju_o1	Guanzhuang	China_Upper_YR_LN	-0.0035	-1.027	20493	20637	416976
Mbuti	Turkmenistan_Gonur_BA_1	Guanzhuang	China_Upper_YR_LN	-0.0027	-1.022	23734	23864	486027
Mbuti	Estonia_CordedWare	Guanzhuang	China_Upper_YR_LN	-0.003	-1.004	27822	27988	566816
Mbuti	Mongolia_Bulgan_EarlyMedieval	Guanzhuang	China_Upper_YR_LN	-0.0035	-0.965	23034	23194	449226
Mbuti	Kashmiri_Pandit	Guanzhuang	China_Upper_YR_LN	-0.0029	-0.959	31228	31411	630022
Mbuti	Russia_UstIda_LN	Guanzhuang	China_Upper_YR_LN	-0.0027	-0.955	30768	30933	599543
Mbuti	Israel_C	Guanzhuang	China_Upper_YR_LN	-0.0023	-0.93	27680	27810	568606
Mbuti	Kazakhstan_Central_Steppe_EMBA	Guanzhuang	China_Upper_YR_LN	-0.0025	-0.93	33011	33176	649453
Mbuti	Tu	Guanzhuang	China_Upper_YR_LN	-0.0019	-0.9	33916	34042	649684
Mbuti	Aleut	Guanzhuang	China_Upper_YR_LN	-0.0022	-0.836	32114	32252	631351
Mbuti	Mongolia_Dornod_Xiongnu	Guanzhuang	China_Upper_YR_LN	-0.0031	-0.835	25431	25586	492906
Mbuti	Kazakhstan_Nomad_Hun_Sarmatian	Guanzhuang	China_Upper_YR_LN	-0.0026	-0.823	28530	28678	553341
Mbuti	Guanzhuang_o1	Guanzhuang	China_Upper_YR_LN	-0.0118	-0.798	721	739	13762
Mbuti	Jew_Yemenite	Guanzhuang	China_Upper_YR_LN	-0.002	-0.79	30651	30771	631319
Mbuti	Greece_Minoan_Odigitria	Guanzhuang	China_Upper_YR_LN	-0.0045	-0.784	5906	5959	122827
Mbuti	Turkey_MLBA_AssyrianColonyPeriod	Guanzhuang	China_Upper_YR_LN	-0.0026	-0.782	20443	20548	419083
Mbuti	Kazakhstan_Central_Saka	Guanzhuang	China_Upper_YR_LN	-0.0019	-0.771	31548	31669	622093
Mbuti	Kazakhstan_Nomad_HP	Guanzhuang	China_Upper_YR_LN	-0.0022	-0.76	32460	32601	626851
Mbuti	Georgia_Kotias	Guanzhuang	China_Upper_YR_LN	-0.0023	-0.738	32050	32200	649206
Mbuti	Mansi	Guanzhuang	China_Upper_YR_LN	-0.0018	-0.73	32074	32193	631341
Mbuti	Georgian	Guanzhuang	China_Upper_YR_LN	-0.0017	-0.718	31090	31198	631341
Mbuti	Spain_HG	Guanzhuang	China_Upper_YR_LN	-0.0025	-0.693	25812	25942	523646
Mbuti	Druze	Guanzhuang	China_Upper_YR_LN	-0.0017	-0.689	30879	30984	631293
Mbuti	Spain_MLN	Guanzhuang	China_Upper_YR_LN	-0.0016	-0.687	30459	30554	616770
Mbuti	China_Wuzhuangguoliang_LN	Guanzhuang	China_Upper_YR_LN	-0.0071	-0.685	1303	1322	25994
Mbuti	Lemande	Guanzhuang	China_Upper_YR_LN	-0.0014	-0.678	25555	25628	631310
Mbuti	Kusunda	Guanzhuang	China_Upper_YR_LN	-0.0018	-0.66	32263	32376	631268
Mbuti	China_YR_MN	Guanzhuang	China_Upper_YR_LN	-0.0017	-0.638	33747	33864	643356
Mbuti	BedouinB	Guanzhuang	China_Upper_YR_LN	-0.0016	-0.632	30615	30713	631279
Mbuti	Kazakhstan_Kimak	Guanzhuang	China_Upper_YR_LN	-0.0036	-0.622	6199	6243	122800
Mbuti	Canada_MDorset_published	Guanzhuang	China_Upper_YR_LN	-0.0059	-0.621	2639	2670	50974
Mbuti	Germany_BellBeaker	Guanzhuang	China_Upper_YR_LN	-0.0014	-0.618	31188	31273	629246
Mbuti	Russia_Abkhasian	Guanzhuang	China_Upper_YR_LN	-0.0016	-0.611	31172	31271	631323
Mbuti	Mongolia_Xiongnu_o2	Guanzhuang	China_Upper_YR_LN	-0.0019	-0.608	29862	29977	595923
Mbuti	Mongolia_Bulgan_LatEMedieval	Guanzhuang	China_Upper_YR_LN	-0.0021	-0.594	21406	21497	415012
Mbuti	Spain_ElMiron	Guanzhuang	China_Upper_YR_LN	-0.0026	-0.579	13377	13447	281908
Mbuti	Russia_Andronovo	Guanzhuang	China_Upper_YR_LN	-0.0015	-0.552	31734	31828	640452
Mbuti	Spain_C	Guanzhuang	China_Upper_YR_LN	-0.0012	-0.537	30827	30901	623284
Mbuti	Turkmenistan_C_Namazga	Guanzhuang	China_Upper_YR_LN	-0.0019	-0.529	18031	18100	375917
Mbuti	Russia_Ust_Ishim	Guanzhuang	China_Upper_YR_LN	-0.0016	-0.524	29099	29194	592760
Mbuti	Bougainville	Guanzhuang	China_Upper_YR_LN	-0.0014	-0.505	31788	31876	631082
Mbuti	Mongolia_Khentii_EIA_SlabGrave	Guanzhuang	China_Upper_YR_LN	-0.004	-0.498	3212	3238	62952
Mbuti	Vanuatu_2900BP_all	Guanzhuang	China_Upper_YR_LN	-0.0034	-0.496	4797	4830	93560
Mbuti	Russia_IA_EarlySarmatian	Guanzhuang	China_Upper_YR_LN	-0.0019	-0.495	18855	18925	383027
Mbuti	Russia_MA1_HG	Guanzhuang	China_Upper_YR_LN	-0.0019	-0.487	21964	22047	440929
Mbuti	Turkmenistan_C_Namazga_1d	Guanzhuang	China_Upper_YR_LN	-0.0059	-0.467	1098	1111	22981
Mbuti	Bulgaria_Varna_C	Guanzhuang	China_Upper_YR_LN	-0.0022	-0.46	9483	9525	196453
Mbuti	Russia_IA_2	Guanzhuang	China_Upper_YR_LN	-0.0017	-0.431	22220	22295	440918
Mbuti	Italy_Sicily_HG_OrienteC	Guanzhuang	China_Upper_YR_LN	-0.0049	-0.431	1342	1356	27514
Mbuti	Japan_Jomon	Guanzhuang	China_Upper_YR_LN	-0.0015	-0.425	26066	26147	510577
Mbuti	Italy_North_Villabruna_HG	Guanzhuang	China_Upper_YR_LN	-0.0016	-0.424	21217	21284	435009
Mbuti	Chane	Guanzhuang	China_Upper_YR_LN	-0.0013	-0.392	32556	32639	630438
Mbuti	Russia_Siberia_Tenisei_EBA	Guanzhuang	China_Upper_YR_LN	-0.0015	-0.377	19858	19917	392236
Mbuti	Kazakhstan_Wusun	Guanzhuang	China_Upper_YR_LN	-0.0011	-0.372	29172	29239	585799
Mbuti	Russia_Kalmykia_EBA_Yamnaya	Guanzhuang	China_Upper_YR_LN	-0.001	-0.37	29703	29761	601453
Mbuti	Russia_LBA_1	Guanzhuang	China_Upper_YR_LN	-0.0039	-0.366	1775	1789	36477
Mbuti	Ulchi	Guanzhuang	China_Upper_YR_LN	-0.001	-0.364	32915	32978	631302
Mbuti	China_NEastAsia_Coastal_EN	Guanzhuang	China_Upper_YR_LN	-0.0009	-0.347	28874	28929	557058
Mbuti	Shandong_EN	Guanzhuang	China_Upper_YR_LN	-0.001	-0.343	25464	25517	492978
Mbuti	Russia_CentralYakutia_LN	Guanzhuang	China_Upper_YR_LN	-0.0011	-0.337	32801	32872	629148
Mbuti	Mongolia_Selenge_Xiongnu	Guanzhuang	China_Upper_YR_LN	-0.0011	-0.319	24448	24503	469949
Mbuti	Balochi	Guanzhuang	China_Upper_YR_LN	-0.0008	-0.315	31192	31242	631277
Mbuti	Philippines_RedSlippedPottery	Guanzhuang	China_Upper_YR_LN	-0.0055	-0.304	578	585	11635
Mbuti	Germany_EN_LBK	Guanzhuang	China_Upper_YR_LN	-0.0007	-0.293	30872	30914	626184
Mbuti	Mongolia_Arkhangai_XiongnuEarlyMedieval_3	Guanzhuang	China_Upper_YR_LN	-0.0007	-0.291	32350	32395	630350
Mbuti	Georgia_Satsurblia	Guanzhuang	China_Upper_YR_LN	-0.001	-0.271	23109	23154	469619
Mbuti	Kazakhstan_Wusun_LateSaka_dup	Guanzhuang	China_Upper_YR_LN	-0.0016	-0.271	6767	6789	135056
Mbuti	Mongolia_Arkhangai_XiongnuEarlyMedieval_1	Guanzhuang	China_Upper_YR_LN	-0.001	-0.266	23454	23499	476360
Mbuti	Kazakhstan_Botai_Eneolithic	Guanzhuang	China_Upper_YR_LN	-0.0008	-0.241	23548	23584	470247
Mbuti	Armenia_EBA	Guanzhuang	China_Upper_YR_LN	-0.0006	-0.205	26168	26197	534644
Mbuti	Naxi	Guanzhuang	China_Upper_YR_LN	-0.0005	-0.199	33089	33122	631364
Mbuti	Koryak	Guanzhuang	China_Upper_YR_LN	-0.0005	-0.175	33868	33903	649663
Mbuti	Kongo	Guanzhuang	China_Upper_YR_LN	-0.0004	-0.156	25349	25369	629533
Mbuti	Mongolia_Chalcolithic_Afanasievo_1	Guanzhuang	China_Upper_YR_LN	-0.0006	-0.153	18159	18180	369892
Mbuti	Sherpa	Guanzhuang	China_Upper_YR_LN	-0.0004	-0.146	32976	33002	631323
Mbuti	Nahua	Guanzhuang	China_Upper_YR_LN	-0.0004	-0.143	32514	32543	630601
Mbuti	Russia_UstIda_EBA	Guanzhuang	China_Upper_YR_LN	-0.0004	-0.14	25205	25226	490617
Mbuti	Mongolia_IA_Xianbei	Guanzhuang	China_Upper_YR_LN	-0.0005	-0.12	19650	19668	384301
Mbuti	Russia_EarlyMedieval_Heshui_Mohe_1	Guanzhuang	China_Upper_YR_LN	-0.0007	-0.12	6289	6298	122725
Mbuti	Surui	Guanzhuang	China_Upper_YR_LN	-0.0003	-0.1	32691	32712	631278
Mbuti	Iran_C_SehGabi	Guanzhuang	China_Upper_YR_LN	-0.0002	-0.062	26892	26901	548241
Mbuti	Chipewyan	Guanzhuang	China_Upper_YR_LN	-0.0002	-0.055	32639	32649	631327
Mbuti	Vanuatu_2900BP	Guanzhuang	China_Upper_YR_LN	-0.0004	-0.051	3203	3206	63232
Mbuti	Russia_Blagovechensk_IA	Guanzhuang	China_Upper_YR_LN	0.0001	0.013	13723	13722	262373
Mbuti	Kurumba	Guanzhuang	China_Upper_YR_LN	0.0001	0.027	31437	31432	627903
Mbuti	Eskimo_Naukan	Guanzhuang	China_Upper_YR_LN	0.0001	0.046	32742	32733	631317
Mbuti	Russia_Buryatia_Xiongnu_mother	Guanzhuang	China_Upper_YR_LN	0.0003	0.088	18807	18794	364713
Mbuti	China_WLR_BA	Guanzhuang	China_Upper_YR_LN	0.0004	0.093	16741	16730	322451
Mbuti	Pima	Guanzhuang	China_Upper_YR_LN	0.0003	0.096	32636	32617	631278
Mbuti	Russia_Mezhovskaya	Guanzhuang	China_Upper_YR_LN	0.0004	0.11	27942	27922	565147
Mbuti	Greece_Minoan_Lassithi	Guanzhuang	China_Upper_YR_LN	0.0003	0.115	26325	26307	540849
Mbuti	China_AR_Xianbei_IA	Guanzhuang	China_Upper_YR_LN	0.001	0.184	7939	7923	152808
Mbuti	China_AR_EN	Guanzhuang	China_Upper_YR_LN	0.001	0.205	9734	9714	188688
Mbuti	Russia_AfontovaGora2	Guanzhuang	China_Upper_YR_LN	0.0026	0.24	1719	1710	34549
Mbuti	Mongolia_Sukhbaatar_LatEMedieval	Guanzhuang	China_Upper_YR_LN	0.0006	0.255	33364	33327	638744
Mbuti	Russia_Shamanka_EBA	Guanzhuang	China_Upper_YR_LN	0.0008	0.258	30935	30889	596181
Mbuti	Australian	Guanzhuang	China_Upper_YR_LN	0.0007	0.259	31605	31560	631224
Mbuti	Bulgaria_C	Guanzhuang	China_Upper_YR_LN	0.0007	0.262	26808	26771	545995
Mbuti	Mongolia_Tuv_LatEMedieval	Guanzhuang	China_Upper_YR_LN	0.0008	0.266	26844	26803	518895
Mbuti	Eskimo_Chaplin	Guanzhuang	China_Upper_YR_LN	0.0008	0.275	32809	32754	630706
Mbuti	China_Miaozigou_MN	Guanzhuang	China_Upper_YR_LN	0.0014	0.284	9358	9332	179320
Mbuti	Slovakia_Poprad	Guanzhuang	China_Upper_YR_LN	0.0013	0.295	13398	13364	271366
Mbuti	Mongolia_Dornod_PreBronze	Guanzhuang	China_Upper_YR_LN	0.0023	0.338	4737	4715	92336
Mbuti	Yi	Guanzhuang	China_Upper_YR_LN	0.001	0.354	33137	33074	631323
Mbuti	Bulgaria_BeliBreyag_EBA	Guanzhuang	China_Upper_YR_LN	0.0023	0.356	5652	5627	117621
Mbuti	Russia_Lokomotiv_Eneolithic	Guanzhuang	China_Upper_YR_LN	0.001	0.359	29969	29908	575519
Mbuti	Armenia_LBA	Guanzhuang	China_Upper_YR_LN	0.0015	0.37	12293	12256	257084
Mbuti	Pakistan_Loebanr_IA	Guanzhuang	China_Upper_YR_LN	0.0008	0.376	30606	30558	616134
Mbuti	Yakut	Guanzhuang	China_Upper_YR_LN	0.001	0.386	32853	32786	631306
Mbuti	Russia_CentralYakutia_IA	Guanzhuang	China_Upper_YR_LN	0.0038	0.395	2246	2228	42313
Mbuti	Canada_MDorset	Guanzhuang	China_Upper_YR_LN	0.0043	0.406	1711	1696	34087
Mbuti	Papuan	Guanzhuang	China_Upper_YR_LN	0.0011	0.413	31644	31578	631376
Mbuti	Israel_Natufian_published	Guanzhuang	China_Upper_YR_LN	0.0034	0.47	4025	3998	83822
Mbuti	Oroqen	Guanzhuang	China_Upper_YR_LN	0.0013	0.475	33007	32921	631304
Mbuti	Mongolia_Arkhangai_XiongnuEarlyMedieval_2	Guanzhuang	China_Upper_YR_LN	0.0016	0.492	21705	21635	438853
Mbuti	Yiyang	Guanzhuang	China_Upper_YR_LN	0.0031	0.501	5887	5850	117237
Mbuti	China_AmurRiver_LPaleolithic	Guanzhuang	China_Upper_YR_LN	0.0016	0.51	22162	22091	432422
Mbuti	China_Shimao_LN	Guanzhuang	China_Upper_YR_LN	0.0015	0.511	33695	33594	638920
Mbuti	Mongolia_Uvurkhangai_Xiongnu	Guanzhuang	China_Upper_YR_LN	0.0016	0.528	28054	27965	540538
Mbuti	Czech	Guanzhuang	China_Upper_YR_LN	0.0016	0.537	31322	31224	630106
Mbuti	Mongolia_Sukhbaatar_MLBAXiongnuLatEMedieval_sister	Guanzhuang	China_Upper_YR_LN	0.0064	0.541	1596	1576	30851
Mbuti	Russia_UstBelaya_Angara	Guanzhuang	China_Upper_YR_LN	0.0014	0.588	31045	30955	598338
Mbuti	Russia_Krasnoyarsk_BA	Guanzhuang	China_Upper_YR_LN	0.0021	0.619	33866	33725	649332
Mbuti	Tibetan	Guanzhuang	China_Upper_YR_LN	0.0017	0.649	32925	32816	631325
Mbuti	Jordan_EBA	Guanzhuang	China_Upper_YR_LN	0.002	0.673	20388	20306	419192
Mbuti	Russia_Chita_BA	Guanzhuang	China_Upper_YR_LN	0.0045	0.693	4956	4911	95173
Mbuti	Buryat	Guanzhuang	China_Upper_YR_LN	0.0016	0.702	33833	33724	649686
Mbuti	Laos_Hoabinhian	Guanzhuang	China_Upper_YR_LN	0.0031	0.737	13852	13765	281550
Mbuti	Kazakhstan_Berel_IA_o3	Guanzhuang	China_Upper_YR_LN	0.0019	0.751	31628	31505	608906
Mbuti	Kazakhstan_IA_Saka_dup	Guanzhuang	China_Upper_YR_LN	0.0053	0.774	4300	4254	86122
Mbuti	Mongolia_Tuv_Xiongnu	Guanzhuang	China_Upper_YR_LN	0.0028	0.803	28026	27871	536875
Mbuti	Nepal_Mebrak_2125BP	Guanzhuang	China_Upper_YR_LN	0.003	0.82	21467	21336	409896
Mbuti	Spain_EN	Guanzhuang	China_Upper_YR_LN	0.0022	0.826	27885	27763	569241
Mbuti	Mongolia_Tuv_EIA	Guanzhuang	China_Upper_YR_LN	0.0037	0.83	14914	14805	286990
Mbuti	Iran_GanjDareh_N	Guanzhuang	China_Upper_YR_LN	0.0022	0.833	27880	27757	569327
Mbuti	Russia_KadalinkaRiver_N	Guanzhuang	China_Upper_YR_LN	0.0031	0.838	31721	31525	604323
Mbuti	Mongolia_EIA_Xiongnu_7	Guanzhuang	China_Upper_YR_LN	0.0033	0.864	19179	19054	372046
Mbuti	Mongolia_Arkhangai_MLBAtoEIAorMedieval_o	Guanzhuang	China_Upper_YR_LN	0.0055	0.866	5208	5151	100436
Mbuti	Even	Guanzhuang	China_Upper_YR_LN	0.0022	0.87	32938	32792	631344
Mbuti	Kazakhstan_Korgantas_IA	Guanzhuang	China_Upper_YR_LN	0.0032	0.873	24362	24206	469943
Mbuti	Hezhen	Guanzhuang	China_Upper_YR_LN	0.0023	0.889	33009	32856	631334
Mbuti	Kazakhstan_GoldenHordeAsian	Guanzhuang	China_Upper_YR_LN	0.0033	0.958	32007	31793	614007
Mbuti	Russia_LenaRiver_EN	Guanzhuang	China_Upper_YR_LN	0.0033	0.964	28393	28209	540637
Mbuti	Russia_Kurma_EBA	Guanzhuang	China_Upper_YR_LN	0.0035	0.966	20221	20079	391728
Mbuti	China_WLR_LN	Guanzhuang	China_Upper_YR_LN	0.003	0.973	26153	25995	499946
Mbuti	China_WLR_MN	Guanzhuang	China_Upper_YR_LN	0.003	0.978	33937	33731	643265
Mbuti	Mongolia_Khuvsgul_XiongnuLatEMedieval_1	Guanzhuang	China_Upper_YR_LN	0.0027	0.991	28725	28573	568929
Mbuti	Russia_ArgunRiver_M	Guanzhuang	China_Upper_YR_LN	0.0033	0.998	33413	33193	638169
Mbuti	Mongolia_Uvurkhangai_EIALatEMedieval	Guanzhuang	China_Upper_YR_LN	0.0031	1.015	26499	26336	512522
Mbuti	Russia_KuengaRiver_N_2	Guanzhuang	China_Upper_YR_LN	0.0036	1.05	30495	30273	579899
Mbuti	Mongolia_Arkhangai_Xiongnu_o	Guanzhuang	China_Upper_YR_LN	0.0038	1.062	26207	26010	503920
Mbuti	Russia_Buryatia_Xiongnu	Guanzhuang	China_Upper_YR_LN	0.0029	1.123	30279	30103	582903
Mbuti	Canada_LateDorset	Guanzhuang	China_Upper_YR_LN	0.0063	1.129	7590	7495	147141
Mbuti	Mongolia_Khentii_Xiongnu	Guanzhuang	China_Upper_YR_LN	0.0042	1.135	24169	23965	465460
Mbuti	Mongolia_LBA_CenterWest_4_o	Guanzhuang	China_Upper_YR_LN	0.0045	1.183	20008	19827	386582
Mbuti	Mongolia_Bulgan_EarlyMedievalLatEMedieval	Guanzhuang	China_Upper_YR_LN	0.0029	1.193	31709	31526	610320
Mbuti	Mongolia_Dornod_LatEMedieval	Guanzhuang	China_Upper_YR_LN	0.003	1.207	31743	31556	610416
Mbuti	Mongolia_Selenge_XiongnuMedieval_o1	Guanzhuang	China_Upper_YR_LN	0.0066	1.219	7665	7564	148083
Mbuti	Russia_Shamanka_Eneolithic	Guanzhuang	China_Upper_YR_LN	0.0028	1.245	34034	33846	649617
Mbuti	Russia_Siberia_Lena_EBA_o	Guanzhuang	China_Upper_YR_LN	0.0134	1.261	1740	1694	34393
Mbuti	Mongolia_Arkhangai_EarlyMedieval	Guanzhuang	China_Upper_YR_LN	0.0029	1.276	31550	31370	629376
Mbuti	Kazakhstan_IA_Berel_Pazyryk	Guanzhuang	China_Upper_YR_LN	0.004	1.286	28938	28704	567102
Mbuti	Mongolia_Uvs_EIAXiongnuLateMedival	Guanzhuang	China_Upper_YR_LN	0.0032	1.318	31206	31008	615708
Mbuti	Tubalar	Guanzhuang	China_Upper_YR_LN	0.0034	1.338	32435	32218	631345
Mbuti	Mongolia_Umungobi_LatEMedieval	Guanzhuang	China_Upper_YR_LN	0.0034	1.34	29968	29766	578439
Mbuti	China_HMMH_MN	Guanzhuang	China_Upper_YR_LN	0.0052	1.388	20750	20534	398755
Mbuti	Russia_Siberia_UP	Guanzhuang	China_Upper_YR_LN	0.0064	1.458	14799	14611	289579
Mbuti	Mongolia_Bulgan_Xiongnu	Guanzhuang	China_Upper_YR_LN	0.0044	1.462	27048	26814	521596
Mbuti	Jordan_PPNB_published	Guanzhuang	China_Upper_YR_LN	0.0115	1.476	3329	3254	68855
Mbuti	Mongolia_Khentii_Xiongnu_daughter	Guanzhuang	China_Upper_YR_LN	0.0063	1.501	15889	15691	306610
Mbuti	Russia_MN_Boisman	Guanzhuang	China_Upper_YR_LN	0.0041	1.544	27482	27260	527235
Mbuti	China_AmurRiver_N	Guanzhuang	China_Upper_YR_LN	0.005	1.565	21334	21122	413821
Mbuti	Longlin	Guanzhuang	China_Upper_YR_LN	0.0122	1.609	3933	3838	80084
Mbuti	China_AR_IA	Guanzhuang	China_Upper_YR_LN	0.0187	1.629	1485	1431	29147
Mbuti	Mongolia_Khuvsgul_XiongnuLatEMedieval_2	Guanzhuang	China_Upper_YR_LN	0.0041	1.646	30617	30366	590600
Mbuti	Russia_IA_Yankovsky	Guanzhuang	China_Upper_YR_LN	0.0074	1.736	15827	15595	304249
Mbuti	Greenland_Saqqaq	Guanzhuang	China_Upper_YR_LN	0.006	1.783	30204	29843	583305
Mbuti	Mongolia_EIA_8	Guanzhuang	China_Upper_YR_LN	0.0071	1.803	19453	19180	374781
Mbuti	China_AmurRiver_BA	Guanzhuang	China_Upper_YR_LN	0.0407	1.812	440	406	8247
Mbuti	Mongolia_Sukhbaatar_MLBA	Guanzhuang	China_Upper_YR_LN	0.0079	1.847	15523	15280	299632
Mbuti	Kazakhstan_TianShan_Saka	Guanzhuang	China_Upper_YR_LN	0.0182	1.882	2126	2050	42772
Mbuti	Mongolia_Ulaanbaatar_EIALatEMedieval	Guanzhuang	China_Upper_YR_LN	0.0086	1.884	12691	12475	245534
Mbuti	China_AmurRiver_Mesolithic	Guanzhuang	China_Upper_YR_LN	0.0067	1.884	16477	16258	320384
Mbuti	Mongolia_East_N	Guanzhuang	China_Upper_YR_LN	0.0059	1.952	26711	26398	511634
Mbuti	China_AmurRiver_EarlyN	Guanzhuang	China_Upper_YR_LN	0.0073	2.012	18313	18047	355480
Mbuti	Nepal_Samdzong_1500BP	Guanzhuang	China_Upper_YR_LN	0.0051	2.083	34113	33768	649193
Mbuti	Russia_AginBuryat_N	Guanzhuang	China_Upper_YR_LN	0.0092	2.117	11547	11337	219508
Mbuti	Mongolia_EBA_Chemurchek_2	Guanzhuang	China_Upper_YR_LN	0.007	2.129	22834	22516	458666
Mbuti	Mongolia_Khovd_MLBAEarlyMedieval	Guanzhuang	China_Upper_YR_LN	0.0064	2.202	27945	27592	552731
Mbuti	Mongolia_Sukhbaatar_MLBAXiongnuLatEMedieval	Guanzhuang	China_Upper_YR_LN	0.0051	2.289	32719	32388	624532
Mbuti	Russia_Buryatia_PreBronze	Guanzhuang	China_Upper_YR_LN	0.0083	2.358	22321	21952	428621
Mbuti	Mongolia_Arkhangai_PreBronze	Guanzhuang	China_Upper_YR_LN	0.009	2.406	20469	20104	393045
Mbuti	Mongolia_Khovd_MLBAXiongnuLatEMedieval	Guanzhuang	China_Upper_YR_LN	0.0104	2.478	13700	13419	262586
Mbuti	China_WLR_BA_o	Guanzhuang	China_Upper_YR_LN	0.0097	2.654	22350	21922	426802
Mbuti	Mongolia_LBA_Ulaanzukh_2_dup	Guanzhuang	China_Upper_YR_LN	0.0106	2.661	22114	21650	424351
Mbuti	Mongolia_Khentii_LatEMedieval	Guanzhuang	China_Upper_YR_LN	0.0082	2.71	26754	26319	514629
Mbuti	Russia_Siberia_Irkutsk_EBA	Guanzhuang	China_Upper_YR_LN	0.0084	2.733	26673	26227	510607
Mbuti	Russia_AngaraRiver_EN	Guanzhuang	China_Upper_YR_LN	0.0093	2.757	32209	31618	612755
Mbuti	Mongolia_EIA_SlabGrave_1	Guanzhuang	China_Upper_YR_LN	0.0065	2.792	31966	31553	609513
Mbuti	Mongolia_EBA_Ulgii_1_dup	Guanzhuang	China_Upper_YR_LN	0.0119	3.295	26553	25926	511639
Mbuti	Mongolia_LBA_Ulaanzukh_2	Guanzhuang	China_Upper_YR_LN	0.0124	3.969	23647	23069	453496
Mbuti	Mongolia_North_N	Guanzhuang	China_Upper_YR_LN	0.011	4.153	29675	29031	565973
Mbuti	Mongolia_Chalcolithic_Afanasievo_2	Guanzhuang	China_Upper_YR_LN	0.0195	4.64	17610	16936	336986
Mbuti	Yumin	Guanzhuang	China_Upper_YR_LN	0.0202	5.118	21097	20263	405124
Mbuti	China_NEastAsia_Inland_EN	Guanzhuang	China_Upper_YR_LN	0.0202	5.118	21097	20263	405124

## Sheet: H
Table S2H. f4(Mbuti, Reference; X, Guanzhuang) to evaluate the genetic divergence between the Guanzhuang population and population X. The 'Reference' group consists of 287 ancient and contemporary populations, while population X includes ancient populations from various regions of East Asia. |Z|>3 indicates the significant values, highlighted in Datas by blue (positive) and red (negative) ; 2<|Z|…
f4(Mbuti, Reference; Guanzhuang, China_WLR_BA)
pop1	pop2	pop3	pop4	f4	Z	ABAB	ABBA	SNPs
Mbuti	JPT	Guanzhuang	China_WLR_BA	-0.0141	-4.492	16788	17269	325158
Mbuti	CHS	Guanzhuang	China_WLR_BA	-0.014	-4.41	16762	17237	325158
Mbuti	CHB	Guanzhuang	China_WLR_BA	-0.0134	-4.253	16783	17238	325158
Mbuti	Taiwan_Liangdao_LatePaleolithic	Guanzhuang	China_WLR_BA	-0.0423	-3.77	2247	2446	43850
Mbuti	Lebanon_MBA	Guanzhuang	China_WLR_BA	-0.0142	-3.755	15628	16079	322716
Mbuti	Nepal_Chokhopani_2800BP	Guanzhuang	China_WLR_BA	-0.018	-3.564	16581	17188	324795
Mbuti	KHV	Guanzhuang	China_WLR_BA	-0.0111	-3.512	16749	17124	325158
Mbuti	CDX	Guanzhuang	China_WLR_BA	-0.0109	-3.412	16756	17125	325158
Mbuti	Dusun	Guanzhuang	China_WLR_BA	-0.0127	-3.329	16238	16656	317488
Mbuti	Dungan	Guanzhuang	China_WLR_BA	-0.0131	-3.181	16674	17117	325075
Mbuti	Han	Guanzhuang	China_WLR_BA	-0.0108	-3.004	16380	16738	317527
Mbuti	Malaysia_historical	Guanzhuang	China_WLR_BA	-0.0208	-2.935	6974	7271	138597
Mbuti	She	Guanzhuang	China_WLR_BA	-0.0091	-2.721	16848	17158	325152
Mbuti	Daur	Guanzhuang	China_WLR_BA	-0.0129	-2.669	16227	16650	316750
Mbuti	Tujia	Guanzhuang	China_WLR_BA	-0.0088	-2.647	16833	17130	325152
Mbuti	Atayal	Guanzhuang	China_WLR_BA	-0.0119	-2.642	16313	16706	316980
Mbuti	Tajik	Guanzhuang	China_WLR_BA	-0.0096	-2.562	15542	15844	317513
Mbuti	China_Lahu	Guanzhuang	China_WLR_BA	-0.0096	-2.497	16293	16609	317497
Mbuti	Kinh	Guanzhuang	China_WLR_BA	-0.0093	-2.404	16342	16649	317476
Mbuti	ONG	Guanzhuang	China_WLR_BA	-0.0093	-2.364	16112	16413	323446
Mbuti	Mongolia_Xiongnu_o1	Guanzhuang	China_WLR_BA	-0.0096	-2.339	16685	17008	324937
Mbuti	Tanshishan	Guanzhuang	China_WLR_BA	-0.0186	-2.324	4796	4978	97854
Mbuti	China_Shimao_LN	Guanzhuang	China_WLR_BA	-0.01	-2.305	16651	16988	321490
Mbuti	Chechen	Guanzhuang	China_WLR_BA	-0.0097	-2.289	15470	15773	316790
Mbuti	JXNT	Guanzhuang	China_WLR_BA	-0.0106	-2.249	15306	15634	296656
Mbuti	Tonga_2500BP	Guanzhuang	China_WLR_BA	-0.0222	-2.231	3161	3304	63399
Mbuti	Kazakhstan_Kipchak1	Guanzhuang	China_WLR_BA	-0.0127	-2.228	10807	11084	219944
Mbuti	LG	Guanzhuang	China_WLR_BA	-0.0106	-2.207	15079	15401	293133
Mbuti	Estonian	Guanzhuang	China_WLR_BA	-0.0086	-2.202	15561	15829	317511
Mbuti	Myanmar_LN_BA_published_lc	Guanzhuang	China_WLR_BA	-0.0825	-2.194	178	210	3721
Mbuti	Shenxian	Guanzhuang	China_WLR_BA	-0.0144	-2.103	8355	8600	167078
Mbuti	Dai	Guanzhuang	China_WLR_BA	-0.0073	-2.082	16795	17042	325157
Mbuti	Burmese	Guanzhuang	China_WLR_BA	-0.0077	-2.079	16283	16537	317507
Mbuti	Miao	Guanzhuang	China_WLR_BA	-0.0084	-2.067	16394	16672	317518
Mbuti	Tuscan_1	Guanzhuang	China_WLR_BA	-0.0079	-2.041	15518	15765	317508
Mbuti	Igorot	Guanzhuang	China_WLR_BA	-0.008	-2.034	16337	16601	317506
Mbuti	Tu	Guanzhuang	China_WLR_BA	-0.0065	-2.019	16795	17013	325153
Mbuti	Adygei	Guanzhuang	China_WLR_BA	-0.0075	-2.004	15532	15765	317497
Mbuti	China_Upper_YR_LN	Guanzhuang	China_WLR_BA	-0.0079	-1.991	16741	17007	322451
Mbuti	Vietnam_historical	Guanzhuang	China_WLR_BA	-0.0175	-1.969	3699	3831	73078
Mbuti	Yi	Guanzhuang	China_WLR_BA	-0.0077	-1.958	16401	16657	317506
Mbuti	Naxi	Guanzhuang	China_WLR_BA	-0.0068	-1.925	16437	16663	317529
Mbuti	China_YR_LBIA	Guanzhuang	China_WLR_BA	-0.0072	-1.837	16729	16972	322904
Mbuti	Laos_BA	Guanzhuang	China_WLR_BA	-0.0144	-1.783	5001	5147	99922
Mbuti	Russia_Ust_Ishim	Guanzhuang	China_WLR_BA	-0.0076	-1.775	14580	14804	299853
Mbuti	Taiwan_Gongguan	Guanzhuang	China_WLR_BA	-0.0112	-1.764	8957	9160	176754
Mbuti	Kazakhstan_Central_Saka	Guanzhuang	China_WLR_BA	-0.0068	-1.653	15766	15981	312675
Mbuti	USA_WA_Kennewick	Guanzhuang	China_WLR_BA	-0.01	-1.614	9855	10054	194828
Mbuti	Indonesia_LN_BA_IA	Guanzhuang	China_WLR_BA	-0.0217	-1.61	1418	1481	28962
Mbuti	Russia_LBA_1	Guanzhuang	China_WLR_BA	-0.0265	-1.587	869	916	18655
Mbuti	Vietnam_LN	Guanzhuang	China_WLR_BA	-0.0114	-1.576	5368	5492	108428
Mbuti	Ami	Guanzhuang	China_WLR_BA	-0.0064	-1.567	16480	16693	317496
Mbuti	Sherpa	Guanzhuang	China_WLR_BA	-0.0064	-1.54	16377	16588	317502
Mbuti	China_YR_LN	Guanzhuang	China_WLR_BA	-0.0054	-1.537	16884	17068	324885
Mbuti	Dushan	Guanzhuang	China_WLR_BA	-0.0101	-1.531	7172	7318	145575
Mbuti	Xibo	Guanzhuang	China_WLR_BA	-0.0049	-1.499	16833	17001	325150
Mbuti	Kusunda	Guanzhuang	China_WLR_BA	-0.0059	-1.489	16062	16253	317486
Mbuti	Kazakhstan_Karluk_1	Guanzhuang	China_WLR_BA	-0.0075	-1.486	15208	15437	302779
Mbuti	Relli_1	Guanzhuang	China_WLR_BA	-0.0063	-1.462	15679	15879	317243
Mbuti	Balochi	Guanzhuang	China_WLR_BA	-0.0054	-1.443	15531	15700	317492
Mbuti	Laos_LN_BA	Guanzhuang	China_WLR_BA	-0.0078	-1.435	12343	12538	241555
Mbuti	China_SEastAsia_Coastal_EN	Guanzhuang	China_WLR_BA	-0.0131	-1.43	3754	3853	77266
Mbuti	Sardinian	Guanzhuang	China_WLR_BA	-0.0054	-1.404	15491	15660	317530
Mbuti	Mongola	Guanzhuang	China_WLR_BA	-0.0054	-1.398	16394	16574	317509
Mbuti	GaoHuaHua	Guanzhuang	China_WLR_BA	-0.0063	-1.378	13884	14059	270863
Mbuti	Taiwan_Hanben_IA	Guanzhuang	China_WLR_BA	-0.0047	-1.369	16765	16924	323029
Mbuti	Tibetan	Guanzhuang	China_WLR_BA	-0.0052	-1.365	16312	16482	317503
Mbuti	Russia_Alan	Guanzhuang	China_WLR_BA	-0.0051	-1.341	15897	16060	323159
Mbuti	Burusho	Guanzhuang	China_WLR_BA	-0.0051	-1.334	15692	15852	317491
Mbuti	Slovakia_Poprad	Guanzhuang	China_WLR_BA	-0.0093	-1.327	6755	6882	138711
Mbuti	English	Guanzhuang	China_WLR_BA	-0.0051	-1.32	15554	15714	317503
Mbuti	Moldova_Glinoe_Scythian	Guanzhuang	China_WLR_BA	-0.0054	-1.306	15233	15396	309723
Mbuti	China_Upper_YR_IA	Guanzhuang	China_WLR_BA	-0.0057	-1.3	16155	16339	311663
Mbuti	Russia_NorthOssetian	Guanzhuang	China_WLR_BA	-0.0049	-1.288	15605	15757	317524
Mbuti	Thailand_IA	Guanzhuang	China_WLR_BA	-0.0416	-1.282	259	281	5513
Mbuti	Palestinian	Guanzhuang	China_WLR_BA	-0.0046	-1.269	15273	15413	317529
Mbuti	Iranian	Guanzhuang	China_WLR_BA	-0.0046	-1.232	15472	15615	317520
Mbuti	Vietnam_N	Guanzhuang	China_WLR_BA	-0.0119	-1.231	3062	3135	60954
Mbuti	Kazakhstan_Turk	Guanzhuang	China_WLR_BA	-0.006	-1.229	14699	14876	295143
Mbuti	Nepal_Samdzong_1500BP	Guanzhuang	China_WLR_BA	-0.0048	-1.228	16798	16960	324964
Mbuti	Lemande	Guanzhuang	China_WLR_BA	-0.0038	-1.219	12738	12836	317496
Mbuti	Russia_DevilsCave_N	Guanzhuang	China_WLR_BA	-0.005	-1.219	16820	16990	325078
Mbuti	China_Xinjian_IA	Guanzhuang	China_WLR_BA	-0.0063	-1.213	11612	11759	231589
Mbuti	Hungary_IA_Scythian	Guanzhuang	China_WLR_BA	-0.0055	-1.212	13863	14016	284259
Mbuti	Taiwan_Hanben_IA_lc	Guanzhuang	China_WLR_BA	-0.0203	-1.212	1007	1048	20029
Mbuti	Eskimo_Sireniki	Guanzhuang	China_WLR_BA	-0.0051	-1.205	16340	16507	317518
Mbuti	Bergamo	Guanzhuang	China_WLR_BA	-0.0053	-1.202	15494	15657	316746
Mbuti	Russia_EBA_o1	Guanzhuang	China_WLR_BA	-0.0114	-1.197	3072	3143	63433
Mbuti	Jew_Yemenite	Guanzhuang	China_WLR_BA	-0.0045	-1.194	15305	15444	317507
Mbuti	Kapu	Guanzhuang	China_WLR_BA	-0.0044	-1.17	15735	15876	317509
Mbuti	Georgia_Satsurblia	Guanzhuang	China_WLR_BA	-0.0065	-1.16	11464	11613	235784
Mbuti	Turkmenistan_C_Namazga_1d	Guanzhuang	China_WLR_BA	-0.0259	-1.149	536	565	11686
Mbuti	Bengali	Guanzhuang	China_WLR_BA	-0.0042	-1.14	15730	15864	317500
Mbuti	Brahmin	Guanzhuang	China_WLR_BA	-0.0041	-1.139	15651	15781	317517
Mbuti	Russia_KuengaRiver_N_1	Guanzhuang	China_WLR_BA	-0.0181	-1.126	1096	1137	21859
Mbuti	Sindhi_Pakistan	Guanzhuang	China_WLR_BA	-0.004	-1.082	15662	15788	317496
Mbuti	Thai	Guanzhuang	China_WLR_BA	-0.0042	-1.073	16311	16450	317512
Mbuti	China_SEastAsia_Coastal_Historic	Guanzhuang	China_WLR_BA	-0.0099	-1.07	3838	3914	77154
Mbuti	Turkmenistan_C_Namazga	Guanzhuang	China_WLR_BA	-0.0059	-1.06	8990	9096	189434
Mbuti	Russian	Guanzhuang	China_WLR_BA	-0.004	-1.049	15696	15823	317516
Mbuti	Mongolia_Xiongnu_o2	Guanzhuang	China_WLR_BA	-0.0051	-1.044	14882	15036	299607
Mbuti	Russia_MA1_HG	Guanzhuang	China_WLR_BA	-0.0064	-1.044	11115	11259	225325
Mbuti	Japan_Jomon	Guanzhuang	China_WLR_BA	-0.0059	-1.039	13116	13272	258855
Mbuti	Madiga	Guanzhuang	China_WLR_BA	-0.0038	-1.027	15731	15850	317514
Mbuti	Samaritan	Guanzhuang	China_WLR_BA	-0.0046	-1.019	15288	15428	315746
Mbuti	Cambodian	Guanzhuang	China_WLR_BA	-0.004	-1.012	16273	16404	317510
Mbuti	China_Miaozigou_MN	Guanzhuang	China_WLR_BA	-0.008	-1.003	5020	5101	97758
Mbuti	Makrani	Guanzhuang	China_WLR_BA	-0.0039	-1.003	15468	15588	317495
Mbuti	Kazakhstan_Kimak	Guanzhuang	China_WLR_BA	-0.0098	-0.983	3069	3129	61813
Mbuti	Russia_Tagar	Guanzhuang	China_WLR_BA	-0.0036	-0.977	16102	16217	323880
Mbuti	China_SEastAsia_Coastal_LN	Guanzhuang	China_WLR_BA	-0.0055	-0.962	8676	8772	171478
Mbuti	Mixtec_1	Guanzhuang	China_WLR_BA	-0.0044	-0.955	16141	16283	316530
Mbuti	Liangdao1	Guanzhuang	China_WLR_BA	-0.0078	-0.954	4821	4896	99510
Mbuti	Korean	Guanzhuang	China_WLR_BA	-0.0037	-0.944	16509	16631	317514
Mbuti	Germany_EBA_Unetice	Guanzhuang	China_WLR_BA	-0.0038	-0.921	14520	14632	296606
Mbuti	Chipewyan	Guanzhuang	China_WLR_BA	-0.0039	-0.916	16271	16398	317516
Mbuti	Russia_Siberia_Lena_EBA_o	Guanzhuang	China_WLR_BA	-0.0157	-0.888	941	971	19056
Mbuti	Eskimo_Chaplin	Guanzhuang	China_WLR_BA	-0.0041	-0.886	16350	16484	317219
Mbuti	China_YR_MN	Guanzhuang	China_WLR_BA	-0.0035	-0.869	16856	16976	323282
Mbuti	USA_Anzick_realigned	Guanzhuang	China_WLR_BA	-0.0043	-0.837	16529	16673	322185
Mbuti	Turkish	Guanzhuang	China_WLR_BA	-0.0031	-0.836	15574	15671	317509
Mbuti	Uyghur	Guanzhuang	China_WLR_BA	-0.0031	-0.832	16024	16122	317503
Mbuti	Hazara	Guanzhuang	China_WLR_BA	-0.0031	-0.831	16030	16129	317490
Mbuti	Bulgarian	Guanzhuang	China_WLR_BA	-0.0031	-0.808	15537	15634	317465
Mbuti	Russia_Samara_EBA_Yamnaya	Guanzhuang	China_WLR_BA	-0.003	-0.788	15344	15438	311125
Mbuti	Iran_GanjDareh_N	Guanzhuang	China_WLR_BA	-0.003	-0.749	14495	14583	298291
Mbuti	Hawaiian	Guanzhuang	China_WLR_BA	-0.0033	-0.744	16316	16425	316518
Mbuti	Lezgin	Guanzhuang	China_WLR_BA	-0.0028	-0.737	15555	15641	317517
Mbuti	Brahui	Guanzhuang	China_WLR_BA	-0.0028	-0.725	15532	15618	317506
Mbuti	China_Tianyuan	Guanzhuang	China_WLR_BA	-0.0041	-0.724	11745	11842	239320
Mbuti	Georgia_Kotias	Guanzhuang	China_WLR_BA	-0.0037	-0.711	15901	16018	325011
Mbuti	Icelandic	Guanzhuang	China_WLR_BA	-0.0027	-0.7	15660	15744	317516
Mbuti	Russia_MBA_Poltavka	Guanzhuang	China_WLR_BA	-0.0034	-0.698	12553	12637	255118
Mbuti	Khonda_Dora	Guanzhuang	China_WLR_BA	-0.003	-0.686	15926	16021	317119
Mbuti	Mongolia_Bulgan_EarlyMedieval	Guanzhuang	China_WLR_BA	-0.0038	-0.68	12286	12380	240776
Mbuti	Russia_Lokomotiv_Eneolithic	Guanzhuang	China_WLR_BA	-0.003	-0.668	14863	14952	288581
Mbuti	Finnish	Guanzhuang	China_WLR_BA	-0.0025	-0.663	15718	15795	317526
Mbuti	China_WLR_LN	Guanzhuang	China_WLR_BA	-0.0032	-0.659	13785	13874	266255
Mbuti	Kazakhstan_Nomad_IA	Guanzhuang	China_WLR_BA	-0.0034	-0.655	11202	11278	224286
Mbuti	Pathan	Guanzhuang	China_WLR_BA	-0.0024	-0.646	15689	15765	317510
Mbuti	Russia_Blagovechensk_IA	Guanzhuang	China_WLR_BA	-0.0044	-0.644	6857	6917	132534
Mbuti	Sweden_Motala_HG	Guanzhuang	China_WLR_BA	-0.0026	-0.637	14478	14554	294187
Mbuti	French	Guanzhuang	China_WLR_BA	-0.0023	-0.618	15649	15722	317529
Mbuti	Tonga_2700BP	Guanzhuang	China_WLR_BA	-0.0066	-0.612	2396	2428	48347
Mbuti	Russia_UstIda_LN	Guanzhuang	China_WLR_BA	-0.0028	-0.607	15341	15426	300350
Mbuti	China_Wuzhuangguoliang_LN	Guanzhuang	China_WLR_BA	-0.01	-0.605	684	698	13839
Mbuti	Mexico_Zapotec	Guanzhuang	China_WLR_BA	-0.0024	-0.601	16280	16358	317488
Mbuti	Guam_LateUnai_Ritidian	Guanzhuang	China_WLR_BA	-0.0079	-0.593	1573	1598	32672
Mbuti	Russia_Samara_EBA_Yamnaya_published2	Guanzhuang	China_WLR_BA	-0.0029	-0.577	14985	15071	305152
Mbuti	Armenian	Guanzhuang	China_WLR_BA	-0.0022	-0.57	15560	15627	317504
Mbuti	Spanish	Guanzhuang	China_WLR_BA	-0.0021	-0.57	15552	15617	317484
Mbuti	Qihe3	Guanzhuang	China_WLR_BA	-0.0038	-0.57	8651	8718	172333
Mbuti	Italy_Sicily_HG_OrienteC	Guanzhuang	China_WLR_BA	-0.0102	-0.536	764	779	15613
Mbuti	Punjabi	Guanzhuang	China_WLR_BA	-0.0019	-0.532	15751	15811	317530
Mbuti	BaBanQinCen	Guanzhuang	China_WLR_BA	-0.0028	-0.525	9943	9999	194082
Mbuti	Spain_ElMiron	Guanzhuang	China_WLR_BA	-0.0035	-0.496	7590	7643	158650
Mbuti	Russia_UstIda_EBA	Guanzhuang	China_WLR_BA	-0.0024	-0.493	12521	12582	245968
Mbuti	Piapoco	Guanzhuang	China_WLR_BA	-0.002	-0.47	16327	16392	317480
Mbuti	Mongolia_Sukhbaatar_MLBAXiongnuLatEMedieval_sister	Guanzhuang	China_WLR_BA	-0.0088	-0.469	875	891	17359
Mbuti	Russia_Shamanka_Eneolithic	Guanzhuang	China_WLR_BA	-0.0016	-0.453	16865	16917	325125
Mbuti	Turkmenistan_Gonur_BA_1	Guanzhuang	China_WLR_BA	-0.0018	-0.442	12780	12826	261040
Mbuti	Kashmiri_Pandit	Guanzhuang	China_WLR_BA	-0.0019	-0.43	15646	15707	316803
Mbuti	Russia_Kurma_EBA	Guanzhuang	China_WLR_BA	-0.0023	-0.423	10061	10108	197051
Mbuti	Japanese	Guanzhuang	China_WLR_BA	-0.0015	-0.418	16507	16558	317524
Mbuti	Mala	Guanzhuang	China_WLR_BA	-0.0015	-0.415	15790	15837	317523
Mbuti	Nepal_Mebrak_2125BP	Guanzhuang	China_WLR_BA	-0.0024	-0.407	10985	11037	211078
Mbuti	Chane	Guanzhuang	China_WLR_BA	-0.0018	-0.398	16264	16323	317106
Mbuti	Aleut	Guanzhuang	China_WLR_BA	-0.0015	-0.393	16099	16147	317525
Mbuti	Estonia_CordedWare	Guanzhuang	China_WLR_BA	-0.0017	-0.384	14207	14255	291022
Mbuti	Hungarian	Guanzhuang	China_WLR_BA	-0.0015	-0.383	15629	15675	317502
Mbuti	Jordanian	Guanzhuang	China_WLR_BA	-0.0014	-0.382	15356	15397	317531
Mbuti	Spain_HG	Guanzhuang	China_WLR_BA	-0.0021	-0.369	13446	13502	271645
Mbuti	Canada_MDorset_published	Guanzhuang	China_WLR_BA	-0.0051	-0.366	1488	1503	28916
Mbuti	Kazakhstan_Karakhanid	Guanzhuang	China_WLR_BA	-0.0023	-0.362	9054	9096	180959
Mbuti	Baojianshan	Guanzhuang	China_WLR_BA	-0.0021	-0.362	10699	10744	211250
Mbuti	Germany_CordedWare	Guanzhuang	China_WLR_BA	-0.0013	-0.352	15593	15634	315119
Mbuti	Kazakhstan_Kangju_o1	Guanzhuang	China_WLR_BA	-0.0018	-0.339	10226	10264	210040
Mbuti	LaCen	Guanzhuang	China_WLR_BA	-0.0019	-0.338	11193	11235	218614
Mbuti	Mongolia_Selenge_Xiongnu	Guanzhuang	China_WLR_BA	-0.0018	-0.332	12995	13043	250343
Mbuti	Mayan	Guanzhuang	China_WLR_BA	-0.0013	-0.331	16340	16384	317460
Mbuti	Kyrgyzstan_TianShan_Hun	Guanzhuang	China_WLR_BA	-0.0011	-0.328	16311	16346	325109
Mbuti	Orcadian	Guanzhuang	China_WLR_BA	-0.0013	-0.328	15658	15698	317505
Mbuti	Russia_Potapovka	Guanzhuang	China_WLR_BA	-0.0039	-0.318	2065	2081	42005
Mbuti	Russia_Abkhasian	Guanzhuang	China_WLR_BA	-0.0012	-0.311	15575	15612	317507
Mbuti	Papuan	Guanzhuang	China_WLR_BA	-0.0012	-0.305	15785	15821	317528
Mbuti	Turkmenistan_IA	Guanzhuang	China_WLR_BA	-0.0016	-0.3	13426	13470	274001
Mbuti	Altaian	Guanzhuang	China_WLR_BA	-0.0013	-0.291	16257	16300	316958
Mbuti	Russia_IA_EarlySarmatian	Guanzhuang	China_WLR_BA	-0.0016	-0.288	10062	10094	203484
Mbuti	Druze	Guanzhuang	China_WLR_BA	-0.0011	-0.276	15464	15497	317498
Mbuti	Kongo	Guanzhuang	China_WLR_BA	-0.0011	-0.272	12691	12718	316623
Mbuti	Kazakhstan_Central_Steppe_EMBA	Guanzhuang	China_WLR_BA	-0.0011	-0.264	16483	16518	325052
Mbuti	Russia_AfontovaGora2	Guanzhuang	China_WLR_BA	-0.0045	-0.256	969	978	19393
Mbuti	Mongolia_Dornod_Xiongnu	Guanzhuang	China_WLR_BA	-0.0013	-0.254	13499	13534	262068
Mbuti	Czech	Guanzhuang	China_WLR_BA	-0.0011	-0.239	15664	15699	316943
Mbuti	Kazakhstan_Wusun_LateSaka_dup	Guanzhuang	China_WLR_BA	-0.0023	-0.235	3353	3368	67969
Mbuti	Australian	Guanzhuang	China_WLR_BA	-0.0009	-0.232	15760	15790	317448
Mbuti	China_SEastAsia_Island_LN	Guanzhuang	China_WLR_BA	-0.0042	-0.216	734	740	15170
Mbuti	Suogang	Guanzhuang	China_WLR_BA	-0.0042	-0.216	734	740	15170
Mbuti	Russia_BA_Okunevo	Guanzhuang	China_WLR_BA	-0.0007	-0.203	16424	16447	325067
Mbuti	Russia_CentralYakutia_IA	Guanzhuang	China_WLR_BA	-0.003	-0.192	1128	1134	21425
Mbuti	Cretan	Guanzhuang	China_WLR_BA	-0.0007	-0.181	15545	15567	317483
Mbuti	Russia_LenaRiver_EN	Guanzhuang	China_WLR_BA	-0.0009	-0.178	14330	14356	273747
Mbuti	Russia_HG_Karelia	Guanzhuang	China_WLR_BA	-0.0009	-0.176	14110	14136	286303
Mbuti	Kazakhstan_Nomad_IA_o	Guanzhuang	China_WLR_BA	-0.0015	-0.172	4001	4013	81413
Mbuti	Kazakhstan_Nomad_Hun_Sarmatian	Guanzhuang	China_WLR_BA	-0.0008	-0.159	14303	14325	278496
Mbuti	Vietnam_BA_all	Guanzhuang	China_WLR_BA	-0.001	-0.141	6521	6534	127236
Mbuti	Boshan	Guanzhuang	China_WLR_BA	-0.0008	-0.137	13819	13840	267577
Mbuti	USA_Ancient_Beringian	Guanzhuang	China_WLR_BA	-0.0006	-0.124	16754	16775	325126
Mbuti	Greece_BA_Mycenaean	Guanzhuang	China_WLR_BA	-0.0007	-0.117	5578	5587	125520
Mbuti	Yadava	Guanzhuang	China_WLR_BA	-0.0004	-0.104	15759	15771	317504
Mbuti	Irula	Guanzhuang	China_WLR_BA	-0.0004	-0.102	15768	15780	317510
Mbuti	Karitiana	Guanzhuang	China_WLR_BA	-0.0004	-0.102	16360	16374	317516
Mbuti	Xitoucun	Guanzhuang	China_WLR_BA	-0.0006	-0.1	7214	7223	142290
Mbuti	Chukchi	Guanzhuang	China_WLR_BA	-0.0004	-0.097	16099	16113	317196
Mbuti	Kazakhstan_Wusun	Guanzhuang	China_WLR_BA	-0.0004	-0.086	14660	14672	295044
Mbuti	Eskimo_Naukan	Guanzhuang	China_WLR_BA	-0.0003	-0.077	16423	16433	317502
Mbuti	Greece_Minoan_Odigitria	Guanzhuang	China_WLR_BA	-0.0007	-0.076	3364	3369	69336
Mbuti	Russia_Samara_EBA_Yamnaya_published	Guanzhuang	China_WLR_BA	-0.0005	-0.074	7688	7696	159260
Mbuti	Bougainville	Guanzhuang	China_WLR_BA	-0.0003	-0.065	15924	15933	317393
Mbuti	Iran_C_SehGabi	Guanzhuang	China_WLR_BA	-0.0003	-0.065	14094	14102	287709
Mbuti	Mixe	Guanzhuang	China_WLR_BA	-0.0003	-0.064	16328	16336	317524
Mbuti	Vietnam_BA_DongSonCulture	Guanzhuang	China_WLR_BA	-0.0004	-0.062	5536	5541	115118
Mbuti	Surui	Guanzhuang	China_WLR_BA	-0.0002	-0.056	16405	16413	317488
Mbuti	BedouinB	Guanzhuang	China_WLR_BA	-0.0001	-0.03	15342	15346	317485
Mbuti	Armenia_EBA	Guanzhuang	China_WLR_BA	0	-0.007	13832	13832	282406
Mbuti	Guanzhuang_o1	Guanzhuang	China_WLR_BA	0.0002	0.008	336	336	6312
Mbuti	Armenia_LBA	Guanzhuang	China_WLR_BA	0.0001	0.019	6734	6732	140368
Mbuti	Mongolia_Arkhangai_XiongnuEarlyMedieval_1	Guanzhuang	China_WLR_BA	0.0001	0.019	12521	12519	254232
Mbuti	Georgian	Guanzhuang	China_WLR_BA	0.0001	0.02	15573	15571	317516
Mbuti	Hezhen	Guanzhuang	China_WLR_BA	0.0001	0.022	16457	16454	317513
Mbuti	Laos_Hoabinhian	Guanzhuang	China_WLR_BA	0.0002	0.025	6904	6901	142162
Mbuti	Italy_North_Villabruna_HG	Guanzhuang	China_WLR_BA	0.0002	0.036	11643	11639	238163
Mbuti	Kazakhstan_Kumsay_EBA	Guanzhuang	China_WLR_BA	0.0002	0.039	13235	13231	263969
Mbuti	Mongolia_Bulgan_LatEMedieval	Guanzhuang	China_WLR_BA	0.0003	0.048	11576	11569	223336
Mbuti	Kalash	Guanzhuang	China_WLR_BA	0.0002	0.062	15717	15709	317520
Mbuti	Vanuatu_3000BP	Guanzhuang	China_WLR_BA	0.0008	0.062	1685	1682	33139
Mbuti	Russia_KolymaRiver_LN	Guanzhuang	China_WLR_BA	0.0004	0.085	16893	16881	325106
Mbuti	Buryat	Guanzhuang	China_WLR_BA	0.0004	0.098	16820	16808	325153
Mbuti	Pima	Guanzhuang	China_WLR_BA	0.0005	0.115	16366	16350	317495
Mbuti	Poland_Globular_Amphora_published	Guanzhuang	China_WLR_BA	0.0021	0.124	943	939	19541
Mbuti	Longlin	Guanzhuang	China_WLR_BA	0.0015	0.128	2320	2313	47101
Mbuti	China_AR_IA	Guanzhuang	China_WLR_BA	0.0025	0.13	815	811	16123
Mbuti	Liangdao2	Guanzhuang	China_WLR_BA	0.0009	0.156	12286	12265	241088
Mbuti	Kazakhstan_Berel_IA_o3	Guanzhuang	China_WLR_BA	0.0006	0.164	16173	16153	312657
Mbuti	Vietnam_BA	Guanzhuang	China_WLR_BA	0.0015	0.164	4335	4322	85150
Mbuti	China_SEastAsia_Island_EN	Guanzhuang	China_WLR_BA	0.0009	0.174	12645	12623	247626
Mbuti	Mansi	Guanzhuang	China_WLR_BA	0.0007	0.191	16114	16090	317517
Mbuti	Vanuatu_2900BP	Guanzhuang	China_WLR_BA	0.0024	0.194	1923	1914	37467
Mbuti	Mongolia_Arkhangai_XiongnuEarlyMedieval_3	Guanzhuang	China_WLR_BA	0.0007	0.2	16349	16326	319731
Mbuti	Russia_AfontovaGora3	Guanzhuang	China_WLR_BA	0.0022	0.207	3010	2997	63738
Mbuti	Kurumba	Guanzhuang	China_WLR_BA	0.001	0.227	15739	15708	315568
Mbuti	Yakut	Guanzhuang	China_WLR_BA	0.0009	0.227	16448	16420	317505
Mbuti	Russia_Chita_BA	Guanzhuang	China_WLR_BA	0.0025	0.231	2467	2454	47817
Mbuti	Russia_Karasuk_oRISE	Guanzhuang	China_WLR_BA	0.001	0.268	16293	16262	324633
Mbuti	Russia_KolymaRiver_LN_1d	Guanzhuang	China_WLR_BA	0.0023	0.306	6199	6170	119249
Mbuti	Yiyang	Guanzhuang	China_WLR_BA	0.0031	0.309	3409	3388	67843
Mbuti	Russia_SaltovoMayaki	Guanzhuang	China_WLR_BA	0.0047	0.31	1233	1222	26425
Mbuti	Mongolia_Khentii_EIA_SlabGrave	Guanzhuang	China_WLR_BA	0.0044	0.35	1847	1831	36427
Mbuti	Israel_C	Guanzhuang	China_WLR_BA	0.0014	0.352	14538	14497	298825
Mbuti	Russia_Andronovo	Guanzhuang	China_WLR_BA	0.0015	0.357	15889	15840	322461
Mbuti	Bulgaria_Varna_C	Guanzhuang	China_WLR_BA	0.0028	0.375	5485	5454	112018
Mbuti	Russia_Srubnaya	Guanzhuang	China_WLR_BA	0.0014	0.378	15825	15781	318859
Mbuti	Albanian	Guanzhuang	China_WLR_BA	0.0017	0.381	15680	15625	317164
Mbuti	China_HMMH_MN	Guanzhuang	China_WLR_BA	0.0023	0.385	10678	10629	206696
Mbuti	Canada_LateDorset	Guanzhuang	China_WLR_BA	0.0033	0.386	4174	4146	80878
Mbuti	Kazakhstan_TianShan_Saka	Guanzhuang	China_WLR_BA	0.0064	0.414	1083	1069	21944
Mbuti	Russia_Kalmykia_EBA_Yamnaya	Guanzhuang	China_WLR_BA	0.0017	0.415	15195	15144	308667
Mbuti	Bulgaria_IA	Guanzhuang	China_WLR_BA	0.003	0.432	8088	8040	163500
Mbuti	Vietnam_N_published	Guanzhuang	China_WLR_BA	0.0071	0.45	1287	1269	24963
Mbuti	Russia_Afanasievo	Guanzhuang	China_WLR_BA	0.0016	0.459	15847	15796	318653
Mbuti	Moldova_Cimmerian	Guanzhuang	China_WLR_BA	0.0026	0.462	10910	10854	217684
Mbuti	Ulchi	Guanzhuang	China_WLR_BA	0.0018	0.464	16521	16461	317498
Mbuti	Russia_ArgunRiver_M	Guanzhuang	China_WLR_BA	0.0026	0.489	16689	16604	319568
Mbuti	Russia_KadalinkaRiver_N	Guanzhuang	China_WLR_BA	0.0027	0.491	15920	15836	304010
Mbuti	Russia_EarlyMedieval_Heshui_Mohe_1	Guanzhuang	China_WLR_BA	0.0044	0.497	3679	3647	70684
Mbuti	Spain_EN	Guanzhuang	China_WLR_BA	0.0021	0.504	14631	14571	298562
Mbuti	Quechua	Guanzhuang	China_WLR_BA	0.0021	0.524	16377	16307	317512
Mbuti	Russia_Tuva_IA_AldyBel	Guanzhuang	China_WLR_BA	0.003	0.534	10938	10873	218470
Mbuti	Russia_MLBA_Sintashta	Guanzhuang	China_WLR_BA	0.0019	0.539	15898	15839	320455
Mbuti	Spain_C	Guanzhuang	China_WLR_BA	0.002	0.563	15729	15667	318372
Mbuti	Russia_CentralYakutia_LN	Guanzhuang	China_WLR_BA	0.0028	0.586	16411	16319	315825
Mbuti	Canada_MDorset	Guanzhuang	China_WLR_BA	0.0103	0.614	966	947	19102
Mbuti	Russia_AngaraRiver_EN	Guanzhuang	China_WLR_BA	0.0032	0.62	15994	15892	307642
Mbuti	Kyrgyzstan_Medieval_Nomad_o	Guanzhuang	China_WLR_BA	0.0044	0.63	6940	6879	135753
Mbuti	Nahua	Guanzhuang	China_WLR_BA	0.0029	0.63	16359	16266	317173
Mbuti	Russia_Shamanka_EBA	Guanzhuang	China_WLR_BA	0.003	0.668	15427	15336	298687
Mbuti	Mongolia_Arkhangai_MLBAtoEIAorMedieval_o	Guanzhuang	China_WLR_BA	0.0073	0.673	2873	2831	54638
Mbuti	Russia_Siberia_Tenisei_EBA	Guanzhuang	China_WLR_BA	0.0041	0.688	10849	10761	212188
Mbuti	Mongolia_EBA_Ulgii_1_dup	Guanzhuang	China_WLR_BA	0.0037	0.689	13948	13846	271646
Mbuti	Russia_Buryatia_Xiongnu_mother	Guanzhuang	China_WLR_BA	0.0045	0.719	10482	10388	201455
Mbuti	Koryak	Guanzhuang	China_WLR_BA	0.0033	0.721	16931	16819	325144
Mbuti	Turkey_EBA_II	Guanzhuang	China_WLR_BA	0.0032	0.724	14062	13972	289923
Mbuti	Mongolia_Khuvsgul_XiongnuLatEMedieval_1	Guanzhuang	China_WLR_BA	0.0031	0.773	14958	14864	297250
Mbuti	Vanuatu_2900BP_all	Guanzhuang	China_WLR_BA	0.0083	0.785	2917	2870	56579
Mbuti	Germany_BellBeaker	Guanzhuang	China_WLR_BA	0.0027	0.786	15885	15799	319955
Mbuti	Mongolia_Ulaanbaatar_EIALatEMedieval	Guanzhuang	China_WLR_BA	0.0054	0.789	7152	7075	139012
Mbuti	Mongolia_Dundgobi_LatEMedieval	Guanzhuang	China_WLR_BA	0.0049	0.817	11754	11640	226832
Mbuti	Kazakhstan_Nomad_HP	Guanzhuang	China_WLR_BA	0.0037	0.824	16296	16176	313854
Mbuti	Kazakhstan_Botai_Eneolithic	Guanzhuang	China_WLR_BA	0.0042	0.863	12807	12700	253489
Mbuti	Tubalar	Guanzhuang	China_WLR_BA	0.0033	0.875	16241	16135	317522
Mbuti	Turkey_N	Guanzhuang	China_WLR_BA	0.0032	0.889	15852	15750	321235
Mbuti	Kazakhstan_ZevakinoChilikta_IA_2	Guanzhuang	China_WLR_BA	0.0079	0.905	4314	4246	85267
Mbuti	Turkey_MLBA_AssyrianColonyPeriod	Guanzhuang	China_WLR_BA	0.0049	0.919	10344	10243	212460
Mbuti	Philippines_RedSlippedPottery	Guanzhuang	China_WLR_BA	0.0292	0.939	307	289	5819
Mbuti	Spain_MLN	Guanzhuang	China_WLR_BA	0.0033	0.945	15646	15541	316316
Mbuti	Mongolia_Uvurkhangai_Xiongnu	Guanzhuang	China_WLR_BA	0.0043	0.946	14835	14709	284026
Mbuti	Russia_AginBuryat_N	Guanzhuang	China_WLR_BA	0.0067	0.946	5735	5659	110207
Mbuti	Mongolia_Arkhangai_PreBronze	Guanzhuang	China_WLR_BA	0.0056	0.955	11061	10939	213477
Mbuti	Russia_Krasnoyarsk_BA	Guanzhuang	China_WLR_BA	0.005	0.98	16927	16757	324999
Mbuti	Oroqen	Guanzhuang	China_WLR_BA	0.0038	0.984	16588	16462	317501
Mbuti	Russia_Buryatia_PreBronze	Guanzhuang	China_WLR_BA	0.0053	0.989	12033	11907	232179
Mbuti	Mongolia_Tuv_EIA	Guanzhuang	China_WLR_BA	0.0066	0.99	8219	8112	158037
Mbuti	Mongolia_Dornod_PreBronze	Guanzhuang	China_WLR_BA	0.0102	0.994	2684	2629	51660
Mbuti	Mongolia_Khuvsgul_XiongnuLatEMedieval_2	Guanzhuang	China_WLR_BA	0.0039	1.009	15832	15709	305810
Mbuti	Mongolia_Khentii_Xiongnu	Guanzhuang	China_WLR_BA	0.0056	1.018	13076	12930	251591
Mbuti	Mongolia_Uvurkhangai_EIALatEMedieval	Guanzhuang	China_WLR_BA	0.0046	1.022	14220	14088	274522
Mbuti	Kazakhstan_GoldenHordeAsian	Guanzhuang	China_WLR_BA	0.0055	1.031	15950	15775	308099
Mbuti	Cree1	Guanzhuang	China_WLR_BA	0.0047	1.056	16145	15994	316921
Mbuti	China_AR_Xianbei_IA	Guanzhuang	China_WLR_BA	0.0093	1.065	4213	4135	81232
Mbuti	Russia_UstBelaya_Angara	Guanzhuang	China_WLR_BA	0.0041	1.1	16116	15984	309390
Mbuti	Armenia_C	Guanzhuang	China_WLR_BA	0.0046	1.102	14291	14162	289800
Mbuti	Mongolia_Khovd_MLBAEarlyMedieval	Guanzhuang	China_WLR_BA	0.005	1.127	14644	14498	290003
Mbuti	Mongolia_Chalcolithic_Afanasievo_1	Guanzhuang	China_WLR_BA	0.0066	1.151	10313	10177	206432
Mbuti	Polish	Guanzhuang	China_WLR_BA	0.0052	1.152	15743	15580	316938
Mbuti	Greece_Minoan_Lassithi	Guanzhuang	China_WLR_BA	0.0049	1.162	13874	13739	284427
Mbuti	Mongolia_IA_Xianbei	Guanzhuang	China_WLR_BA	0.007	1.176	11102	10947	214996
Mbuti	China_NEastAsia_Coastal_EN	Guanzhuang	China_WLR_BA	0.005	1.192	15317	15163	293364
Mbuti	Vietnam_N_all_published	Guanzhuang	China_WLR_BA	0.0169	1.197	1534	1482	29995
Mbuti	Even	Guanzhuang	China_WLR_BA	0.0046	1.204	16518	16366	317518
Mbuti	Ukraine_Scythian	Guanzhuang	China_WLR_BA	0.0056	1.209	15226	15056	306684
Mbuti	Kazakhstan_IA_Saka_dup	Guanzhuang	China_WLR_BA	0.0143	1.211	2170	2109	43153
Mbuti	Russia_IA_2	Guanzhuang	China_WLR_BA	0.007	1.211	11979	11813	235698
Mbuti	Israel_Natufian_published	Guanzhuang	China_WLR_BA	0.014	1.242	2398	2332	48128
Mbuti	Mongolia_Tuv_Xiongnu	Guanzhuang	China_WLR_BA	0.0065	1.278	14676	14485	281383
Mbuti	Mongolia_Khentii_Xiongnu_daughter	Guanzhuang	China_WLR_BA	0.0087	1.298	8900	8747	169916
Mbuti	Russia_KuengaRiver_N_2	Guanzhuang	China_WLR_BA	0.0072	1.316	15264	15045	290245
Mbuti	China_AR_EN	Guanzhuang	China_WLR_BA	0.0104	1.333	5345	5236	102950
Mbuti	Mongolia_Bulgan_Xiongnu	Guanzhuang	China_WLR_BA	0.0062	1.335	14450	14271	277064
Mbuti	Jordan_PPNB_published	Guanzhuang	China_WLR_BA	0.0171	1.372	1960	1894	40317
Mbuti	Mongolia_Selenge_XiongnuMedieval_o1	Guanzhuang	China_WLR_BA	0.0122	1.382	4233	4130	82059
Mbuti	Mongolia_Uvs_EIAXiongnuLateMedival	Guanzhuang	China_WLR_BA	0.0052	1.383	15960	15796	315287
Mbuti	Mongolia_EBA_Chemurchek_2	Guanzhuang	China_WLR_BA	0.0067	1.395	12496	12330	250651
Mbuti	Shandong_EN	Guanzhuang	China_WLR_BA	0.0064	1.396	13804	13629	265245
Mbuti	Mongolia_Khovd_MLBAXiongnuLatEMedieval	Guanzhuang	China_WLR_BA	0.0095	1.407	7560	7419	146265
Mbuti	Kazakhstan_Korgantas_IA	Guanzhuang	China_WLR_BA	0.0082	1.485	12970	12760	250128
Mbuti	Bulgaria_BeliBreyag_EBA	Guanzhuang	China_WLR_BA	0.0145	1.493	3512	3412	71199
Mbuti	China_WLR_MN	Guanzhuang	China_WLR_BA	0.007	1.507	16940	16704	322790
Mbuti	China_AmurRiver_BA	Guanzhuang	China_WLR_BA	0.0524	1.514	266	239	4913
Mbuti	Russia_Siberia_UP	Guanzhuang	China_WLR_BA	0.0098	1.531	8427	8263	163837
Mbuti	Mongolia_East_N	Guanzhuang	China_WLR_BA	0.0078	1.611	14279	14056	272848
Mbuti	Mongolia_Sukhbaatar_LatEMedieval	Guanzhuang	China_WLR_BA	0.0056	1.615	16864	16678	322602
Mbuti	Mongolia_EIA_Xiongnu_7	Guanzhuang	China_WLR_BA	0.0096	1.63	10817	10611	207253
Mbuti	Mongolia_Arkhangai_EarlyMedieval	Guanzhuang	China_WLR_BA	0.0058	1.661	16010	15825	319848
Mbuti	Pakistan_Loebanr_IA	Guanzhuang	China_WLR_BA	0.0055	1.692	15773	15600	316189
Mbuti	Bulgaria_C	Guanzhuang	China_WLR_BA	0.0068	1.778	14313	14120	289152
Mbuti	Mongolia_Sukhbaatar_MLBA	Guanzhuang	China_WLR_BA	0.0121	1.789	8750	8541	167417
Mbuti	Mongolia_Bulgan_EarlyMedievalLatEMedieval	Guanzhuang	China_WLR_BA	0.0069	1.814	16330	16106	313198
Mbuti	China_AmurRiver_LPaleolithic	Guanzhuang	China_WLR_BA	0.0093	1.853	12128	11905	235506
Mbuti	Germany_EN_LBK	Guanzhuang	China_WLR_BA	0.0067	1.867	15783	15574	319095
Mbuti	Mongolia_LBA_CenterWest_4_o	Guanzhuang	China_WLR_BA	0.011	1.867	11241	10998	215138
Mbuti	China_WLR_BA_o	Guanzhuang	China_WLR_BA	0.0119	2.014	11747	11471	224526
Mbuti	Mongolia_Tuv_LatEMedieval	Guanzhuang	China_WLR_BA	0.009	2.062	14363	14107	276243
Mbuti	China_AmurRiver_Mesolithic	Guanzhuang	China_WLR_BA	0.0109	2.074	9356	9153	180376
Mbuti	Greenland_Saqqaq	Guanzhuang	China_WLR_BA	0.0109	2.11	15560	15225	299509
Mbuti	Mongolia_LBA_Ulaanzukh_2_dup	Guanzhuang	China_WLR_BA	0.0124	2.124	12210	11910	231912
Mbuti	Russia_IA_Yankovsky	Guanzhuang	China_WLR_BA	0.0133	2.148	9088	8849	173801
Mbuti	Mongolia_Umungobi_LatEMedieval	Guanzhuang	China_WLR_BA	0.0087	2.155	15689	15419	301603
Mbuti	Russia_Mezhovskaya	Guanzhuang	China_WLR_BA	0.0105	2.155	14636	14331	293024
Mbuti	Russia_Buryatia_Xiongnu	Guanzhuang	China_WLR_BA	0.0084	2.194	15833	15568	303222
Mbuti	Mongolia_EIA_8	Guanzhuang	China_WLR_BA	0.0136	2.233	10948	10654	209214
Mbuti	Mongolia_Arkhangai_Xiongnu_o	Guanzhuang	China_WLR_BA	0.0121	2.24	14021	13686	266815
Mbuti	Mongolia_Dornod_LatEMedieval	Guanzhuang	China_WLR_BA	0.0084	2.274	16288	16015	312838
Mbuti	Mongolia_Chalcolithic_Afanasievo_2	Guanzhuang	China_WLR_BA	0.0142	2.316	10000	9720	191029
Mbuti	Russia_Siberia_Irkutsk_EBA	Guanzhuang	China_WLR_BA	0.0111	2.328	14089	13779	269470
Mbuti	Kazakhstan_IA_Berel_Pazyryk	Guanzhuang	China_WLR_BA	0.0105	2.333	15104	14790	294707
Mbuti	Mongolia_North_N	Guanzhuang	China_WLR_BA	0.0097	2.334	15589	15289	298344
Mbuti	Jordan_EBA	Guanzhuang	China_WLR_BA	0.0111	2.362	11393	11142	232123
Mbuti	China_AmurRiver_EarlyN	Guanzhuang	China_WLR_BA	0.0143	2.598	10389	10096	198809
Mbuti	Russia_MN_Boisman	Guanzhuang	China_WLR_BA	0.011	2.675	14773	14451	281134
Mbuti	China_AmurRiver_N	Guanzhuang	China_WLR_BA	0.0132	2.8	11823	11515	227050
Mbuti	Mongolia_Khentii_LatEMedieval	Guanzhuang	China_WLR_BA	0.0132	2.843	14291	13919	273250
Mbuti	Mongolia_Arkhangai_XiongnuEarlyMedieval_2	Guanzhuang	China_WLR_BA	0.0149	3.007	12043	11690	239254
Mbuti	Mongolia_Sukhbaatar_MLBAXiongnuLatEMedieval	Guanzhuang	China_WLR_BA	0.0109	3.053	16745	16383	318551
Mbuti	China_NEastAsia_Inland_EN	Guanzhuang	China_WLR_BA	0.0218	3.75	11730	11230	224744
Mbuti	Yumin	Guanzhuang	China_WLR_BA	0.0218	3.75	11730	11230	224744
Mbuti	Mongolia_EIA_SlabGrave_1	Guanzhuang	China_WLR_BA	0.0136	3.92	16544	16101	313799
Mbuti	Mongolia_LBA_Ulaanzukh_2	Guanzhuang	China_WLR_BA	0.0211	4.503	13172	12627	249025

## Sheet: I
Table S2I. f4(Mbuti, Reference; X, Guanzhuang) to evaluate the genetic divergence between the Guanzhuang population and population X. The 'Reference' group consists of 287 ancient and contemporary populations, while population X includes ancient populations from various regions of East Asia. |Z|>3 indicates the significant values, highlighted in Datas by blue (positive) and red (negative) ; 2<|Z|…
f4(Mbuti, Reference; Guanzhuang, China_WLR_LN)
pop1	pop2	pop3	pop4	f4	Z	ABAB	ABBA	SNPs
Mbuti	JPT	Guanzhuang	China_WLR_LN	-0.0147	-5.638	26057	26833	504369
Mbuti	Taiwan_Liangdao_LatePaleolithic	Guanzhuang	China_WLR_LN	-0.0448	-5.338	3560	3894	68376
Mbuti	CHB	Guanzhuang	China_WLR_LN	-0.0107	-4.226	26146	26713	504369
Mbuti	CHS	Guanzhuang	China_WLR_LN	-0.0106	-4.155	26142	26704	504369
Mbuti	CDX	Guanzhuang	China_WLR_LN	-0.0098	-3.797	26048	26562	504369
Mbuti	KHV	Guanzhuang	China_WLR_LN	-0.0095	-3.748	26056	26558	504369
Mbuti	China_Lahu	Guanzhuang	China_WLR_LN	-0.0122	-3.604	25205	25827	491378
Mbuti	Nepal_Chokhopani_2800BP	Guanzhuang	China_WLR_LN	-0.0147	-3.505	25877	26646	503757
Mbuti	Malaysia_historical	Guanzhuang	China_WLR_LN	-0.0174	-3.056	10912	11299	215364
Mbuti	Sardinian	Guanzhuang	China_WLR_LN	-0.0094	-3.045	23916	24369	491431
Mbuti	China_Xinjian_IA	Guanzhuang	China_WLR_LN	-0.0116	-2.993	17990	18412	359109
Mbuti	Dai	Guanzhuang	China_WLR_LN	-0.0084	-2.895	26058	26502	504368
Mbuti	Chechen	Guanzhuang	China_WLR_LN	-0.0108	-2.87	23885	24408	490284
Mbuti	Madiga	Guanzhuang	China_WLR_LN	-0.0086	-2.87	24249	24668	491405
Mbuti	Tibetan	Guanzhuang	China_WLR_LN	-0.009	-2.816	25195	25654	491396
Mbuti	Karitiana	Guanzhuang	China_WLR_LN	-0.0095	-2.762	25027	25505	491418
Mbuti	Mixtec_1	Guanzhuang	China_WLR_LN	-0.0102	-2.668	24819	25329	489814
Mbuti	Kusunda	Guanzhuang	China_WLR_LN	-0.0089	-2.66	24801	25247	491352
Mbuti	Lebanon_MBA	Guanzhuang	China_WLR_LN	-0.0079	-2.564	24411	24799	500788
Mbuti	Atayal	Guanzhuang	China_WLR_LN	-0.0098	-2.563	25255	25756	490546
Mbuti	Uyghur	Guanzhuang	China_WLR_LN	-0.0072	-2.393	24642	24998	491398
Mbuti	LG	Guanzhuang	China_WLR_LN	-0.0093	-2.345	23368	23808	451778
Mbuti	She	Guanzhuang	China_WLR_LN	-0.0062	-2.31	26243	26571	504355
Mbuti	Yadava	Guanzhuang	China_WLR_LN	-0.0072	-2.31	24262	24614	491391
Mbuti	Indonesia_LN_BA_IA	Guanzhuang	China_WLR_LN	-0.0242	-2.263	2167	2275	45108
Mbuti	Tujia	Guanzhuang	China_WLR_LN	-0.0061	-2.229	26223	26546	504357
Mbuti	USA_WA_Kennewick	Guanzhuang	China_WLR_LN	-0.0106	-2.201	15440	15769	305103
Mbuti	Relli_1	Guanzhuang	China_WLR_LN	-0.0082	-2.183	24298	24698	490949
Mbuti	GaoHuaHua	Guanzhuang	China_WLR_LN	-0.0085	-2.163	21394	21760	415219
Mbuti	Kazakhstan_Central_Saka	Guanzhuang	China_WLR_LN	-0.0074	-2.153	24359	24721	484639
Mbuti	Mongola	Guanzhuang	China_WLR_LN	-0.007	-2.141	25362	25717	491409
Mbuti	Maori	Guanzhuang	China_WLR_LN	-0.0076	-2.105	24365	24739	490111
Mbuti	Quechua	Guanzhuang	China_WLR_LN	-0.007	-2.097	25081	25437	491386
Mbuti	Mexico_Zapotec	Guanzhuang	China_WLR_LN	-0.0067	-2.068	25081	25418	491376
Mbuti	Russia_KolymaRiver_LN_1d	Guanzhuang	China_WLR_LN	-0.012	-2.061	9465	9695	185129
Mbuti	Balochi	Guanzhuang	China_WLR_LN	-0.0065	-2.058	24004	24316	491365
Mbuti	China_SEastAsia_Island_LN	Guanzhuang	China_WLR_LN	-0.0323	-2.043	1054	1125	22315
Mbuti	Suogang	Guanzhuang	China_WLR_LN	-0.0323	-2.043	1054	1125	22315
Mbuti	Palestinian	Guanzhuang	China_WLR_LN	-0.0059	-2.03	23655	23936	491433
Mbuti	Bengali	Guanzhuang	China_WLR_LN	-0.0064	-2.001	24349	24663	491386
Mbuti	Bulgarian	Guanzhuang	China_WLR_LN	-0.0064	-1.999	24008	24320	491334
Mbuti	Russia_Potapovka	Guanzhuang	China_WLR_LN	-0.0193	-1.985	2986	3104	63090
Mbuti	China_Tianyuan	Guanzhuang	China_WLR_LN	-0.0092	-1.984	17715	18044	362663
Mbuti	Poland_Globular_Amphora_published	Guanzhuang	China_WLR_LN	-0.0267	-1.966	1369	1444	29106
Mbuti	Kazakhstan_Karakhanid	Guanzhuang	China_WLR_LN	-0.0094	-1.96	13903	14168	280196
Mbuti	Brahui	Guanzhuang	China_WLR_LN	-0.0062	-1.953	23960	24257	491396
Mbuti	Shenxian	Guanzhuang	China_WLR_LN	-0.0103	-1.934	12644	12907	252189
Mbuti	Kinh	Guanzhuang	China_WLR_LN	-0.0062	-1.922	25425	25743	491366
Mbuti	Russia_Tagar	Guanzhuang	China_WLR_LN	-0.0056	-1.911	24949	25231	502344
Mbuti	Kazakhstan_Kumsay_EBA	Guanzhuang	China_WLR_LN	-0.0069	-1.908	19970	20246	404050
Mbuti	Basque	Guanzhuang	China_WLR_LN	-0.0062	-1.906	24055	24356	491407
Mbuti	Makrani	Guanzhuang	China_WLR_LN	-0.0062	-1.902	23862	24159	491386
Mbuti	Kapu	Guanzhuang	China_WLR_LN	-0.006	-1.894	24317	24610	491403
Mbuti	Russian	Guanzhuang	China_WLR_LN	-0.006	-1.892	24264	24559	491418
Mbuti	Kazakhstan_Kipchak1	Guanzhuang	China_WLR_LN	-0.0085	-1.886	16839	17127	342250
Mbuti	English	Guanzhuang	China_WLR_LN	-0.006	-1.885	24146	24436	491399
Mbuti	Cambodian	Guanzhuang	China_WLR_LN	-0.0061	-1.867	25179	25487	491403
Mbuti	Russia_Lokomotiv_Eneolithic	Guanzhuang	China_WLR_LN	-0.0069	-1.86	23025	23346	447986
Mbuti	Burusho	Guanzhuang	China_WLR_LN	-0.0056	-1.849	24283	24557	491363
Mbuti	Germany_EBA_Unetice	Guanzhuang	China_WLR_LN	-0.0064	-1.846	22299	22585	456462
Mbuti	Orcadian	Guanzhuang	China_WLR_LN	-0.0061	-1.841	24148	24446	491393
Mbuti	Ami	Guanzhuang	China_WLR_LN	-0.0063	-1.835	25453	25774	491390
Mbuti	Italy_Sicily_HG_OrienteC	Guanzhuang	China_WLR_LN	-0.0279	-1.828	1138	1203	23484
Mbuti	Hungarian	Guanzhuang	China_WLR_LN	-0.0059	-1.825	24080	24367	491374
Mbuti	Kazakhstan_Nomad_Hun_Sarmatian	Guanzhuang	China_WLR_LN	-0.0074	-1.822	22069	22398	431604
Mbuti	French	Guanzhuang	China_WLR_LN	-0.0057	-1.82	24150	24425	491436
Mbuti	Baojianshan	Guanzhuang	China_WLR_LN	-0.0086	-1.82	16008	16286	320577
Mbuti	USA_Anzick_realigned	Guanzhuang	China_WLR_LN	-0.0079	-1.819	25562	25970	499368
Mbuti	Xitoucun	Guanzhuang	China_WLR_LN	-0.0091	-1.813	10651	10846	213419
Mbuti	Russia_Samara_EBA_Yamnaya_published2	Guanzhuang	China_WLR_LN	-0.0078	-1.81	23015	23379	470466
Mbuti	Russia_AginBuryat_N	Guanzhuang	China_WLR_LN	-0.0107	-1.779	8812	9003	171369
Mbuti	Hawaiian	Guanzhuang	China_WLR_LN	-0.0064	-1.769	25126	25448	489941
Mbuti	Hazara	Guanzhuang	China_WLR_LN	-0.0058	-1.769	24761	25048	491374
Mbuti	Tajik	Guanzhuang	China_WLR_LN	-0.0059	-1.764	24186	24471	491411
Mbuti	Miao	Guanzhuang	China_WLR_LN	-0.0059	-1.762	25500	25801	491409
Mbuti	Armenian	Guanzhuang	China_WLR_LN	-0.0057	-1.749	24027	24303	491397
Mbuti	Russia_EBA_o1	Guanzhuang	China_WLR_LN	-0.0131	-1.737	4783	4910	98639
Mbuti	Russia_Shamanka_Eneolithic	Guanzhuang	China_WLR_LN	-0.0049	-1.723	26086	26345	504313
Mbuti	Kazakhstan_Karluk_1	Guanzhuang	China_WLR_LN	-0.007	-1.699	23653	23989	469786
Mbuti	Korean	Guanzhuang	China_WLR_LN	-0.0055	-1.686	25508	25793	491406
Mbuti	Japan_Jomon	Guanzhuang	China_WLR_LN	-0.0077	-1.682	20248	20563	401294
Mbuti	Sherpa	Guanzhuang	China_WLR_LN	-0.0056	-1.679	25406	25693	491395
Mbuti	Tonga_2700BP	Guanzhuang	China_WLR_LN	-0.0146	-1.677	3606	3713	72013
Mbuti	Naxi	Guanzhuang	China_WLR_LN	-0.005	-1.675	25506	25765	491425
Mbuti	China_SEastAsia_Coastal_Historic	Guanzhuang	China_WLR_LN	-0.0124	-1.668	5705	5848	114981
Mbuti	Han	Guanzhuang	China_WLR_LN	-0.005	-1.667	25555	25812	491431
Mbuti	Mansi	Guanzhuang	China_WLR_LN	-0.0052	-1.639	24778	25037	491409
Mbuti	Mongolia_Tuv_EIA	Guanzhuang	China_WLR_LN	-0.0085	-1.629	12278	12488	239383
Mbuti	Kyrgyzstan_Medieval_Nomad_o	Guanzhuang	China_WLR_LN	-0.0086	-1.625	10589	10773	210254
Mbuti	Xibo	Guanzhuang	China_WLR_LN	-0.0044	-1.621	26189	26422	504355
Mbuti	Tonga_2500BP	Guanzhuang	China_WLR_LN	-0.0127	-1.62	4802	4926	94978
Mbuti	Estonian	Guanzhuang	China_WLR_LN	-0.0051	-1.619	24195	24444	491404
Mbuti	Buryat	Guanzhuang	China_WLR_LN	-0.0047	-1.617	25975	26221	504362
Mbuti	Tuscan_1	Guanzhuang	China_WLR_LN	-0.0054	-1.614	24048	24308	491391
Mbuti	Koryak	Guanzhuang	China_WLR_LN	-0.006	-1.613	25980	26295	504345
Mbuti	Guanzhuang_o1	Guanzhuang	China_WLR_LN	-0.0356	-1.612	516	554	10095
Mbuti	BedouinB	Guanzhuang	China_WLR_LN	-0.0051	-1.597	23681	23923	491369
Mbuti	China_SEastAsia_Island_EN	Guanzhuang	China_WLR_LN	-0.0067	-1.596	19045	19302	377585
Mbuti	Kyrgyzstan_TianShan_Hun	Guanzhuang	China_WLR_LN	-0.0042	-1.579	25252	25463	504286
Mbuti	Igorot	Guanzhuang	China_WLR_LN	-0.0053	-1.577	25379	25651	491388
Mbuti	Chane	Guanzhuang	China_WLR_LN	-0.0059	-1.574	25095	25395	490705
Mbuti	Kazakhstan_Nomad_HP	Guanzhuang	China_WLR_LN	-0.0057	-1.571	25049	25335	487195
Mbuti	Mongolia_Xiongnu_o2	Guanzhuang	China_WLR_LN	-0.0061	-1.566	23074	23357	464293
Mbuti	Liangdao2	Guanzhuang	China_WLR_LN	-0.0071	-1.566	18515	18778	367213
Mbuti	Russia_DevilsCave_N	Guanzhuang	China_WLR_LN	-0.0057	-1.561	26196	26498	504230
Mbuti	Pathan	Guanzhuang	China_WLR_LN	-0.0048	-1.543	24217	24451	491414
Mbuti	Thai	Guanzhuang	China_WLR_LN	-0.0052	-1.537	25249	25511	491396
Mbuti	Lezgin	Guanzhuang	China_WLR_LN	-0.005	-1.522	24064	24304	491414
Mbuti	Khonda_Dora	Guanzhuang	China_WLR_LN	-0.0055	-1.518	24533	24806	490826
Mbuti	Dusun	Guanzhuang	China_WLR_LN	-0.0051	-1.514	25350	25611	491359
Mbuti	China_YR_LBIA	Guanzhuang	China_WLR_LN	-0.0047	-1.505	26068	26312	500410
Mbuti	Hezhen	Guanzhuang	China_WLR_LN	-0.0051	-1.495	25385	25646	491406
Mbuti	Tanshishan	Guanzhuang	China_WLR_LN	-0.0093	-1.488	7254	7390	145178
Mbuti	Russia_BA_Okunevo	Guanzhuang	China_WLR_LN	-0.0042	-1.487	25434	25651	504240
Mbuti	China_SEastAsia_Coastal_LN	Guanzhuang	China_WLR_LN	-0.0066	-1.484	12995	13167	257928
Mbuti	Tu	Guanzhuang	China_WLR_LN	-0.0039	-1.472	26157	26361	504356
Mbuti	Turkmenistan_C_Namazga	Guanzhuang	China_WLR_LN	-0.0068	-1.466	14081	14273	295946
Mbuti	Kazakhstan_Turk	Guanzhuang	China_WLR_LN	-0.006	-1.464	22800	23074	457293
Mbuti	Laos_BA	Guanzhuang	China_WLR_LN	-0.009	-1.436	7844	7986	156202
Mbuti	Brahmin	Guanzhuang	China_WLR_LN	-0.0045	-1.433	24188	24405	491407
Mbuti	Yakut	Guanzhuang	China_WLR_LN	-0.0045	-1.432	25266	25497	491392
Mbuti	Australian	Guanzhuang	China_WLR_LN	-0.0049	-1.421	24287	24529	491310
Mbuti	Punjabi	Guanzhuang	China_WLR_LN	-0.0041	-1.406	24298	24500	491437
Mbuti	Russia_KolymaRiver_LN	Guanzhuang	China_WLR_LN	-0.0051	-1.403	26061	26327	504287
Mbuti	Kazakhstan_Central_Steppe_EMBA	Guanzhuang	China_WLR_LN	-0.0049	-1.381	25439	25691	504195
Mbuti	Vietnam_LN	Guanzhuang	China_WLR_LN	-0.0078	-1.38	8380	8513	168337
Mbuti	Qihe3	Guanzhuang	China_WLR_LN	-0.0071	-1.377	13132	13318	261565
Mbuti	Russia_CentralYakutia_LN	Guanzhuang	China_WLR_LN	-0.0054	-1.367	25329	25606	489987
Mbuti	Spanish	Guanzhuang	China_WLR_LN	-0.0043	-1.363	24046	24254	491361
Mbuti	Spain_ElMiron	Guanzhuang	China_WLR_LN	-0.0076	-1.357	11344	11517	239061
Mbuti	Russia_KadalinkaRiver_N	Guanzhuang	China_WLR_LN	-0.0057	-1.349	24403	24681	471292
Mbuti	Finnish	Guanzhuang	China_WLR_LN	-0.0041	-1.348	24269	24471	491432
Mbuti	Kazakhstan_Korgantas_IA	Guanzhuang	China_WLR_LN	-0.0061	-1.34	19648	19888	383226
Mbuti	China_Upper_YR_LN	Guanzhuang	China_WLR_LN	-0.0043	-1.333	26153	26380	499946
Mbuti	Russia_AngaraRiver_EN	Guanzhuang	China_WLR_LN	-0.0056	-1.333	24574	24852	477101
Mbuti	Cretan	Guanzhuang	China_WLR_LN	-0.0042	-1.331	23972	24175	491369
Mbuti	Greece_BA_Mycenaean	Guanzhuang	China_WLR_LN	-0.0068	-1.324	8534	8652	191859
Mbuti	Nepal_Samdzong_1500BP	Guanzhuang	China_WLR_LN	-0.0043	-1.317	26090	26315	504101
Mbuti	Russia_Ust_Ishim	Guanzhuang	China_WLR_LN	-0.005	-1.305	22620	22848	463369
Mbuti	Mongolia_Bulgan_EarlyMedieval	Guanzhuang	China_WLR_LN	-0.0059	-1.304	18788	19013	367679
Mbuti	Icelandic	Guanzhuang	China_WLR_LN	-0.0041	-1.298	24201	24401	491412
Mbuti	Chipewyan	Guanzhuang	China_WLR_LN	-0.0045	-1.294	25192	25418	491397
Mbuti	Kongo	Guanzhuang	China_WLR_LN	-0.004	-1.286	19591	19749	490031
Mbuti	Liangdao1	Guanzhuang	China_WLR_LN	-0.0084	-1.27	7220	7343	149834
Mbuti	Russia_Alan	Guanzhuang	China_WLR_LN	-0.0041	-1.26	24641	24845	501245
Mbuti	Mongolia_Xiongnu_o1	Guanzhuang	China_WLR_LN	-0.0044	-1.259	26088	26318	504030
Mbuti	Burmese	Guanzhuang	China_WLR_LN	-0.004	-1.256	25297	25501	491403
Mbuti	Druze	Guanzhuang	China_WLR_LN	-0.004	-1.251	23900	24093	491377
Mbuti	Chukchi	Guanzhuang	China_WLR_LN	-0.0045	-1.225	24750	24975	490879
Mbuti	Eskimo_Sireniki	Guanzhuang	China_WLR_LN	-0.0041	-1.19	25273	25480	491414
Mbuti	Turkmenistan_Gonur_BA_1	Guanzhuang	China_WLR_LN	-0.0039	-1.171	19487	19640	399823
Mbuti	Vietnam_N_published	Guanzhuang	China_WLR_LN	-0.0144	-1.167	1834	1888	37024
Mbuti	Russia_UstIda_LN	Guanzhuang	China_WLR_LN	-0.0041	-1.151	23750	23944	466183
Mbuti	JXNT	Guanzhuang	China_WLR_LN	-0.0043	-1.132	23765	23970	457508
Mbuti	Kazakhstan_Nomad_IA	Guanzhuang	China_WLR_LN	-0.0049	-1.129	17283	17452	347774
Mbuti	Turkey_EBA_II	Guanzhuang	China_WLR_LN	-0.004	-1.108	21631	21805	448955
Mbuti	Jew_Yemenite	Guanzhuang	China_WLR_LN	-0.0034	-1.093	23716	23877	491401
Mbuti	Germany_CordedWare	Guanzhuang	China_WLR_LN	-0.0034	-1.082	24006	24169	486889
Mbuti	Russia_AfontovaGora3	Guanzhuang	China_WLR_LN	-0.0084	-1.079	4450	4525	95221
Mbuti	Russia_MBA_Poltavka	Guanzhuang	China_WLR_LN	-0.0043	-1.079	19179	19344	390561
Mbuti	Tubalar	Guanzhuang	China_WLR_LN	-0.0033	-1.071	24957	25125	491420
Mbuti	Russia_Buryatia_Xiongnu_mother	Guanzhuang	China_WLR_LN	-0.0053	-1.068	15709	15877	306364
Mbuti	Turkish	Guanzhuang	China_WLR_LN	-0.0034	-1.065	24135	24299	491412
Mbuti	China_Wuzhuangguoliang_LN	Guanzhuang	China_WLR_LN	-0.0144	-1.058	1054	1084	21419
Mbuti	Ukraine_Scythian	Guanzhuang	China_WLR_LN	-0.0038	-1.054	23418	23599	475606
Mbuti	Daur	Guanzhuang	China_WLR_LN	-0.004	-1.047	25367	25572	490198
Mbuti	Nepal_Mebrak_2125BP	Guanzhuang	China_WLR_LN	-0.0049	-1.046	16916	17083	326426
Mbuti	Russia_UstIda_EBA	Guanzhuang	China_WLR_LN	-0.0042	-1.043	19432	19596	381982
Mbuti	Mixe	Guanzhuang	China_WLR_LN	-0.0035	-1.041	25166	25340	491424
Mbuti	Sindhi_Pakistan	Guanzhuang	China_WLR_LN	-0.0033	-1.041	24263	24426	491384
Mbuti	Sweden_Motala_HG	Guanzhuang	China_WLR_LN	-0.0036	-1.04	22263	22423	452693
Mbuti	Russia_KuengaRiver_N_1	Guanzhuang	China_WLR_LN	-0.0123	-1.035	1719	1762	34000
Mbuti	Russia_Shamanka_EBA	Guanzhuang	China_WLR_LN	-0.0038	-1.033	23795	23975	463414
Mbuti	Papuan	Guanzhuang	China_WLR_LN	-0.0034	-1.026	24384	24548	491436
Mbuti	Pima	Guanzhuang	China_WLR_LN	-0.0035	-1.005	25207	25386	491369
Mbuti	Kazakhstan_Wusun	Guanzhuang	China_WLR_LN	-0.0039	-0.989	22609	22787	457471
Mbuti	Cree1	Guanzhuang	China_WLR_LN	-0.0038	-0.985	24801	24989	490476
Mbuti	Samaritan	Guanzhuang	China_WLR_LN	-0.0037	-0.983	23709	23883	488602
Mbuti	Russia_ArgunRiver_M	Guanzhuang	China_WLR_LN	-0.0043	-0.98	25624	25847	495699
Mbuti	Irula	Guanzhuang	China_WLR_LN	-0.0031	-0.966	24320	24473	491401
Mbuti	Kazakhstan_GoldenHordeAsian	Guanzhuang	China_WLR_LN	-0.004	-0.952	24592	24788	478017
Mbuti	Georgian	Guanzhuang	China_WLR_LN	-0.0031	-0.948	24068	24216	491415
Mbuti	Russia_Kurma_EBA	Guanzhuang	China_WLR_LN	-0.0042	-0.936	15613	15747	305819
Mbuti	Russia_Siberia_Lena_EBA_o	Guanzhuang	China_WLR_LN	-0.0129	-0.926	1413	1450	28709
Mbuti	Kazakhstan_Kangju_o1	Guanzhuang	China_WLR_LN	-0.004	-0.919	15924	16053	325912
Mbuti	Iranian	Guanzhuang	China_WLR_LN	-0.0028	-0.903	24007	24143	491422
Mbuti	Canada_LateDorset	Guanzhuang	China_WLR_LN	-0.0062	-0.9	6220	6297	123171
Mbuti	Guam_LateUnai_Ritidian	Guanzhuang	China_WLR_LN	-0.0094	-0.895	2354	2399	48960
Mbuti	Iran_C_SehGabi	Guanzhuang	China_WLR_LN	-0.0029	-0.886	21641	21768	442245
Mbuti	Russia_Blagovechensk_IA	Guanzhuang	China_WLR_LN	-0.005	-0.886	10683	10790	205394
Mbuti	Jordanian	Guanzhuang	China_WLR_LN	-0.0026	-0.883	23754	23876	491433
Mbuti	Surui	Guanzhuang	China_WLR_LN	-0.0032	-0.855	25269	25431	491368
Mbuti	Russia_Siberia_Tenisei_EBA	Guanzhuang	China_WLR_LN	-0.0042	-0.845	16324	16462	323555
Mbuti	Bougainville	Guanzhuang	China_WLR_LN	-0.0028	-0.83	24562	24701	491227
Mbuti	Russia_Samara_EBA_Yamnaya_published	Guanzhuang	China_WLR_LN	-0.0042	-0.83	11736	11836	242332
Mbuti	Aleut	Guanzhuang	China_WLR_LN	-0.0027	-0.828	24918	25054	491422
Mbuti	Mongolia_IA_Xianbei	Guanzhuang	China_WLR_LN	-0.0041	-0.82	16497	16631	325017
Mbuti	China_WLR_BA_o	Guanzhuang	China_WLR_LN	-0.004	-0.816	17626	17765	343057
Mbuti	Kurumba	Guanzhuang	China_WLR_LN	-0.0031	-0.796	24215	24364	488545
Mbuti	Russia_Abkhasian	Guanzhuang	China_WLR_LN	-0.0026	-0.789	24135	24261	491406
Mbuti	Dungan	Guanzhuang	China_WLR_LN	-0.0028	-0.781	26160	26307	504230
Mbuti	Moldova_Glinoe_Scythian	Guanzhuang	China_WLR_LN	-0.0026	-0.777	23705	23828	480586
Mbuti	Dushan	Guanzhuang	China_WLR_LN	-0.0041	-0.767	10802	10892	218002
Mbuti	Bulgaria_IA	Guanzhuang	China_WLR_LN	-0.0041	-0.754	11966	12064	245246
Mbuti	Slovakia_Poprad	Guanzhuang	China_WLR_LN	-0.0041	-0.746	10506	10592	214181
Mbuti	Bergamo	Guanzhuang	China_WLR_LN	-0.0027	-0.74	24063	24191	490239
Mbuti	Altaian	Guanzhuang	China_WLR_LN	-0.0027	-0.729	25102	25239	490527
Mbuti	China_YR_MN	Guanzhuang	China_WLR_LN	-0.0025	-0.728	26186	26316	501318
Mbuti	China_YR_LN	Guanzhuang	China_WLR_LN	-0.0021	-0.721	26350	26459	503759
Mbuti	China_Shimao_LN	Guanzhuang	China_WLR_LN	-0.0025	-0.718	26086	26218	498136
Mbuti	China_SEastAsia_Coastal_EN	Guanzhuang	China_WLR_LN	-0.005	-0.713	5691	5749	115205
Mbuti	Turkmenistan_IA	Guanzhuang	China_WLR_LN	-0.0031	-0.689	20745	20874	425112
Mbuti	Mongolia_Dornod_PreBronze	Guanzhuang	China_WLR_LN	-0.006	-0.674	3977	4025	77932
Mbuti	Russia_Krasnoyarsk_BA	Guanzhuang	China_WLR_LN	-0.0028	-0.664	26034	26182	504115
Mbuti	Mayan	Guanzhuang	China_WLR_LN	-0.0022	-0.654	25241	25354	491335
Mbuti	Eskimo_Naukan	Guanzhuang	China_WLR_LN	-0.0023	-0.651	25317	25434	491395
Mbuti	Mongolia_Dornod_Xiongnu	Guanzhuang	China_WLR_LN	-0.0029	-0.651	20770	20891	401336
Mbuti	Russia_HG_Karelia	Guanzhuang	China_WLR_LN	-0.0028	-0.634	21678	21798	439776
Mbuti	Laos_LN_BA	Guanzhuang	China_WLR_LN	-0.0028	-0.622	19265	19373	375583
Mbuti	Vietnam_BA	Guanzhuang	China_WLR_LN	-0.0043	-0.614	6525	6582	128034
Mbuti	Mala	Guanzhuang	China_WLR_LN	-0.0018	-0.61	24423	24511	491422
Mbuti	Polish	Guanzhuang	China_WLR_LN	-0.0023	-0.603	24185	24294	490503
Mbuti	Laos_Hoabinhian	Guanzhuang	China_WLR_LN	-0.0033	-0.597	10835	10907	222753
Mbuti	Mongolia_Selenge_XiongnuMedieval_o1	Guanzhuang	China_WLR_LN	-0.004	-0.584	6395	6446	124335
Mbuti	Mongolia_LBA_CenterWest_4_o	Guanzhuang	China_WLR_LN	-0.0028	-0.583	16771	16865	325906
Mbuti	Japanese	Guanzhuang	China_WLR_LN	-0.0018	-0.577	25567	25658	491426
Mbuti	Mongolia_Bulgan_Xiongnu	Guanzhuang	China_WLR_LN	-0.0022	-0.573	21874	21971	425971
Mbuti	Russia_CentralYakutia_IA	Guanzhuang	China_WLR_LN	-0.0069	-0.567	1752	1776	33351
Mbuti	Lemande	Guanzhuang	China_WLR_LN	-0.0014	-0.566	19861	19918	491396
Mbuti	Germany_BellBeaker	Guanzhuang	China_WLR_LN	-0.0015	-0.546	24432	24505	495046
Mbuti	Bulgaria_BeliBreyag_EBA	Guanzhuang	China_WLR_LN	-0.004	-0.538	5020	5061	104896
Mbuti	Russia_Srubnaya	Guanzhuang	China_WLR_LN	-0.0016	-0.536	24360	24437	492851
Mbuti	Russia_Samara_EBA_Yamnaya	Guanzhuang	China_WLR_LN	-0.0017	-0.53	23679	23758	480089
Mbuti	Russia_Tuva_IA_AldyBel	Guanzhuang	China_WLR_LN	-0.0023	-0.529	16455	16531	331094
Mbuti	Italy_North_Villabruna_HG	Guanzhuang	China_WLR_LN	-0.0025	-0.526	17623	17713	362361
Mbuti	Kazakhstan_IA_Saka_dup	Guanzhuang	China_WLR_LN	-0.0048	-0.523	3311	3343	66952
Mbuti	China_Upper_YR_IA	Guanzhuang	China_WLR_LN	-0.0018	-0.513	25158	25250	481705
Mbuti	Czech	Guanzhuang	China_WLR_LN	-0.0019	-0.497	24212	24304	490476
Mbuti	Georgia_Kotias	Guanzhuang	China_WLR_LN	-0.002	-0.492	24774	24873	504127
Mbuti	Kazakhstan_ZevakinoChilikta_IA_2	Guanzhuang	China_WLR_LN	-0.0033	-0.481	6632	6676	131918
Mbuti	Turkey_N	Guanzhuang	China_WLR_LN	-0.0014	-0.474	24380	24449	497532
Mbuti	Russia_LenaRiver_EN	Guanzhuang	China_WLR_LN	-0.002	-0.468	22091	22181	423813
Mbuti	Vietnam_N	Guanzhuang	China_WLR_LN	-0.0035	-0.462	4608	4640	90895
Mbuti	Canada_MDorset_published	Guanzhuang	China_WLR_LN	-0.005	-0.441	2235	2258	43645
Mbuti	Hungary_IA_Scythian	Guanzhuang	China_WLR_LN	-0.0016	-0.418	21661	21729	441116
Mbuti	Myanmar_LN_BA_published_lc	Guanzhuang	China_WLR_LN	-0.0121	-0.411	287	294	5577
Mbuti	Mongolia_Ulaanbaatar_EIALatEMedieval	Guanzhuang	China_WLR_LN	-0.0024	-0.407	10704	10754	210173
Mbuti	Mongolia_Khentii_EIA_SlabGrave	Guanzhuang	China_WLR_LN	-0.0042	-0.401	2759	2782	54677
Mbuti	Albanian	Guanzhuang	China_WLR_LN	-0.0015	-0.388	24162	24236	490861
Mbuti	Yi	Guanzhuang	China_WLR_LN	-0.0013	-0.385	25635	25700	491396
Mbuti	Moldova_Cimmerian	Guanzhuang	China_WLR_LN	-0.0016	-0.382	16884	16939	338605
Mbuti	Mongolia_Arkhangai_Xiongnu_o	Guanzhuang	China_WLR_LN	-0.0017	-0.381	21254	21328	409914
Mbuti	Mongolia_East_N	Guanzhuang	China_WLR_LN	-0.0015	-0.372	21650	21714	418189
Mbuti	Ulchi	Guanzhuang	China_WLR_LN	-0.0012	-0.369	25501	25563	491388
Mbuti	Oroqen	Guanzhuang	China_WLR_LN	-0.0012	-0.367	25542	25603	491389
Mbuti	Piapoco	Guanzhuang	China_WLR_LN	-0.0012	-0.36	25251	25311	491358
Mbuti	Vietnam_BA_DongSonCulture	Guanzhuang	China_WLR_LN	-0.0019	-0.338	8590	8623	179372
Mbuti	Vietnam_BA_all	Guanzhuang	China_WLR_LN	-0.0019	-0.33	9786	9824	191083
Mbuti	Adygei	Guanzhuang	China_WLR_LN	-0.001	-0.321	24234	24283	491388
Mbuti	Mongolia_Sukhbaatar_MLBA	Guanzhuang	China_WLR_LN	-0.0015	-0.3	13007	13047	253119
Mbuti	Vietnam_historical	Guanzhuang	China_WLR_LN	-0.0021	-0.293	5814	5838	112812
Mbuti	Mongolia_Arkhangai_XiongnuEarlyMedieval_1	Guanzhuang	China_WLR_LN	-0.0013	-0.273	19162	19211	389357
Mbuti	Vietnam_N_all_published	Guanzhuang	China_WLR_LN	-0.003	-0.269	2212	2225	44338
Mbuti	Russia_NorthOssetian	Guanzhuang	China_WLR_LN	-0.0009	-0.266	24263	24305	491412
Mbuti	China_HMMH_MN	Guanzhuang	China_WLR_LN	-0.0013	-0.265	16410	16453	319317
Mbuti	China_AmurRiver_LPaleolithic	Guanzhuang	China_WLR_LN	-0.001	-0.255	18220	18255	357197
Mbuti	Mongolia_Arkhangai_XiongnuEarlyMedieval_3	Guanzhuang	China_WLR_LN	-0.0007	-0.25	25294	25331	495094
Mbuti	Taiwan_Hanben_IA_lc	Guanzhuang	China_WLR_LN	-0.0033	-0.247	1543	1553	30078
Mbuti	Russia_SaltovoMayaki	Guanzhuang	China_WLR_LN	-0.0027	-0.238	1889	1899	40040
Mbuti	China_AmurRiver_Mesolithic	Guanzhuang	China_WLR_LN	-0.001	-0.228	13860	13889	271022
Mbuti	BaBanQinCen	Guanzhuang	China_WLR_LN	-0.001	-0.219	14993	15022	293516
Mbuti	China_AR_Xianbei_IA	Guanzhuang	China_WLR_LN	-0.0015	-0.218	6367	6386	123685
Mbuti	Georgia_Satsurblia	Guanzhuang	China_WLR_LN	-0.0009	-0.186	17901	17932	365956
Mbuti	Eskimo_Chaplin	Guanzhuang	China_WLR_LN	-0.0007	-0.182	25427	25461	490928
Mbuti	Russia_UstBelaya_Angara	Guanzhuang	China_WLR_LN	-0.0006	-0.182	24648	24676	477105
Mbuti	Mongolia_Khentii_Xiongnu_daughter	Guanzhuang	China_WLR_LN	-0.0008	-0.167	13235	13257	257101
Mbuti	Mongolia_EIA_Xiongnu_7	Guanzhuang	China_WLR_LN	-0.0008	-0.158	16153	16177	313987
Mbuti	Russia_Andronovo	Guanzhuang	China_WLR_LN	-0.0004	-0.129	24715	24737	500098
Mbuti	Estonia_CordedWare	Guanzhuang	China_WLR_LN	-0.0005	-0.123	22076	22096	450105
Mbuti	Kazakhstan_Nomad_IA_o	Guanzhuang	China_WLR_LN	-0.0008	-0.116	6157	6167	126771
Mbuti	Taiwan_Hanben_IA	Guanzhuang	China_WLR_LN	-0.0003	-0.103	26142	26157	500677
Mbuti	Spain_C	Guanzhuang	China_WLR_LN	-0.0003	-0.101	24285	24299	492185
Mbuti	Russia_KuengaRiver_N_2	Guanzhuang	China_WLR_LN	-0.0004	-0.093	23479	23498	451137
Mbuti	Spain_HG	Guanzhuang	China_WLR_LN	-0.0004	-0.089	20694	20711	419285
Mbuti	Turkmenistan_C_Namazga_1d	Guanzhuang	China_WLR_LN	-0.0014	-0.078	859	862	18083
Mbuti	Kalash	Guanzhuang	China_WLR_LN	-0.0003	-0.077	24340	24353	491410
Mbuti	Mongolia_Arkhangai_MLBAtoEIAorMedieval_o	Guanzhuang	China_WLR_LN	-0.0006	-0.077	4343	4348	83462
Mbuti	Nahua	Guanzhuang	China_WLR_LN	-0.0002	-0.053	25229	25239	490854
Mbuti	Kazakhstan_Wusun_LateSaka_dup	Guanzhuang	China_WLR_LN	-0.0004	-0.052	5245	5249	105560
Mbuti	Kazakhstan_Berel_IA_o3	Guanzhuang	China_WLR_LN	0	-0.007	24991	24992	482800
Mbuti	Russia_IA_EarlySarmatian	Guanzhuang	China_WLR_LN	0.0001	0.021	15329	15326	311649
Mbuti	Mongolia_LBA_Ulaanzukh_2_dup	Guanzhuang	China_WLR_LN	0.0002	0.045	18158	18150	352530
Mbuti	Mongolia_Uvurkhangai_Xiongnu	Guanzhuang	China_WLR_LN	0.0003	0.069	22583	22571	436752
Mbuti	Mongolia_Khovd_MLBAXiongnuLatEMedieval	Guanzhuang	China_WLR_LN	0.0004	0.081	11456	11446	221525
Mbuti	China_AR_IA	Guanzhuang	China_WLR_LN	0.0012	0.085	1195	1193	24212
Mbuti	Mongolia_Tuv_Xiongnu	Guanzhuang	China_WLR_LN	0.0004	0.09	22439	22421	432523
Mbuti	Philippines_RedSlippedPottery	Guanzhuang	China_WLR_LN	0.0023	0.095	449	447	8994
Mbuti	Mongolia_Dundgobi_LatEMedieval	Guanzhuang	China_WLR_LN	0.0004	0.097	17795	17780	345154
Mbuti	Russia_LBA_1	Guanzhuang	China_WLR_LN	0.0015	0.113	1406	1402	28807
Mbuti	Vanuatu_3000BP	Guanzhuang	China_WLR_LN	0.0016	0.153	2542	2534	49345
Mbuti	Russia_MA1_HG	Guanzhuang	China_WLR_LN	0.001	0.212	17364	17329	348577
Mbuti	Russia_Afanasievo	Guanzhuang	China_WLR_LN	0.0006	0.214	24501	24472	493000
Mbuti	Israel_Natufian_published	Guanzhuang	China_WLR_LN	0.0019	0.218	3497	3484	72608
Mbuti	Even	Guanzhuang	China_WLR_LN	0.0007	0.219	25470	25433	491415
Mbuti	Russia_AfontovaGora2	Guanzhuang	China_WLR_LN	0.0031	0.227	1490	1480	29333
Mbuti	LaCen	Guanzhuang	China_WLR_LN	0.001	0.23	16935	16900	331302
Mbuti	Mongolia_Bulgan_LatEMedieval	Guanzhuang	China_WLR_LN	0.0011	0.233	17632	17593	341162
Mbuti	Canada_MDorset	Guanzhuang	China_WLR_LN	0.0032	0.24	1438	1429	29095
Mbuti	Russia_Siberia_UP	Guanzhuang	China_WLR_LN	0.0015	0.293	12459	12422	245643
Mbuti	Russia_MLBA_Sintashta	Guanzhuang	China_WLR_LN	0.0009	0.313	24599	24557	495815
Mbuti	Mongolia_EIA_8	Guanzhuang	China_WLR_LN	0.0016	0.328	16361	16310	316664
Mbuti	Iran_GanjDareh_N	Guanzhuang	China_WLR_LN	0.0011	0.329	22426	22375	459567
Mbuti	Mongolia_Arkhangai_PreBronze	Guanzhuang	China_WLR_LN	0.0016	0.333	16802	16748	325834
Mbuti	Taiwan_Gongguan	Guanzhuang	China_WLR_LN	0.0017	0.34	13768	13722	266689
Mbuti	Russia_Chita_BA	Guanzhuang	China_WLR_LN	0.0032	0.381	3848	3824	74698
Mbuti	Greece_Minoan_Odigitria	Guanzhuang	China_WLR_LN	0.0028	0.382	5081	5052	104412
Mbuti	Russia_Karasuk_oRISE	Guanzhuang	China_WLR_LN	0.0012	0.397	25258	25200	503504
Mbuti	Mongolia_Selenge_Xiongnu	Guanzhuang	China_WLR_LN	0.0019	0.404	19961	19885	382821
Mbuti	Mongolia_Chalcolithic_Afanasievo_1	Guanzhuang	China_WLR_LN	0.0019	0.411	15346	15288	312370
Mbuti	Mongolia_Sukhbaatar_MLBAXiongnuLatEMedieval_sister	Guanzhuang	China_WLR_LN	0.0062	0.428	1367	1351	26158
Mbuti	Russia_EarlyMedieval_Heshui_Mohe_1	Guanzhuang	China_WLR_LN	0.0033	0.44	5402	5367	105755
Mbuti	Russia_Buryatia_PreBronze	Guanzhuang	China_WLR_LN	0.0021	0.45	18324	18247	354297
Mbuti	Greece_Minoan_Lassithi	Guanzhuang	China_WLR_LN	0.0018	0.47	21287	21213	437355
Mbuti	Mongolia_EBA_Ulgii_1_dup	Guanzhuang	China_WLR_LN	0.0021	0.47	21324	21233	416255
Mbuti	China_WLR_BA	Guanzhuang	China_WLR_LN	0.0023	0.479	13785	13723	266255
Mbuti	Kazakhstan_TianShan_Saka	Guanzhuang	China_WLR_LN	0.0061	0.491	1656	1636	33892
Mbuti	Mongolia_Khentii_Xiongnu	Guanzhuang	China_WLR_LN	0.0024	0.526	19893	19798	383674
Mbuti	Armenia_C	Guanzhuang	China_WLR_LN	0.0019	0.546	21895	21814	445584
Mbuti	China_AmurRiver_N	Guanzhuang	China_WLR_LN	0.0022	0.57	17710	17632	343907
Mbuti	Spain_MLN	Guanzhuang	China_WLR_LN	0.0016	0.574	24110	24033	488909
Mbuti	Greenland_Saqqaq	Guanzhuang	China_WLR_LN	0.0027	0.598	23837	23707	463059
Mbuti	Vanuatu_2900BP_all	Guanzhuang	China_WLR_LN	0.005	0.599	4329	4285	83825
Mbuti	Kashmiri_Pandit	Guanzhuang	China_WLR_LN	0.0022	0.608	24281	24173	490321
Mbuti	Germany_EN_LBK	Guanzhuang	China_WLR_LN	0.0018	0.618	24307	24220	493479
Mbuti	Bulgaria_Varna_C	Guanzhuang	China_WLR_LN	0.0036	0.629	8138	8079	168193
Mbuti	Mongolia_Sukhbaatar_LatEMedieval	Guanzhuang	China_WLR_LN	0.0018	0.633	26026	25933	499777
Mbuti	Kazakhstan_IA_Berel_Pazyryk	Guanzhuang	China_WLR_LN	0.0025	0.658	23022	22909	453398
Mbuti	Mongolia_Khuvsgul_XiongnuLatEMedieval_2	Guanzhuang	China_WLR_LN	0.0021	0.661	24284	24183	471189
Mbuti	Thailand_IA	Guanzhuang	China_WLR_LN	0.0172	0.669	429	414	8360
Mbuti	Mongolia_Sukhbaatar_MLBAXiongnuLatEMedieval	Guanzhuang	China_WLR_LN	0.002	0.69	25656	25553	492738
Mbuti	Russia_IA_2	Guanzhuang	China_WLR_LN	0.0033	0.692	18217	18098	360978
Mbuti	Russia_Buryatia_Xiongnu	Guanzhuang	China_WLR_LN	0.0024	0.711	24219	24102	467588
Mbuti	Mongolia_Khuvsgul_XiongnuLatEMedieval_1	Guanzhuang	China_WLR_LN	0.0023	0.713	23033	22925	457689
Mbuti	Kazakhstan_Kimak	Guanzhuang	China_WLR_LN	0.0052	0.714	4885	4835	96578
Mbuti	Russia_MN_Boisman	Guanzhuang	China_WLR_LN	0.0028	0.8	22378	22255	430787
Mbuti	Spain_EN	Guanzhuang	China_WLR_LN	0.0026	0.8	22479	22361	459173
Mbuti	Mongolia_Khovd_MLBAEarlyMedieval	Guanzhuang	China_WLR_LN	0.003	0.809	22445	22312	445962
Mbuti	Bulgaria_C	Guanzhuang	China_WLR_LN	0.0027	0.822	21838	21721	444123
Mbuti	China_AR_EN	Guanzhuang	China_WLR_LN	0.0053	0.864	8061	7976	155744
Mbuti	Russia_Kalmykia_EBA_Yamnaya	Guanzhuang	China_WLR_LN	0.0029	0.866	23612	23476	477239
Mbuti	Armenia_EBA	Guanzhuang	China_WLR_LN	0.0031	0.87	21236	21105	433404
Mbuti	Mongolia_Dornod_LatEMedieval	Guanzhuang	China_WLR_LN	0.0028	0.874	25071	24933	483634
Mbuti	Turkey_MLBA_AssyrianColonyPeriod	Guanzhuang	China_WLR_LN	0.0038	0.893	16052	15930	328908
Mbuti	Mongolia_Umungobi_LatEMedieval	Guanzhuang	China_WLR_LN	0.0029	0.899	24015	23874	464097
Mbuti	Jordan_PPNB_published	Guanzhuang	China_WLR_LN	0.0084	0.92	2892	2844	60244
Mbuti	Mongolia_Uvurkhangai_EIALatEMedieval	Guanzhuang	China_WLR_LN	0.0036	0.928	21675	21521	419445
Mbuti	Mongolia_Arkhangai_EarlyMedieval	Guanzhuang	China_WLR_LN	0.0028	1.013	24712	24573	495005
Mbuti	Longlin	Guanzhuang	China_WLR_LN	0.0101	1.044	3451	3382	69816
Mbuti	China_AmurRiver_BA	Guanzhuang	China_WLR_LN	0.0293	1.046	379	358	7242
Mbuti	Mongolia_Uvs_EIAXiongnuLateMedival	Guanzhuang	China_WLR_LN	0.0033	1.09	24604	24444	487172
Mbuti	Jordan_EBA	Guanzhuang	China_WLR_LN	0.0043	1.097	17140	16992	352953
Mbuti	Shandong_EN	Guanzhuang	China_WLR_LN	0.0042	1.107	20989	20812	404400
Mbuti	Vanuatu_2900BP	Guanzhuang	China_WLR_LN	0.011	1.11	2876	2813	55767
Mbuti	Mongolia_Chalcolithic_Afanasievo_2	Guanzhuang	China_WLR_LN	0.0057	1.183	14859	14689	287795
Mbuti	China_Miaozigou_MN	Guanzhuang	China_WLR_LN	0.0078	1.226	7720	7601	148107
Mbuti	Boshan	Guanzhuang	China_WLR_LN	0.0057	1.253	21111	20872	408378
Mbuti	China_AmurRiver_EarlyN	Guanzhuang	China_WLR_LN	0.0057	1.289	15363	15189	298762
Mbuti	Israel_C	Guanzhuang	China_WLR_LN	0.0041	1.312	22494	22310	459897
Mbuti	Mongolia_Arkhangai_XiongnuEarlyMedieval_2	Guanzhuang	China_WLR_LN	0.0052	1.312	18082	17893	364201
Mbuti	China_WLR_MN	Guanzhuang	China_WLR_LN	0.0052	1.388	26356	26082	500713
Mbuti	Pakistan_Loebanr_IA	Guanzhuang	China_WLR_LN	0.0038	1.422	24271	24089	488645
Mbuti	Yiyang	Guanzhuang	China_WLR_LN	0.0111	1.445	5135	5023	101596
Mbuti	Armenia_LBA	Guanzhuang	China_WLR_LN	0.0078	1.487	10292	10133	213911
Mbuti	Kazakhstan_Botai_Eneolithic	Guanzhuang	China_WLR_LN	0.0061	1.519	19498	19262	386580
Mbuti	Mongolia_EIA_SlabGrave_1	Guanzhuang	China_WLR_LN	0.0047	1.575	25290	25055	484509
Mbuti	Mongolia_Khentii_LatEMedieval	Guanzhuang	China_WLR_LN	0.0063	1.645	21736	21463	418678
Mbuti	Mongolia_North_N	Guanzhuang	China_WLR_LN	0.0058	1.72	23810	23538	458536
Mbuti	Russia_Siberia_Irkutsk_EBA	Guanzhuang	China_WLR_LN	0.0066	1.722	21545	21264	413522
Mbuti	Russia_IA_Yankovsky	Guanzhuang	China_WLR_LN	0.009	1.735	13649	13407	261315
Mbuti	China_NEastAsia_Inland_EN	Guanzhuang	China_WLR_LN	0.0085	1.737	17620	17323	341674
Mbuti	Yumin	Guanzhuang	China_WLR_LN	0.0085	1.737	17620	17323	341674
Mbuti	Mongolia_LBA_Ulaanzukh_2	Guanzhuang	China_WLR_LN	0.0071	1.82	19677	19400	378946
Mbuti	Mongolia_Tuv_LatEMedieval	Guanzhuang	China_WLR_LN	0.0068	1.913	22056	21759	423638
Mbuti	Russia_Mezhovskaya	Guanzhuang	China_WLR_LN	0.0083	2.089	22488	22118	452134
Mbuti	China_NEastAsia_Coastal_EN	Guanzhuang	China_WLR_LN	0.0073	2.126	23508	23167	449957
Mbuti	Mongolia_Bulgan_EarlyMedievalLatEMedieval	Guanzhuang	China_WLR_LN	0.0069	2.252	25197	24851	484049
Mbuti	Mongolia_EBA_Chemurchek_2	Guanzhuang	China_WLR_LN	0.0096	2.433	19029	18668	381932

## Sheet: J
Table S2J. f4(Mbuti, Reference; X, Guanzhuang) to evaluate the genetic divergence between the Guanzhuang population and population X. The 'Reference' group consists of 287 ancient and contemporary populations, while population X includes ancient populations from various regions of East Asia. |Z|>3 indicates the significant values, highlighted in Datas by blue (positive) and red (negative) ; 2<|Z|…
f4(Mbuti, Reference; Guanzhuang, China_WLR_MN)
pop1	pop2	pop3	pop4	f4	Z	ABAB	ABBA	SNPs
Mbuti	KHV	Guanzhuang	China_WLR_MN	-0.0144	-5.47	33729	34716	650685
Mbuti	CHS	Guanzhuang	China_WLR_MN	-0.0144	-5.451	33860	34849	650685
Mbuti	CDX	Guanzhuang	China_WLR_MN	-0.0145	-5.399	33723	34718	650685
Mbuti	Taiwan_Liangdao_LatePaleolithic	Guanzhuang	China_WLR_MN	-0.0379	-4.763	4495	4849	84654
Mbuti	CHB	Guanzhuang	China_WLR_MN	-0.0123	-4.699	33964	34813	650685
Mbuti	RIA	Guanzhuang	China_WLR_MN	-0.0128	-4.65	33395	34259	647384
Mbuti	She	Guanzhuang	China_WLR_MN	-0.0116	-4.166	33934	34731	650665
Mbuti	Kinh	Guanzhuang	China_WLR_MN	-0.0143	-4.101	32716	33664	632228
Mbuti	Tujia	Guanzhuang	China_WLR_MN	-0.0113	-4.033	33945	34719	650670
Mbuti	Dai	Guanzhuang	China_WLR_MN	-0.0119	-3.968	33800	34611	650682
Mbuti	GaoHuaHua	Guanzhuang	China_WLR_MN	-0.0149	-3.965	26727	27538	519804
Mbuti	Atayal	Guanzhuang	China_WLR_MN	-0.0168	-3.916	32555	33668	631162
Mbuti	Shenxian	Guanzhuang	China_WLR_MN	-0.0204	-3.908	15052	15679	300763
Mbuti	Tonga_2500BP	Guanzhuang	China_WLR_MN	-0.0284	-3.8	5429	5746	108520
Mbuti	Han	Guanzhuang	China_WLR_MN	-0.0118	-3.739	32919	33707	632309
Mbuti	Miao	Guanzhuang	China_WLR_MN	-0.0127	-3.682	32819	33660	632275
Mbuti	Malaysia_historical	Guanzhuang	China_WLR_MN	-0.0204	-3.675	14143	14732	277533
Mbuti	Vietnam_BA	Guanzhuang	China_WLR_MN	-0.0238	-3.64	7512	7878	147808
Mbuti	China_Lahu	Guanzhuang	China_WLR_MN	-0.0126	-3.626	32693	33528	632249
Mbuti	Dusun	Guanzhuang	China_WLR_MN	-0.0126	-3.59	32587	33416	632215
Mbuti	Ami	Guanzhuang	China_WLR_MN	-0.0128	-3.511	32838	33692	632249
Mbuti	JPT	Guanzhuang	China_WLR_MN	-0.0091	-3.437	34110	34734	650685
Mbuti	Nepal_Chokhopani_2800BP	Guanzhuang	China_WLR_MN	-0.014	-3.336	33693	34647	649852
Mbuti	Taiwan_Hanben_IA	Guanzhuang	China_WLR_MN	-0.0094	-3.201	33405	34041	640949
Mbuti	Burmese	Guanzhuang	China_WLR_MN	-0.0105	-3.2	32604	33295	632274
Mbuti	ONG	Guanzhuang	China_WLR_MN	-0.0102	-3.069	32556	33227	647316
Mbuti	Thai	Guanzhuang	China_WLR_MN	-0.0103	-3.001	32592	33270	632250
Mbuti	Cambodian	Guanzhuang	China_WLR_MN	-0.0094	-2.95	32584	33205	632271
Mbuti	JXNT	Guanzhuang	China_WLR_MN	-0.0111	-2.91	30119	30792	578496
Mbuti	Khonda_Dora	Guanzhuang	China_WLR_MN	-0.0112	-2.871	31708	32429	631495
Mbuti	Indonesia_LN_BA_IA	Guanzhuang	China_WLR_MN	-0.0264	-2.69	2857	3012	58441
Mbuti	Liangdao2	Guanzhuang	China_WLR_MN	-0.0124	-2.673	22340	22903	443678
Mbuti	Laos_LN_BA	Guanzhuang	China_WLR_MN	-0.0117	-2.549	24725	25309	481603
Mbuti	Xitoucun	Guanzhuang	China_WLR_MN	-0.0122	-2.495	12540	12848	249915
Mbuti	China_SEastAsia_Coastal_Historic	Guanzhuang	China_WLR_MN	-0.0168	-2.48	6725	6956	134870
Mbuti	China_SEastAsia_Island_EN	Guanzhuang	China_WLR_MN	-0.0104	-2.432	23093	23580	457158
Mbuti	Vietnam_LN	Guanzhuang	China_WLR_MN	-0.0127	-2.404	10539	10810	212156
Mbuti	China_SEastAsia_Island_LN	Guanzhuang	China_WLR_MN	-0.0358	-2.391	1193	1282	25013
Mbuti	Suogang	Guanzhuang	China_WLR_MN	-0.0358	-2.391	1193	1282	25013
Mbuti	China_SEastAsia_Coastal_LN	Guanzhuang	China_WLR_MN	-0.01	-2.379	15443	15754	304987
Mbuti	Taiwan_Gongguan	Guanzhuang	China_WLR_MN	-0.0117	-2.343	15938	16315	312372
Mbuti	China_YR_LBIA	Guanzhuang	China_WLR_MN	-0.0072	-2.293	33626	34116	642265
Mbuti	Vietnam_BA_all	Guanzhuang	China_WLR_MN	-0.0126	-2.281	11293	11581	220501
Mbuti	Nepal_Mebrak_2125BP	Guanzhuang	China_WLR_MN	-0.0105	-2.275	21285	21736	410647
Mbuti	Dungan	Guanzhuang	China_WLR_MN	-0.0079	-2.266	33814	34355	650496
Mbuti	BaBanQinCen	Guanzhuang	China_WLR_MN	-0.0094	-2.264	17858	18196	350305
Mbuti	Maori	Guanzhuang	China_WLR_MN	-0.0081	-2.212	31617	32133	630621
Mbuti	Hawaiian	Guanzhuang	China_WLR_MN	-0.0085	-2.106	32572	33131	630313
Mbuti	LG	Guanzhuang	China_WLR_MN	-0.0081	-2.091	29610	30093	568775
Mbuti	Yi	Guanzhuang	China_WLR_MN	-0.0068	-2.02	33060	33510	632264
Mbuti	Igbo	Guanzhuang	China_WLR_MN	-0.0052	-2.013	25621	25888	632261
Mbuti	Bengali	Guanzhuang	China_WLR_MN	-0.0066	-2.011	31625	32043	632251
Mbuti	Vietnam_BA_DongSonCulture	Guanzhuang	China_WLR_MN	-0.0102	-1.974	10784	11006	223082
Mbuti	Tuscan_1	Guanzhuang	China_WLR_MN	-0.0067	-1.929	31220	31639	632258
Mbuti	LaCen	Guanzhuang	China_WLR_MN	-0.0087	-1.926	20284	20639	398579
Mbuti	China_SEastAsia_Coastal_EN	Guanzhuang	China_WLR_MN	-0.0131	-1.92	6505	6677	132545
Mbuti	Madiga	Guanzhuang	China_WLR_MN	-0.0062	-1.892	31589	31985	632276
Mbuti	Mongolia_Xiongnu_o1	Guanzhuang	China_WLR_MN	-0.0062	-1.858	33829	34255	650143
Mbuti	Mongolia_Bulgan_EarlyMedieval	Guanzhuang	China_WLR_MN	-0.0084	-1.854	23035	23424	449846
Mbuti	Qihe3	Guanzhuang	China_WLR_MN	-0.0093	-1.847	15804	16101	314897
Mbuti	Laos_BA	Guanzhuang	China_WLR_MN	-0.011	-1.8	10338	10568	203818
Mbuti	Lebanon_MBA	Guanzhuang	China_WLR_MN	-0.0056	-1.768	31775	32136	644612
Mbuti	Vietnam_N_published	Guanzhuang	China_WLR_MN	-0.02	-1.678	2052	2136	41678
Mbuti	Tu	Guanzhuang	China_WLR_MN	-0.0045	-1.666	34028	34336	650667
Mbuti	Tanshishan	Guanzhuang	China_WLR_MN	-0.0101	-1.666	8508	8681	169290
Mbuti	Baojianshan	Guanzhuang	China_WLR_MN	-0.0081	-1.655	19330	19645	382932
Mbuti	Brahmin	Guanzhuang	China_WLR_MN	-0.005	-1.648	31440	31758	632275
Mbuti	Guam_LateUnai_Ritidian	Guanzhuang	China_WLR_MN	-0.0161	-1.606	2791	2882	57905
Mbuti	Uyghur	Guanzhuang	China_WLR_MN	-0.0053	-1.569	32133	32475	632266
Mbuti	Korean	Guanzhuang	China_WLR_MN	-0.0052	-1.519	33125	33474	632274
Mbuti	China_YR_LN	Guanzhuang	China_WLR_MN	-0.0043	-1.469	34144	34438	648760
Mbuti	Tonga_2700BP	Guanzhuang	China_WLR_MN	-0.0126	-1.462	4080	4185	81443
Mbuti	Germany_EBA_Unetice	Guanzhuang	China_WLR_MN	-0.0047	-1.455	28211	28475	571013
Mbuti	Vietnam_historical	Guanzhuang	China_WLR_MN	-0.0092	-1.446	7450	7589	144417
Mbuti	Bergamo	Guanzhuang	China_WLR_MN	-0.0056	-1.431	31183	31536	630730
Mbuti	Lemande	Guanzhuang	China_WLR_MN	-0.0035	-1.385	25652	25830	632251
Mbuti	Myanmar_LN_BA_published_lc	Guanzhuang	China_WLR_MN	-0.0383	-1.354	321	346	6512
Mbuti	Thailand_IA	Guanzhuang	China_WLR_MN	-0.0287	-1.296	482	510	9615
Mbuti	Makrani	Guanzhuang	China_WLR_MN	-0.0041	-1.284	31085	31343	632256
Mbuti	Kapu	Guanzhuang	China_WLR_MN	-0.0042	-1.282	31649	31914	632272
Mbuti	Kazakhstan_Kipchak1	Guanzhuang	China_WLR_MN	-0.0056	-1.282	21928	22177	438081
Mbuti	Sindhi_Pakistan	Guanzhuang	China_WLR_MN	-0.0042	-1.276	31468	31732	632244
Mbuti	Vietnam_N_all_published	Guanzhuang	China_WLR_MN	-0.0136	-1.267	2473	2541	49818
Mbuti	Poland_Globular_Amphora_published	Guanzhuang	China_WLR_MN	-0.0161	-1.262	1582	1634	33250
Mbuti	Turkmenistan_IA	Guanzhuang	China_WLR_MN	-0.0054	-1.226	26795	27086	544286
Mbuti	Tibetan	Guanzhuang	China_WLR_MN	-0.004	-1.224	32902	33165	632264
Mbuti	Pathan	Guanzhuang	China_WLR_MN	-0.004	-1.224	31468	31720	632280
Mbuti	English	Guanzhuang	China_WLR_MN	-0.0042	-1.202	31416	31678	632265
Mbuti	Dushan	Guanzhuang	China_WLR_MN	-0.0062	-1.164	12781	12940	256458
Mbuti	Kusunda	Guanzhuang	China_WLR_MN	-0.0042	-1.162	32407	32680	632210
Mbuti	Taiwan_Hanben_IA_lc	Guanzhuang	China_WLR_MN	-0.0137	-1.139	1789	1839	35060
Mbuti	China_Upper_YR_LN	Guanzhuang	China_WLR_MN	-0.0038	-1.138	33937	34193	643265
Mbuti	Vanuatu_3000BP	Guanzhuang	China_WLR_MN	-0.0109	-1.132	2857	2920	56660
Mbuti	Balochi	Guanzhuang	China_WLR_MN	-0.0037	-1.119	31295	31526	632221
Mbuti	Mala	Guanzhuang	China_WLR_MN	-0.0035	-1.104	31655	31878	632301
Mbuti	Naxi	Guanzhuang	China_WLR_MN	-0.0034	-1.095	33209	33435	632305
Mbuti	China_Upper_YR_IA	Guanzhuang	China_WLR_MN	-0.0038	-1.092	32230	32476	614609
Mbuti	Kazakhstan_Karakhanid	Guanzhuang	China_WLR_MN	-0.005	-1.074	18086	18267	358805
Mbuti	Hazara	Guanzhuang	China_WLR_MN	-0.0037	-1.072	32233	32470	632227
Mbuti	Russia_EBA_o1	Guanzhuang	China_WLR_MN	-0.0068	-1.02	6129	6212	124475
Mbuti	China_Tianyuan	Guanzhuang	China_WLR_MN	-0.0049	-1.01	21483	21697	435774
Mbuti	Sweden_Motala_HG	Guanzhuang	China_WLR_MN	-0.0036	-1.001	28018	28221	565275
Mbuti	BedouinB	Guanzhuang	China_WLR_MN	-0.0032	-0.96	30775	30971	632220
Mbuti	Kazakhstan_Nomad_IA_o	Guanzhuang	China_WLR_MN	-0.0055	-0.869	7991	8079	161368
Mbuti	Sardinian	Guanzhuang	China_WLR_MN	-0.0028	-0.869	31254	31429	632308
Mbuti	China_AR_IA	Guanzhuang	China_WLR_MN	-0.011	-0.851	1452	1484	29184
Mbuti	Palestinian	Guanzhuang	China_WLR_MN	-0.0025	-0.841	30819	30972	632308
Mbuti	Russia_AfontovaGora3	Guanzhuang	China_WLR_MN	-0.006	-0.793	5240	5303	110656
Mbuti	Greece_BA_Mycenaean	Guanzhuang	China_WLR_MN	-0.0038	-0.786	10549	10630	234393
Mbuti	Iranian	Guanzhuang	China_WLR_MN	-0.0025	-0.777	31183	31339	632285
Mbuti	Burusho	Guanzhuang	China_WLR_MN	-0.0025	-0.775	31644	31805	632234
Mbuti	Orcadian	Guanzhuang	China_WLR_MN	-0.0027	-0.775	31457	31626	632252
Mbuti	Vanuatu_2900BP_all	Guanzhuang	China_WLR_MN	-0.0056	-0.739	4815	4870	93881
Mbuti	Estonia_CordedWare	Guanzhuang	China_WLR_MN	-0.0026	-0.728	28041	28189	567880
Mbuti	Turkmenistan_Gonur_BA_1	Guanzhuang	China_WLR_MN	-0.0023	-0.726	23945	24058	486760
Mbuti	Yadava	Guanzhuang	China_WLR_MN	-0.0022	-0.67	31688	31826	632253
Mbuti	Mongolia_Selenge_Xiongnu	Guanzhuang	China_WLR_MN	-0.003	-0.667	24561	24711	470647
Mbuti	Kazakhstan_Turk	Guanzhuang	China_WLR_MN	-0.0026	-0.659	29738	29891	588133
Mbuti	Turkmenistan_C_Namazga_1d	Guanzhuang	China_WLR_MN	-0.0106	-0.659	1102	1125	23052
Mbuti	Mongolia_Dundgobi_LatEMedieval	Guanzhuang	China_WLR_MN	-0.0029	-0.652	21521	21647	415277
Mbuti	Cretan	Guanzhuang	China_WLR_MN	-0.0021	-0.642	31247	31376	632236
Mbuti	Adygei	Guanzhuang	China_WLR_MN	-0.002	-0.621	31443	31572	632247
Mbuti	Chechen	Guanzhuang	China_WLR_MN	-0.0023	-0.615	31351	31497	630800
Mbuti	China_YR_MN	Guanzhuang	China_WLR_MN	-0.0021	-0.615	33985	34127	644343
Mbuti	Australian	Guanzhuang	China_WLR_MN	-0.0021	-0.573	31717	31850	632171
Mbuti	Xibo	Guanzhuang	China_WLR_MN	-0.0016	-0.557	34198	34306	650664
Mbuti	Liangdao1	Guanzhuang	China_WLR_MN	-0.0036	-0.557	8586	8648	176091
Mbuti	Russia_Ust_Ishim	Guanzhuang	China_WLR_MN	-0.0023	-0.554	29284	29417	593580
Mbuti	Italy_Sicily_HG_OrienteC	Guanzhuang	China_WLR_MN	-0.0077	-0.527	1352	1373	27531
Mbuti	Estonian	Guanzhuang	China_WLR_MN	-0.0018	-0.519	31513	31627	632276
Mbuti	Japanese	Guanzhuang	China_WLR_MN	-0.0016	-0.514	33239	33349	632301
Mbuti	Slovakia_Poprad	Guanzhuang	China_WLR_MN	-0.0026	-0.514	13491	13561	271767
Mbuti	Mongolia_Xiongnu_o2	Guanzhuang	China_WLR_MN	-0.0018	-0.482	30080	30191	596915
Mbuti	China_Wuzhuangguoliang_LN	Guanzhuang	China_WLR_MN	-0.0059	-0.476	1314	1330	26034
Mbuti	Russia_Tagar	Guanzhuang	China_WLR_MN	-0.0014	-0.476	32666	32756	647737
Mbuti	Hungary_IA_Scythian	Guanzhuang	China_WLR_MN	-0.0017	-0.458	28012	28107	566570
Mbuti	China_Shimao_LN	Guanzhuang	China_WLR_MN	-0.0017	-0.455	33797	33911	639908
Mbuti	Russia_MBA_Poltavka	Guanzhuang	China_WLR_MN	-0.0017	-0.455	23784	23867	479437
Mbuti	Bougainville	Guanzhuang	China_WLR_MN	-0.0016	-0.445	31945	32050	632035
Mbuti	Spain_ElMiron	Guanzhuang	China_WLR_MN	-0.0022	-0.42	13496	13555	282346
Mbuti	Hungarian	Guanzhuang	China_WLR_MN	-0.0014	-0.418	31495	31586	632241
Mbuti	Kazakhstan_Nomad_IA	Guanzhuang	China_WLR_MN	-0.0017	-0.416	22418	22496	445615
Mbuti	Basque	Guanzhuang	China_WLR_MN	-0.0014	-0.414	31408	31495	632268
Mbuti	Albanian	Guanzhuang	China_WLR_MN	-0.0015	-0.402	31398	31493	631556
Mbuti	Daur	Guanzhuang	China_WLR_MN	-0.0016	-0.402	33063	33169	630688
Mbuti	Relli_1	Guanzhuang	China_WLR_MN	-0.0014	-0.402	31790	31882	631656
Mbuti	Kalash	Guanzhuang	China_WLR_MN	-0.0013	-0.362	31598	31677	632274
Mbuti	Papuan	Guanzhuang	China_WLR_MN	-0.0012	-0.356	31749	31826	632318
Mbuti	Brahui	Guanzhuang	China_WLR_MN	-0.0011	-0.339	31282	31352	632256
Mbuti	Russia_Samara_EBA_Yamnaya_published	Guanzhuang	China_WLR_MN	-0.0017	-0.33	14440	14489	296439
Mbuti	Turkey_MLBA_AssyrianColonyPeriod	Guanzhuang	China_WLR_MN	-0.0013	-0.306	20596	20649	419795
Mbuti	Greece_Minoan_Odigitria	Guanzhuang	China_WLR_MN	-0.0018	-0.276	5990	6012	123049
Mbuti	Yiyang	Guanzhuang	China_WLR_MN	-0.0017	-0.24	5908	5928	117526
Mbuti	Sherpa	Guanzhuang	China_WLR_MN	-0.0008	-0.239	33158	33214	632266
Mbuti	Polish	Guanzhuang	China_WLR_MN	-0.0009	-0.237	31396	31453	631133
Mbuti	Jew_Yemenite	Guanzhuang	China_WLR_MN	-0.0007	-0.228	30888	30933	632260
Mbuti	French	Guanzhuang	China_WLR_MN	-0.0007	-0.224	31536	31581	632313
Mbuti	Kazakhstan_Kangju_o1	Guanzhuang	China_WLR_MN	-0.0009	-0.224	20640	20678	417729
Mbuti	Vietnam_N	Guanzhuang	China_WLR_MN	-0.0016	-0.219	5313	5329	103647
Mbuti	Lezgin	Guanzhuang	China_WLR_MN	-0.0007	-0.214	31380	31423	632286
Mbuti	Mongolia_Arkhangai_XiongnuEarlyMedieval_1	Guanzhuang	China_WLR_MN	-0.0009	-0.199	23661	23703	477295
Mbuti	Guanzhuang_o1	Guanzhuang	China_WLR_MN	-0.0035	-0.193	732	737	13802
Mbuti	Spain_HG	Guanzhuang	China_WLR_MN	-0.0008	-0.167	26085	26126	524539
Mbuti	Georgian	Guanzhuang	China_WLR_MN	-0.0005	-0.159	31331	31365	632284
Mbuti	Russia_Samara_EBA_Yamnaya	Guanzhuang	China_WLR_MN	-0.0005	-0.157	30167	30198	605471
Mbuti	Turkish	Guanzhuang	China_WLR_MN	-0.0005	-0.145	31402	31431	632282
Mbuti	China_Xinjian_IA	Guanzhuang	China_WLR_MN	-0.0005	-0.121	23362	23383	456033
Mbuti	Finnish	Guanzhuang	China_WLR_MN	-0.0004	-0.119	31648	31672	632310
Mbuti	Kazakhstan_Karluk_1	Guanzhuang	China_WLR_MN	-0.0004	-0.097	30929	30953	604516
Mbuti	Irula	Guanzhuang	China_WLR_MN	-0.0003	-0.095	31708	31728	632277
Mbuti	Bulgaria_BeliBreyag_EBA	Guanzhuang	China_WLR_MN	-0.0003	-0.043	5718	5721	117923
Mbuti	Mongolia_Arkhangai_XiongnuEarlyMedieval_3	Guanzhuang	China_WLR_MN	-0.0001	-0.039	32544	32551	631232
Mbuti	Russia_AfontovaGora2	Guanzhuang	China_WLR_MN	-0.0004	-0.033	1744	1745	34589
Mbuti	Kyrgyzstan_TianShan_Hun	Guanzhuang	China_WLR_MN	-0.0001	-0.026	33039	33044	650573
Mbuti	Russia_Samara_EBA_Yamnaya_published2	Guanzhuang	China_WLR_MN	-0.0001	-0.019	29435	29440	590485
Mbuti	Georgia_Kotias	Guanzhuang	China_WLR_MN	0.0001	0.029	32293	32285	650201
Mbuti	Russia_Potapovka	Guanzhuang	China_WLR_MN	0.0003	0.034	3632	3629	73594
Mbuti	Armenian	Guanzhuang	China_WLR_MN	0.0001	0.04	31338	31329	632268
Mbuti	Kazakhstan_Wusun_LateSaka_dup	Guanzhuang	China_WLR_MN	0.0003	0.048	6842	6838	135304
Mbuti	Mongola	Guanzhuang	China_WLR_MN	0.0002	0.064	33173	33159	632274
Mbuti	Moldova_Glinoe_Scythian	Guanzhuang	China_WLR_MN	0.0002	0.072	30966	30952	618673
Mbuti	Russia_IA_EarlySarmatian	Guanzhuang	China_WLR_MN	0.0005	0.104	19003	18986	383564
Mbuti	Russia_SaltovoMayaki	Guanzhuang	China_WLR_MN	0.0012	0.114	2278	2272	48225
Mbuti	Philippines_RedSlippedPottery	Guanzhuang	China_WLR_MN	0.0026	0.121	580	577	11640
Mbuti	China_Miaozigou_MN	Guanzhuang	China_WLR_MN	0.0008	0.135	9426	9412	179524
Mbuti	Punjabi	Guanzhuang	China_WLR_MN	0.0005	0.165	31756	31723	632315
Mbuti	Spanish	Guanzhuang	China_WLR_MN	0.0006	0.168	31386	31351	632214
Mbuti	Tajik	Guanzhuang	China_WLR_MN	0.0006	0.171	31596	31560	632283
Mbuti	Nepal_Samdzong_1500BP	Guanzhuang	China_WLR_MN	0.0006	0.188	34109	34069	650188
Mbuti	Longlin	Guanzhuang	China_WLR_MN	0.0016	0.188	3959	3946	80256
Mbuti	Russia_Tuva_IA_AldyBel	Guanzhuang	China_WLR_MN	0.0009	0.195	19923	19887	397340
Mbuti	USA_WA_Kennewick	Guanzhuang	China_WLR_MN	0.001	0.204	20633	20592	398821
Mbuti	Chukchi	Guanzhuang	China_WLR_MN	0.0008	0.213	32331	32277	631621
Mbuti	Ukraine_Scythian	Guanzhuang	China_WLR_MN	0.0009	0.23	30550	30496	611851
Mbuti	Russia_HG_Karelia	Guanzhuang	China_WLR_MN	0.0011	0.242	27378	27319	548362
Mbuti	Russia_LBA_1	Guanzhuang	China_WLR_MN	0.0032	0.262	1823	1811	36528
Mbuti	Bulgarian	Guanzhuang	China_WLR_MN	0.0009	0.263	31413	31358	632175
Mbuti	Russia_Abkhasian	Guanzhuang	China_WLR_MN	0.0009	0.27	31459	31405	632266
Mbuti	Mongolia_Khentii_EIA_SlabGrave	Guanzhuang	China_WLR_MN	0.0026	0.28	3268	3251	63109
Mbuti	Canada_MDorset_published	Guanzhuang	China_WLR_MN	0.0029	0.289	2682	2666	50976
Mbuti	Russian	Guanzhuang	China_WLR_MN	0.001	0.289	31777	31716	632287
Mbuti	Laos_Hoabinhian	Guanzhuang	China_WLR_MN	0.0016	0.301	13981	13936	282240
Mbuti	Iran_C_SehGabi	Guanzhuang	China_WLR_MN	0.0011	0.322	27090	27031	549091
Mbuti	Japan_Jomon	Guanzhuang	China_WLR_MN	0.0015	0.323	26379	26301	511599
Mbuti	Moldova_Cimmerian	Guanzhuang	China_WLR_MN	0.0013	0.326	21952	21894	433397
Mbuti	Turkmenistan_C_Namazga	Guanzhuang	China_WLR_MN	0.0016	0.349	18232	18174	376687
Mbuti	Armenia_EBA	Guanzhuang	China_WLR_MN	0.0013	0.379	26399	26332	535504
Mbuti	Russia_Srubnaya	Guanzhuang	China_WLR_MN	0.0012	0.384	31333	31261	626082
Mbuti	Turkey_N	Guanzhuang	China_WLR_MN	0.0012	0.399	31526	31447	634495
Mbuti	Kongo	Guanzhuang	China_WLR_MN	0.0013	0.402	25540	25476	630465
Mbuti	Icelandic	Guanzhuang	China_WLR_MN	0.0014	0.408	31610	31524	632275
Mbuti	Bulgaria_IA	Guanzhuang	China_WLR_MN	0.0021	0.41	14076	14018	284381
Mbuti	Kurumba	Guanzhuang	China_WLR_MN	0.0016	0.414	31681	31579	628849
Mbuti	Kazakhstan_Botai_Eneolithic	Guanzhuang	China_WLR_MN	0.0017	0.414	23827	23747	470994
Mbuti	Mansi	Guanzhuang	China_WLR_MN	0.0014	0.431	32407	32315	632284
Mbuti	Greece_Minoan_Lassithi	Guanzhuang	China_WLR_MN	0.0016	0.449	26519	26432	541612
Mbuti	Druze	Guanzhuang	China_WLR_MN	0.0016	0.46	31188	31090	632234
Mbuti	Spain_C	Guanzhuang	China_WLR_MN	0.0015	0.523	31124	31029	624180
Mbuti	Kazakhstan_Nomad_HP	Guanzhuang	China_WLR_MN	0.0019	0.529	32830	32702	627835
Mbuti	Mongolia_Bulgan_Xiongnu	Guanzhuang	China_WLR_MN	0.0023	0.595	27197	27069	522462
Mbuti	Kazakhstan_IA_Saka_dup	Guanzhuang	China_WLR_MN	0.0049	0.601	4329	4287	86179
Mbuti	Mongolia_Selenge_XiongnuMedieval_o1	Guanzhuang	China_WLR_MN	0.0041	0.627	7706	7643	148363
Mbuti	Vanuatu_2900BP	Guanzhuang	China_WLR_MN	0.0056	0.633	3280	3244	63448
Mbuti	Kashmiri_Pandit	Guanzhuang	China_WLR_MN	0.0024	0.635	31617	31463	630963
Mbuti	Germany_CordedWare	Guanzhuang	China_WLR_MN	0.0021	0.64	30889	30761	618067
Mbuti	Kazakhstan_ZevakinoChilikta_IA_2	Guanzhuang	China_WLR_MN	0.004	0.644	8436	8368	165264
Mbuti	Altaian	Guanzhuang	China_WLR_MN	0.0026	0.649	32857	32687	631113
Mbuti	Russia_Alan	Guanzhuang	China_WLR_MN	0.0021	0.655	32372	32235	646351
Mbuti	Kazakhstan_Wusun	Guanzhuang	China_WLR_MN	0.0026	0.662	29577	29423	586713
Mbuti	Russia_NorthOssetian	Guanzhuang	China_WLR_MN	0.0022	0.698	31603	31462	632291
Mbuti	Russia_MLBA_Sintashta	Guanzhuang	China_WLR_MN	0.002	0.7	31674	31546	631400
Mbuti	Russia_Siberia_Lena_EBA_o	Guanzhuang	China_WLR_MN	0.0084	0.701	1757	1728	34477
Mbuti	USA_Ancient_Beringian	Guanzhuang	China_WLR_MN	0.0031	0.752	33958	33748	650608
Mbuti	Israel_C	Guanzhuang	China_WLR_MN	0.0025	0.756	28035	27898	569453
Mbuti	Russia_CentralYakutia_IA	Guanzhuang	China_WLR_MN	0.0088	0.764	2284	2244	42368
Mbuti	Russia_Afanasievo	Guanzhuang	China_WLR_MN	0.0022	0.769	31471	31330	626146
Mbuti	Kazakhstan_Central_Steppe_EMBA	Guanzhuang	China_WLR_MN	0.0028	0.781	33472	33284	650441
Mbuti	Russia_Buryatia_Xiongnu_mother	Guanzhuang	China_WLR_MN	0.0041	0.813	19026	18871	365396
Mbuti	Russia_Karasuk_oRISE	Guanzhuang	China_WLR_MN	0.0025	0.816	32894	32731	648051
Mbuti	Kyrgyzstan_Medieval_Nomad_o	Guanzhuang	China_WLR_MN	0.0046	0.833	13922	13796	269052
Mbuti	Kazakhstan_Central_Saka	Guanzhuang	China_WLR_MN	0.0027	0.839	31941	31766	623038
Mbuti	China_WLR_LN	Guanzhuang	China_WLR_MN	0.0033	0.853	26356	26184	500713
Mbuti	Iran_GanjDareh_N	Guanzhuang	China_WLR_MN	0.0029	0.869	28060	27895	570270
Mbuti	Bulgaria_Varna_C	Guanzhuang	China_WLR_MN	0.0052	0.889	9611	9510	196937
Mbuti	Israel_Natufian_published	Guanzhuang	China_WLR_MN	0.0071	0.895	4079	4021	84053
Mbuti	Kazakhstan_Kimak	Guanzhuang	China_WLR_MN	0.0064	0.925	6343	6262	123051
Mbuti	Russia_IA_2	Guanzhuang	China_WLR_MN	0.0045	0.953	22505	22303	441666
Mbuti	Germany_BellBeaker	Guanzhuang	China_WLR_MN	0.0029	0.991	31538	31358	630088
Mbuti	Mongolia_Sukhbaatar_MLBAXiongnuLatEMedieval_sister	Guanzhuang	China_WLR_MN	0.013	1.016	1645	1603	30917
Mbuti	Mongolia_Dornod_PreBronze	Guanzhuang	China_WLR_MN	0.0081	1.018	4834	4756	92504
Mbuti	Germany_EN_LBK	Guanzhuang	China_WLR_MN	0.0031	1.018	31145	30952	627027
Mbuti	Aleut	Guanzhuang	China_WLR_MN	0.0034	1.037	32559	32339	632292
Mbuti	Czech	Guanzhuang	China_WLR_MN	0.0043	1.064	31649	31380	631040
Mbuti	Kazakhstan_Nomad_Hun_Sarmatian	Guanzhuang	China_WLR_MN	0.0041	1.065	28909	28675	554209
Mbuti	Mixtec_1	Guanzhuang	China_WLR_MN	0.0045	1.097	32732	32441	630186
Mbuti	Georgia_Satsurblia	Guanzhuang	China_WLR_MN	0.0049	1.115	23410	23180	470483
Mbuti	Canada_MDorset	Guanzhuang	China_WLR_MN	0.0142	1.119	1762	1713	34134
Mbuti	Mayan	Guanzhuang	China_WLR_MN	0.0043	1.166	33021	32741	632186
Mbuti	Bulgaria_C	Guanzhuang	China_WLR_MN	0.0038	1.179	27079	26877	546760
Mbuti	Cree1	Guanzhuang	China_WLR_MN	0.0045	1.184	32513	32221	631057
Mbuti	USA_Anzick_realigned	Guanzhuang	China_WLR_MN	0.0058	1.29	33616	33226	640737
Mbuti	Mongolia_Arkhangai_EarlyMedieval	Guanzhuang	China_WLR_MN	0.0039	1.3	31802	31557	630290
Mbuti	Kazakhstan_Kumsay_EBA	Guanzhuang	China_WLR_MN	0.005	1.309	24879	24632	492148
Mbuti	Mongolia_EBA_Chemurchek_2	Guanzhuang	China_WLR_MN	0.0053	1.322	23007	22766	459480
Mbuti	Russia_MA1_HG	Guanzhuang	China_WLR_MN	0.0064	1.325	22387	22101	441645
Mbuti	Turkey_EBA_II	Guanzhuang	China_WLR_MN	0.0049	1.346	28266	27990	575092
Mbuti	Mongolia_Khovd_MLBAXiongnuLatEMedieval	Guanzhuang	China_WLR_MN	0.0073	1.358	13778	13579	263145
Mbuti	Spain_EN	Guanzhuang	China_WLR_MN	0.0045	1.364	28140	27888	570026
Mbuti	Mongolia_Tuv_Xiongnu	Guanzhuang	China_WLR_MN	0.0059	1.377	28288	27956	537598
Mbuti	Canada_LateDorset	Guanzhuang	China_WLR_MN	0.0094	1.382	7638	7496	147280
Mbuti	Mongolia_LBA_Ulaanzukh_2_dup	Guanzhuang	China_WLR_MN	0.0066	1.384	22202	21911	425043
Mbuti	Piapoco	Guanzhuang	China_WLR_MN	0.0051	1.392	33006	32674	632221
Mbuti	Mongolia_Arkhangai_XiongnuEarlyMedieval_2	Guanzhuang	China_WLR_MN	0.0055	1.402	21945	21705	439568
Mbuti	Mongolia_Uvurkhangai_EIALatEMedieval	Guanzhuang	China_WLR_MN	0.0054	1.408	26780	26494	513203
Mbuti	Russia_BA_Okunevo	Guanzhuang	China_WLR_MN	0.0043	1.417	33396	33110	650483
Mbuti	Russia_Mezhovskaya	Guanzhuang	China_WLR_MN	0.0059	1.441	28345	28011	566275
Mbuti	Tubalar	Guanzhuang	China_WLR_MN	0.0047	1.443	32725	32419	632286
Mbuti	Mongolia_Chalcolithic_Afanasievo_1	Guanzhuang	China_WLR_MN	0.0071	1.472	18443	18184	370528
Mbuti	Jordan_PPNB_published	Guanzhuang	China_WLR_MN	0.0136	1.477	3388	3297	69035
Mbuti	Yakut	Guanzhuang	China_WLR_MN	0.0049	1.483	33215	32889	632249
Mbuti	Armenia_LBA	Guanzhuang	China_WLR_MN	0.0071	1.5	12501	12325	257585
Mbuti	Spain_MLN	Guanzhuang	China_WLR_MN	0.0046	1.527	30820	30540	617666
Mbuti	Pakistan_Loebanr_IA	Guanzhuang	China_WLR_MN	0.0042	1.529	30962	30706	617056
Mbuti	Italy_North_Villabruna_HG	Guanzhuang	China_WLR_MN	0.0071	1.53	21602	21297	435744
Mbuti	Kazakhstan_IA_Berel_Pazyryk	Guanzhuang	China_WLR_MN	0.0059	1.568	29174	28831	567879
Mbuti	Eskimo_Sireniki	Guanzhuang	China_WLR_MN	0.0059	1.582	33191	32803	632279
Mbuti	Mexico_Zapotec	Guanzhuang	China_WLR_MN	0.0058	1.583	33026	32646	632233
Mbuti	Mongolia_Khuvsgul_XiongnuLatEMedieval_1	Guanzhuang	China_WLR_MN	0.0051	1.586	29011	28714	569831
Mbuti	Mixe	Guanzhuang	China_WLR_MN	0.0058	1.61	33019	32640	632300
Mbuti	Armenia_C	Guanzhuang	China_WLR_MN	0.0056	1.621	27393	27086	551945
Mbuti	Quechua	Guanzhuang	China_WLR_MN	0.006	1.648	33098	32704	632251
Mbuti	China_WLR_BA	Guanzhuang	China_WLR_MN	0.0075	1.649	16940	16689	322790
Mbuti	Russia_Chita_BA	Guanzhuang	China_WLR_MN	0.0133	1.682	5046	4914	95426
Mbuti	China_AmurRiver_EarlyN	Guanzhuang	China_WLR_MN	0.0077	1.722	18558	18274	356145
Mbuti	Russia_LenaRiver_EN	Guanzhuang	China_WLR_MN	0.0076	1.728	28760	28324	541425
Mbuti	Mongolia_Sukhbaatar_MLBA	Guanzhuang	China_WLR_MN	0.0095	1.78	15633	15338	300143
Mbuti	Russia_EarlyMedieval_Heshui_Mohe_1	Guanzhuang	China_WLR_MN	0.0124	1.812	6416	6259	122949
Mbuti	Russia_Siberia_Tenisei_EBA	Guanzhuang	China_WLR_MN	0.0091	1.854	20289	19923	392931
Mbuti	Russia_UstIda_LN	Guanzhuang	China_WLR_MN	0.0071	1.922	31319	30875	600495
Mbuti	Karitiana	Guanzhuang	China_WLR_MN	0.007	1.945	33170	32707	632293
Mbuti	Russia_ArgunRiver_M	Guanzhuang	China_WLR_MN	0.0088	1.983	33859	33272	639141
Mbuti	Jordan_EBA	Guanzhuang	China_WLR_MN	0.0079	2.001	20652	20329	419943
Mbuti	Boshan	Guanzhuang	China_WLR_MN	0.0096	2.06	26097	25600	498985
Mbuti	Mongolia_Tuv_EIA	Guanzhuang	China_WLR_MN	0.0113	2.075	15107	14770	287477
Mbuti	Chane	Guanzhuang	China_WLR_MN	0.0087	2.085	33152	32579	631378
Mbuti	Russia_Andronovo	Guanzhuang	China_WLR_MN	0.0074	2.113	32247	31773	641490
Mbuti	Russia_Kalmykia_EBA_Yamnaya	Guanzhuang	China_WLR_MN	0.0073	2.167	30151	29712	602297
Mbuti	Russia_AngaraRiver_EN	Guanzhuang	China_WLR_MN	0.0095	2.172	32462	31854	613719
Mbuti	Mongolia_EIA_8	Guanzhuang	China_WLR_MN	0.0107	2.189	19713	19297	375399
Mbuti	Surui	Guanzhuang	China_WLR_MN	0.0086	2.212	33219	32652	632220
Mbuti	Russia_KuengaRiver_N_2	Guanzhuang	China_WLR_MN	0.0107	2.256	30905	30249	580923
Mbuti	Oroqen	Guanzhuang	China_WLR_MN	0.0081	2.298	33496	32955	632245
Mbuti	Mongolia_IA_Xianbei	Guanzhuang	China_WLR_MN	0.0107	2.3	19996	19573	385006
Mbuti	Mongolia_Ulaanbaatar_EIALatEMedieval	Guanzhuang	China_WLR_MN	0.0129	2.31	12789	12463	246091
Mbuti	Mongolia_Arkhangai_MLBAtoEIAorMedieval_o	Guanzhuang	China_WLR_MN	0.0178	2.326	5311	5126	100613
Mbuti	Mongolia_Sukhbaatar_LatEMedieval	Guanzhuang	China_WLR_MN	0.0065	2.343	33801	33361	639687
Mbuti	Mongolia_EBA_Ulgii_1_dup	Guanzhuang	China_WLR_MN	0.0113	2.408	26771	26174	512419
Mbuti	Chipewyan	Guanzhuang	China_WLR_MN	0.0088	2.415	33168	32590	632273
Mbuti	Mongolia_Bulgan_LatEMedieval	Guanzhuang	China_WLR_MN	0.0114	2.495	21922	21429	415715
Mbuti	Russia_KuengaRiver_N_1	Guanzhuang	China_WLR_MN	0.0271	2.506	2296	2175	43462
Mbuti	Eskimo_Chaplin	Guanzhuang	China_WLR_MN	0.0107	2.517	33367	32659	631651
Mbuti	Mongolia_Khovd_MLBAEarlyMedieval	Guanzhuang	China_WLR_MN	0.0096	2.539	28290	27751	553551
Mbuti	Russia_Shamanka_EBA	Guanzhuang	China_WLR_MN	0.0095	2.545	31415	30822	597063
Mbuti	Buryat	Guanzhuang	China_WLR_MN	0.0077	2.547	34296	33774	650671
Mbuti	Mongolia_Arkhangai_Xiongnu_o	Guanzhuang	China_WLR_MN	0.0119	2.554	26724	26097	504777
Mbuti	Russia_Buryatia_PreBronze	Guanzhuang	China_WLR_MN	0.0116	2.615	22624	22107	429380
Mbuti	Mongolia_EIA_Xiongnu_7	Guanzhuang	China_WLR_MN	0.0124	2.629	19590	19110	372715
Mbuti	Hezhen	Guanzhuang	China_WLR_MN	0.0094	2.669	33528	32901	632278
Mbuti	Russia_KolymaRiver_LN_1d	Guanzhuang	China_WLR_MN	0.0161	2.677	12711	12309	237304
Mbuti	Kazakhstan_GoldenHordeAsian	Guanzhuang	China_WLR_MN	0.0121	2.782	32614	31836	614993
Mbuti	Kazakhstan_Berel_IA_o3	Guanzhuang	China_WLR_MN	0.0095	2.791	32121	31516	609743
Mbuti	Russia_DevilsCave_N	Guanzhuang	China_WLR_MN	0.0105	2.805	34668	33948	650460
Mbuti	China_AR_Xianbei_IA	Guanzhuang	China_WLR_MN	0.0179	2.829	8086	7801	152885
Mbuti	Mongolia_Uvs_EIAXiongnuLateMedival	Guanzhuang	China_WLR_MN	0.0084	2.837	31594	31069	616598
Mbuti	Kazakhstan_Korgantas_IA	Guanzhuang	China_WLR_MN	0.0133	2.847	24728	24077	470730
Mbuti	Mongolia_LBA_CenterWest_4_o	Guanzhuang	China_WLR_MN	0.0141	2.854	20409	19842	387244
Mbuti	Kazakhstan_TianShan_Saka	Guanzhuang	China_WLR_MN	0.0317	2.883	2176	2043	42861
Mbuti	Russia_Krasnoyarsk_BA	Guanzhuang	China_WLR_MN	0.0123	2.885	34494	33656	650320
Mbuti	Eskimo_Naukan	Guanzhuang	China_WLR_MN	0.0108	2.917	33362	32652	632258
Mbuti	Russia_Lokomotiv_Eneolithic	Guanzhuang	China_WLR_MN	0.0107	2.947	30505	29860	576420
Mbuti	Nahua	Guanzhuang	China_WLR_MN	0.0119	2.951	33200	32416	631546
Mbuti	Russia_Blagovechensk_IA	Guanzhuang	China_WLR_MN	0.0159	2.976	14019	13581	262728
Mbuti	Russia_Kurma_EBA	Guanzhuang	China_WLR_MN	0.0135	2.983	20589	20041	392285
Mbuti	China_AmurRiver_BA	Guanzhuang	China_WLR_MN	0.0746	2.983	453	390	8259
Mbuti	Ulchi	Guanzhuang	China_WLR_MN	0.0101	2.997	33512	32840	632242
Mbuti	Mongolia_Umungobi_LatEMedieval	Guanzhuang	China_WLR_MN	0.0101	3.021	30415	29808	579243
Mbuti	Russia_KolymaRiver_LN	Guanzhuang	China_WLR_MN	0.011	3.06	34537	33785	650561
Mbuti	Mongolia_Dornod_Xiongnu	Guanzhuang	China_WLR_MN	0.0131	3.076	26056	25380	493653
Mbuti	China_AR_EN	Guanzhuang	China_WLR_MN	0.0172	3.084	10029	9690	188932
Mbuti	China_AmurRiver_LPaleolithic	Guanzhuang	China_WLR_MN	0.013	3.13	22646	22066	433090
Mbuti	Mongolia_Khentii_LatEMedieval	Guanzhuang	China_WLR_MN	0.0125	3.144	27113	26441	515474
Mbuti	Mongolia_Khuvsgul_XiongnuLatEMedieval_2	Guanzhuang	China_WLR_MN	0.0103	3.182	31035	30403	591451
Mbuti	China_HMMH_MN	Guanzhuang	China_WLR_MN	0.0156	3.189	21149	20500	399407
Mbuti	Russia_IA_Yankovsky	Guanzhuang	China_WLR_MN	0.0168	3.205	16144	15612	304842
Mbuti	Mongolia_Uvurkhangai_Xiongnu	Guanzhuang	China_WLR_MN	0.0125	3.271	28606	27901	541445
Mbuti	Mongolia_Tuv_LatEMedieval	Guanzhuang	China_WLR_MN	0.0119	3.317	27388	26742	519735
Mbuti	Russia_CentralYakutia_LN	Guanzhuang	China_WLR_MN	0.0145	3.344	33636	32675	630148
Mbuti	Mongolia_Sukhbaatar_MLBAXiongnuLatEMedieval	Guanzhuang	China_WLR_MN	0.0102	3.354	33139	32468	625441
Mbuti	Russia_UstIda_EBA	Guanzhuang	China_WLR_MN	0.0128	3.458	25762	25110	491365
Mbuti	Mongolia_Dornod_LatEMedieval	Guanzhuang	China_WLR_MN	0.0114	3.536	32231	31502	611268
Mbuti	Koryak	Guanzhuang	China_WLR_MN	0.0132	3.537	34591	33687	650647
Mbuti	China_WLR_BA_o	Guanzhuang	China_WLR_MN	0.0165	3.549	22761	22021	427213
Mbuti	Russia_Siberia_UP	Guanzhuang	China_WLR_MN	0.0179	3.563	15108	14576	290170
Mbuti	Mongolia_Khentii_Xiongnu	Guanzhuang	China_WLR_MN	0.0167	3.645	24736	23925	466233
Mbuti	Russia_UstBelaya_Angara	Guanzhuang	China_WLR_MN	0.0124	3.743	31614	30839	599125
Mbuti	Mongolia_Bulgan_EarlyMedievalLatEMedieval	Guanzhuang	China_WLR_MN	0.0123	3.818	32287	31504	611275
Mbuti	Russia_Shamanka_Eneolithic	Guanzhuang	China_WLR_MN	0.012	3.885	34643	33823	650605
Mbuti	Mongolia_Khentii_Xiongnu_daughter	Guanzhuang	China_WLR_MN	0.0198	3.887	16262	15631	307136
Mbuti	Even	Guanzhuang	China_WLR_MN	0.0138	3.958	33556	32641	632285
Mbuti	Russia_Buryatia_Xiongnu	Guanzhuang	China_WLR_MN	0.013	4.061	30885	30092	583812
Mbuti	Mongolia_Arkhangai_PreBronze	Guanzhuang	China_WLR_MN	0.0196	4.205	20888	20083	393826
Mbuti	Russia_AginBuryat_N	Guanzhuang	China_WLR_MN	0.0228	4.272	11820	11293	219927
Mbuti	Russia_MN_Boisman	Guanzhuang	China_WLR_MN	0.0154	4.3	27986	27135	527937
Mbuti	China_NEastAsia_Coastal_EN	Guanzhuang	China_WLR_MN	0.0158	4.349	29689	28766	557901
Mbuti	Shandong_EN	Guanzhuang	China_WLR_MN	0.0173	4.457	26279	25387	493794
Mbuti	Mongolia_Chalcolithic_Afanasievo_2	Guanzhuang	China_WLR_MN	0.0219	4.458	17840	17075	337576
Mbuti	Mongolia_East_N	Guanzhuang	China_WLR_MN	0.0178	4.526	27282	26330	512451
Mbuti	Greenland_Saqqaq	Guanzhuang	China_WLR_MN	0.0204	4.55	30921	29682	584250
Mbuti	Russia_KadalinkaRiver_N	Guanzhuang	China_WLR_MN	0.0216	4.674	32675	31295	605240
Mbuti	Mongolia_LBA_Ulaanzukh_2	Guanzhuang	China_WLR_MN	0.0183	4.837	24065	23199	454320
Mbuti	China_AmurRiver_Mesolithic	Guanzhuang	China_WLR_MN	0.0207	4.842	16867	16182	320968
Mbuti	China_AmurRiver_N	Guanzhuang	China_WLR_MN	0.0185	4.966	21861	21066	414487
Mbuti	China_NEastAsia_Inland_EN	Guanzhuang	China_WLR_MN	0.0249	5.078	21449	20407	405815
Mbuti	Yumin	Guanzhuang	China_WLR_MN	0.0249	5.078	21449	20407	405815
Mbuti	Mongolia_EIA_SlabGrave_1	Guanzhuang	China_WLR_MN	0.0162	5.422	32532	31493	610407
Mbuti	Russia_Siberia_Irkutsk_EBA	Guanzhuang	China_WLR_MN	0.0214	5.465	27259	26116	511433
Mbuti	Mongolia_North_N	Guanzhuang	China_WLR_MN	0.0192	5.503	30147	29009	566747

[truncated: 8 more sheets: K, L, M, N, O, P, Q, R]
